# Supplementary material for: RNA-Seq Reveals That Multiple Pathways Are Involved in Tuber Expansion in Tiger Nuts (Cyperus esculentus L.)
Source: MDPI journal article supplement (doi:10.3390/ijms25105100), 2024-05-07
Supplement: s1 [file s1]

Supplementary Figure Information

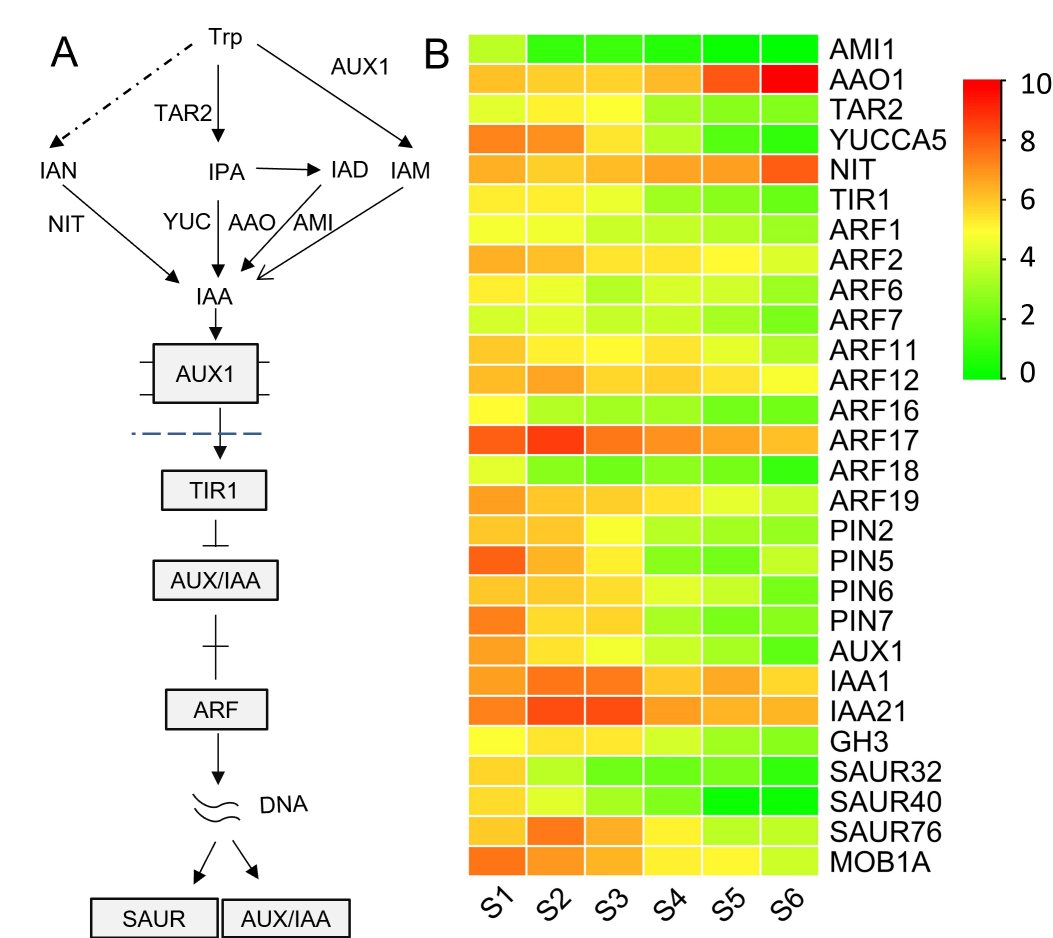

**Figure S1.** Analysis of DEGs related to IAA during tuber expansion. (A) IAA synthesis and signal transduction pathway; (B) Heatmap analysis of IAA synthesis and signal transduction related genes.

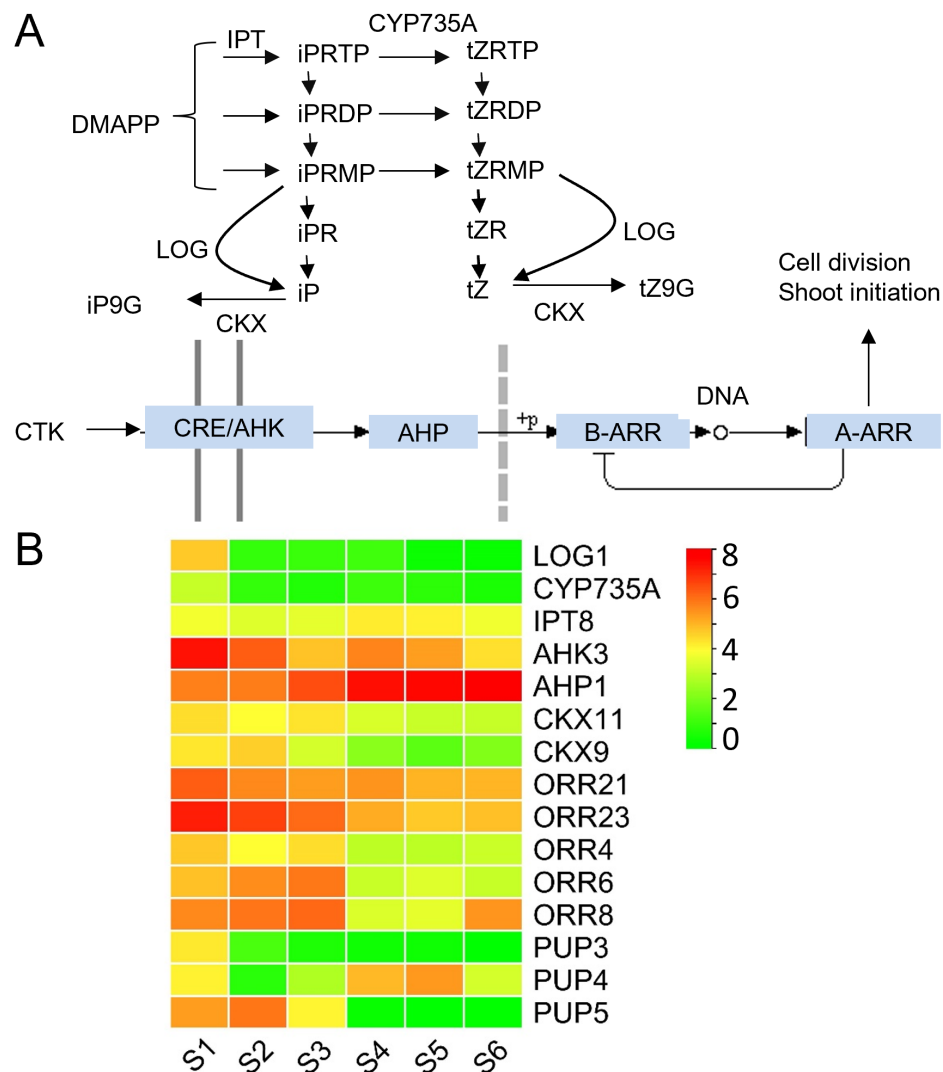

**Figure S2.** Analysis of DEGs related to cytokinin during tuber expansion. (A) Cytokinin synthesis and signal transduction pathway; (B) Heatmap analysis of cytokinin synthesis and signal transduction related genes.

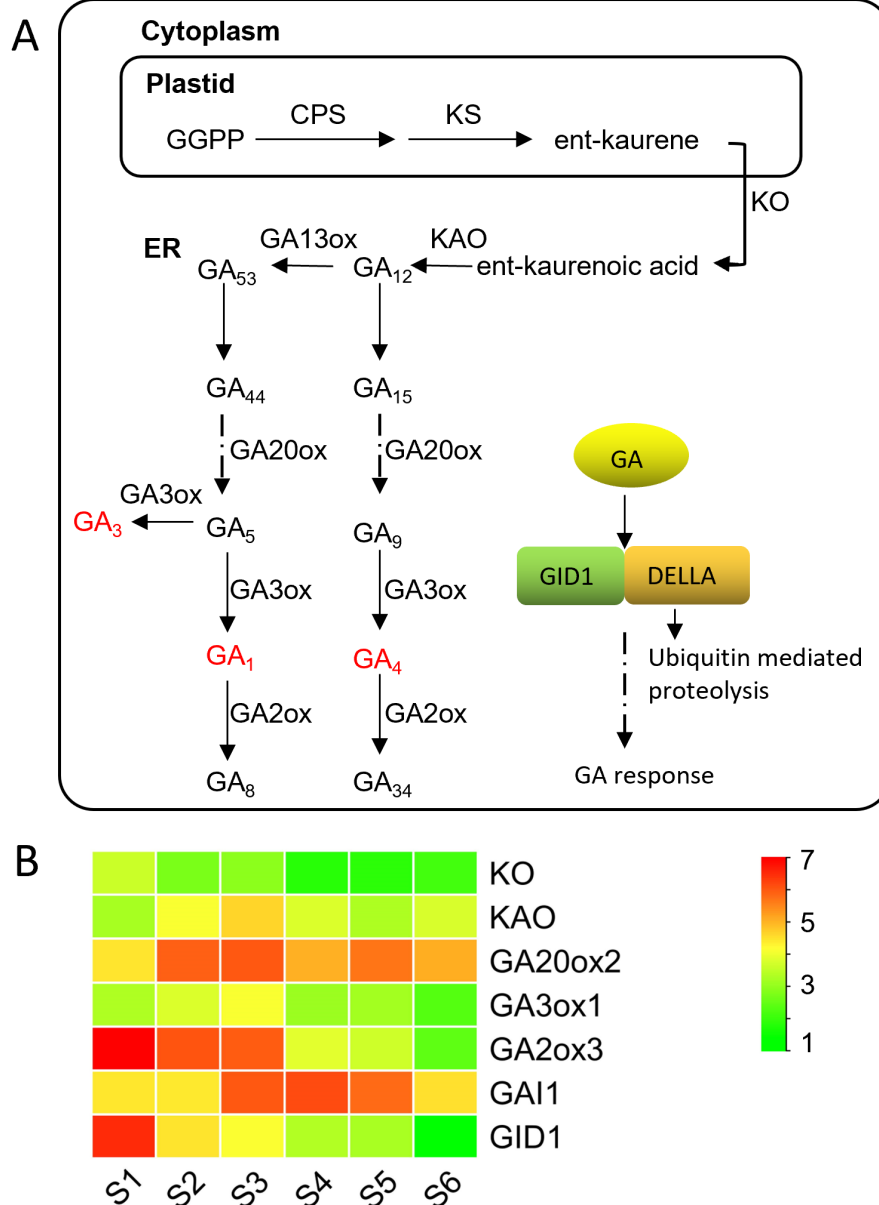

**Figure S3.** Analysis of DEGs related to gibberellin during tuber expansion. (A) Gibberellin synthesis and signal transduction pathway; (B) Heatmap analysis of gibberellin synthesis and signal transduction related genes.

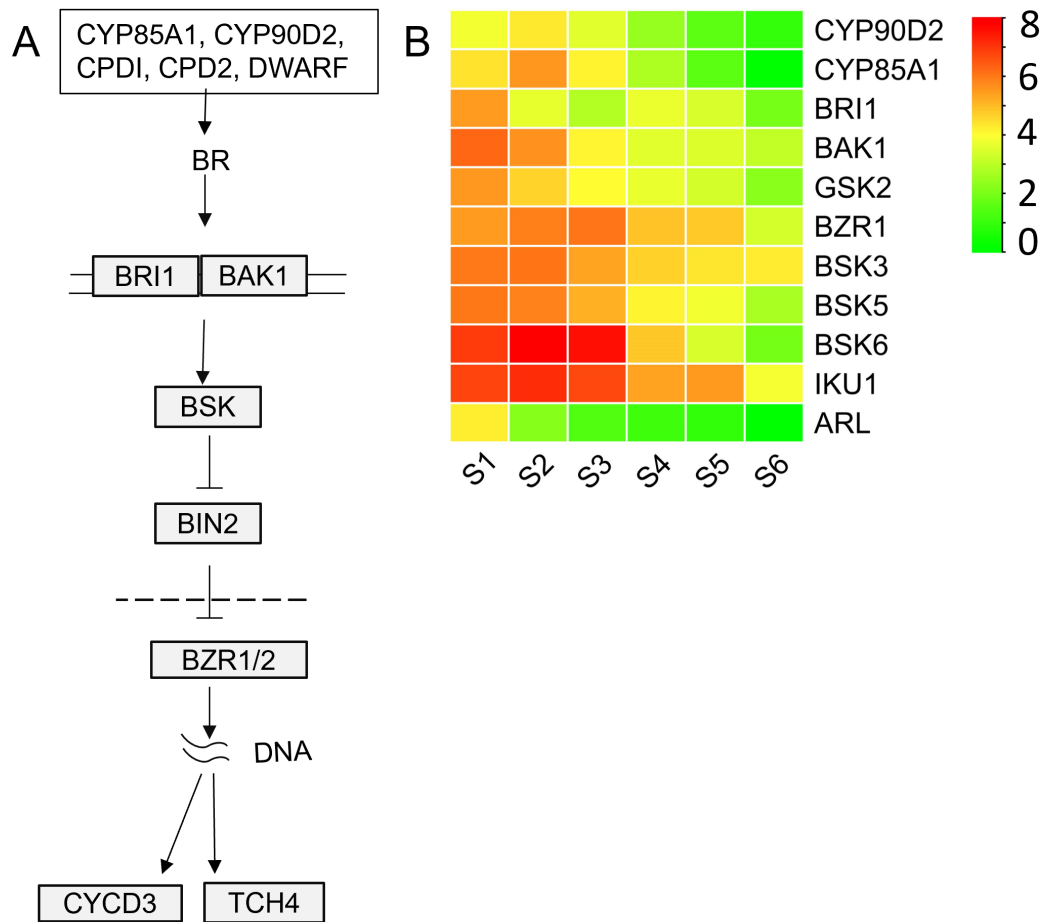

**Figure S4.** Analysis of DEGs related to brassinosteroid during tuber expansion. (A) Brassinosteroid synthesis and signal transduction pathway; (B) Heatmap analysis of brassinosteroid synthesis and signal transduction related genes.

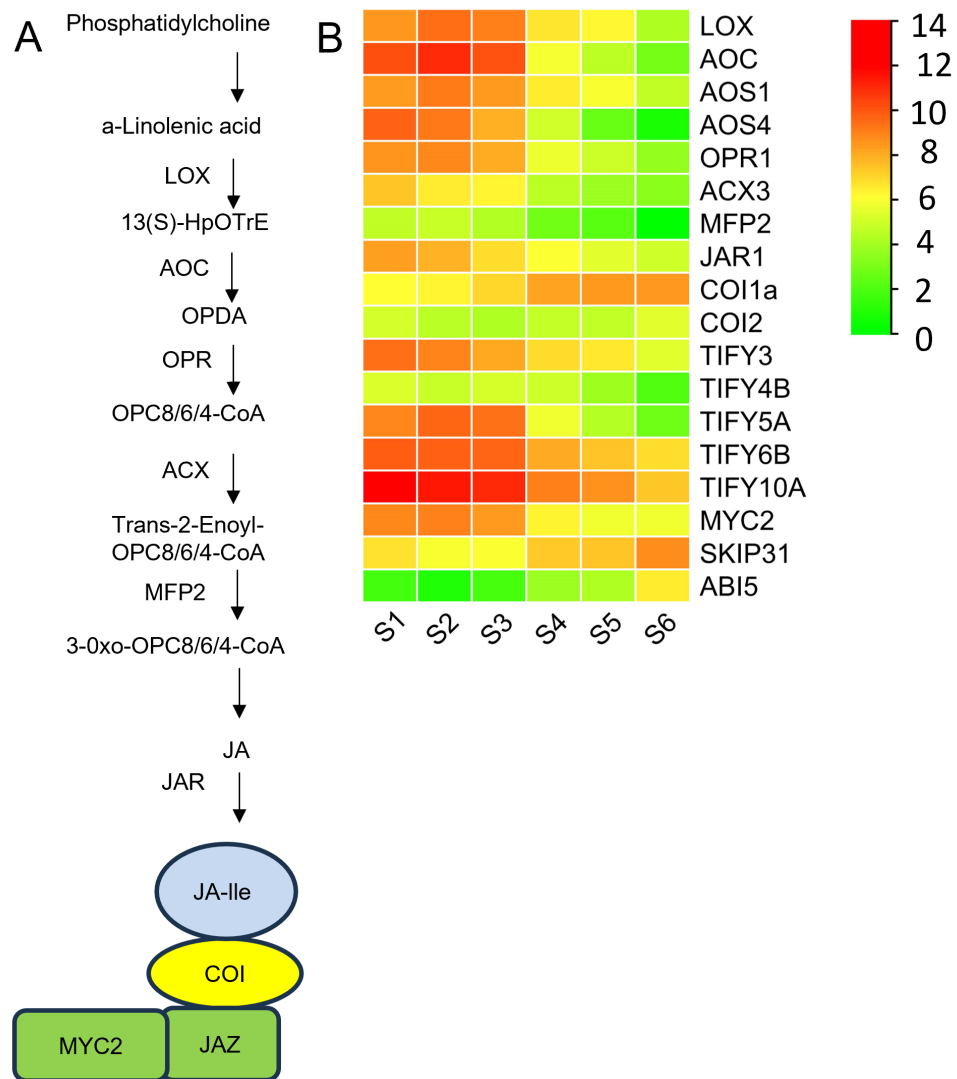

**Figure S5.** Analysis of DEGs related to jasmonic acid during tuber expansion. (A) Jasmonic acid synthesis and signal transduction pathway; (B) Heatmap analysis of jasmonic acid synthesis and signal transduction related genes.

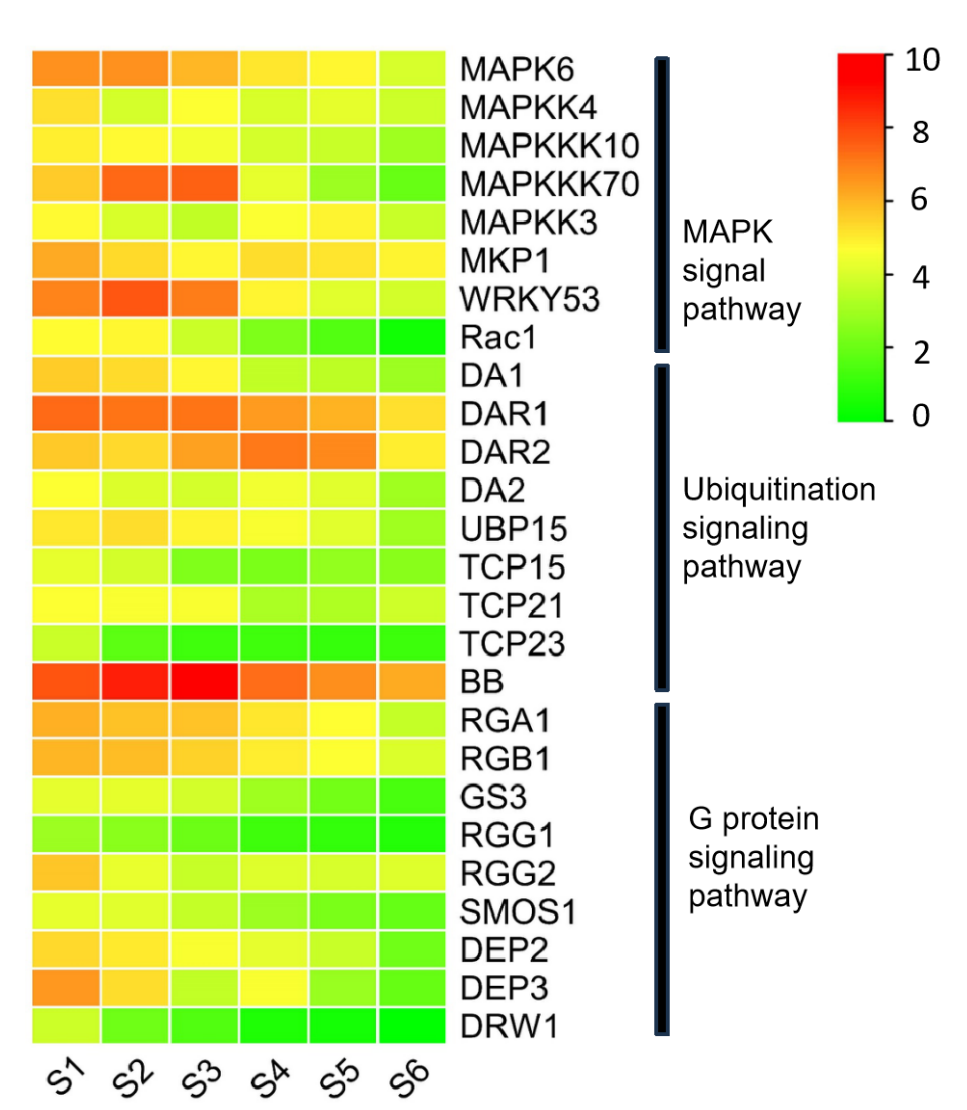

**Figure S6.** Heat map analysis of transcriptional regulation related DEGs.

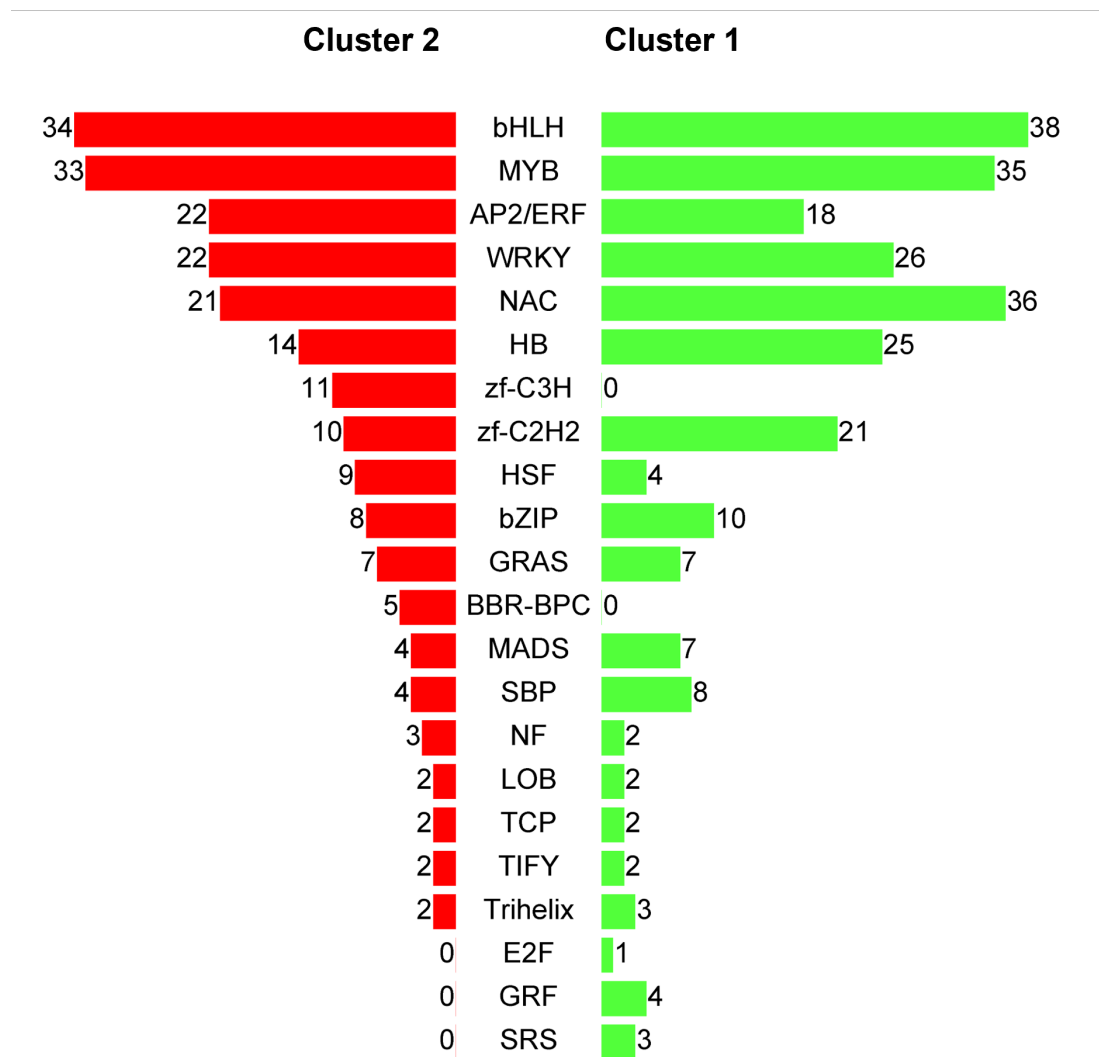

**Figure S7.** Differential expression of transcription factors during tuber expansion.
