# Supplementary material for: RNA-Seq Reveals That Multiple Pathways Are Involved in Tuber Expansion in Tiger Nuts (Cyperus esculentus L.)
Source: Int J Mol Sci. 2024 May 7;25(10):5100. doi: 10.3390/ijms25105100 (PMC11121407; doi:10.3390/ijms25105100)
Supplement: Supplementary file 1 [file ijms-25-05100-s001.zip › Supplementary Tables.xlsx]

## Sheet: Table S1
Table S1. Sequencing data assessment.
Samples	Read Number	Base Number	GC(%)	Q20(%)	Q30(%)
B63-S1-1	22617524	6768074846	48.65	98.16	94.82
B63-S1-2	25313389	7576378494	49.04	98.11	94.64
B63-S1-3	25196058	7541748838	49.15	98.16	94.76
B63-S2-1	25249432	7554312776	49.21	98	94.44
B63-S2-2	27129820	8121385272	49.09	98.06	94.5
B63-S2-3	22040730	6596715324	49.19	98.04	94.49
B63-S3-1	24391694	7301212592	49.44	98.11	94.66
B63-S3-2	25819958	7727757124	49.25	97.94	94.25
B63-S3-3	23342587	6985888200	49.21	98.31	95.14
B63-S4-1	19919584	5962394604	49.3	98.1	94.57
B63-S4-2	23316995	6978576734	49.77	98.14	94.78
B63-S4-3	29197659	8738453258	49.27	98.04	94.48
B63-S5-1	26098438	7811182070	49.63	98.11	94.62
B63-S5-2	21380421	6398790258	49.63	98.07	94.59
B63-S5-3	24857176	7438385658	49.85	98.09	94.63
B63-S6-1	20260379	6062472358	49.57	97.69	93.73
B63-S6-2	25490444	7630849976	49.78	98.15	94.77
B63-S6-3	25140086	7525276198	49.66	98.04	94.51
Note: Samples: Sample name;Read Number: total number of pair-end reads in clean data;Base Number: total number of bases in clean data;GC Content: GC content in clean data, i.e. percentage of G and C in clean data;%≥Q30: percentage of bases with quality score ≥Q30.
Sequencing quality analysis

## Sheet: Table S2
Table S2. Clusters of DEGs.
Table S2A. DEGs in Cluster 1 Table S2B. DEGs in Cluster 2 Table S2C. DEGs in Cluster 3 Table S2D. DEGs in Cluster 4
Table S2A. DEGs in Cluster 1									Table S2B. DEGs in Cluster 2									Table S2C. DEGs in Cluster 3									Table S2D. DEGs in Cluster 4
GeneID	Annotation	S1	S2	S3	S4	S5	S6		GeneID	Annotation	S1	S2	S3	S4	S5	S6		GeneID	Annotation	S1	S2	S3	S4	S5	S6		GeneID	Annotation	S1	S2	S3	S4	S5	S6
Ce000000Fg1	CMP-sialic acid transporter 4 [Ananas comosus]	24.2268	20.143	10.3983	6.71228	5.07589	3.16197		Ce000000Fg131	Ppx/GppA phosphatase [Corchorus capsularis]	0.972396	43.5137	42.5209	12.8292	15.0935	1.32358		Ce000000Fg109	mitogen-activated protein kinase kinase 3 isoform X3 [Carex littledalei]	26.3055	15.1344	10.6997	24.1823	28.5692	12.1709		Ce000000Fg107	hypothetical protein TEA_009026 [Camellia sinensis var. sinensis]	7.60862	11.516	20.1515	53.2595	74.3182	190.692
Ce000000Fg100	vacuolar protein sorting-associated protein 20 homolog 2-like isoform X1 [Arachis duranensis]	43.6636	39.4423	39.2804	21.9233	20.5451	16.2008		Ce000000Fg132		2.07701	42.9301	43.3484	12.8276	17.6558	1.62495		Ce000000Fg142	elongation factor Tu [Carex littledalei]	26.1496	53.7355	66.7838	83.3208	80.2473	52.865		Ce000000Fg115	cytochrome P450 71A9-like protein [Carex littledalei]	7.23878	8.83099	12.1226	23.9155	27.0086	68.3342
Ce000000Fg101	uncharacterized protein LOC109726209 [Ananas comosus]	40.5677	24.0738	20.4792	16.5025	14.8087	10.5704		Ce000000Fg133	--	2.03306	33.9551	32.5454	10.6715	13.2498	1.26274		Ce000000Fg143	elongation factor Tu [Carex littledalei]	54.0985	108.262	136.65	175.369	162.84	79.1056		Ce000000Fg141	general transcription factor IIH subunit 5 [Carex littledalei]	22.5144	22.4164	26.5711	60.0864	69.4286	90.7759
Ce000000Fg103	hypothetical protein B296_00050828 [Ensete ventricosum]	95.7189	72.0435	41.6212	23.409	19.3322	4.73457		Ce000000Fg140	Plant specific eukaryotic initiation factor 4B [Carex littledalei]	65.1198	88.5443	105.459	53.6555	35.6262	20.5159		Ce000000Fg168	hypothetical protein FCM35_KLT18612 [Carex littledalei]	295.145	494.071	706.366	716.284	682.157	434.286		Ce000000Fg148	stress response protein NST1-like protein [Carex littledalei]	62.961	29.473	35.5056	121.217	112.44	140.758
Ce000000Fg116	serine/threonine-protein kinase AFC2 isoform X1 [Carex littledalei]	120.517	101.879	78.544	63.4346	51.9118	52.0286		Ce000000Fg159	BTB/POZ domain-containing protein [Carex littledalei]	51.7466	55.2621	41.7543	22.5509	17.945	8.84064		Ce000000Fg178	protein FRA10AC1 isoform X1 [Carex littledalei]	9.02396	3.50492	6.21548	15.7603	19.8105	16.1877		Ce000000Fg163	LETM1 and EF-hand domain-containing protein 1 [Carex littledalei]	6.08615	1.74275	4.96407	12.4112	20.0048	26.1039
Ce000000Fg139	glutamine--fructose-6-phosphate aminotransferase [Carex littledalei]	35.3887	27.8196	16.1815	10.6499	12.3151	6.09255		Ce000000Fg169	plant intracellular Ras-group-related LRR protein 3-like protein [Carex littledalei]	64.8571	63.5683	67.6836	43.3961	36.1707	28.4468		Ce000000Fg193	--	2.42716	0.80274	2.3677	7.37196	5.62303	0.912989		Ce000000Fg166	DNA-directed RNA polymerase I subunit rpa49 isoform X3 [Dendrobium catenatum]	27.1006	66.1414	100.511	58.9115	61.7681	156.055
Ce000000Fg145	isocitrate dehydrogenase [Carex littledalei]	37.4798	36.2852	28.0618	13.27	14.4613	8.95005		Ce000000Fg192	uncharacterized protein LOC103700406 isoform X1 [Phoenix dactylifera]	65.8192	66.2857	56.3599	23.1818	16.1382	5.0693		Ce000000Fg201	dicarboxylate transporter 1 [Carex littledalei]	20.6479	65.0825	60.581	80.5502	73.1784	18.1802		Ce000000Fg167	protein RST1 isoform X1 [Carex littledalei]	7.47833	15.9351	23.2929	15.6744	18.1664	38.1904
Ce000000Fg147	hypothetical protein FCM35_KLT18601 [Carex littledalei]	23.8246	10.7339	7.36049	8.15799	7.05384	5.97767		Ce000000Fg23	protoporphyrinogen oxidase [Carex littledalei]	10.9419	20.8879	46.0442	25.757	26.1558	14.7161		Ce000000Fg251	F-box/kelch-repeat protein [Carex littledalei]	0.275662	0.276327	0.806267	4.85461	6.32263	2.40634		Ce000000Fg176	hypothetical protein FCM35_KLT18668 [Carex littledalei]	11.4919	5.51013	11.4535	42.7068	43.2149	58.0356
Ce000000Fg15	4-hydroxy-3-methylbut-2-en-1-yl diphosphate synthase [Carex littledalei]	129.497	34.2854	37.4946	16.5201	14.5247	13.4857		Ce000000Fg239	peptidyl-prolyl cis-trans isomerase CYP23 [Carex littledalei]	14.2739	17.6195	14.3581	7.50272	6.54825	5.02362		Ce000000Fg254	protein MITOFERRINLIKE 1 [Carex littledalei]	6.14127	6.63354	7.26437	12.8752	12.3031	11.9718		Ce000000Fg183	hypothetical protein FCM35_KLT18620 [Carex littledalei]	7.21327	4.15068	6.89791	24.4586	30.7039	80.6488
Ce000000Fg157	Serine/threonine-protein kinase HT1 [Carex littledalei]	93.7653	73.7004	43.134	47.8548	43.2166	42.5289		Ce000000Fg240	hypothetical protein Lal_00047361 [Lupinus albus]	59.4538	60.8545	54.8516	35.2735	29.1262	13.8668		Ce000000Fg32	GTP-binding protein [Carex littledalei]	4.61158	5.93234	6.68532	13.3491	16.1726	9.32942		Ce000000Fg191	ATP-dependent 6-phosphofructokinase 2-like protein [Carex littledalei]	11.4222	10.1942	18.3462	46.0038	82.8185	105.154
Ce000000Fg186	oligosaccharyltransferase complex subunit [Carex littledalei]	48.1707	38.989	35.5937	23.4192	23.0441	18.5488		Ce000000Fg272	hypothetical protein BHE74_00043847 [Ensete ventricosum]	15.9448	56.7323	52.8402	30.3542	21.117	4.98305		Ce000000Fg338	polyol transporter 5-like protein [Carex littledalei]	6.53025	13.8813	15.9594	52.918	30.5835	17.5543		Ce000000Fg197	heat shock protein 83-like protein [Carex littledalei]	45.2522	34.6323	56.3203	89.862	88.0833	96.0611
Ce000000Fg187	hypothetical protein HYC85_021375 [Camellia sinensis]	53.7329	45.1493	41.6935	32.937	28.2487	23.2318		Ce000000Fg276	phosphoserine phosphatase [Carex littledalei]	25.7153	34.4387	33.8449	16.8878	13.8574	12.0252		Ce000000Fg346	GTPase HflX [Vitis vinifera]	2.5569	3.4074	4.67007	5.33962	5.66518	3.20519		Ce000000Fg199	GTPase Der [Carex littledalei]	2.52645	5.59003	5.73195	18.3186	12.1052	16.3043
Ce000000Fg202	syntaxin-61-like protein [Carex littledalei]	18.6547	15.1442	13.0263	6.60193	6.97151	4.79419		Ce000000Fg357	protein WVD2-like 1 [Carex littledalei]	49.2611	84.9662	50.3805	18.7128	12.1337	4.29959		Ce000000Fg387	--	0.0594687	0.0649233	0.032465	24.5245	102.488	30.0378		Ce000000Fg235	ABC transporter F family member 5-like protein [Carex littledalei]	9.62459	3.01973	6.81973	30.1125	49.9688	196.138
Ce000000Fg209	GRF1-interacting factor 2-like protein [Carex littledalei]	33.9741	20.2749	16.9789	13.726	10.7933	12.86		Ce000000Fg360	chloroplastic group IIA intron splicing facilitator CRS1 [Carex littledalei]	7.43375	15.5071	21.5412	7.17964	5.80618	4.56515		Ce000000Fg438	14-3-3-like protein [Carex littledalei]	194.824	237.523	246.595	483.654	306.667	157.672		Ce000000Fg236		5.92809	1.45187	3.58329	16.8666	30.2922	88.6677
Ce000000Fg224	acyl-coenzyme A oxidase 2 [Carex littledalei]	56.2082	33.1703	27.4373	4.67352	1.99042	1.40909		Ce000000Fg373	hypothetical protein FCM35_KLT18749 [Carex littledalei]	14.121	84.3748	71.6891	27.786	17.1917	6.25657		Ce000000Fg50	glyceraldehyde-3-phosphate dehydrogenase 2, cytosolic-like protein [Carex littledalei]	1242.19	2122.03	3251.96	3559.67	3406.07	1474.34		Ce000000Fg237		2.18442	2.48894	3.13006	3.292	2.53575	9.04372
Ce000000Fg231	putative pumilio -like protein 1-like [Capsicum annuum]	12.9498	7.59012	6.37607	4.2348	4.0339	2.97116		Ce000000Fg419	Protein WAVE-DAMPENED 2 [Carex littledalei]	195.984	328.869	384.386	233.188	133.494	33.244		Ce000000Fg97	peptide methionine sulfoxide reductase-like protein [Carex littledalei]	47.1414	45.0274	43.6917	174.441	149.714	69.795		Ce000000Fg247	Cyclin-D1-binding protein 1 [Carex littledalei]	4.43931	3.03242	4.71207	12.4183	14.9879	22.9738
Ce000000Fg257	Glycine-rich domain-containing protein 1 [Carex littledalei]	33.7196	26.6103	17.1583	12.8775	18.5121	29.9146		Ce000000Fg432	ultraviolet-B receptor UVR8 [Carex littledalei]	22.7683	29.9664	27.9589	14.1046	13.1053	10.8682		Ce000001Fg152	putative protein phosphatase 2C 8 [Carex littledalei]	7.95523	18.7595	23.4973	25.5128	34.4094	11.0279		Ce000000Fg256	Oligouridylate-binding protein 1 [Vitis vinifera]	49.1053	44.1197	47.3974	73.8942	78.2622	98.074
Ce000000Fg267	hypothetical protein FCM35_KLT18686 [Carex littledalei]	15.1511	12.5648	7.94731	6.19357	6.91832	2.51965		Ce000000Fg433	eukaryotic peptide chain release factor subunit 1-3 [Carex littledalei]	244.142	274.752	260.078	167.892	88.1565	59.198		Ce000001Fg164	hypothetical protein FCM35_KLT15818 [Carex littledalei]	151.361	59.1573	138.702	315.926	190.368	115.76		Ce000000Fg275	hypothetical protein FCM35_KLT18693 [Carex littledalei]	5.52244	5.04449	4.59365	8.02757	7.24334	12.1994
Ce000000Fg273	protein SPIRAL1-like 1 [Carex littledalei]	36.753	32.5397	26.9415	17.262	15.7422	21.633		Ce000000Fg440	putative LOV domain-containing protein [Cyperus papyrus]	5.32839	14.0405	30.2259	20.7218	11.5645	10.2003		Ce000001Fg174	Dual-specificity RNA methyltransferase RlmN [Carex littledalei]	4.32624	4.80789	4.68953	8.05253	8.92828	5.71917		Ce000000Fg313	histone deacetylase 6 isoform X1 [Carex littledalei]	4.5173	3.5511	4.06652	6.66289	8.10071	13.0746
Ce000000Fg274	3-ketoacyl-CoA synthase 1 [Carex littledalei]	29.7822	10.5663	5.29817	4.91313	2.25039	0.207313		Ce000000Fg52	glucose-6-phosphate 1-dehydrogenase [Carex littledalei]	98.8429	128.988	137.247	92.4655	71.3423	39.5093		Ce000001Fg218	glucose-1-phosphate adenylyltransferase large subunit 1-like isoform X1 [Carex littledalei]	65.6762	829.597	1548.86	6157.89	7289.68	4347.79		Ce000000Fg379	protein LIFEGUARD 4-like [Nymphaea colorata]	0	0	0	0.0176297	0.428341	11.7238
Ce000000Fg334	cationic amino acid transporter 9 [Carex littledalei]	17.5959	9.39613	6.04855	4.12618	4.65232	2.9984		Ce000000Fg81	putative membrane protein [Dichanthelium oligosanthes]	14.3438	35.0205	28.5871	19.0614	19.9471	12.0549		Ce000001Fg220	50S ribosomal protein L31, chloroplastic [Phoenix dactylifera]	2.49153	4.02568	5.71938	11.7615	14.8216	10.474		Ce000000Fg392	unknown [Zea mays]	32.509	5.49548	9.56745	22.9204	22.7149	23.6981
Ce000000Fg34	probable inactive receptor kinase At1g27190 [Setaria viridis]	22.0162	14.3787	11.4655	11.9256	11.037	5.87807		Ce000001Fg122	common plant regulatory factor 1-like protein [Carex littledalei]	47.4646	108.296	113.062	56.2303	43.4689	21.5406		Ce000001Fg312	beta carbonic anhydrase 2 [Carex littledalei]	13.2989	1.82237	1.8377	10.0867	170.408	43.3145		Ce000000Fg42	malate synthase [Carex littledalei]	4.43945	4.90618	3.59735	6.37928	9.22472	10.7992
Ce000000Fg343	OBERON-like protein isoform X1 [Carex littledalei]	53.4872	48.1384	37.8589	22.0665	18.7399	15.764		Ce000001Fg132	jacalin-related lectin 19-like protein [Carex littledalei]	94.2842	386.895	436.132	15.7916	18.8791	0.790087		Ce000001Fg375	transcriptional corepressor LEUNIG-like protein, partial [Eleocharis dulcis]	20.3712	34.5665	51.9138	43.5243	27.96	37.0455		Ce000000Fg443	unnamed protein product [Ananas comosus var. bracteatus]	5.52071	0.62505	0.322064	1.32178	11.4581	17.6331
Ce000000Fg368	3-ketoacyl-CoA synthase 11-like protein [Carex littledalei]	28.8199	10.8614	10.4663	10.8619	7.08519	1.75832		Ce000001Fg134	hypothetical protein FCM35_KLT15853 [Carex littledalei]	59.3904	93.8039	94.9033	20.4653	20.4038	12.2525		Ce000002Fg174	molybdopterin biosynthesis protein CNX1 isoform X1 [Carex littledalei]	41.3359	49.1703	44.4647	100.909	85.7088	65.1207		Ce000000Fg49	39S ribosomal protein L47 [Carex littledalei]	16.5317	11.2124	13.5516	25.5399	31.6647	67.5386
Ce000000Fg402	ubiquitin carboxyl-terminal hydrolase 12 isoform X7 [Carex littledalei]	44.5669	39.8403	33.2399	28.2313	21.3968	32.7052		Ce000001Fg137	Werner Syndrome-like exonuclease [Oryza sativa Japonica Group]	16.4643	19.378	16.8099	10.7043	7.42578	1.76928		Ce000002Fg177	F-box protein [Carex littledalei]	37.8756	20.3946	47.5308	155.158	126.853	117.987		Ce000000Fg61	elongator complex protein 3 [Carex littledalei]	21.7439	15.3991	17.4396	38.0458	36.08	51.4691
Ce000000Fg404	F-box protein [Carex littledalei]	14.0498	6.74371	8.88447	6.24192	6.16469	2.48759		Ce000001Fg163	long chain base biosynthesis protein 1b isoform X1 [Carex littledalei]	35.544	37.9068	29.229	11.4818	10.9529	6.63922		Ce000002Fg179	Tetratricopeptide repeat [Carex littledalei]	28.9572	33.0668	38.0456	62.3212	57.7535	60.2434		Ce000000Fg64	AP2-like ethylene-responsive transcription factor ANT [Carex littledalei]	2.12356	0.233935	1.17025	3.57873	2.91459	8.51135
Ce000000Fg421	hypothetical protein FCM35_KLT22307 [Carex littledalei]	78.1131	72.0676	39.0129	36.022	30.2384	43.3738		Ce000001Fg172	Serine/threonine-protein kinase HT1 [Carex littledalei]	17.1197	39.4994	43.69	12.6519	10.8906	5.64094		Ce000002Fg247	uncharacterized protein LOC109705144 [Ananas comosus]	13.4472	7.1073	5.48639	15.0064	13.2716	6.88522		Ce000000Fg79	dentin sialophosphoprotein-like isoform X2 [Carex littledalei]	10.6728	6.71328	9.01195	15.8874	13.9765	23.0452
Ce000000Fg424	methylcrotonoyl-CoA carboxylase beta chain [Carex littledalei]	47.4138	59.7556	24.2686	9.35213	7.86988	16.5625		Ce000001Fg18	hypothetical protein ACMD2_26294 [Ananas comosus]	95.0191	258.153	301.668	75.0141	89.4008	173.367		Ce000002Fg317		13.6443	6.42981	10.4166	28.1239	16.817	13.8371		Ce000000Fg85	Programmed cell death protein 4 [Carex littledalei]	58.1392	46.3979	42.2519	128.258	182.011	275.099
Ce000000Fg429	dr1-associated corepressor isoform X2 [Carex littledalei]	48.5517	34.8014	26.9165	33.8547	30.2935	20.4707		Ce000001Fg191	hypothetical protein FCM35_KLT21817 [Carex littledalei]	18.4425	38.1659	50.0102	8.61763	7.172	3.77583		Ce000002Fg34		15.2513	8.02203	6.0437	16.9601	10.8131	11.224		Ce000000Fg93	60S ribosomal protein L2, mitochondrial-like [Setaria viridis]	58.8403	44.2328	22.4373	47.4215	64.9106	113.628
Ce000000Fg442	probable LRR receptor-like serine/threonine-protein kinase At1g07650 isoform X3 [Setaria italica]	55.4181	52.0998	17.5899	10.5746	8.10459	8.38926		Ce000001Fg194	cinnamoyl-CoA reductase 2-like isoform X1 [Carex littledalei]	8.92595	11.3088	17.793	18.1357	7.33181	4.19432		Ce000002Fg350	hypothetical protein FCM35_KLT16238 [Carex littledalei]	1.51882	1.33157	2.87371	7.12174	5.83126	4.01549		Ce000000Fg96	hypothetical protein FCM35_KLT11861 [Carex littledalei]	11.1839	6.23579	7.71613	18.5772	23.8072	27.7093
Ce000000Fg54	Serine/threonine protein [Carex littledalei]	34.7652	20.8023	16.0239	16.4545	16.4114	12.8229		Ce000001Fg204	hypothetical protein DY000_02057371 [Brassica cretica]	117.033	99.9257	158.569	45.3317	56.7128	101.845		Ce000003Fg110	Alpha/beta hydrolase domain-containing protein 11 [Carex littledalei]	8.34893	19.388	24.1299	50.0951	43.5018	24.4121		Ce000001Fg104	paramyosin-like protein [Carex littledalei]	12.8513	10.7872	20.5145	70.8717	78.5312	87.2574
Ce000000Fg75	myosin-11-like protein [Carex littledalei]	18.13	16.859	11.4221	6.00291	5.06506	5.6305		Ce000001Fg317	hypothetical protein FCM35_KLT21484 [Carex littledalei]	5.58837	13.8884	8.1981	0.348611	0.248134	0		Ce000003Fg146	F-box protein SKP2A [Zea mays]	162.372	345.516	407.81	861.155	530.834	371.688		Ce000001Fg124		2.66966	0.223486	0.530977	15.3366	37.9729	57.3213
Ce000000Fg77	very-long-chain 3-oxoacyl-CoA reductase 1 [Carex littledalei]	94.0783	64.2834	55.1463	38.3276	32.1455	19.4237		Ce000001Fg339	bidirectional sugar transporter SWEET6a-like protein [Carex littledalei]	30.5107	107.793	50.5129	10.9676	6.88784	1.66965		Ce000003Fg200	DnaJ subfamily B member 4 [Carex littledalei]	34.2372	26.0352	215.791	653.342	678.631	213.744		Ce000001Fg201	iron-sulfur cluster assembly protein 1-like protein [Carex littledalei]	24.4775	12.0749	24.5154	47.8337	60.0539	66.293
Ce000000Fg8	serine/threonine-protein kinase OXI1-like protein [Carex littledalei]	19.7967	13.9916	10.398	8.69655	6.21507	1.56189		Ce000001Fg369	dnaJ subfamily C member 11-like protein [Carex littledalei]	3.70196	107.355	323.81	7.48259	13.3851	29.0599		Ce000003Fg23	kxDL motif-containing protein 1 isoform X2 [Elaeis guineensis]	1.67489	1.38708	1.97505	4.9747	7.49089	5.62556		Ce000001Fg209	PREDICTED: uncharacterized protein LOC105036880 [Elaeis guineensis]	0.162037	0.336796	0.988251	1.43651	3.24403	11.2805
Ce000001Fg154	unnamed protein product, partial [Nymphaea colorata]	166.802	114.228	124.468	109.74	71.2172	55.2363		Ce000001Fg385	inactive receptor kinase [Carex littledalei]	17.7787	49.8175	29.6021	3.68592	1.49976	0.264068		Ce000003Fg254	serine/threonine-protein kinase SRK2A-like isoform X1 [Quercus suber]	52.5328	58.1049	121.468	107.334	134.744	106.213		Ce000001Fg257	hypothetical protein OsJ_27379 [Oryza sativa Japonica Group]	61.9017	44.2845	49.828	96.7781	124.445	180.662
Ce000001Fg165	putative isoprenylcysteine alpha-carbonyl methylesterase ICMEL1 [Morella rubra]	23.6621	13.1323	10.7321	6.01347	4.94556	17.0612		Ce000001Fg405_Ce000001Fg406	hypothetical protein GQ55_9G208400 [Panicum hallii var. hallii]	2.77715	6.37083	4.18354	0.430649	0.108882	0.0376433		Ce000003Fg255	Filament-like plant protein 3 [Carex littledalei]	9.26261	16.825	21.7983	41.4121	51.8383	18.0298		Ce000001Fg269	Katanin p60 ATPase-containing subunit A1 [Carex littledalei]	4.66222	2.34106	4.37221	12.0642	15.1731	15.0225
Ce000001Fg167	calcium-binding protein CML14 [Carex littledalei]	19.0587	9.39793	3.33413	3.16494	2.18581	2.52674		Ce000001Fg44	Integral membrane protein DUF92 [Carex littledalei]	5.55809	11.2597	7.58968	4.27086	4.32406	1.42108		Ce000003Fg264	hypothetical protein B296_00046443 [Ensete ventricosum]	56.597	94.7003	133.183	269.058	264.48	102.494		Ce000001Fg275	zinc finger protein zpr1-like protein [Carex littledalei]	13.339	11.2284	22.6302	11.6182	14.1735	34.7657
Ce000001Fg216	hypothetical protein FCM35_KLT09426 [Carex littledalei]	72.0999	41.8639	24.5517	15.3673	10.2332	4.02344		Ce000001Fg45	protein TOO MANY MOUTHS [Carex littledalei]	11.4083	24.7064	8.633	1.82372	1.35751	0.169937		Ce000003Fg278	sterol 3-beta-glucosyltransferase UGT80B1 [Carex littledalei]	13.5796	16.9985	17.8516	47.5342	39.1406	25.9586		Ce000001Fg30	Protein FAR1-RELATED SEQUENCE 5 [Carex littledalei]	15.0482	9.04918	7.10112	12.5957	12.7448	11.5918
Ce000001Fg222	aspartic proteinase oryzasin-1-like protein [Carex littledalei]	376.307	92.7581	109.433	74.6485	57.0314	122.729		Ce000001Fg48	SNF1-related protein kinase catalytic subunit alpha KIN10 [Dichanthelium oligosanthes]	28.6957	27.6205	30.1872	20.9312	19.6249	10.4894		Ce000003Fg282	Transcription termination factor 3 [Carex littledalei]	3.54166	4.01796	5.172	14.2232	14.1002	9.26112		Ce000001Fg307	pentatricopeptide repeat-containing protein [Carex littledalei]	7.23003	2.54115	5.14854	21.8374	25.0214	58.8312
Ce000001Fg227	Peptidase of plants and bacteria [Carex littledalei]	44.5574	16.7588	3.00016	0.0501143	0.139521	0		Ce000001Fg76	methylenetetrahydrofolate reductase 2-like protein [Carex littledalei]	55.6106	49.1218	54.1923	25.896	21.8588	14.3013		Ce000003Fg286	Protein BOLA2 [Carex littledalei]	13.875	7.37498	10.0829	12.3192	13.9019	6.79872		Ce000001Fg374	tyrosine--tRNA ligase 1, cytoplasmic [Cinnamomum micranthum f. kanehirae]	50.9927	56.9419	67.8106	111.586	57.3865	194.029
Ce000001Fg233	CAS1 domain-containing protein 1-like protein [Carex littledalei]	26.0901	19.0707	12.7113	7.61374	6.52651	2.98192		Ce000001Fg81	respiratory burst oxidase protein B [Carex littledalei]	37.9805	53.6821	42.6081	23.4272	12.0726	4.18579		Ce000003Fg305	F-box protein AFR [Carex littledalei]	8.31991	21.417	52.0101	67.0278	80.7795	21.9086		Ce000001Fg378	pre-mRNA-splicing factor SYF1-like protein [Carex littledalei]	14.1761	10.0857	12.2361	12.3575	10.2646	39.5261
Ce000001Fg240	Mitogen-activated protein kinase 10 [Nymphaea thermarum]	68.0524	50.4149	48.4974	31.6186	15.2245	7.99903		Ce000001Fg84	uncharacterized protein LOC113278897 [Papaver somniferum]	134.635	187.554	248.112	56.5354	24.5346	4.09175		Ce000003Fg76	hypothetical protein FCM35_KLT04723 [Carex littledalei]	5.051	4.95377	22.3599	20.208	14.3793	9.98257		Ce000001Fg39	hypothetical protein FCM35_KLT07090 [Carex littledalei]	12.0238	11.9305	9.54822	14.6935	11.0593	24.2182
Ce000001Fg242	adenylate kinase [Actinidia chinensis var. chinensis]	72.9507	53.6507	48.6711	39.5023	28.594	33.6037		Ce000001Fg85	Os10g0351414 [Oryza sativa Japonica Group]	138.842	195.337	254.121	56.9173	23.4286	2.35301		Ce000003Fg95	hypothetical protein FCM35_KLT04711 [Carex littledalei]	34.0788	55.1474	83.5046	195.293	186.591	115.541		Ce000001Fg42	hypothetical protein FCM35_KLT07094 [Carex littledalei]	2.32261	0.846461	1.53022	23.8502	35.1688	45.1226
Ce000001Fg245	CTD small [Carex littledalei]	12.9296	13.015	11.0491	6.85504	6.00657	5.78695		Ce000001Fg86	uncharacterized protein LOC115665883, partial [Syzygium oleosum]	124.689	171.917	217.302	48.9068	17.7847	2.32121		Ce000004Fg11	beta-amylase-like protein [Carex littledalei]	2.39916	5.28788	5.11262	13.9763	14.9307	5.32565		Ce000001Fg68	Dynein heavy chain-like protein [Carex littledalei]	1.61087	0.797305	1.66962	5.38316	4.55358	5.48882
Ce000001Fg259	ATP synthase subunit beta [Carex littledalei]	243.996	189.834	172.218	108.579	105.575	84.8828		Ce000001Fg87	uncharacterized protein LOC118348906 [Juglans regia]	140.359	191.919	240.712	57.0285	19.1993	2.04941		Ce000004Fg128	AMSH-like ubiquitin thioesterase 2 isoform X1 [Carex littledalei]	13.7018	17.2491	18.5394	29.1676	32.0234	27.1076		Ce000002Fg116	ribosome production factor 2 [Carex littledalei]	20.6791	8.21123	10.051	53.3402	40.603	101.915
Ce000001Fg264	ER membrane protein complex subunit 6-like protein [Carex littledalei]	32.1522	29.3938	25.5765	17.8438	17.0908	14.9083		Ce000001Fg88	uncharacterized protein LOC115695429 [Cannabis sativa]	151.57	223.467	266.519	67.1801	30.2348	5.9003		Ce000004Fg186	serine carboxypeptidase-like 50 [Carex littledalei]	8.53396	7.92376	6.98893	19.1786	21.3995	6.74919		Ce000002Fg119	hypothetical protein FCM35_KLT18956 [Carex littledalei]	12.286	6.89698	5.91947	9.58972	9.09929	10.4735
Ce000001Fg278	serine/threonine protein phosphatase 2A regulatory subunit B' iota isoform-like protein [Carex littledalei]	17.9432	9.87265	6.46437	5.67143	4.64662	1.09825		Ce000001Fg90	Anthocyanidin [Carex littledalei]	2.69273	9.3171	13.8133	1.1984	0.561115	0.038855		Ce000004Fg205	50S ribosomal protein L31, chloroplastic [Phoenix dactylifera]	2.97795	5.53348	6.3077	12.2542	11.6536	9.93092		Ce000002Fg124	hypothetical protein FCM35_KLT18948 [Carex littledalei]	3.73068	4.35889	7.25683	14.0221	19.9867	18.9491
Ce000001Fg346	chalcone--flavonone isomerase [Carex littledalei]	76.5058	33.3844	15.7157	6.30396	4.14844	1.49932		Ce000001Fg93	Anthocyanidin [Carex littledalei]	3.89012	8.36344	4.97335	0.1473	0.114971	0.0149367		Ce000004Fg206	glucose-1-phosphate adenylyltransferase large subunit 1-like isoform X1 [Carex littledalei]	46.2243	693.819	1244.09	4782.92	5660.98	3180.05		Ce000002Fg139		165.886	142.15	196.29	630.341	860.731	1790.11
Ce000001Fg377	Ras-related protein RABA5c [Carex littledalei]	134.521	48.9813	12.709	0	0.126863	0		Ce000001Fg98	allene oxide cyclase, chloroplastic [Elaeis guineensis]	379.256	699.514	381.421	17.9334	6.54401	2.16641		Ce000004Fg215	protein RADIALIS-like 1-like protein [Carex littledalei]	3.58973	2.83321	8.36624	8.96375	7.4885	4.75935		Ce000002Fg153	lysine-specific demethylase REF6 [Carex littledalei]	12.5802	7.12582	10.7538	15.358	17.817	36.1073
Ce000001Fg403	hypothetical protein OsJ_27153 [Oryza sativa Japonica Group]	14.0253	9.90972	7.46858	5.81739	5.25768	3.76693		Ce000001Fg99	hypothetical protein FCM35_KLT15879 [Carex littledalei]	74.3705	128.686	122.7	52.7744	40.2567	11.5015		Ce000004Fg250	Dual-specificity RNA methyltransferase RlmN [Carex littledalei]	3.15299	2.79561	2.78268	6.55658	5.95516	4.74908		Ce000002Fg156	14-3-3 protein 7-like isoform X1 [Carex littledalei]	20.9316	26.7574	15.9431	34.7514	51.2768	62.0096
Ce000001Fg6	NADP-dependent malic enzyme-like protein [Carex littledalei]	177.779	71.5763	34.2892	9.21579	11.753	6.55062		Ce000002Fg105	hypothetical protein GQ55_6G022400 [Panicum hallii var. hallii]	101.941	279.542	328.889	54.4943	40.8813	0.907436		Ce000004Fg260	hypothetical protein FCM35_KLT15818 [Carex littledalei]	92.6875	24.5976	43.0532	136.857	76.8457	46.8716		Ce000002Fg191	cell division cycle protein 123 [Carex littledalei]	3.068	2.80767	2.99128	5.60807	5.43608	6.54131
Ce000001Fg63	ubiquitin domain-containing protein 1-like protein [Carex littledalei]	12.792	11.0604	10.3405	6.66376	6.27942	11.5811		Ce000002Fg129	pyrophosphatase PpaX [Carex littledalei]	18.6419	21.0068	16.4258	8.33139	7.27328	3.55323		Ce000004Fg59	transcriptional corepressor LEUNIG-like protein, partial [Eleocharis dulcis]	18.8677	28.2736	52.5311	48.0726	31.528	38.7586		Ce000002Fg246		16.7539	12.0851	14.4325	33.7217	21.4369	42.5669
Ce000001Fg66	Enoyl-CoA delta isomerase 3 [Carex littledalei]	17.0952	10.0218	9.57112	7.68742	8.75008	6.21403		Ce000002Fg155	protein TRIGALACTOSYLDIACYLGLYCEROL 3 [Carex littledalei]	61.3458	69.1868	59.5548	30.2211	28.3219	20.8309		Ce000005Fg139	heavy metal-associated isoprenylated plant protein 26-like protein [Carex littledalei]	2.31836	3.26639	9.80038	47.3085	74.4138	34.7497		Ce000002Fg27	cleavage and polyadenylation specificity factor subunit 3-II [Carex littledalei]	4.19084	2.49917	3.49937	11.9002	12.0333	12.7716
Ce000001Fg75	BURP domain-containing protein 3 [Carex littledalei]	34.9688	17.2293	4.67314	18.6512	10.9677	0.0502267		Ce000002Fg16	bifunctional aspartate aminotransferase and glutamate/aspartate-prephenate aminotransferase-like isoform X1 [Carex littledalei]	69.8581	60.8945	66.3804	24.4824	15.9911	5.90044		Ce000005Fg151	VQ motif-containing protein [Carex littledalei]	6.18814	0.96706	1.89189	9.02889	12.4414	6.63403		Ce000002Fg292	Transmembrane protein 205 [Carex littledalei]	0.410215	0.640802	3.53738	8.61531	25.2138	46.9318
Ce000002Fg10	protein NRT1/ PTR FAMILY 5.10-like protein [Carex littledalei]	33.7412	12.479	5.69003	3.37352	2.53651	1.93092		Ce000002Fg17	transmembrane protein 18 [Carex littledalei]	19.2674	27.3025	18.916	8.14295	7.52109	16.738		Ce000005Fg170	multifunctional methyltransferase subunit TRM112-like protein [Carex littledalei]	11.7409	8.42719	13.176	23.4631	23.0328	14.6701		Ce000002Fg293	hypothetical protein Lal_00023197 [Lupinus albus]	61.3432	46.29	40.9457	90.7391	102.858	142.556
Ce000002Fg106	hypothetical protein C3L33_13382, partial [Rhododendron williamsianum]	29.5632	20.2766	14.292	4.25304	3.3446	2.03604		Ce000002Fg195	hypothetical protein DY000_02043848, partial [Brassica cretica]	44.4451	40.0772	43.6164	28.2202	29.8935	16.6346		Ce000005Fg190	serine/threonine-protein kinase SAPK2 [Carex littledalei]	13.9394	15.4866	22.5362	28.6158	20.8982	9.36964		Ce000002Fg52	nucleolar protein 16 [Carex littledalei]	11.7543	7.01098	7.03127	20.1336	17.3245	42.3727
Ce000002Fg109	PREDICTED: lysine histidine transporter 1-like [Musa acuminata subsp. malaccensis]	302.526	109.679	42.7169	20.237	8.24187	1.98468		Ce000002Fg204	proteasome subunit beta type-4-like isoform X1 [Carex littledalei]	106.938	113.572	109.843	73.571	54.7803	25.1415		Ce000005Fg192	Helicase associated domain (HA2) [Carex littledalei]	3.70994	1.99816	3.11299	8.73749	9.31933	7.60218		Ce000002Fg58	Serine/arginine-rich-splicing factor SR34 [Carex littledalei]	61.9361	65.4371	80.9306	94.9317	95.5554	171.859
Ce000002Fg125	hypothetical protein C2845_PM07G32030 [Panicum miliaceum]	100.101	50.7966	27.7475	12.2209	7.76768	1.89185		Ce000002Fg207	homeobox protein knotted-1-like 1 [Carex littledalei]	67.8548	125.071	74.6348	49.8705	34.4002	17.5865		Ce000005Fg198	60S ribosomal protein L23a-like isoform X1 [Carex littledalei]	5.72671	10.0336	9.80007	15.3166	12.9164	7.78974		Ce000002Fg59	chaperone protein dnaJ 49 [Carex littledalei]	7.83474	7.47392	9.07561	17.2666	18.2751	22.5736
Ce000002Fg130	hypothetical protein EJB05_10060 [Eragrostis curvula]	78.5777	74.4687	66.2243	41.426	39.6373	30.6083		Ce000002Fg209	ocs element-binding factor 1 [Carex littledalei]	266.224	406.807	275.489	48.2998	23.5632	16.4901		Ce000005Fg224		0.406079	3.18557	8.41401	43.2059	27.2287	10.1362		Ce000002Fg65	LEA5 [Chimonanthus praecox]	150.135	202.147	248.179	780.722	1700.38	4838.42
Ce000002Fg154	actin-related protein 3 isoform X2 [Carex littledalei]	42.5875	33.1901	23.214	17.8362	15.7625	13.6225		Ce000002Fg240	protein DEHYDRATION-INDUCED 19 2-like protein [Carex littledalei]	77.2749	112.53	88.6559	39.572	32.0482	27.6094		Ce000005Fg243	poly [Carex littledalei]	8.20641	1.29699	10.9858	27.122	21.6152	24.227		Ce000002Fg82	hypothetical protein FCM35_KLT16741 [Carex littledalei]	2.8143	1.04406	5.50213	28.3657	50.8986	85.2259
Ce000002Fg164	hypothetical protein FCM35_KLT18917 [Carex littledalei]	16.7819	10.3131	11.5642	4.15004	4.1776	5.90839		Ce000002Fg269	hypothetical protein B296_00006845 [Ensete ventricosum]	12.4367	34.652	29.7452	18.4095	10.3001	3.9453		Ce000005Fg249	hypothetical protein FCM35_KLT14892 [Carex littledalei]	0.267067	45.134	31.904	46.4039	34.8266	17.915		Ce000003Fg115	hypothetical protein FCM35_KLT04692 [Carex littledalei]	49.1215	35.3804	37.8921	70.1849	70.442	100.826
Ce000002Fg168	E3 ubiquitin-protein ligase RGLG1 [Zea mays]	252.507	218.233	190.597	27.0734	26.9966	27.6629		Ce000002Fg28	thiamine pyrophosphokinase 1 isoform X1 [Morus notabilis]	32.4491	35.9929	25.4062	7.16317	6.23362	5.82258		Ce000005Fg258	1,4-alpha-glucan-branching enzyme, partial [Eleocharis dulcis]	33.1742	179.059	166.492	203.095	195.048	87.8861		Ce000003Fg117	hypothetical protein FCM35_KLT04688 [Carex littledalei]	18.3597	18.8787	37.02	37.5589	44.5998	54.1999
Ce000002Fg170	E3 ubiquitin-protein ligase RGLG5-like isoform X1 [Cicer arietinum]	12.9456	6.25293	2.56311	1.60866	0.824844	0.277259		Ce000002Fg281	F-box protein [Carex littledalei]	24.9682	71.7007	72.0796	17.0459	12.5396	10.7178		Ce000005Fg266	hypothetical protein FCM35_KLT14868 [Carex littledalei]	15.1465	9.49479	14.6526	56.4425	45.716	18.925		Ce000003Fg188	hypothetical protein FCM35_KLT03323 [Carex littledalei]	20.9444	17.062	24.8753	40.5057	38.4682	46.4209
Ce000002Fg172	hypothetical protein Csa_013722 [Cucumis sativus]	143.772	58.5244	20.7051	2.44742	1.36548	0.378858		Ce000002Fg282	ethylene-responsive transcription factor RAP2-3 isoform X2 [Carex littledalei]	40.7193	91.1909	45.8779	1.91065	1.66406	0.241531		Ce000005Fg289	protein CURVATURE THYLAKOID 1D [Carex littledalei]	20.1684	26.4874	32.8547	47.7023	51.4925	29.6775		Ce000003Fg206	Erythroid differentiation-related factor 1 [Carex littledalei]	12.0157	7.62878	11.549	16.841	18.6052	31.7405
Ce000002Fg173	PTI1-like tyrosine-protein kinase [Carex littledalei]	22.2143	22.0959	8.64091	1.59428	1.09294	0.336553		Ce000002Fg289	protochlorophyllide-dependent translocon component 52 [Carex littledalei]	117.567	337.249	423.552	44.5556	20.1491	0.808552		Ce000005Fg9	Chlorophyll synthase, chloroplastic [Cinnamomum micranthum f. kanehirae]	30.4253	69.9896	54.4621	68.3039	65.9521	46.6523		Ce000003Fg21	hemK methyltransferase family member 1 [Carex littledalei]	2.87741	1.84063	1.56834	4.76829	4.68516	8.92246
Ce000002Fg213	Protein FAM91A1 [Carex littledalei]	30.6039	32.5801	20.6535	9.63821	6.94135	5.80489		Ce000002Fg290	ethylene-responsive transcription factor ERF071-like protein [Carex littledalei]	603.646	1398.1	1415.62	294.577	140.418	90.1586		Ce000006Fg103	ATP-dependent Clp protease ATP-binding subunit clpA like CD4B, chloroplastic [Apostasia shenzhenica]	3.50289	3.92538	12.7573	90.9253	67.4522	68.4051		Ce000003Fg215	Deoxycytidine kinase [Carex littledalei]	63.4644	56.4854	63.4682	113.854	113.93	139.661
Ce000002Fg218	NdhI, partial [Rhyticaryum macrocarpum]	200.192	122.998	134.975	101.315	78.7212	61.2985		Ce000002Fg303	GTPase-activating protein gyp1 [Ananas comosus]	29.5499	33.5374	29.5911	22.0516	19.458	12.2712		Ce000006Fg120	hypothetical protein FCM35_KLT16238 [Carex littledalei]	2.57192	2.78025	4.40719	11.8036	8.28746	5.95391		Ce000003Fg233	hypothetical protein SEVIR_9G484000v2 [Setaria viridis]	9.81552	9.0207	8.1683	10.1604	12.5047	19.6943
Ce000002Fg219	putative Na+/K+/Cl-cotransport protein [Carex littledalei]	35.0859	25.1444	15.7547	15.9957	15.5295	10.7005		Ce000002Fg314	RNA polymerase II-associated protein 3-like isoform X2 [Carex littledalei]	15.561	19.0156	18.8362	12.0401	9.31274	5.97641		Ce000006Fg14	hypothetical protein HYC85_017774 [Camellia sinensis]	12.2447	11.3632	14.8799	28.8868	26.4944	12.1923		Ce000003Fg259	uncharacterized protein LOC8077159 [Sorghum bicolor]	3.15729	9.11306	14.1274	6.96929	14.2876	23.3183
Ce000002Fg239	lysophospholipid acyltransferase LPEAT1 isoform X1 [Carex littledalei]	16.7763	12.2518	8.28768	9.22536	7.88239	9.30412		Ce000002Fg333	acyl-CoA-binding domain-containing protein 5-like protein [Carex littledalei]	3.56673	16.0797	23.4473	15.1591	11.7246	4.0586		Ce000006Fg214		16.2789	7.0826	5.79845	19.2492	12.157	13.7236		Ce000003Fg27	hypothetical protein FCM35_KLT01358 [Carex littledalei]	17.3563	18.2206	29.5804	41.2937	46.8725	58.2153
Ce000002Fg263	Intron-binding protein aquarius [Ananas comosus]	14.1871	6.69644	5.33941	8.07337	5.99136	11.2623		Ce000002Fg344	hypothetical protein FCM35_KLT09345 [Carex littledalei]	4.74469	61.1875	58.6777	0.38177	0.138787	0		Ce000006Fg37	pentatricopeptide repeat-containing protein [Carex littledalei]	3.16342	7.39755	7.72561	11.3855	7.64342	2.80796		Ce000003Fg28		7.14231	8.41605	12.7765	15.916	18.9928	20.3487
Ce000002Fg267	putative disease resistance RPP13-like protein 1 [Ananas comosus]	11.432	5.49925	3.56105	1.93143	1.46281	0.847632		Ce000002Fg345	putative protein phosphatase 2C 47 [Carex littledalei]	85.3739	289.851	333.444	89.1595	72.6169	13.2301		Ce000006Fg45_Ce000006Fg46	Regulatory protein RecX [Carex littledalei]	2.37492	1.88448	1.822	5.78179	5.39784	4.34743		Ce000003Fg280	G-box-binding factor 4-like protein [Carex littledalei]	16.0278	15.499	18.1483	28.5348	39.1393	41.3064
Ce000002Fg299	hypothetical protein FCM35_KLT05108 [Carex littledalei]	12.3881	6.03458	7.73797	6.40283	6.1771	6.04545		Ce000003Fg10	beta-1,4-mannosyl-glycoprotein 4-beta-N-acetylglucosaminyltransferase [Carex littledalei]	5.94898	13.5786	4.1412	0.284072	0.24556	0.157707		Ce000006Fg67	putative plastid-lipid-associated protein 13 [Carex littledalei]	27.3482	35.965	34.7143	97.1153	118.773	99.8729		Ce000003Fg36	pyridoxal 5'-phosphate synthase subunit PDX1 [Tripterygium wilfordii]	8.66749	11.1809	15.5617	11.8041	14.1085	19.6046
Ce000002Fg311	strigolactone esterase D14 [Ananas comosus]	123.284	80.5525	79.6739	26.5713	12.4462	21.0876		Ce000003Fg113	PREDICTED: cytochrome c isoform X2 [Populus euphratica]	96.5565	99.4635	88.6564	21.2187	22.4213	22.3986		Ce000007Fg110	zinc-finger of the FCS-type, C2-C2 [Carex littledalei]	128.292	224.579	327.103	285.345	381.557	140.882		Ce000003Fg37	histone deacetylase HDT2-like protein [Carex littledalei]	87.269	47.2426	56.584	114.879	103.741	190.724
Ce000002Fg330	ATP-citrate synthase beta chain protein 1-like protein [Carex littledalei]	214.962	112.633	97.4848	134.56	126.602	56.41		Ce000003Fg123_Ce000003Fg124	Zinc finger CCCH domain-containing protein 19 [Carex littledalei]	20.4581	18.1215	20.4462	20.7873	18.4337	8.92717		Ce000007Fg114	chaperonin [Carex littledalei]	20.168	33.6973	54.1024	56.7921	59.2344	32.8841		Ce000003Fg51	unnamed protein product [Ananas comosus var. bracteatus]	2.26351	1.48001	2.47108	4.9791	6.17663	6.56802
Ce000002Fg334	ATP-citrate synthase [Carex littledalei]	92.8088	50.2096	40.608	56.3588	52.5223	19.8246		Ce000003Fg129	NAC domain-containing protein 48-like protein [Carex littledalei]	202.63	413.593	432.259	145.851	115.061	43.6482		Ce000007Fg118	hypothetical protein FCM35_KLT12195 [Carex littledalei]	32.8517	40.8992	44.319	103.898	86.2859	67.5059		Ce000003Fg62	metallothionein-like protein type 2 [Phalaenopsis equestris]	8.58463	4.64787	96.2447	2334.09	3336.85	6151.86
Ce000002Fg347	Transmembrane emp24 domain-containing protein p24beta2 [Carex littledalei]	25.5343	23.4522	20.0486	17.7621	20.535	10.5164		Ce000003Fg135	ubinuclein-1-like protein [Carex littledalei]	28.5352	25.7643	33.7118	33.1707	24.1741	12.6174		Ce000007Fg120	sucrose synthase 2 [Carex littledalei]	153.822	981.407	1058.39	1229.67	938.371	404.561		Ce000003Fg66	inner membrane protein PPF-1 [Carex littledalei]	15.1935	13.0779	12.1071	39.351	32.3399	66.6339
Ce000002Fg348	hypothetical protein FCM35_KLT07783 [Carex littledalei]	19.2249	16.0463	10.882	5.82366	4.90458	2.30967		Ce000003Fg150	scarecrow-like protein 1 [Carex littledalei]	122.278	181.345	226.899	76.2991	50.6728	33.0256		Ce000007Fg16	putative peptidoglycan binding domain-containing protein [Carex littledalei]	4.85011	6.71605	7.32725	12.3389	10.2527	11.0244		Ce000003Fg7	septin and tuftelin-interacting protein 1 1 [Carex littledalei]	5.21354	4.49026	7.13688	6.35801	8.17141	13.2668
Ce000002Fg354	putative protein S-acyltransferase 7 [Carex littledalei]	50.5649	36.1797	23.2786	12.3615	10.8693	9.42391		Ce000003Fg153	bidirectional sugar transporter SWEET1a [Carex littledalei]	38.5824	122.959	113.484	57.5901	117.375	10.6934		Ce000007Fg162_Ce000007Fg163	tetratricopeptide repeat protein 4 isoform X1 [Carex littledalei]	9.95934	12.5263	22.9684	14.7361	14.8952	15.5816		Ce000004Fg127	hypothetical protein FCM35_KLT06538 [Carex littledalei]	8.40091	6.39446	6.82422	9.8651	10.9456	17.4745
Ce000002Fg360	BAR domain-containing protein [Carex littledalei]	20.9477	20.0801	19.4705	18.8889	17.1899	9.87441		Ce000003Fg160	putative pectinesterase/pectinesterase inhibitor 51 [Carex littledalei]	12.9085	28.7842	11.854	4.32238	1.22473	0.194007		Ce000007Fg164	universal stress protein A-like protein [Carex littledalei]	28.2483	223.69	534.663	631.962	561.451	533.887		Ce000004Fg134	pentatricopeptide repeat-containing protein [Carex littledalei]	2.85089	1.14869	2.2661	15.9292	19.7164	47.9454
Ce000002Fg50	Heparan-alpha-glucosaminide N-acetyltransferase [Dichanthelium oligosanthes]	28.3788	15.2157	10.1779	11.6736	9.64994	10.3102		Ce000003Fg20	DnaJ subfamily C member 14 [Carex littledalei]	19.7898	21.1137	21.4966	22.9013	19.9506	6.73509		Ce000007Fg199	putative BOI-related E3 ubiquitin-protein ligase 3 isoform X2 [Carex littledalei]	10.7001	11.972	9.19598	16.4466	27.6122	11.8861		Ce000004Fg158	zinc finger protein zpr1-like protein [Carex littledalei]	11.5629	9.65753	21.6077	15.2717	17.2196	37.6277
Ce000002Fg51	hypothetical protein B296_00051419 [Ensete ventricosum]	12.1948	6.2237	4.20532	5.55349	6.0378	8.47693		Ce000003Fg210	hypothetical protein FCM35_KLT03342 [Carex littledalei]	7.24692	8.55853	17.899	8.59524	1.85857	0.349584		Ce000007Fg211	dihydrolipoyl dehydrogenase 1, chloroplastic-like [Panicum miliaceum]	44.9306	36.1458	40.0969	95.8394	82.3913	16.0511		Ce000004Fg216	PREDICTED: uncharacterized protein LOC105036880 [Elaeis guineensis]	0.12804	0	1.15105	4.80712	14.0474	50.244
Ce000002Fg56	phytochrome A-associated F-box protein-like protein [Carex littledalei]	13.5407	8.65471	5.75709	4.30059	4.20343	2.27026		Ce000003Fg223	Protein QUIRKY [Carex littledalei]	48.4579	74.9989	72.6183	25.8621	15.9664	6.51763		Ce000007Fg244	E3 ubiquitin protein ligase DRIP1 [Carex littledalei]	3.81707	0.475781	2.40037	7.2225	7.73465	2.26745		Ce000004Fg224	iron-sulfur cluster assembly protein 1-like protein [Carex littledalei]	25.9058	13.6672	26.8647	42.7337	57.2069	67.4767
Ce000002Fg71	BTB/POZ and MATH domain-containing protein 4 [Carex littledalei]	43.0698	9.36237	2.51928	0	0.0305243	0		Ce000003Fg229	hypothetical protein FCM35_KLT03358 [Carex littledalei]	19.086	33.9581	32.6937	10.2813	6.42895	5.99403		Ce000007Fg40	peroxygenase-like protein [Carex littledalei]	12.7405	6.759	74.4214	43.672	82.0425	30.4104		Ce000004Fg269	single-stranded DNA-binding protein [Carex littledalei]	11.1348	8.79996	8.49433	20.2702	20.3743	22.7891
Ce000002Fg81	transcription factor bHLH128-like protein [Carex littledalei]	31.4323	15.1791	10.2005	5.14027	2.71978	1.73532		Ce000003Fg231	potassium channel AKT2-like isoform X1 [Carex littledalei]	12.8115	56.3054	14.639	0.393321	0.0707363	0.084796		Ce000008Fg118	Agmatine deiminase [Carex littledalei]	21.8925	32.9586	44.7747	56.7999	55.7616	56.6159		Ce000004Fg60	tyrosine--tRNA ligase [Carex littledalei]	35.4126	26.1277	33.3763	56.5474	46.0499	87.7554
Ce000003Fg11	multicopy suppressor of IRA1 [Carex littledalei]	20.1675	17.3589	12.4681	12.2676	10.6023	7.27362		Ce000003Fg267	putative serine/threonine-protein kinase [Carex littledalei]	1.72777	15.8717	5.46489	0.140561	0.0671507	0		Ce000008Fg130	oleoyl-acyl carrier protein thioesterase 1 [Carex littledalei]	72.6716	81.0272	378.455	875.976	894.175	777.032		Ce000004Fg8	hypothetical protein FCM35_KLT21551 [Carex littledalei]	5.98721	8.46546	7.20995	7.09803	4.00448	13.5636
Ce000003Fg112	hypothetical protein FCM35_KLT04694 [Carex littledalei]	56.5315	27.4769	31.18	28.9506	30.3491	28.6873		Ce000003Fg268	protein S-acyltransferase 8-like protein [Carex littledalei]	13.9417	16.3883	10.8367	6.55805	4.9594	2.45386		Ce000008Fg132	PIN-like protein [Carex littledalei]	6.33143	0.997188	3.79664	17.6984	16.9118	12.1791		Ce000004Fg9	PREDICTED: pentatricopeptide repeat-containing protein At3g54980, mitochondrial-like [Theobroma cacao]	1.78901	0.638286	1.48255	5.3834	4.85848	8.26582
Ce000003Fg116	Auxilin-related protein 2 [Carex littledalei]	91.4963	80.5302	64.7163	34.5987	34.1032	47.3895		Ce000003Fg270	ethylene-responsive transcription factor ERF113-like protein [Carex littledalei]	5.45998	26.5426	12.7705	1.70662	0.115553	2.98832		Ce000008Fg133	auxin efflux carrier component 8 [Carex littledalei]	0.255247	0.0167213	3.38623	39.8249	26.8201	14.9722		Ce000005Fg103	mannan synthase 7 [Carex littledalei]	9.94757	18.4705	17.5575	14.9001	17.2734	25.3742
Ce000003Fg128	hypothetical protein GQ55_6G010500 [Panicum hallii var. hallii]	19.8343	15.5222	15.4503	10.8163	9.39852	4.20528		Ce000003Fg276	Integral membrane Yip1 family protein [Zea mays]	23.2866	34.8828	33.8752	10.0582	9.19382	3.55893		Ce000008Fg141	LOW QUALITY PROTEIN: uridine kinase-like protein 1, chloroplastic [Vigna radiata var. radiata]	38.8955	29.5035	60.6834	58.1081	45.3726	18.548		Ce000005Fg107	putative calcium-binding protein CML45 [Carex littledalei]	4.17989	0.641303	0.665461	3.55264	8.2465	10.2714
Ce000003Fg141	WD repeat-containing protein 11 isoform X1 [Carex littledalei]	26.8164	28.7301	20.5139	11.0611	8.73776	5.94738		Ce000003Fg277	cellulose synthase A catalytic subunit 5 [Carex littledalei]	12.0539	69.0431	36.4185	3.88599	1.95382	0.762015		Ce000008Fg177	arogenate dehydrogenase 2 [Carex littledalei]	21.0333	23.7267	39.387	50.2085	46.5791	24.5043		Ce000005Fg116	hypothetical protein FCM35_KLT12959 [Carex littledalei]	2.03842	4.20528	3.50414	2.52355	3.09936	22.933
Ce000003Fg142	probable magnesium transporter NIPA4 isoform X4 [Phoenix dactylifera]	34.4264	31.5374	21.9603	17.2475	17.4587	10.6863		Ce000003Fg29	villin-1 isoform X1 [Carex littledalei]	20.246	26.7725	21.0249	12.4416	8.07231	3.97689		Ce000008Fg197	S-adenosylmethionine synthase 1-like protein [Carex littledalei]	324.975	121.681	183.657	439.652	352.45	287.36		Ce000005Fg135	hypothetical protein C5167_008378 [Papaver somniferum]	11.344	10.024	13.3528	25.5435	27.7628	32.1975
Ce000003Fg155	NAC domain-containing protein 74-like isoform X1 [Carex littledalei]	238.617	163.969	126.962	108.14	113.602	49.844		Ce000003Fg297	zinc finger protein CONSTANS-LIKE 4 isoform X1 [Carex littledalei]	63.2965	115.171	49.0916	22.688	14.652	33.8481		Ce000008Fg204	hypothetical protein C4D60_Mb11t18530 [Musa balbisiana]	5.92352	6.48905	14.3892	19.8901	9.35011	1.66496		Ce000005Fg148	WD repeat-containing protein C2A9.03 [Carex littledalei]	6.61648	4.16522	15.6964	9.69446	16.2287	61.6453
Ce000003Fg156		51.4731	39.0299	28.66	24.3364	20.9753	6.76159		Ce000003Fg30	villin-1 isoform X1 [Carex littledalei]	12.0864	13.7457	9.56067	9.03828	5.99145	2.36183		Ce000008Fg5	putative aminotransferase TAT2 isoform X2 [Carex littledalei]	2.03643	2.86773	3.14153	8.47014	7.1999	2.15235		Ce000005Fg158	transcription elongation factor SPT4 2-like protein [Carex littledalei]	33.1001	30.7464	27.823	59.0593	67.2705	89.0199
Ce000003Fg162	UDP-glucuronate:xylan alpha-glucuronosyltransferase 1-like protein [Carex littledalei]	282.955	274.578	152.032	146.035	142.051	35.6621		Ce000003Fg42	hypothetical protein C4D60_Mb10t16230 [Musa balbisiana]	22.9276	26.927	21.2921	15.482	13.7495	6.46872		Ce000008Fg6	rootletin-like protein [Carex littledalei]	8.07631	8.89706	14.9088	91.8867	88.7051	74.3441		Ce000005Fg189	Ribosomal protein S6e [Theobroma cacao]	187.548	116.611	122.49	258.447	198.519	392.559
Ce000003Fg165	dirigent protein 22-like protein [Carex littledalei]	134.977	47.3378	11.3017	2.39373	1.25758	0		Ce000003Fg56	LIMR family protein [Panicum miliaceum]	47.5487	55.0664	45.8609	22.3725	15.4739	11.8982		Ce000008Fg73	hypothetical protein FCM35_KLT22167 [Carex littledalei]	102.069	141.337	157.962	179.427	216.954	146.089		Ce000005Fg232	heme-binding-like protein [Carex littledalei]	0.82192	0.392481	0.689753	3.03346	5.87222	34.3728
Ce000003Fg168	dirigent protein 22-like protein [Carex littledalei]	835.209	174.153	78.1415	0.904486	0.965041	0.0757537		Ce000003Fg60	Triosephosphate isomerase isoform 1 [Theobroma cacao]	202.172	422.156	514.729	378.686	324.155	202.467		Ce000008Fg90	Horcolin [Carex littledalei]	4.2623	3.3932	8.58377	9.88722	9.58616	8.30804		Ce000005Fg260	Mitochondrial ATPase inhibitor, IATP [Carex littledalei]	2.84065	4.26865	22.58	10.1271	25.0946	206.058
Ce000003Fg171	transcriptional activator SPT7 isoform X3 [Carex littledalei]	34.695	27.5673	26.3829	24.4167	20.8811	14.3335		Ce000003Fg61	hypothetical protein FCM35_KLT01331 [Carex littledalei]	24.9414	24.5226	30.8902	16.6958	11.7131	25.2356		Ce000009Fg130	glucan endo-1,3-beta-glucosidase 8 [Carex littledalei]	6.11934	7.42123	6.66613	10.6399	17.008	10.6502		Ce000005Fg270	glycine-rich RNA-binding protein 4 [Carex littledalei]	0.978136	0.514641	0.376093	5.90954	6.30134	6.8347
Ce000003Fg176	60S ribosomal protein L3-like protein [Carex littledalei]	42.9382	16.888	16.9312	12.6612	9.65821	10.1194		Ce000004Fg103	bidirectional sugar transporter SWEET6a-like protein [Carex littledalei]	12.4764	36.3323	18.6231	4.46943	1.88786	0.45459		Ce000009Fg3	Cationic peroxidase SPC4 [Ananas comosus]	36.3456	84.9644	67.9397	96.6094	95.1602	72.5979		Ce000005Fg312	Dipeptidyl aminopeptidase BIII [Carex littledalei]	19.823	14.5661	17.223	27.2833	29.9849	51.042
Ce000003Fg179	type 1 phosphatases regulator YPI1-like protein [Carex littledalei]	77.0571	55.2597	47.7014	29.9844	31.8093	18.7491		Ce000004Fg124	hypothetical protein FCM35_KLT21484 [Carex littledalei]	11.3361	22.9127	9.73662	0.426038	0.52206	0.068043		Ce000010Fg110	Glucose-6-phosphate/phosphate translocator 2 [Carex littledalei]	9.28125	18.5396	49.5453	314.472	401.775	107.951		Ce000005Fg313	3-dehydrosphinganine reductase TSC10B [Carex littledalei]	0.281983	0.251256	0.136281	3.40355	20.2993	70.675
Ce000003Fg180	protein YLS7 [Carex littledalei]	17.3306	12.3929	8.66825	6.29582	6.80021	6.70238		Ce000004Fg144	Histidine triad, conserved site-containing protein [Artemisia annua]	18.3777	56.8612	20.1495	1.44117	0.394106	0.863086		Ce000010Fg111	glucose-6-phosphate/phosphate translocator 2 [Carex littledalei]	99.9432	1000.89	877.032	2015.98	1855.74	299.174		Ce000005Fg34	hypothetical protein FCM35_KLT17105 [Carex littledalei]	8.72553	10.1795	10.4079	10.8083	11.561	17.4727
Ce000003Fg187	putative beta-1,3-galactosyltransferase 8 [Carex littledalei]	20.0619	12.5174	12.0744	14.1555	14.3018	9.69859		Ce000004Fg184	CTD small [Carex littledalei]	22.708	24.4407	22.716	10.5558	10.3867	9.24358		Ce000010Fg140	PREDICTED: ribonuclease 3-like protein 1 [Eucalyptus grandis]	3.21643	10.4064	5.21791	11.251	9.24109	9.40222		Ce000005Fg40	putative phosphoribosylformylglycinamidine synthase [Carex littledalei]	13.3956	4.10906	6.02857	21.9251	25.9223	89.3829
Ce000003Fg189	RNA-binding protein 24-like protein [Carex littledalei]	86.568	28.6148	35.3587	9.52424	4.17347	0.854356		Ce000004Fg188	serine carboxypeptidase-like 50 [Carex littledalei]	1.04924	7.84246	6.49809	3.83819	4.46157	1.18439		Ce000010Fg158	cyclic nucleotide-gated ion channel 4 [Carex littledalei]	3.38906	4.13828	10.3044	9.77354	10.236	7.43114		Ce000005Fg81	ribonucleoprotein A [Carex littledalei]	62.8404	61.3266	82.7847	383.34	379.185	1270.46
Ce000003Fg211	hypothetical protein FCM35_KLT03343 [Carex littledalei]	323.976	262	240.428	148.238	179.978	133.49		Ce000004Fg222	polygalacturonase [Carex littledalei]	7.04074	16.9653	7.10025	4.69434	0.369088	0.0187223		Ce000010Fg185	putative disease resistance protein RGA3 [Elaeis guineensis]	1.91762	1.51371	2.02969	15.1064	12.4605	10.9457		Ce000005Fg82	CS domain-containing protein [Carex littledalei]	11.6478	5.94117	11.868	14.9898	22.0441	57.6332
Ce000003Fg213	hypothetical protein FCM35_KLT03344 [Carex littledalei]	66.03	33.8381	23.1632	14.6674	11.5365	6.53972		Ce000004Fg231	cinnamoyl-CoA reductase 2-like isoform X1 [Carex littledalei]	17.1781	17.5849	32.7578	20.4962	8.39213	6.08479		Ce000010Fg30	ATP synthase gamma chain, chloroplastic [Phalaenopsis equestris]	3.08055	3.72727	5.24831	14.7764	14.5006	6.63673		Ce000005Fg91	hypothetical protein GW17_00021733 [Ensete ventricosum]	44.5103	22.2925	20.2246	30.6229	28.0329	38.8616
Ce000003Fg225	patellin-3-like protein [Carex littledalei]	174.714	166.428	108.695	52.4922	42.7253	67.6464		Ce000004Fg234	hypothetical protein FCM35_KLT21817 [Carex littledalei]	24.0745	52.0224	73.8169	12.9732	12.3271	5.39492		Ce000010Fg37		0.163191	1.86214	8.17903	9.73713	2.89433	0.299573		Ce000005Fg92	hypothetical protein FCM35_KLT12937 [Carex littledalei]	7.94911	6.15894	5.26938	8.92797	9.42907	17.6411
Ce000003Fg236	hypothetical protein FCM35_KLT03362 [Carex littledalei]	73.45	54.8102	47.1615	31.6496	32.8666	26.6062		Ce000004Fg252	Serine/threonine-protein kinase HT1 [Carex littledalei]	10.2798	20.657	19.6427	7.08455	7.56287	4.13872		Ce000010Fg53		11.7086	7.55284	7.20277	25.0931	16.5918	11.0348		Ce000006Fg138	Nodal modulator 1 [Carex littledalei]	14.4679	10.9337	7.60088	6.29934	8.71726	15.7419
Ce000003Fg238	amidophosphoribosyltransferase [Carex littledalei]	26.1152	11.3434	13.1232	17.5382	11.3106	6.82442		Ce000004Fg26	EG45-like domain containing protein [Carex littledalei]	7.52083	45.6422	41.3339	7.68702	2.459	0.747699		Ce000010Fg7	methionine aminopeptidase 1B [Carex littledalei]	2.80943	4.30039	6.24492	10.8758	10.6462	5.19832		Ce000006Fg139	Nodal modulator 1 [Carex littledalei]	27.0482	16.1852	12.737	14.8113	18.5017	31.4349
Ce000003Fg247	zinc finger protein STOP1 [Carex littledalei]	33.0033	39.2438	20.8279	21.3675	18.0695	11.2729		Ce000004Fg50	inactive receptor kinase [Carex littledalei]	17.2203	41.3101	24.6094	3.6152	1.28127	0.163046		Ce000011Fg123	Sm-like protein LSM7 [Ananas comosus]	25.7753	42.197	46.77	64.825	57.7602	51.3122		Ce000006Fg175	Transmembrane protein 205 [Carex littledalei]	0.655175	0.858578	3.40572	11.3767	33.2314	60.9741
Ce000003Fg272	hypothetical protein C3L33_18246, partial [Rhododendron williamsianum]	54.938	43.9801	39.9156	17.5185	11.6134	7.60488		Ce000004Fg69	dnaJ subfamily C member 11-like protein [Carex littledalei]	2.8856	78.7157	183.182	22.7975	55.1109	21.7314		Ce000011Fg124	protein cornichon 1-like protein [Carex littledalei]	6.68314	13.4344	10.8181	17.5703	14.4887	2.8265		Ce000006Fg215		25.9871	18.9548	21.4462	63.409	51.2952	84.6306
Ce000003Fg273	polypyrimidine tract-binding protein 3-like protein [Carex littledalei]	31.6492	27.5613	29.4969	21.3796	19.1224	12.7007		Ce000004Fg74	cyclin-B1-2-like protein [Carex littledalei]	57.8892	60.8988	57.8938	55.2471	36.61	22.9245		Ce000011Fg170	E3 ubiquitin-protein ligase RING1-like protein [Carex littledalei]	12.592	26.8505	79.1403	37.7889	52.1264	37.6279		Ce000006Fg244	Ribosome biogenesis protein BRX [Ananas comosus]	13.5308	4.63229	6.5269	15.7051	12.3169	13.7238
Ce000003Fg274	valine--tRNA ligase [Carex littledalei]	34.7159	28.2314	24.5914	20.9617	14.5933	20.0598		Ce000005Fg119	sphinganine C(4)-monooxygenase 1-like protein [Carex littledalei]	11.9861	19.1814	26.1507	7.37616	5.67763	1.74223		Ce000011Fg249	serine/threonine-protein kinase SAPK2 [Carex littledalei]	12.5361	15.9524	21.6581	28.8007	23.1717	8.87015		Ce000006Fg38	hypothetical protein CK203_040688 [Vitis vinifera]	1.46847	1.95145	5.369	48.0371	36.6623	44.3746
Ce000003Fg283	tubby-like F-box protein 8 [Carex littledalei]	44.2287	29.6142	24.4065	20.6134	15.6151	10.4004		Ce000005Fg120	sphinganine C(4)-monooxygenase 1-like protein [Carex littledalei]	24.5997	37.342	52.0939	17.6188	12.9181	4.67524		Ce000011Fg251	Helicase associated domain (HA2) [Carex littledalei]	4.05077	2.40827	3.5226	11.0123	9.87394	8.6512		Ce000006Fg50	hypothetical protein Ahy_B01g051582 [Arachis hypogaea]	586.158	516.891	535.524	1649.67	2050.55	2652.98
Ce000003Fg287	hypothetical protein TanjilG_08513 [Lupinus angustifolius]	221.319	165.365	64.2013	11.2091	9.11194	6.12138		Ce000005Fg124	4-alpha-glucanotransferase DPE1 [Carex littledalei]	35.4456	179.905	199.573	162.94	166.32	57.2596		Ce000011Fg259	60S ribosomal protein L23a-like isoform X1 [Carex littledalei]	7.85548	12.1554	14.4453	16.8979	13.719	8.29774		Ce000007Fg139	vacuolar protein sorting-associated protein 27 isoform X2 [Carex littledalei]	23.6381	31.0393	27.9986	46.3483	36.9154	75.0065
Ce000003Fg292	VAMP-like protein YKT61 [Carex littledalei]	29.0303	19.6986	16.9968	11.2	9.64825	5.41665		Ce000005Fg143	leucine--tRNA ligase [Carex littledalei]	43.0171	39.4283	47.9603	30.4651	21.1475	20.508		Ce000011Fg78	hypothetical protein G4B88_001623 [Cannabis sativa]	24.0562	53.7802	46.8463	52.1375	51.552	34.3348		Ce000007Fg141	hypothetical protein FCM35_KLT12219 [Carex littledalei]	4.55417	3.09868	3.58294	7.23431	6.10111	9.25784
Ce000003Fg312	putative 4-coumarate--CoA ligase 3 [Carex littledalei]	137.875	86.4399	73.8742	45.0592	27.3361	4.68698		Ce000005Fg149	putative trehalose-phosphate phosphatase 6 [Carex littledalei]	158.956	124.333	199.515	171.55	170.7	38.0224		Ce000012Fg11	histone H2AX [Carex littledalei]	59.0176	28.5402	30.8678	67.9913	77.0251	44.897		Ce000007Fg166	protein-lysine N-methyltransferase N6AMT2 [Carex littledalei]	2.95268	1.64308	2.50542	5.71233	7.03779	6.18727
Ce000003Fg43	DNA-directed RNA polymerase II subunit 1-like protein [Carex littledalei]	16.4194	9.64578	6.37771	9.80721	6.42606	9.755		Ce000005Fg200	hypothetical protein C2845_PM03G13080 [Panicum miliaceum]	43.9827	45.6321	45.2471	32.1092	26.1657	21.8321		Ce000012Fg155	ankyrin repeat protein SKIP35-like protein [Carex littledalei]	12.8004	7.87389	8.2221	34.7035	80.2492	34.3988		Ce000007Fg176	cytosolic Fe-S cluster assembly factor narfl-like isoform X2 [Carex littledalei]	6.8387	6.58008	8.55434	20.7677	22.4823	37.5954
Ce000004Fg168	ER membrane protein complex subunit 6-like protein [Carex littledalei]	16.4961	12.6924	11.1746	8.83792	7.58496	5.45496		Ce000005Fg275	hypothetical protein BHE74_00016223 [Ensete ventricosum]	62.6476	145.027	99.7399	41.3424	42.2267	19.8865		Ce000012Fg173	hypothetical protein FCM35_KLT20870 [Carex littledalei]	26.1614	39.793	56.7864	72.3723	57.251	50.9699		Ce000007Fg186	YTH domain-containing family protein 2-like protein [Carex littledalei]	226.391	134.24	160.728	940.39	1073.04	2391.51
Ce000004Fg175	ATP synthase subunit beta [Carex littledalei]	151.219	109.254	104.1	67.8721	63.8966	54.5478		Ce000005Fg285_Ce000005Fg286	hypothetical protein FCM35_KLT14849 [Carex littledalei]	10.4934	21.8441	18.3878	2.86324	3.86519	1.42167		Ce000012Fg209	F-box/WD-40 repeat-containing protein [Carex littledalei]	2.98306	1.85288	2.02529	6.07264	5.77952	5.1024		Ce000007Fg39	caleosin [Carex littledalei]	0.351329	0.125726	0.455258	2.53803	10.8192	31.797
Ce000004Fg18	serine/arginine-rich SC35-like splicing factor SCL30 isoform X3 [Carex littledalei]	34.4187	19.4021	18.3555	20.3674	20.7389	14.1456		Ce000005Fg300	hypothetical protein FCM35_KLT14838 [Carex littledalei]	31.3284	45.744	80.1926	54.8388	37.4431	45.5291		Ce000012Fg219	BTB/POZ domain-containing protein [Carex littledalei]	1.88549	4.16781	5.33404	6.55091	6.90896	4.05475		Ce000007Fg47	TPR repeat [Carex littledalei]	7.9097	9.62208	10.4855	20.8091	28.259	42.2398
Ce000004Fg187	hypothetical protein DVH24_039770 [Malus domestica]	139.217	108.482	92.6735	81.1776	64.8011	87.7078		Ce000005Fg44	Indole-3-glycerol [Carex littledalei]	12.8947	13.6648	11.6197	10.3071	8.53299	5.17761		Ce000012Fg232	Seipin [Carex littledalei]	2.74787	1.6844	14.8417	49.4993	55.256	46.4069		Ce000007Fg56	Beta-amylase 1 [Carex littledalei]	46.5456	55.7176	42.6774	89.2828	274.816	509.894
Ce000004Fg189	Mitogen-activated protein kinase 10 [Nymphaea thermarum]	93.6553	68.7181	70.0549	51.5468	26.9068	17.0775		Ce000005Fg45	methyl-CpG-binding domain-containing protein 2-like protein [Carex littledalei]	17.4306	19.2483	19.0019	17.9593	12.7648	7.15661		Ce000012Fg245	SWI/SNF-related matrix-associated actin-dependent regulator [Carex littledalei]	0.958967	0.143245	0.492436	7.74848	6.71807	4.30409		Ce000007Fg64	transmembrane protein 120 isoform X1 [Carex littledalei]	3.28301	2.01215	3.23016	3.79561	5.74586	11.8684
Ce000004Fg194	hypothetical protein C2845_PM05G28010 [Panicum miliaceum]	88.8398	63.994	55.4898	44.1572	36.3273	23.7286		Ce000005Fg47	extradiol ring-cleavage dioxygenase-like protein [Carex littledalei]	142.297	318.062	230.206	16.4103	6.12352	1.73645		Ce000012Fg5	hypothetical protein FCM35_KLT04107 [Carex littledalei]	41.5419	33.1458	62.4104	86.6896	65.9752	30.429		Ce000007Fg66	AWPM-19-like family [Carex littledalei]	0.296699	1.46529	15.8016	5.03094	8.19304	14.3885
Ce000004Fg2	Nucleosome-remodeling factor subunit BPTF [Carex littledalei]	14.1803	6.95404	6.68208	4.77298	3.56067	4.35911		Ce000006Fg102	ADP-ribosylation factor GTPase-activating protein AGD3 isoform X1 [Carex littledalei]	19.2789	21.8145	14.9666	9.03152	6.64844	1.79254		Ce000012Fg54	hypothetical protein FCM35_KLT04146 [Carex littledalei]	4.65129	13.6838	14.0886	22.6701	25.4866	3.227		Ce000007Fg92	nuclear cap-binding protein subunit 1-like protein [Carex littledalei]	2.43999	1.70395	1.78988	4.30895	6.13207	6.60994
Ce000004Fg203	aspartic proteinase oryzasin-1-like protein [Carex littledalei]	283.515	73.5284	65.4154	42.0516	38.11	104.421		Ce000006Fg125	putative protein phosphatase 2C 47 [Carex littledalei]	64.743	210.985	233.195	53.1407	42.5863	9.47187		Ce000012Fg55	homeobox protein Hox-B3-like protein [Carex littledalei]	0.742004	0.983225	1.4208	7.90963	13.0689	8.11691		Ce000008Fg107	GTP cyclohydrolase I 1 [Carex littledalei]	26.0467	29.9439	77.4098	125.48	103.276	142.172
Ce000004Fg208	hypothetical protein FCM35_KLT09426 [Carex littledalei]	33.4483	24.7308	16.2913	11.2287	8.36589	3.55629		Ce000006Fg126	hypothetical protein FCM35_KLT09345 [Carex littledalei]	5.0573	57.687	41.2958	0.309214	0.031561	0.102009		Ce000012Fg99	RNA polymerase sigma factor rpoD [Carex littledalei]	7.10501	9.7756	11.4587	16.9015	13.6116	14.2489		Ce000008Fg111	FHA domain-containing protein FHA2 [Carex littledalei]	39.905	15.9369	17.1079	55.2788	67.4618	124.933
Ce000004Fg221	hypothetical protein DY000_02057371 [Brassica cretica]	136.663	103.904	127.201	46.2427	58.1711	100.806		Ce000006Fg137	acyl-CoA-binding domain-containing protein 4-like isoform X2, partial [Populus alba]	4.90287	14.4754	15.805	7.59198	7.27425	3.20836		Ce000013Fg133	transmembrane protein 205-like protein [Carex littledalei]	34.8391	44.4908	54.283	69.5426	68.9878	36.0611		Ce000008Fg119	hypothetical protein FCM35_KLT07833 [Carex littledalei]	28.5655	16.8337	17.1082	46.2409	47.7584	85.2693
Ce000004Fg240	carbonic anhydrase 2 [Carex littledalei]	38.9737	6.11582	8.54631	10.0904	7.99983	2.14222		Ce000006Fg164	TBC1 domain family member 22A [Zea mays]	33.6378	33.6746	31.0457	24.4018	19.5811	12.9932		Ce000013Fg177	cleavage and polyadenylation specificity factor subunit 3-II [Carex littledalei]	3.32138	1.64842	2.62719	10.7376	9.53319	9.53439		Ce000008Fg122	hypothetical protein FCM35_KLT07831 [Carex littledalei]	2.08384	0.663724	2.73622	3.77885	8.36549	16.114
Ce000004Fg261	long chain base biosynthesis protein 1b isoform X1 [Carex littledalei]	16.811	15.446	11.48	11.1633	10.6441	7.24954		Ce000006Fg177	ethylene-responsive transcription factor ERF071-like protein [Carex littledalei]	524.364	1214.93	1255.98	269.786	127.519	60.5511		Ce000013Fg92	succinate dehydrogenase assembly factor 4 [Carex littledalei]	8.83609	5.56901	6.62015	19.1575	31.979	18.9928		Ce000008Fg125	tRNA-splicing endonuclease subunit sen54 N-term [Carex littledalei]	3.80943	1.1307	2.04331	6.99364	8.05768	11.3516
Ce000004Fg273	guanine nucleotide-binding protein subunit beta-like protein A [Carex littledalei]	161.264	109.032	115.704	107.823	68.3291	56.3963		Ce000006Fg178	protochlorophyllide-dependent translocon component 52 [Carex littledalei]	49.8747	140.564	215.28	22.1292	9.253	0.47603		Ce000014Fg16	hypothetical protein FCM35_KLT19864 [Carex littledalei]	3.69451	3.44961	4.4051	8.14529	11.876	8.90043		Ce000008Fg142	delta-1-pyrroline-5-carboxylate synthase-like protein [Carex littledalei]	23.9232	16.785	18.6214	35.004	33.7011	50.2649
Ce000004Fg28	hypothetical protein OsJ_27153 [Oryza sativa Japonica Group]	13.5624	11.69	10.0542	6.5194	5.5297	5.35492		Ce000006Fg186	F-box protein [Carex littledalei]	27.7382	82.4749	92.2981	20.4905	14.9218	11.0825		Ce000014Fg160	ATP synthase subunit b' [Carex littledalei]	2.78899	2.82539	4.17594	8.66836	14.2366	7.75515		Ce000008Fg154	sulfite oxidase [Carex littledalei]	37.0447	50.2303	56.7849	88.7484	101.064	114.65
Ce000004Fg34	N-alpha-acetyltransferase 50 [Vitis vinifera]	31.147	18.9977	15.0231	16.5163	14.6098	11.3397		Ce000006Fg221	protein DEHYDRATION-INDUCED 19 2-like protein [Carex littledalei]	78.2335	112.119	93.9031	41.5509	29.5288	24.6516		Ce000014Fg191	ornithine carbamoyltransferase [Carex littledalei]	36.4001	50.828	64.5311	95.4338	84.4287	62.044		Ce000008Fg166	Telomere recombination [Carex littledalei]	2.7247	2.95617	5.99266	13.5501	14.5225	15.9254
Ce000004Fg37	V-type proton ATPase subunit c''2 [Ananas comosus]	50.8394	44.7771	42.6401	28.1681	28.4814	23.5455		Ce000006Fg233	hypothetical protein FCM35_KLT09401 [Carex littledalei]	14.6991	21.7144	20.1711	6.7448	1.8835	4.02917		Ce000014Fg66	hypothetical protein JCGZ_14114 [Jatropha curcas]	4.14646	5.03168	4.98384	9.60719	7.4669	7.71133		Ce000008Fg208	hypothetical protein GQ55_5G027400 [Panicum hallii var. hallii]	12.2652	10.9251	12.7391	24.8742	25.8697	38.292
Ce000004Fg44	pleiotropic drug resistance protein 3-like isoform X2 [Carex littledalei]	49.786	16.0332	8.26084	4.49232	2.3691	0.600099		Ce000006Fg250	ocs element-binding factor 1 [Carex littledalei]	152.729	239.914	135.468	24.915	6.10378	6.44344		Ce000014Fg68	protein CHUP1, chloroplastic [Phoenix dactylifera]	5.93984	18.7563	24.449	21.698	24.7034	4.17355		Ce000008Fg40	putative tyrosine--tRNA ligase [Carex littledalei]	7.15574	13.8224	16.345	8.35277	8.87378	17.0907
Ce000004Fg56	Ras-related protein RABA5c [Carex littledalei]	100.775	32.6031	6.35106	0	0.0670803	0.0202573		Ce000006Fg252	homeobox protein knotted-1-like 1 [Carex littledalei]	40.6752	52.326	31.7229	26.3581	24.9533	14.4647		Ce000015Fg15	putative pyridoxal biosynthesis protein PDX1.1 [Carex littledalei]	8.96959	72.0318	98.385	78.3173	73.5688	24.9443		Ce000008Fg56	Translationally-controlled tumor protein-like protein [Dichanthelium oligosanthes]	493.618	403.543	455.452	1078	1062.13	2076.28
Ce000004Fg94	chalcone--flavonone isomerase [Carex littledalei]	78.147	17.8768	19.6054	10.148	3.85102	1.18643		Ce000006Fg255	proteasome subunit beta type-4-like isoform X1 [Carex littledalei]	86.2785	92.3115	88.0361	65.8888	49.9256	27.6179		Ce000015Fg21	hypothetical protein FCM35_KLT08644 [Carex littledalei]	16.0009	18.2447	31.3672	94.4439	90.3719	26.7169		Ce000008Fg8	hypothetical protein FCM35_KLT08680 [Carex littledalei]	0.156321	0.148944	1.03843	4.91203	12.3014	28.2222
Ce000005Fg104	DCN1-like protein 1 [Carex littledalei]	32.7615	23.2022	25.1664	19.8488	14.7549	11.5628		Ce000006Fg265	Histidine protein methyltransferase 1 [Carex littledalei]	20.8114	26.9185	23.2912	13.6545	12.1573	9.03772		Ce000015Fg69	Diacylglycerol O-acyltransferase 2 [Carex littledalei]	42.8171	115.293	195.779	197.467	176.423	20.8096		Ce000009Fg134	N utilization substance protein B [Carex littledalei]	10.199	20.0436	18.2115	38.7074	33.6536	40.5928
Ce000005Fg136	Vacuolar sorting 38 and autophagy-related subunit 14 [Carex littledalei]	14.9129	7.50231	9.26297	10.0859	11.9765	7.10898		Ce000006Fg82	hypothetical protein FCM35_KLT07750 [Carex littledalei]	126.808	220.657	265.777	126.724	149.977	187.001		Ce000015Fg95	formin-like protein 8-like protein [Carex littledalei]	2.23254	6.85442	6.58165	7.24926	7.97858	5.86274		Ce000009Fg15	Glutathione S-transferase DHAR3 [Carex littledalei]	5.50458	2.41833	2.86696	4.93643	7.98114	11.0251
Ce000005Fg140	zinc finger CCCH domain-containing protein 15 homolog [Sorghum bicolor]	20.9405	16.5569	14.1022	15.2968	19.3793	9.81673		Ce000006Fg96	putative methyltransferase PMT7 [Carex littledalei]	22.093	26.8528	16.1033	12.5587	8.98697	5.03372		Ce000016Fg104	1,4-alpha-glucan-branching enzyme [Carex littledalei]	25.8922	230.054	477.28	1237.55	1076.19	903.562		Ce000010Fg134	thiamine thiazole synthase 1 [Carex littledalei]	23.2212	11.7316	39.7297	1559.76	1994.32	1790.05
Ce000005Fg155	hypothetical protein FCM35_KLT12988 [Carex littledalei]	93.3333	54.583	48.3902	44.9564	46.4825	32.6733		Ce000007Fg102_Ce000007Fg103	probable nucleoredoxin 1-1 [Panicum hallii]	153.814	469.319	521.777	276.606	300.818	98.1897		Ce000016Fg13	--	38.7295	70.0659	121.929	120.665	58.2873	50.2346		Ce000010Fg150		48.004	34.8103	54.5976	83.9403	112.186	104.739
Ce000005Fg162	copper-transporting ATPase PAA1 [Carex littledalei]	27.1391	15.9549	10.4082	6.8446	6.00804	6.29593		Ce000007Fg140	Calcineurin-like phosphoesterase [Carex littledalei]	5.22843	11.5724	11.0542	3.82585	3.37002	1.187		Ce000016Fg140	RING-H2 finger protein ATL8-like protein [Carex littledalei]	34.7337	64.408	128.628	84.8363	112.056	50.7818		Ce000010Fg151		9.57818	11.5533	1.90418	6.12926	8.95006	25.636
Ce000005Fg172	Microsomal signal peptidase subunit (SPC12) [Carex littledalei]	44.6374	27.7549	37.4301	27.7859	21.6093	13.0094		Ce000007Fg145	caltractin [Populus trichocarpa]	36.5263	41.8308	35.6289	27.8507	22.362	13.1007		Ce000016Fg143	protein kinase APK1B [Carex littledalei]	17.4132	24.5372	27.3015	37.8221	34.2274	35.0529		Ce000010Fg155	hypothetical protein FCM35_KLT16374 [Carex littledalei]	30.1135	14.9519	14.2443	42.3975	61.9614	148.8
Ce000005Fg185	phospho-2-dehydro-3-deoxyheptonate aldolase 1 [Carex littledalei]	701	394.325	227.858	44.6444	38.3331	13.5271		Ce000007Fg146	caltractin [Carex littledalei]	3.0983	40.7633	46.8288	31.2365	19.5739	7.82344		Ce000016Fg163	ACT domain-containing protein ACR9 [Carex littledalei]	72.5716	76.728	98.9594	303.685	289.769	261.192		Ce000010Fg61	polyadenylate-binding protein RBP45 [Carex littledalei]	482.789	603.273	662.208	1439.7	1416.68	1942.47
Ce000005Fg186	ras-related protein Rab11D-like isoform X1 [Carex littledalei]	34.331	26.5839	21.1713	16.5801	12.7486	7.14029		Ce000007Fg149	protein WEAK CHLOROPLAST MOVEMENT UNDER BLUE LIGHT 1-like isoform X2 [Carex littledalei]	19.5525	26.4302	22.9964	15.7441	13.2724	7.4312		Ce000016Fg165	serine carboxypeptidase-like isoform X1 [Carex littledalei]	16.1411	14.8983	17.5761	84.2079	118.542	66.5216		Ce000010Fg62	DEAD-box ATP-dependent RNA helicase 32 [Carex littledalei]	13.2082	7.65284	12.761	24.4414	19.7068	31.7575
Ce000005Fg197	ADP-ribosylation factor-related protein 1 [Ananas comosus]	23.7982	18.4052	16.1097	13.1932	11.6206	8.80429		Ce000007Fg183	PHD finger protein ING2 [Carex littledalei]	8.43298	25.1877	54.475	11.6033	15.2572	5.22907		Ce000016Fg171	organelle RRM domain-containing protein 2, mitochondrial [Punica granatum]	6.1825	2.53519	5.81808	17.245	19.4839	15.9029		Ce000011Fg110	putative phosphoribosylformylglycinamidine synthase [Carex littledalei]	12.2063	4.5576	6.30233	17.9604	19.3836	61.851
Ce000005Fg21	snakin-2-like protein [Carex littledalei]	39.1948	27.9548	22.0754	9.77019	13.0259	14.6337		Ce000007Fg184	A20 and AN1 domain-containing stress-associated protein [Carex littledalei]	83.8855	63.6646	85.5729	33.7728	33.7829	18.7643		Ce000016Fg172	arginine biosynthesis bifunctional protein ArgJ, chloroplastic-like isoform X1 [Papaver somniferum]	41.942	43.7017	64.8137	95.2441	79.9579	57.3133		Ce000011Fg131	hypothetical protein FCM35_KLT17129 [Carex littledalei]	3.71076	2.53201	10.4124	8.84073	4.31215	9.66404
Ce000005Fg211	macrophage erythroblast attacher-like protein [Carex littledalei]	32.3998	27.2317	24.6762	21.3109	18.0861	12.4168		Ce000007Fg227	putative beta-1,4-xylosyltransferase IRX10L [Carex littledalei]	34.2362	74.974	53.7889	12.9744	14.0037	4.75754		Ce000016Fg189	LOW QUALITY PROTEIN: A_thal_3526 domain-containing protein, partial [Cephalotus follicularis]	30.2338	122.244	156.716	189.3	165.006	59.1904		Ce000011Fg144	Ribosomal L32p protein family [Carex littledalei]	7.58384	3.41203	4.98104	8.05219	11.3097	15.8258
Ce000005Fg216	Arogenate dehydratase/prephenate dehydratase 6 [Carex littledalei]	120.932	84.5632	39.7333	28.1542	23.6283	9.71033		Ce000007Fg229_Ce000007Fg230	glycyl-tRNA synthetase-like protein [Carex littledalei]	31.6075	30.2323	35.1903	19.3044	16.5061	6.47616		Ce000016Fg190	protein SLOW GREEN 1, chloroplastic-like [Ananas comosus]	2.5838	2.83767	4.73464	8.87951	10.493	6.37474		Ce000011Fg146	ribonucleoprotein A [Carex littledalei]	39.0124	42.2752	61.4708	248.649	250.182	669.22
Ce000005Fg22	serine/arginine-rich splicing factor RSZ21A isoform X2 [Carex littledalei]	35.8907	28.6199	28.8689	30.6582	25.2447	16.4732		Ce000007Fg68	putative photosystem II protein reaction center W [Carex littledalei]	2.46502	16.1749	16.7257	6.86664	4.95511	0.305822		Ce000016Fg31		5.07512	5.63731	4.56166	12.4704	14.7019	9.60531		Ce000011Fg147	CS domain-containing protein [Carex littledalei]	14.5245	4.87461	9.44785	13.1337	25.3253	84.9723
Ce000005Fg250	60S acidic ribosomal protein P2B isoform X1 [Populus trichocarpa]	370.87	258.031	260.09	232.216	157.14	125.811		Ce000007Fg70	CLIP-associated protein-like protein [Carex littledalei]	19.502	23.6003	20.5485	8.67757	5.39371	3.98359		Ce000016Fg41	Basic region leucine zipper [Carex littledalei]	9.58134	23.7461	26.0047	28.1889	23.8751	8.86588		Ce000011Fg156	hypothetical protein GW17_00021733 [Ensete ventricosum]	19.8952	9.41265	9.14628	13.4724	10.9257	18.3957
Ce000005Fg265	hypothetical protein TEA_018280 [Camellia sinensis var. sinensis]	133.246	81.9885	86.3582	95.1015	65.2553	74.2694		Ce000007Fg95	inter alpha-trypsin inhibitor, heavy chain 4-like protein [Carex littledalei]	55.5924	61.9989	50.3112	10.6005	7.89286	7.38736		Ce000016Fg70	DDB1- and CUL4-associated factor 8 isoform X1 [Carex littledalei]	27.897	61.3765	124.333	318.1	276.776	102.136		Ce000011Fg157	hypothetical protein FCM35_KLT12937 [Carex littledalei]	4.25603	3.54297	4.20085	6.76141	6.75749	14.5057
Ce000005Fg277	blue copper protein-like protein [Carex littledalei]	114.717	108.531	40.8177	2.43971	1.02245	0.45445		Ce000008Fg102	putative glucan endo-1,3-beta-glucosidase A6 [Carex littledalei]	27.6981	39.7279	19.4482	17.1324	11.9372	2.75993		Ce000017Fg102	hypothetical protein FCM35_KLT01770 [Carex littledalei]	3.61364	4.52667	5.05554	7.77927	8.58404	4.04596		Ce000011Fg168	putative mannan synthase 7 [Zea mays]	13.2943	20.7033	22.2844	22.358	21.3086	33.1934
Ce000005Fg284	transport inhibitor response 1-like protein [Carex littledalei]	17.9503	9.37596	4.22244	6.1065	4.97065	3.28666		Ce000008Fg106	Pyruvate decarboxylase [Arachis hypogaea]	561.808	1674.54	3019.38	1135.76	695.38	287.738		Ce000017Fg106	1,4-alpha-glucan-branching enzyme [Carex littledalei]	21.1103	167.804	378.98	1029.76	865.922	670.112		Ce000011Fg171	putative calcium-binding protein CML45 [Carex littledalei]	2.94537	0.466895	0.486891	3.24586	7.01034	10.1367
Ce000005Fg297	mitochondrial uncoupling protein 5-like protein [Carex littledalei]	269.373	178.23	89.4242	46.0262	31.0548	31.853		Ce000008Fg134	Proteasome subunit beta type-1 [Nymphaea thermarum]	163.551	155.785	156.946	105.463	104.015	46.9309		Ce000017Fg142	RING-H2 finger protein ATL8-like protein [Carex littledalei]	18.9691	36.3562	66.7596	53.5768	70.2962	41.142		Ce000011Fg178	hypothetical protein FCM35_KLT12959 [Carex littledalei]	3.88995	5.05633	6.44398	3.32382	5.28284	11.7417
Ce000005Fg306	kinesin-like protein KCA2 [Carex littledalei]	12.8268	7.48219	5.41171	7.9783	5.63141	10.4053		Ce000008Fg190	hypothetical protein DY000_02000598 [Brassica cretica]	26.4627	34.7764	20.5806	9.84679	6.51157	2.36398		Ce000017Fg145	protein kinase APK1B [Carex littledalei]	17.9788	26.8861	24.8739	36.0686	29.741	22.3958		Ce000011Fg196	chaperone protein dnaJ 20 [Carex littledalei]	4.28351	4.64876	6.07804	11.1304	10.7017	22.5385
Ce000005Fg7	dynamin-2A-like protein [Carex littledalei]	31.8294	27.8138	15.6679	6.53957	5.71821	5.33224		Ce000008Fg20	bifunctional 3-dehydroquinate dehydratase/shikimate dehydrogenase [Carex littledalei]	20.8637	27.5793	21.9083	9.5842	8.141	2.95742		Ce000017Fg147	E3 ubiquitin-protein ligase XB3-like protein [Carex littledalei]	115.708	132.359	127.087	456.847	529.899	412.258		Ce000011Fg199	heavy metal-associated isoprenylated plant protein 26-like protein [Carex littledalei]	1.12336	0.417543	1.07095	5.57275	7.21841	6.75052
Ce000005Fg75	serine/threonine-protein kinase TNNI3K-like protein [Carex littledalei]	15.2651	10.5157	8.78707	5.1593	4.85975	2.92424		Ce000008Fg216	nuclear transcription factor Y subunit B-1-like protein [Carex littledalei]	1.07492	13.5943	8.45017	4.22497	2.01112	0.793815		Ce000017Fg167	ACT domain-containing protein ACR9 [Carex littledalei]	57.1372	79.075	94.2916	236.129	237.17	211.031		Ce000011Fg210	WD repeat-containing protein C2A9.03 [Carex littledalei]	4.86808	4.02091	16.9167	8.63163	11.0948	32.7729
Ce000005Fg76	transmembrane emp24 domain-containing protein p24delta9-like protein [Carex littledalei]	39.1713	26.8354	24.5344	26.418	27.4987	17.515		Ce000008Fg34	Acyl-CoA-binding domain-containing protein 4 [Carex littledalei]	15.0143	35.9491	34.2232	13.0901	10.5615	0.684744		Ce000017Fg168	putative disease resistance protein RGA4 isoform X1 [Ananas comosus]	4.79262	4.35179	2.74776	9.70209	5.8888	2.4624		Ce000011Fg218	hypothetical protein BHE74_00012788 [Ensete ventricosum]	18.893	15.5975	17.4478	42.9571	48.3095	79.7722
Ce000005Fg78	cystathionine gamma-synthase [Carex littledalei]	207.319	179.182	175.247	59.6687	38.1222	17.2655		Ce000008Fg47	Rapid alkalinization factor [Carex littledalei]	73.5946	100.48	59.3705	6.27379	6.07288	2.34974		Ce000017Fg169	serine carboxypeptidase-like isoform X1 [Carex littledalei]	10.8958	7.87341	14.2003	84.9797	143.384	93.0604		Ce000011Fg25	NAP1-related protein 2-like isoform X5 [Carex littledalei]	136.327	89.2759	101.97	362.002	298.047	615.427
Ce000005Fg84	protein PIR [Carex littledalei]	35.9787	36.3624	23.1217	17.5102	13.7868	7.24274		Ce000008Fg58	fiber protein Fb19 [Carex littledalei]	156.19	273.672	600.402	228.827	154.941	107.944		Ce000017Fg175	unnamed protein product [Triticum turgidum subsp. durum]	13.217	7.17758	20.0798	39.9616	46.9703	22.7531		Ce000011Fg40		2.92079	2.57688	5.8789	7.22584	5.43107	15.0089
Ce000005Fg88	homeobox-leucine zipper protein HOX21-like isoform X2 [Carex littledalei]	53.8367	16.0687	8.67622	3.57223	2.66162	1.35686		Ce000008Fg65	hypoxia induced protein conserved region containing protein [Carex littledalei]	146.419	241.905	336.433	62.8239	59.5133	21.9957		Ce000017Fg176	arginine biosynthesis bifunctional protein ArgJ [Striga asiatica]	19.1342	18.6738	27.0114	39.0036	32.8651	19.8437		Ce000011Fg80	Phospholipase DDHD2 [Carex littledalei]	11.3718	10.677	11.4832	16.9723	16.1372	27.5931
Ce000005Fg89	transcription factor ILI3 [Carex littledalei]	20.6447	9.82901	3.44319	0.376878	0.547912	0		Ce000008Fg7	hypothetical protein FCM35_KLT08681 [Carex littledalei]	16.8434	16.9411	22.9551	11.6549	10.1338	7.69598		Ce000017Fg185	glycine-rich RNA-binding protein 4 [Carex littledalei]	3.13541	2.53185	4.3842	9.73844	7.97086	6.11153		Ce000012Fg111	pentatricopeptide repeat-containing protein [Carex littledalei]	0.484605	0.0672373	0.483257	3.32481	4.30353	7.70149
Ce000006Fg106		95.6018	63.2273	44.7107	14.5017	9.93965	0.290353		Ce000009Fg132	mitochondrial chaperone BCS1-B [Carex littledalei]	14.3675	67.2815	56.3446	35.1536	39.8513	21.5551		Ce000017Fg196	LOW QUALITY PROTEIN: A_thal_3526 domain-containing protein, partial [Cephalotus follicularis]	6.65199	24.1956	26.3245	34.6483	31.2836	9.53313		Ce000012Fg120	eukaryotic translation initiation factor 3 subunit E-like protein [Carex littledalei]	161.69	121.15	125.614	248.833	207.546	353.172
Ce000006Fg107	zinc finger protein CONSTANS-LIKE 14-like protein [Carex littledalei]	65.8376	25.6724	30.0512	11.6299	10.8775	24.5578		Ce000009Fg136	GATA transcription factor 2-like protein [Carex littledalei]	15.6228	43.3975	23.847	3.86464	0.867003	0.378662		Ce000017Fg197	hypothetical protein B296_00010938 [Ensete ventricosum]	3.06607	3.33227	5.26998	10.8933	11.9413	8.60011		Ce000012Fg141	golgin subfamily A member 6-like protein 1 [Elaeis guineensis]	30.7169	18.4914	15.374	34.1332	41.5088	64.05
Ce000006Fg11	Early nodulin-like protein 1 [Carex littledalei]	46.5297	34.5153	18.9206	36.9812	15.9617	4.0434		Ce000009Fg137	putative WRKY transcription factor 2-like protein [Carex littledalei]	9.01697	29.5339	11.2147	4.81203	0.904238	1.1501		Ce000017Fg42	Basic region leucine zipper [Carex littledalei]	22.3897	39.6346	42.9878	62.6031	53.6587	20.5656		Ce000012Fg144	hypothetical protein FCM35_KLT04225 [Carex littledalei]	15.3061	5.01734	35.9446	48.0985	148.726	383.321
Ce000006Fg116	putative protein S-acyltransferase 7 [Carex littledalei]	43.1591	34.7247	22.3489	11.7836	10.4589	9.01638		Ce000009Fg49	protein WVD2-like 1 [Carex littledalei]	42.4131	49.3249	39.2457	23.4355	17.1402	15.2014		Ce000017Fg43		10.5211	13.3034	14.9745	27.5871	21.4866	13.2653		Ce000012Fg145	ATP-dependent RNA helicase DBP2 [Carex littledalei]	21.6594	15.4827	20.8316	33.8109	25.3353	53.265
Ce000006Fg122	hypothetical protein FCM35_KLT07783 [Carex littledalei]	19.4793	16.2488	11.2592	7.14836	6.00203	3.27606		Ce000010Fg136	putative xyloglucan endotransglucosylase/hydrolase protein 8 [Carex littledalei]	9.95432	20.5353	10.0357	0.09355	0	0		Ce000017Fg49	hypothetical protein FCM35_KLT01810 [Carex littledalei]	8.47469	14.1907	12.2955	15.3725	17.2171	16.175		Ce000012Fg146	peroxiredoxin-2E-2 [Carex littledalei]	12.4251	7.3265	10.2528	75.8343	80.2868	105.264
Ce000006Fg123	Transmembrane emp24 domain-containing protein p24beta2 [Carex littledalei]	23.8852	21.3268	17.1251	15.8217	14.6085	9.20658		Ce000010Fg149		16.552	35.0749	23.6513	1.31707	0.254646	0.0717203		Ce000017Fg68	DDB1- and CUL4-associated factor 8 isoform X1 [Carex littledalei]	34.4362	81.996	148.806	420.257	336.674	114.168		Ce000012Fg150	Cytochrome B5 isoform D [Carex littledalei]	4.44248	0.39063	1.71156	4.86648	9.34187	13.3184
Ce000006Fg136	ATP-citrate synthase [Carex littledalei]	93.5029	53.793	48.9046	80.1932	61.4994	36.4025		Ce000010Fg159	putative protein TPRXL [Carex littledalei]	42.3794	43.7051	60.74	12.7758	8.90749	4.28619		Ce000018Fg23	50S ribosomal protein L28 [Carex littledalei]	8.56544	10.2691	9.47196	25.1512	23.9152	21.5385		Ce000012Fg151	rRNA methyltransferase YqxC [Carex littledalei]	4.37539	2.63322	5.13853	12.2845	15.613	31.2323
Ce000006Fg140	ATP-citrate synthase beta chain protein 1-like protein [Carex littledalei]	248.529	119.676	97.0417	132.599	128.566	60.0206		Ce000010Fg175	LOW QUALITY PROTEIN: mitogen-activated protein kinase kinase kinase 18 [Elaeis guineensis]	29.7545	96.3223	114.427	14.4495	6.47675	2.21978		Ce000018Fg85	uncharacterized protein LOC103706976 [Phoenix dactylifera]	7.89578	8.3095	10.9879	29.378	22.257	17.0961		Ce000012Fg18	hypothetical protein F8388_013007 [Cannabis sativa]	5.44687	3.83535	5.66153	14.3895	19.9658	35.1949
Ce000006Fg156	strigolactone esterase D14 [Ananas comosus]	150.618	95.8353	89.6536	33.5659	15.378	22.4439		Ce000010Fg176	hypothetical protein E2562_011633 [Oryza meyeriana var. granulata]	48.2452	168.26	184.194	18.4337	6.54753	2.84113		Ce000018Fg87	hypothetical protein CICLE_v10015055mg [Citrus clementina]	3.28883	3.97237	4.373	7.76041	6.12323	4.63761		Ce000012Fg198	hypothetical protein FCM35_KLT20889 [Carex littledalei]	13.5735	8.81528	10.8738	15.5712	19.9967	38.9673
Ce000006Fg168	hypothetical protein FCM35_KLT05108 [Carex littledalei]	18.6994	7.58351	9.91667	9.51267	10.9115	9.27376		Ce000010Fg177	hypothetical protein E2562_011633 [Oryza meyeriana var. granulata]	44.736	65.5539	76.9892	17.6364	7.1218	3.6186		Ce000020Fg108	RING-H2 finger protein ATL79-like protein [Carex littledalei]	1.23177	3.22104	2.34837	8.76151	6.03047	0.394751		Ce000012Fg211	F-box/LRR-repeat protein 4 [Carex littledalei]	23.697	10.7054	31.5287	94.3482	92.7625	298.293
Ce000006Fg18	hypothetical protein Lal_00003199 [Lupinus albus]	185.976	42.3499	23.2443	6.88188	4.4158	1.60581		Ce000010Fg179	LOW QUALITY PROTEIN: mitogen-activated protein kinase kinase kinase 18 [Elaeis guineensis]	10.1472	23.2178	32.7189	4.97451	2.65093	0.545988		Ce000020Fg147	remorin [Amborella trichopoda]	343.384	193.98	312.343	824.779	660.478	168.082		Ce000012Fg212	F-box/LRR-repeat protein 4 [Carex littledalei]	24.3804	8.89557	33.0542	91.1968	96.8859	388.327
Ce000006Fg222	lysophospholipid acyltransferase LPEAT1 isoform X1 [Carex littledalei]	18.0749	11.5565	9.64007	10.1752	9.0586	10.0779		Ce000010Fg183	hypothetical protein LSAT_1X5861 [Lactuca sativa]	114.644	115.757	115.179	76.7268	81.9783	43.4014		Ce000020Fg17	CDGSH iron-sulfur domain-containing protein NEET [Carex littledalei]	5.68305	14.7659	22.3763	27.7809	34.8247	22.9859		Ce000012Fg213		0.419735	0.838994	3.03198	11.7699	17.1497	21.983
Ce000006Fg225	unnamed protein product [Triticum turgidum subsp. durum]	16.7518	7.55913	5.67899	4.69909	4.47422	5.3621		Ce000010Fg2	7-deoxyloganetin glucosyltransferase-like protein [Carex littledalei]	3.02892	9.47227	4.43384	0.327356	0.0555147	0.0453373		Ce000020Fg51	putative methyltransferase PMT15 [Carex littledalei]	2.25578	2.71905	3.80107	7.04137	7.64297	7.11148		Ce000012Fg240	basic leucine zipper and W2 domain-containing protein 2-like protein [Carex littledalei]	214.33	144.716	212.128	553.118	673.705	887.136
Ce000006Fg228	hypothetical protein FCM35_KLT09410 [Carex littledalei]	16.7152	14.8517	13.5967	11.0539	12.4324	8.05083		Ce000010Fg49	protein TRANSPARENT TESTA 12-like protein [Carex littledalei]	10.3752	24.4253	12.1172	8.56532	5.98353	0.555841		Ce000021Fg120	hypothetical protein FCM35_KLT13817 [Carex littledalei]	5.50249	9.90971	19.4489	37.1811	36.6496	23.839		Ce000012Fg242	putative embryo-specific protein Ose731 [Oryza sativa Japonica Group]	1.87996	1.32151	3.70146	79.4576	732.156	1351.75
Ce000006Fg242	putative Na+/K+/Cl-cotransport protein [Carex littledalei]	15.8585	10.8378	7.45924	8.20321	7.63992	5.17815		Ce000010Fg6	glucan endo-1,3-beta-glucosidase 1-like isoform X2 [Carex littledalei]	6.67049	21.7871	12.1938	3.45131	2.00055	0.388322		Ce000021Fg147	UDP-arabinose 4-epimerase 1 [Carex littledalei]	60.3155	82.4525	64.4383	102.988	78.5317	24.6518		Ce000012Fg248	hypothetical protein FCM35_KLT20931 [Carex littledalei]	3.19671	14.49	55.494	247.436	245.767	374.066
Ce000006Fg243	NADH-plastoquinone oxidoreductase subunit I [Aegilops peregrina]	83.929	46.7654	54.3534	44.6255	32.385	35.3834		Ce000010Fg85	phospholipase A I isoform X2 [Carex littledalei]	27.4836	30.4137	22.6492	7.55615	7.85065	7.98514		Ce000021Fg15	PLATZ transcription factor [Carex littledalei]	2.09711	1.58833	3.35961	6.0819	6.4601	5.5024		Ce000012Fg249	phosphoglucan, water dikinase [Carex littledalei]	16.317	20.3285	17.6468	38.4631	35.3566	77.9685
Ce000006Fg25	external alternative NAD(P)H-ubiquinone oxidoreductase B2 [Carex littledalei]	196.548	170.183	38.8859	7.31693	20.3018	52.2947		Ce000010Fg86	succinate dehydrogenase subunit 3-1 [Carex littledalei]	21.7367	22.9063	26.7191	20.3275	15.0752	5.52904		Ce000021Fg34	hypothetical protein FCM35_KLT13740 [Carex littledalei]	2.55042	3.48372	3.77956	7.10808	6.4427	6.63663		Ce000012Fg28	Zinc finger protein VAR3 [Carex littledalei]	3.20377	1.87379	3.27739	6.96862	7.46069	7.66352
Ce000006Fg263	hypothetical protein BHE74_00054277 [Ensete ventricosum]	31.9369	27.9949	29.4232	21.6505	21.346	13.1728		Ce000011Fg115	indole-3-glycerol phosphate synthase, chloroplastic-like [Setaria viridis]	13.0434	13.825	13.6192	12.4149	9.66708	6.12815		Ce000021Fg94	DAG protein [Carex littledalei]	7.43493	5.77471	9.91868	21.1343	17.4225	15.4524		Ce000012Fg36	hypothetical protein FCM35_KLT04134 [Carex littledalei]	2.35231	0.729239	0.854703	4.19667	6.70158	8.81816
Ce000006Fg34	WD repeat-containing protein 26 [Carex littledalei]	69.1518	54.1631	44.1562	31.6698	31.2854	20.4331		Ce000011Fg116	methyl-CpG-binding domain-containing protein 2-like protein [Carex littledalei]	18.4784	29.1043	32.9456	26.0809	16.5243	6.75124		Ce000022Fg116	protein EXORDIUM [Elaeis guineensis]	5.83552	5.35921	9.88089	13.5873	14.0507	14.323		Ce000012Fg88	DEAD-box ATP-dependent RNA helicase 3 [Carex littledalei]	6.27574	3.31671	6.7435	25.3341	17.8289	27.6468
Ce000006Fg35		27.4314	20.7954	15.1767	13.9877	12.3002	10.8275		Ce000011Fg118	extradiol ring-cleavage dioxygenase-like protein [Carex littledalei]	151.987	346.741	272.316	29.34	10.0262	1.54443		Ce000022Fg117	protein EXORDIUM-like 1 [Elaeis guineensis]	4.52803	6.49345	7.73178	13.4985	12.8536	10.1512		Ce000012Fg91	SPX domain-containing protein 4 isoform X2 [Carex littledalei]	5.26728	4.10201	6.096	10.6573	10.0994	10.7011
Ce000006Fg39	egg cell-secreted protein 1.4-like protein [Carex littledalei]	314.021	223.085	224.388	197.946	129.97	74.0071		Ce000011Fg143	cystathionine gamma-synthase [Carex littledalei]	89.638	91.5715	71.8863	27.6187	17.2906	7.61278		Ce000022Fg118	hypothetical protein FCM35_KLT06709 [Carex littledalei]	5.92755	5.92261	7.43482	24.2183	27.4827	8.28866		Ce000012Fg93	hypothetical protein FCM35_KLT04182 [Carex littledalei]	152.135	162.765	331.46	145.008	205.799	782.156
Ce000006Fg44	Vacuolar protein sorting-associated protein 32 [Carex littledalei]	209.614	178.918	160.133	78.3797	73.8977	41.2515		Ce000011Fg181	sphinganine C(4)-monooxygenase 1-like protein [Carex littledalei]	21.3952	32.4547	45.8242	14.874	11.021	3.64717		Ce000022Fg119	peroxygenase-like protein [Carex littledalei]	7.41325	43.7566	510.938	1726.83	1190.23	1477.48		Ce000013Fg127	hypothetical protein FCM35_KLT18860 [Carex littledalei]	9.47633	7.80847	9.95062	13.7076	16.8061	31.1114
Ce000006Fg56	SWIB/MDM2 domain containing protein [Carex littledalei]	17.9677	8.60413	8.43311	9.28673	8.75572	8.35656		Ce000011Fg185	4-alpha-glucanotransferase DPE1 [Carex littledalei]	18.862	99.817	108.709	87.5522	96.7462	31.5127		Ce000022Fg177	malate dehydrogenase [Hibiscus syriacus]	952.291	1118.61	1098.38	2123.61	1791.96	932.097		Ce000013Fg139	DDB1- and CUL4-associated factor 13 isoform X1 [Carex littledalei]	8.59945	7.77609	10.9473	21.6003	14.5288	20.259
Ce000006Fg74	N-acylphosphatidylethanolamine synthase-like isoform X1 [Carex littledalei]	16.4875	14.3352	12.6101	7.64874	9.01512	6.57258		Ce000011Fg190	G-type lectin S-receptor-like serine/threonine-protein kinase LECRK3 [Phoenix dactylifera]	5.37895	14.8713	4.48418	0.58145	0.166534	0.234558		Ce000022Fg187	hypothetical protein GW17_00000267, partial [Ensete ventricosum]	20.4202	5.21982	11.7904	41.0999	47.5948	7.86174		Ce000013Fg17	protein EXECUTER 1 [Carex littledalei]	12.9611	14.9378	15.0755	16.0052	14.9412	34.9679
Ce000006Fg75	Myb/SANT-like DNA-binding domain-containing protein [Carex littledalei]	616.97	507.94	523.839	320.409	304.405	79.0307		Ce000011Fg203	leucine--tRNA ligase [Carex littledalei]	24.6906	22.7055	26.6227	16.6376	12.0821	9.33774		Ce000022Fg194	Senescence regulator [Carex littledalei]	14.4963	9.66109	12.8623	19.2541	29.5455	16.108		Ce000013Fg21	peroxisomal membrane protein PEX14-like protein [Carex littledalei]	41.5086	25.7151	27.3313	51.1974	67.3157	100.046
Ce000006Fg77	putative cyclophilin-type peptidyl-prolyl cis-trans isomerase [Cinnamomum micranthum f. kanehirae]	234.107	231.093	192.599	144.729	146.003	91.7892		Ce000011Fg232	Microsomal signal peptidase subunit (SPC12) [Carex littledalei]	26.1589	21.6631	30.3114	20.4451	13.8185	7.24952		Ce000022Fg47	phosphatidylinositol 4-kinase gamma 7-like protein [Carex littledalei]	97.4792	130.816	164.645	170.269	216.812	151.156		Ce000013Fg46	protein RER1B-like protein [Carex littledalei]	12.2477	11.0119	8.97776	13.3523	14.1761	42.7125
Ce000006Fg79	elongation factor Tu [Carex littledalei]	91.9327	43.4458	49.2675	70.3965	53.6428	55.9544		Ce000011Fg24	hypothetical protein Saspl_010993 [Salvia splendens]	14.2243	33.4639	65.3997	11.4896	13.672	12.8138		Ce000023Fg130	hypothetical protein FCM35_KLT08297 [Carex littledalei]	18.003	29.4911	48.3914	85.9267	82.1658	79.8122		Ce000014Fg11	membrane-anchored ubiquitin-fold protein 4-like protein [Carex littledalei]	27.0525	25.5239	34.2646	51.7738	44.3215	72.0002
Ce000006Fg87	retinoblastoma-related protein isoform X1 [Carex littledalei]	27.7827	14.7164	13.2107	11.8887	10.3323	7.10214		Ce000011Fg261	hypothetical protein C2845_PM03G13080 [Panicum miliaceum]	34.9582	33.786	32.2299	23.7824	21.1812	9.94478		Ce000023Fg133	bifunctional nuclease 2-like isoform X1 [Carex littledalei]	6.43142	8.01814	11.792	21.4593	15.7691	16.4846		Ce000014Fg129	Similar to human CGI-33 protein [Arabidopsis thaliana]	24.8198	12.2294	18.1882	27.2411	30.3274	31.3796
Ce000006Fg88	Stress up-regulated Nod 19 [Carex littledalei]	89.4299	4.75369	7.87439	8.71201	7.37581	3.84701		Ce000011Fg36	Vacuolar amino acid transporter 1 [Carex littledalei]	9.83639	26.0503	14.1208	7.3372	4.51166	5.45293		Ce000023Fg145	lysosomal beta glucosidase-like protein [Carex littledalei]	4.6759	3.74529	10.1447	11.146	6.7069	5.05421		Ce000014Fg148	spindle pole body component 110 isoform X2 [Carex littledalei]	13.0408	5.73308	5.51105	10.4032	11.6532	10.1412
Ce000006Fg97	LOW QUALITY PROTEIN: chitin elicitor receptor kinase 1-like [Elaeis guineensis]	47.9299	54.6574	35.4879	26.7774	21.7298	31.5539		Ce000011Fg68	14-3-3-like protein GF14-E [Carex littledalei]	277.598	342.125	283.607	138.015	82.6984	25.0599		Ce000023Fg169	receptor-like protein kinase [Carex littledalei]	10.3974	9.22849	14.3206	18.5622	22.7	8.70193		Ce000014Fg149	unnamed protein product [Ananas comosus var. bracteatus]	3.25634	3.21082	4.77905	7.42304	11.0266	12.5616
Ce000007Fg107	protein TIFY 10B-like protein [Carex littledalei]	415.044	361.312	234.002	49.9828	28.2488	27.0349		Ce000012Fg1	hypothetical protein DCAR_029956 [Daucus carota subsp. sativus]	21.6166	24.325	21.1027	19.3303	17.7509	9.47001		Ce000023Fg39	probable galactinol--sucrose galactosyltransferase 6 [Ananas comosus]	1.16046	3.74254	18.2049	58.5881	57.848	51.1405		Ce000014Fg166	translocase of chloroplast 159 [Carex littledalei]	18.9506	21.823	35.4652	49.4109	34.9401	60.9692
Ce000007Fg116	hypothetical protein FCM35_KLT12193 [Carex littledalei]	21.305	17.704	14.4165	9.6868	6.25899	2.08079		Ce000012Fg139	Pyruvate kinase [Carex littledalei]	513.674	955.438	1405.51	513.759	465.618	299.767		Ce000023Fg74	probable inactive nicotinamidase At3g16190 [Elaeis guineensis]	3.45984	7.4932	8.18989	13.0236	16.0004	11.3941		Ce000014Fg179	TspO_MBR domain-containing protein [Cephalotus follicularis]	9.0727	2.85065	10.1835	57.2856	124.257	480.202
Ce000007Fg121	ethylene-responsive transcription factor 1-like protein [Carex littledalei]	71.9569	32.005	28.4996	22.7809	25.9452	6.15306		Ce000012Fg153	hypothetical protein FCM35_KLT04235 [Carex littledalei]	39.9652	43.9869	32.1647	16.7138	18.4657	5.70057		Ce000023Fg8_Ce000023Fg9	uncharacterized protein LOC105060094 isoform X2 [Elaeis guineensis]	7.5583	11.3838	15.3066	15.3862	21.4252	2.1969		Ce000014Fg180	unnamed protein product [Microthlaspi erraticum]	14.0608	4.33098	7.70797	18.1286	25.7795	44.0723
Ce000007Fg123	AT-rich interactive domain-containing protein 4-like protein [Carex littledalei]	12.5998	8.57867	7.04616	9.12438	7.96361	5.79068		Ce000012Fg189	hypothetical protein FCM35_KLT20884 [Carex littledalei]	44.7593	46.6584	68.554	14.1579	6.51192	5.25231		Ce000024Fg120	50S ribosomal protein L1 [Carex littledalei]	6.46773	9.39994	14.6424	15.3277	15.9632	9.83274		Ce000014Fg194	Serine carboxypeptidase-like 2 [Carex littledalei]	4.79916	5.56009	4.59456	10.8706	8.57176	22.6921
Ce000007Fg129	Glycine dehydrogenase (decarboxylating) [Parasponia andersonii]	32.6785	25.4359	21.0129	10.0185	8.38193	6.34284		Ce000012Fg201	hypothetical protein FCM35_KLT20892 [Carex littledalei]	35.2417	123.647	146.188	38.1121	33.5525	12.5315		Ce000024Fg135	Protein PALE CRESS [Carex littledalei]	3.35482	2.4465	4.93615	16.0929	16.5564	10.8507		Ce000014Fg23	11-beta-hydroxysteroid dehydrogenase 1B-like protein [Carex littledalei]	0	0.135352	6.59226	9.05547	24.9244	33.2479
Ce000007Fg148	hypothetical protein FCM35_KLT12225 [Carex littledalei]	34.7322	37.7841	25.8565	18.266	14.9251	18.918		Ce000012Fg207	PB1 domain-containing protein [Carex littledalei]	20.6306	47.2598	34.6853	10.099	12.1726	25.189		Ce000024Fg158	biotin carboxylase 2 [Carex littledalei]	52.1969	78.6493	116.209	345.492	287.268	141.634		Ce000014Fg26	zinc finger protein 511 [Carex littledalei]	3.9437	2.24924	2.85732	5.46677	6.08338	8.07814
Ce000007Fg158	strictosidine synthase 3-like protein [Carex littledalei]	54.7033	23.2181	16.9591	15.4274	8.57886	5.96675		Ce000012Fg215	E3 ubiquitin ligase BIG BROTHER [Carex littledalei]	8.75612	17.6289	11.5311	3.27311	1.12032	0.384173		Ce000024Fg49	hypothetical protein FCM35_KLT19393 [Carex littledalei]	6.45921	7.27434	10.2384	23.1246	30.8525	11.8813		Ce000014Fg28	hypothetical protein F2Q70_00019547 [Brassica cretica]	25.9067	16.082	21.6351	33.8269	33.835	76.8714
Ce000007Fg159	hypothetical protein FCM35_KLT12235 [Carex littledalei]	54.8506	25.0345	19.8097	17.4312	15.1533	7.60137		Ce000012Fg44	acylpyruvase FAHD1 [Carex littledalei]	40.7281	48.1762	47.0415	32.8471	28.1659	17.0684		Ce000024Fg91	unnamed protein product [Ananas comosus var. bracteatus]	4.18036	5.08829	2.52432	10.2435	14.0443	9.87111		Ce000015Fg28	omega-6 fatty acid desaturase, endoplasmic reticulum isozyme 2-like protein [Carex littledalei]	80.2713	74.7018	172.772	2200.64	3151.57	2568.06
Ce000007Fg17	putative RNA-directed DNA polymerase [Medicago truncatula]	25.2143	7.37611	3.22716	2.49229	0.982688	1.12261		Ce000012Fg65	galactokinase isoform X2 [Carex littledalei]	33.322	56.9618	47.2336	20.2158	11.828	9.73354		Ce000025Fg108	hypothetical protein C4D60_Mb10t09700 [Musa balbisiana]	3.88113	4.89332	5.5365	8.45173	9.50031	8.93881		Ce000015Fg34	hypothetical protein FCM35_KLT08634 [Carex littledalei]	21.2165	53.8517	50.0612	224.425	344.184	514.579
Ce000007Fg173	RNA-binding region RNP-1 [Carex littledalei]	52.2929	22.7675	11.7329	2.78593	2.05817	1.85948		Ce000012Fg71	Glycogen synthase kinase-3 beta [Carex littledalei]	134.422	152.738	121.82	120.44	105.57	62.699		Ce000025Fg58	nucleoside diphosphate kinase B [Carex littledalei]	257.328	729.245	1492.81	1796.92	1171.58	448.531		Ce000015Fg43	Uncharacterized conserved protein (UCP030210) [Zea mays]	29.9961	27.8302	28.9508	35.1159	46.4657	96.6639
Ce000007Fg188	casein kinase II subunit beta isoform X1 [Carex littledalei]	21.035	17.3985	14.5932	15.9184	8.01674	7.25115		Ce000012Fg89	transmembrane protein 184B-like protein [Carex littledalei]	16.7572	16.3273	15.106	9.93406	7.35374	4.99419		Ce000025Fg72	Serine/threonine-protein kinase SAPK3 [Carex littledalei]	9.45472	7.31433	14.5746	40.039	42.1501	31.7167		Ce000015Fg68	Mitochondrial glycoprotein [Carex littledalei]	22.0071	24.9561	46.7678	67.5189	54.6824	97.7636
Ce000007Fg189	chaperone protein ClpD2 [Carex littledalei]	28.1744	15.4678	9.13687	6.25896	4.80956	5.78174		Ce000013Fg10	deoxynucleoside triphosphate triphosphohydrolase SAMHD1 isoform X1 [Carex littledalei]	18.964	46.3982	16.3116	7.43525	6.21462	7.75946		Ce000026Fg1	PREDICTED: glycine--tRNA ligase, chloroplastic/mitochondrial 2, partial [Oryza brachyantha]	4.19548	4.27615	4.44878	8.71977	6.4704	2.75677		Ce000015Fg7	selenoprotein O [Carex littledalei]	8.41541	8.63851	11.2779	14.8767	18.5356	54.6244
Ce000007Fg190	acetate--CoA ligase ACS [Carex littledalei]	96.9701	83.8936	86.0028	36.7174	28.8822	19.6034		Ce000013Fg105	hypothetical protein FCM35_KLT22147 [Carex littledalei]	6.26545	5.9716	12.5522	1.51288	1.20258	0.93072		Ce000026Fg119	rRNA-processing protein UTP23 [Carex littledalei]	8.41857	5.5307	9.63353	20.5956	14.6697	15.6701		Ce000016Fg109	Catalase active site-containing protein [Artemisia annua]	15.1722	10.4428	49.6149	233.054	243.072	311.822
Ce000007Fg194	hypothetical protein FCM35_KLT12272 [Carex littledalei]	41.8652	22.6873	27.5945	35.3239	42.6738	13.3576		Ce000013Fg121	protein SEC13 [Carex littledalei]	42.5048	43.0668	36.9174	17.8628	16.2507	14.667		Ce000026Fg124	eyes absent 4 [Carex littledalei]	30.8483	71.3987	77.9267	77.61	65.9499	45.8726		Ce000016Fg139	outer envelope pore protein 21B [Carex littledalei]	12.7542	11.054	18.3696	29.723	29.9657	42.6859
Ce000007Fg202	OTU domain-containing protein [Carex littledalei]	65.8252	29.6257	22.7971	7.78042	3.55968	2.72989		Ce000013Fg125	ocs element-binding factor 1-like protein [Carex littledalei]	250.284	590.356	356.332	302.51	218.721	258.813		Ce000026Fg127	hypothetical protein FCM35_KLT10971 [Carex littledalei]	25.8959	37.6456	44.8499	90.5572	95.7308	36.8891		Ce000016Fg144	E3 ubiquitin-protein ligase XB3-like protein [Carex littledalei]	152.264	156.129	139.317	465.614	606.189	514.341
Ce000007Fg203	respiratory burst oxidase protein C-like isoform X1 [Carex littledalei]	143.571	95.8176	52.2041	15.8085	14.8894	6.01364		Ce000013Fg150	bifunctional aspartate aminotransferase and glutamate/aspartate-prephenate aminotransferase-like isoform X1 [Carex littledalei]	64.0001	63.3897	58.4099	25.7203	18.7146	7.61084		Ce000026Fg144	hypothetical protein FCM35_KLT10985 [Carex littledalei]	2.79024	6.01869	15.5999	18.0132	29.3501	15.8754		Ce000016Fg156	heat shock cognate 70 kDa protein [Oryza sativa Japonica Group]	0.308348	8.83143	38.306	0.979692	7.03706	421.03
Ce000007Fg204	inositol polyphosphate multikinase beta-like protein [Carex littledalei]	18.9524	10.3887	10.6119	8.47983	8.70118	2.69914		Ce000013Fg23	unnamed protein product [Brassica rapa]	290.053	340.689	227.537	66.7934	33.4301	22.0237		Ce000026Fg183	uncharacterized protein LOC103697786 isoform X1 [Phoenix dactylifera]	1.79469	1.98119	1.91861	39.0674	56.5584	10.6331		Ce000016Fg160	Glyoxalase-like domain-containing protein [Carex littledalei]	0.9038	2.01896	22.4625	33.3151	90.0502	76.003
Ce000007Fg206	calnexin [Carex littledalei]	148.995	124.347	121.042	73.5547	55.3045	32.3312		Ce000013Fg24	hypothetical protein GOBAR_AA35475 [Gossypium barbadense]	313.782	348.324	249.786	72.1041	38.6338	32.3008		Ce000026Fg209	hypothetical protein FCM35_KLT11041 [Carex littledalei]	0.725262	0.259033	0.542924	23.9018	9.20497	5.98041		Ce000016Fg167	elongator complex protein 1 [Carex littledalei]	11.8569	5.20489	4.88423	11.0401	8.39556	20.4999
Ce000007Fg228	cytochrome b-c1 complex subunit Rieske-4 [Carex littledalei]	109.175	81.8928	62.5422	32.9962	28.25	25.4698		Ce000013Fg4	Paired amphipathic helix protein Sin3-like 3 [Carex littledalei]	16.9668	40.1362	45.9164	12.3577	10.3065	6.16978		Ce000026Fg30	ATP-dependent Clp protease proteolytic subunit-related protein 4 [Carex littledalei]	10.7458	10.9838	10.4309	26.0884	33.6583	16.2174		Ce000016Fg175	hypothetical protein FCM35_KLT03068 [Carex littledalei]	9.83101	4.47682	9.21554	38.6008	42.0268	73.029
Ce000007Fg232	protein BONZAI 1-like protein [Carex littledalei]	13.757	13.2401	11.1232	6.8882	5.9931	3.19662		Ce000013Fg44	uncharacterized protein LOC109830922 [Asparagus officinalis]	23.0894	33.9349	48.5256	14.243	28.2637	9.26022		Ce000026Fg32	putative enolase family protein isoform 1 [Carex littledalei]	246.16	487.038	865.655	1853.81	2253.53	665.266		Ce000016Fg80	hypothetical protein B296_00024068 [Ensete ventricosum]	17.2038	10.362	12.1738	24.5542	27.4658	47.0071
Ce000007Fg233	protein MEI2-like 4 isoform X2 [Carex littledalei]	60.2268	30.5125	26.0112	23.9978	17.7536	22.1439		Ce000013Fg54	hypothetical protein FCM35_KLT06113 [Carex littledalei]	35.0277	40.697	89.4074	41.2597	29.7824	9.29973		Ce000026Fg42	hypothetical protein FCM35_KLT10893 [Carex littledalei]	3.25958	3.40974	2.87302	7.34186	7.24394	6.97346		Ce000017Fg111	catalase isozyme B [Carex littledalei]	15.9174	8.48943	41.0165	186.209	210.962	324.804
Ce000007Fg238	ATP-dependent Clp protease ATP-binding subunit clpA CD4B [Carex littledalei]	107.339	66.9613	68.9199	51.2103	46.8521	78.1807		Ce000013Fg65	galactinol--sucrose galactosyltransferase [Carex littledalei]	7.85732	18.2705	13.0792	1.98882	1.74869	0.488831		Ce000026Fg55	homeobox protein BEL1 [Carex littledalei]	3.35334	0.695133	4.73056	17.4165	10.7645	4.25486		Ce000017Fg141	outer envelope pore protein 21B [Carex littledalei]	10.8317	10.2469	15.0233	25.4301	25.0983	39.4321
Ce000007Fg248	transport inhibitor response 1-like protein [Carex littledalei]	31.6932	29.2592	24.9765	24.0633	19.4061	13.4142		Ce000013Fg7	acetyl-CoA acetyltransferase [Carex littledalei]	17.9706	63.3364	66.8774	16.1811	11.4031	13.7955		Ce000026Fg70	protein REVEILLE 5-like isoform X2 [Carex littledalei]	12.9114	12.5412	20.4838	33.3387	30.9066	31.5345		Ce000017Fg160	hypothetical protein E2562_032981 [Oryza meyeriana var. granulata]	2.16203	24.0004	110.654	2.37915	32.1362	993.241
Ce000007Fg26	hypothetical protein EJB05_13113, partial [Eragrostis curvula]	27.1034	30.1969	13.9036	9.36571	7.85172	7.30421		Ce000014Fg117	unnamed protein product [Triticum turgidum subsp. durum]	55.5376	60.3556	45.5299	14.8704	11.3164	6.95797		Ce000026Fg71	trihelix transcription factor GTL1-like protein [Carex littledalei]	6.73328	8.33072	3.34734	11.3743	15.0671	9.45495		Ce000017Fg164	Glyoxalase-like domain-containing protein [Carex littledalei]	0.589333	1.49634	12.1916	42.0451	162.683	164.379
Ce000007Fg27	hypothetical protein FCM35_KLT13365 [Carex littledalei]	11.4656	6.82908	4.48337	5.11989	4.30117	3.17152		Ce000014Fg163_Ce000014Fg164	Ring finger domain-containing protein [Carex littledalei]	66.6228	104.306	125.048	47.4627	34.5454	10.9087		Ce000026Fg72	nitric oxide-associated protein [Carex littledalei]	4.98874	5.32279	8.1877	10.3546	8.51615	8.82178		Ce000017Fg171	elongator complex protein 1 [Carex littledalei]	7.69671	3.95192	3.9943	9.22326	7.85463	20.0369
Ce000007Fg74	Protein TRM32 [Carex littledalei]	20.2067	11.6842	8.76566	6.41755	4.73546	2.13049		Ce000014Fg165	thiamine pyrophosphokinase 1 isoform X2 [Carex littledalei]	7.83212	16.529	24.2369	8.27148	7.57495	4.93177		Ce000027Fg138	Photosynthetic NDH subunit of lumenal location 5 [Carex littledalei]	65.5605	62.2631	68.363	257.449	234.917	207.225		Ce000017Fg180	hypothetical protein FCM35_KLT03068 [Carex littledalei]	10.3117	4.41002	9.84672	36.4896	41.6844	59.4333
Ce000007Fg94	hypothetical protein FCM35_KLT12173 [Carex littledalei]	78.7303	17.3197	8.69152	2.78088	4.47194	1.43519		Ce000014Fg176	REF/SRPP-like protein [Carex littledalei]	483.112	730.044	892.517	442.062	430.496	167.48		Ce000027Fg152	NAC domain-containing protein 18-like protein [Carex littledalei]	46.3406	31.5826	79.2557	178.131	249.958	156.104		Ce000017Fg78	50S ribosomal protein L20 [Helianthus annuus]	13.007	9.8924	9.97375	19.7534	22.7209	40.7147
Ce000008Fg103	putative quinone-oxidoreductase [Carex littledalei]	30.1891	15.3195	13.4987	14.9404	12.4627	5.27405		Ce000014Fg18		3.40812	6.98264	0.791672	2.73922	2.13926	0.176115		Ce000027Fg7	hypothetical protein B456_002G183300 [Gossypium raimondii]	2.29558	3.20006	5.67163	8.66406	8.70094	6.24526		Ce000018Fg167	Glutathione S-transferase domain-containing protein [Carex littledalei]	12.4671	21.6717	25.6052	44.8328	47.2082	64.4533
Ce000008Fg112	hypothetical protein FCM35_KLT07838 [Carex littledalei]	24.4269	23.847	18.269	13.986	12.7219	7.10273		Ce000014Fg25	HVA22-like protein e [Carex littledalei]	9.74847	6.01417	20.2369	5.32039	8.76947	9.61474		Ce000028Fg130	Glutathione peroxidase [Corchorus capsularis]	1.61225	2.84968	4.90951	11.8007	13.163	8.43802		Ce000018Fg187	ribosome maturation protein SBDS [Carex littledalei]	14.1923	10.7536	20.1286	23.0883	32.6999	51.7433
Ce000008Fg113	hypothetical protein FCM35_KLT07837 [Carex littledalei]	17.9339	13.5714	13.8271	7.48211	6.98904	5.56554		Ce000014Fg82	solute carrier family 25 member 44-like protein [Carex littledalei]	4.11217	29.6615	31.5982	7.68321	10.8077	15.3167		Ce000028Fg143	PREDICTED: translation initiation factor IF-3, chloroplastic-like [Solanum tuberosum]	10.0722	16.4232	18.0876	22.3265	20.4433	12.3606		Ce000018Fg195	transcription initiation factor IIE subunit beta [Carex littledalei]	2.1371	1.54559	2.03347	4.42943	5.37863	7.27685
Ce000008Fg14	syntaxin-131 [Carex littledalei]	45.522	25.4085	20.3688	13.5118	13.1194	8.71705		Ce000014Fg91	Protein FAM18B [Carex littledalei]	35.0318	42.8685	34.3547	21.9471	16.9343	8.63953		Ce000028Fg4	uncharacterized protein LOC103704917 [Phoenix dactylifera]	3.91464	3.89207	5.51208	16.2271	19.1005	7.49214		Ce000018Fg196	class I heat shock protein-like protein [Carex littledalei]	3.77978	1.83374	5.28046	0.505605	6.21338	537.114
Ce000008Fg143	prolyl endopeptidase [Carex littledalei]	23.8677	12.1949	9.49716	6.57192	7.0827	6.45912		Ce000015Fg6	3-oxoacyl-[acyl-carrier-protein] reductase [Carex littledalei]	15.5419	169.355	172.625	4.07607	0.66043	0.0314683		Ce000028Fg42	hypothetical protein C4D60_Mb09t12910 [Musa balbisiana]	13.8064	6.73609	14.7474	19.2826	9.08922	1.81553		Ce000018Fg83	tubulin-folding cofactor A isoform X1 [Jatropha curcas]	22.2281	22.3518	20.9921	19.6653	28.6833	57.7962
Ce000008Fg176	Protein NUCLEAR FUSION DEFECTIVE 4 [Carex littledalei]	51.7782	12.6416	5.37007	3.84581	4.09967	2.61964		Ce000015Fg72	RNA-binding protein 38-like protein [Carex littledalei]	15.9673	19.1726	19.409	11.4375	7.80065	3.19185		Ce000028Fg43_Ce000028Fg44	hypothetical protein C4D60_Mb09t12910 [Musa balbisiana]	24.9796	2.01493	55.3024	69.9292	35.352	0.658068		Ce000018Fg96_Ce000018Fg97	uncharacterized protein LOC109710530 isoform X1 [Ananas comosus]	13.3191	22.7547	24.9939	38.4369	30.3558	58.3237
Ce000008Fg198	CBL-interacting protein kinase 1 isoform X1 [Carex littledalei]	101.611	79.6428	53.1574	12.0087	2.76973	1.02054		Ce000015Fg88	hypothetical protein FCM35_KLT12025 [Carex littledalei]	319.328	273.284	324.452	140.121	117.68	79.0804		Ce000029Fg109	fructokinase-like 1, chloroplastic [Elaeis guineensis]	5.8019	5.8099	8.3064	10.9412	13.7036	8.10148		Ce000020Fg116	elongation factor G-2 [Carex littledalei]	3.89012	5.27269	7.18082	16.2064	19.4422	19.9603
Ce000008Fg205	10-deacetylbaccatin III 10-O-acetyltransferase-like protein [Carex littledalei]	100.091	26.7499	86.2938	40.0581	20.3938	4.20456		Ce000015Fg93	Interferon-related developmental regulator 1 [Carex littledalei]	70.5729	101.41	166.97	48.6519	48.2519	35.8351		Ce000029Fg124	PREDICTED: uncharacterized protein LOC103982118 [Musa acuminata subsp. malaccensis]	4.54994	3.32649	5.25804	9.10363	10.2574	3.89262		Ce000020Fg119	vacuolar-processing enzyme beta-isozyme-like protein [Carex littledalei]	3.86118	5.28557	4.85448	14.9219	26.9392	66.7749
Ce000008Fg213	hypothetical protein C2845_PM14G04110 [Panicum miliaceum]	22.3277	18.9088	18.2713	15.2177	12.064	10.1284		Ce000016Fg120	hypothetical protein Lal_00021615 [Lupinus albus]	64.5093	212.765	271.916	27.0197	24.7608	18.9861		Ce000029Fg195	PREDICTED: uncharacterized protein LOC109160270 isoform X1 [Ipomoea nil]	3.33559	1.88762	3.82162	5.71067	7.63592	5.47039		Ce000020Fg132	putative 4-hydroxy-4-methyl-2-oxoglutarate aldolase 2 [Carex littledalei]	35.404	21.9211	17.4511	24.7216	31.3444	43.089
Ce000008Fg24	hypothetical protein FCM35_KLT03638 [Carex littledalei]	34.5773	10.1828	4.74453	4.04582	1.39926	2.60459		Ce000016Fg123	calcium-binding protein [Carex littledalei]	38.2939	37.0562	34.8147	22.0547	17.1353	12.4647		Ce000029Fg205	ABC transporter I family member 10 [Carex littledalei]	1.86368	6.26583	7.02036	6.83568	8.24759	5.09415		Ce000020Fg162	hypothetical protein FCM35_KLT13519 [Carex littledalei]	16.0847	11.416	6.79574	6.72081	10.9628	22.2578
Ce000008Fg25	sodium/hydrogen exchanger 2 isoform X1 [Carex littledalei]	24.2861	15.8871	14.1354	18.9553	15.467	6.76329		Ce000016Fg126	U-box domain-containing protein 44-like protein [Carex littledalei]	21.0679	15.8176	22.7159	10.1467	4.75013	1.21635		Ce000029Fg208	Protein PLASTID TRANSCRIPTIONALLY ACTIVE 12 [Carex littledalei]	3.93575	3.00139	3.76176	12.405	12.0563	9.67503		Ce000020Fg168	monothiol glutaredoxin-S11-like protein [Carex littledalei]	0	0	0.26231	0.4173	4.00248	19.111
Ce000008Fg29	conserved oligomeric Golgi complex subunit 8 [Carex littledalei]	19.1926	19.8085	14.3632	8.79095	7.7045	5.36591		Ce000016Fg142	putative metallothionin 2a [Carex littledalei]	1220.87	1116.52	2440.14	1668.05	1080.33	425.995		Ce000029Fg63	formimidoyltransferase-cyclodeaminase [Carex littledalei]	8.55071	13.2737	10.4059	19.6637	19.7054	9.24729		Ce000020Fg196	Serine carboxypeptidase-like 2 [Carex littledalei]	7.25874	4.21792	4.98613	10.5427	9.91389	20.6263
Ce000008Fg30	RING finger and CHY zinc finger domain-containing protein 1-like protein [Carex littledalei]	45.456	23.2151	11.0474	3.70305	1.77348	4.29958		Ce000016Fg15	putative receptor-like protein kinase [Carex littledalei]	59.7643	92.5551	103.658	23.5789	16.4183	6.37446		Ce000029Fg66	uncharacterized protein C2845_PM07G18720 [Panicum miliaceum]	2.51744	1.35686	1.69824	4.05664	5.7705	4.02568		Ce000020Fg23	subtilisin-like protease [Carex littledalei]	25.3808	20.1945	18.9887	32.536	32.801	52.3238
Ce000008Fg55	hypothetical protein DVH24_039747 [Malus domestica]	18.3023	14.2453	17.3339	16.9694	14.0996	7.67979		Ce000016Fg16	putative plant SNARE 11 isoform X1 [Carex littledalei]	20.5909	25.5479	17.7641	5.86806	4.93647	1.98418		Ce000029Fg67	putative receptor-like protein kinase [Carex littledalei]	7.99406	13.5611	7.97107	16.3827	25.9264	10.4302		Ce000020Fg34	zinc finger CCCH domain-containing protein 17-like protein [Carex littledalei]	26.3899	26.3741	25.1874	43.147	41.9337	59.0287
Ce000008Fg66	proteasome subunit beta type isoform 1 [Carex littledalei]	34.3102	27.8001	29.8567	22.2499	20.1386	12.3419		Ce000016Fg161	Protein SAWADEE HOMEOdomain-containing protein [Carex littledalei]	18.5237	22.478	19.3676	22.9952	18.1694	8.06954		Ce000029Fg8	unnamed protein product [Digitaria exilis]	24.0373	43.3614	50.4158	81.113	77.9584	22.2389		Ce000020Fg60	hypothetical protein FCM35_KLT13606 [Carex littledalei]	0.434304	0.321307	2.37347	52.1682	18.5807	41.434
Ce000008Fg79	TSL-kinase interacting protein 1 [Carex littledalei]	35.0016	19.6942	17.08	20.2904	25.3032	16.7932		Ce000016Fg162	hypothetical protein G4B88_015412 [Cannabis sativa]	583.786	665.486	460.352	68.4794	52.1081	26.2897		Ce000030Fg109	cyclic nucleotide-gated ion channel 4 [Carex littledalei]	1.45409	7.42881	11.7362	18.594	14.0464	8.09989		Ce000020Fg75	mitochondrial import inner membrane translocase subunit TIM23-1-like protein [Carex littledalei]	11.5233	11.4872	15.9525	23.4777	24.5216	43.4877
Ce000008Fg81	lysine--tRNA ligase-like isoform X2 [Carex littledalei]	115.728	80.4735	83.601	58.0945	43.5062	30.4669		Ce000016Fg169	Actin-depolymerizing factor 2 [Nymphaea thermarum]	177.106	227.391	179.921	79.9631	67.7673	36.7834		Ce000030Fg28	septum-promoting GTP-binding protein 1-like isoform X1 [Carex littledalei]	4.74017	4.48679	8.6931	12.1488	10.8014	5.55307		Ce000020Fg8	hypothetical protein FCM35_KLT15962 [Carex littledalei]	3.31186	1.4533	3.64547	3.36931	3.36401	8.49731
Ce000008Fg84	cytochrome b561 and DOMON domain-containing protein [Carex littledalei]	429.122	327.691	178.415	46.1121	25.4169	10.664		Ce000016Fg194	formin-like protein 11 isoform X1 [Carex littledalei]	3.02195	6.26975	1.64724	0.543756	0.066287	0		Ce000030Fg59	Glucose-6-phosphate/phosphate translocator 2 [Carex littledalei]	2.23593	15.9542	31.7968	173.13	164.512	51.3638		Ce000020Fg89	homeobox-leucine zipper protein ATHB-12-like protein [Carex littledalei]	7.2926	5.01426	8.67261	70.1451	139.308	434.012
Ce000008Fg89	Ras-related protein RABA5c [Carex littledalei]	79.1298	93.6372	51.8592	19.7899	18.0315	11.7917		Ce000016Fg2	lysophospholipid acyltransferase LPEAT2 [Carex littledalei]	47.5006	80.2287	64.4902	22.8949	17.5512	16.3254		Ce000030Fg60	unnamed protein product [Triticum turgidum subsp. durum]	40.5374	561.643	510.072	1104.57	1001.57	142.737		Ce000021Fg118	S-adenosyl-L-methionine-dependent tRNA 4-demethylwyosine synthase-like isoform X2 [Carex littledalei]	9.35515	5.95951	8.09482	26.1022	25.8406	48.011
Ce000008Fg91	Horcolin [Carex littledalei]	1785.77	695.669	335.365	1.01397	2.3285	0.114537		Ce000016Fg23	hypothetical protein FCM35_KLT01831 [Carex littledalei]	22.7706	49.5236	44.143	14.0423	9.79936	5.70715		Ce000031Fg20	hypothetical protein FCM35_KLT17610 [Carex littledalei]	2.52724	3.28121	9.19006	7.12185	10.5497	7.43909		Ce000021Fg14	ribonucleoprotein [Carex littledalei]	0.683266	0.615833	0.846183	5.35537	6.51107	10.9831
Ce000008Fg94	transcription factor bHLH62-like protein [Carex littledalei]	68.7124	51.1989	48.9691	32.6491	25.5656	6.96981		Ce000016Fg26	putative magnesium transporter NIPA6 isoform X1 [Carex littledalei]	24.2476	30.0151	20.4713	11.6023	8.41835	7.84966		Ce000031Fg24	cation transport regulator-like protein 2 [Carex littledalei]	352.386	511.69	340.153	1103.47	661.967	783.275		Ce000021Fg143	alpha N-terminal protein methyltransferase 1 [Carex littledalei]	23.4414	9.26181	8.83302	32.2079	27.6872	44.474
Ce000008Fg96	hypothetical protein CMV_011708 [Castanea mollissima]	65.2646	56.0298	45.3457	29.9703	37.9645	20.6857		Ce000016Fg29	chaperone protein dnaJ 11, chloroplastic [Elaeis guineensis]	644.576	980.301	1217.59	895.336	841.813	246.652		Ce000031Fg26	hypothetical protein FCM35_KLT17609 [Carex littledalei]	0.388885	0.578289	1.42004	5.95614	8.69797	6.71023		Ce000021Fg160	DEAD-box ATP-dependent RNA helicase like [Actinidia chinensis var. chinensis]	28.5137	11.9259	15.5843	36.7409	40.451	43.5112
Ce000009Fg107	hypothetical protein C2845_PM01G35000 [Panicum miliaceum]	69.8837	42.8059	34.218	43.6449	44.6562	30.3071		Ce000016Fg32	endoplasmin [Carex littledalei]	103.011	107.783	85.846	46.257	40.932	16.5784		Ce000031Fg49	StAR-related lipid transfer protein 7 [Carex littledalei]	11.8145	29.0342	47.5176	103.991	79.5865	32.2401		Ce000021Fg171	serine/threonine-protein kinase TOR isoform X2 [Ananas comosus]	42.1553	34.3783	46.5456	98.2291	79.686	123.738
Ce000009Fg118		13.6875	13.5458	9.09819	6.70517	6.78677	4.00536		Ce000016Fg47	protein MID1-COMPLEMENTING ACTIVITY 1 [Carex littledalei]	32.2827	85.4229	66.8221	41.74	27.4628	21.9646		Ce000032Fg123	cell number regulator 6-like protein [Carex littledalei]	1.89523	3.86824	4.89929	7.98943	8.67441	6.39528		Ce000021Fg44	Aspartic proteinase oryzasin-1 [Carex littledalei]	10.6653	7.10186	9.57191	26.4505	23.6983	29.4791
Ce000009Fg127	Cation/calcium exchanger 1 [Carex littledalei]	17.4994	8.63422	7.86184	3.57197	5.5575	4.97583		Ce000016Fg71	hypothetical protein FCM35_KLT01797 [Carex littledalei]	12.2696	13.8203	13.5693	10.789	10.0388	6.00935		Ce000032Fg33	Phosphomannomutase/phosphoglucomutase [Carex littledalei]	24.3504	23.5668	32.3612	66.6051	72.288	48.5758		Ce000022Fg137	cyanate hydratase [Carex littledalei]	7.0378	1.59434	4.40224	12.0029	15.6233	24.488
Ce000009Fg140	glutamate dehydrogenase-like protein [Carex littledalei]	40.6899	12.0797	11.2847	10.1156	3.85644	1.08636		Ce000016Fg72	RNA pseudouridine synthase 2 [Carex littledalei]	3.93516	8.14677	10.9556	4.43572	4.9503	2.52749		Ce000032Fg35	nucleolar protein 58-like protein [Carex littledalei]	173.22	336.453	420.901	478.828	300.53	69.6214		Ce000022Fg148	non-lysosomal glucosylceramidase-like protein [Carex littledalei]	5.97622	2.72515	4.56574	7.81961	11.0781	20.8446
Ce000009Fg51	ureidoglycolate hydrolase [Carex littledalei]	29.9018	24.4789	18.366	16.7341	14.696	11.1737		Ce000017Fg118	transport and Golgi organization 2 [Carex littledalei]	20.7687	29.603	170.011	56.888	41.3647	49.9853		Ce000032Fg72	glucose-1-phosphate adenylyltransferase large subunit 3 [Carex littledalei]	1.78397	7.8143	10.2355	19.7556	19.2964	1.86193		Ce000022Fg174	Glutelin type-A 1 [Carex littledalei]	11.8098	0.471006	4.75472	94.3455	105.359	139.3
Ce000009Fg69	Phosphatidylcholine transfer protein [Carex littledalei]	81.0515	90.4087	53.3966	46.7373	32.0519	18.9159		Ce000017Fg123	Eukaryotic translation initiation factor 6-2, partial [Glycine soja]	101.221	365.597	470.548	44.9235	41.2038	38.773		Ce000032Fg9	putative folate-biopterin transporter 9 [Carex littledalei]	1.83736	12.4716	19.3726	10.5394	18.1459	13.2741		Ce000022Fg176	1-aminocyclopropane-1-carboxylate oxidase 1-like protein [Carex littledalei]	1.86882	0.154464	0.252116	2.17301	3.68109	15.8955
Ce000010Fg116	protein disulfide isomerase-like 5-4 isoform X1 [Carex littledalei]	35.0434	36.1564	23.9889	17.9557	16.3959	8.34327		Ce000017Fg144	putative metallothionin 2a [Carex littledalei]	1255.09	1146.54	2507.27	1714.16	1114.31	444.987		Ce000032Fg91	hypothetical protein EJB05_46655 [Eragrostis curvula]	1.34598	2.47522	8.26794	13.8489	7.04551	4.94581		Ce000022Fg27	elongator complex protein 2 [Carex littledalei]	8.19582	3.75942	4.91079	12.4676	10.2389	17.2254
Ce000010Fg127	TBC1 domain family member 15 isoform X1 [Carex littledalei]	16.9237	10.7822	6.08272	3.45234	3.25754	2.00503		Ce000017Fg165	Protein SAWADEE HOMEOdomain-containing protein [Carex littledalei]	19.2236	24.2769	20.2371	23.0301	16.3515	8.14258		Ce000033Fg38		8.55882	6.66091	6.25974	17.0836	14.3638	14.5576		Ce000022Fg61	serine/arginine-rich splicing factor RSZ21A isoform X1 [Carex littledalei]	6.36412	3.69176	8.6231	9.64277	11.8611	18.742
Ce000010Fg148	cyclic nucleotide-gated ion channel 9 [Carex littledalei]	41.1902	32.6018	26.2259	18.1059	16.3074	14.8352		Ce000017Fg166	d-TDP-glucose dehydratase [Carex littledalei]	383.718	461.442	315.627	40.0803	31.1647	13.5154		Ce000033Fg54	COMPASS-like H3K4 histone methylase component WDR5B [Carex littledalei]	9.01666	5.80361	7.54582	20.3949	15.5737	12.8875		Ce000022Fg62	hypothetical protein BAE44_0011831 [Dichanthelium oligosanthes]	2.67213	2.57164	3.22632	4.50761	6.4872	6.06315
Ce000010Fg197	histone H2B.11 [Oryza sativa Japonica Group]	187.783	118.558	99.61	79.3439	90.8992	67.9852		Ce000017Fg173	actin-depolymerizing factor 7 [Nymphaea colorata]	395.075	533.324	430.554	200.086	179.333	97.1526		Ce000034Fg117	hypothetical protein FCM35_KLT08065 [Carex littledalei]	59.5548	83.3878	167.408	378.285	413.703	293.292		Ce000022Fg71	grpE protein [Carex littledalei]	13.435	20.4889	30.417	73.6633	81.2876	113.967
Ce000010Fg202	protein TOPLESS-like protein [Carex littledalei]	80.8703	61.5084	48.1309	39.016	31.5111	32.8394		Ce000017Fg19	putative receptor-like protein kinase [Carex littledalei]	157.773	223.846	214.538	40.5663	32.4308	14.6777		Ce000034Fg118		8.71712	11.618	26.6888	57.792	55.2405	29.4999		Ce000022Fg81	inosine triphosphate pyrophosphatase [Gossypium australe]	8.20538	6.80366	6.65073	14.6208	20.5771	19.1309
Ce000010Fg45	Senescence regulator [Carex littledalei]	87.9881	42.9454	14.488	4.29061	2.90363	4.04314		Ce000017Fg195	hypothetical protein EJB05_07112 [Eragrostis curvula]	18.9907	31.6233	31.3992	20.3132	14.7011	7.97008		Ce000034Fg143	putative protein phosphatase 2C 62 [Carex littledalei]	61.4548	52.0541	70.3588	138.832	145.484	84.2064		Ce000022Fg85	hypothetical protein EJB05_22089 [Eragrostis curvula]	3.22897	2.29663	13.3903	9.14961	12.3311	25.1354
Ce000010Fg46	beta-expansin 1 [Carex littledalei]	214.492	9.37108	3.72235	0.0904063	0.398344	0		Ce000017Fg2	lysophospholipid acyltransferase LPEAT2 [Carex littledalei]	44.1683	67.5346	53.4686	21.5303	17.5375	19.2017		Ce000034Fg144	inositol-3-phosphate synthase-like protein [Carex littledalei]	128.39	118.182	129.512	420.824	463.272	139.832		Ce000023Fg100	threonine synthase [Carex littledalei]	48.5649	42.8148	36.5026	51.6929	57.9971	132.594
Ce000010Fg93	transmembrane protein 97-like protein [Carex littledalei]	66.3531	60.5144	52.6197	46.3508	42.6156	29.2687		Ce000017Fg29	putative magnesium transporter NIPA6 isoform X1 [Carex littledalei]	20.7278	24.1643	18.5191	10.6737	10.0327	9.67073		Ce000034Fg30	ethylene-responsive transcription factor 1-like isoform X2 [Phoenix dactylifera]	88.0216	58.4619	92.1309	285.745	170.954	87.3786		Ce000023Fg105	putative clathrin assembly protein [Carex littledalei]	46.0996	48.6451	54.7719	53.884	52.6016	150.329
Ce000011Fg139	Disease resistance protein RPP13 [Carex littledalei]	152.078	8.35418	3.69862	2.33397	1.88994	0.40287		Ce000017Fg3	hypothetical protein FCM35_KLT01849 [Carex littledalei]	20.6297	25.5049	17.0573	7.1613	7.92743	4.11289		Ce000034Fg39	phytoene dehydrogenase [Carex littledalei]	4.39995	14.7799	14.9824	28.8493	22.9069	12.9236		Ce000023Fg132	hypothetical protein FCM35_KLT08299 [Carex littledalei]	20.3606	30.4814	31.7236	18.6406	22.2707	55.6551
Ce000011Fg142	hypothetical protein BHM03_00003735 [Ensete ventricosum]	22.9141	15.3622	12.1457	7.83665	6.62715	3.57103		Ce000017Fg30	uncharacterized protein LOC109727483 [Ananas comosus]	44.3883	50.4755	38.5564	10.152	9.07935	4.80831		Ce000034Fg41	unnamed protein product [Triticum turgidum subsp. durum]	59.8264	30.8998	41.385	75.1186	33.5578	27.1021		Ce000023Fg150	phytanoyl-CoA dioxygenase isoform X2 [Nymphaea colorata]	27.731	19.9094	23.2316	52.7466	54.1405	80.437
Ce000011Fg149	protein PIR [Carex littledalei]	19.2063	19.653	13.8953	9.12952	8.38995	4.33744		Ce000017Fg32	chaperone protein dnaJ 11, chloroplastic [Elaeis guineensis]	452.96	635.403	790.496	605.324	593.183	192.701		Ce000034Fg45	putative calcium-binding protein CML8 [Carex littledalei]	20.4265	25.5562	151.235	318.509	349.21	324.695		Ce000023Fg155	hypothetical protein C4D60_Mb04t25680 [Musa balbisiana]	5.00456	4.23912	5.29641	8.09347	8.45939	11.2448
Ce000011Fg153	homeobox-leucine zipper protein HOX21-like isoform X2 [Carex littledalei]	54.2461	16.2682	8.99213	3.56809	3.02481	1.60335		Ce000017Fg50	anther-specific proline-rich protein APG-like protein [Carex littledalei]	52.2958	50.8949	48.4633	26.4286	25.32	20.5902		Ce000034Fg62	hypothetical protein FCM35_KLT08125 [Carex littledalei]	4.20328	3.90333	6.15116	8.63618	8.768	5.53884		Ce000023Fg159	cationic amino acid transporter 2, vacuolar-like isoform X2 [Carex littledalei]	9.44397	8.40738	10.2536	21.7075	21.7824	24.0573
Ce000011Fg169	DCN1-like protein 1 [Carex littledalei]	27.9526	24.1034	25.739	18.0041	13.4836	10.8684		Ce000018Fg10	3-ketoacyl-CoA synthase 12-like protein [Carex littledalei]	20.5289	111.552	45.0849	4.63789	3.08102	0.886026		Ce000034Fg70	protein DCL [Carex littledalei]	11.8332	18.7907	20.4018	26.4952	19.2136	15.1331		Ce000023Fg160	unnamed protein product [Triticum turgidum subsp. durum]	10.2467	8.61016	11.3275	20.7199	20.9849	31.8245
Ce000011Fg211	putative trehalose-phosphate phosphatase 6 [Carex littledalei]	105.531	70.0291	100.97	102.012	99.7494	21.2933		Ce000018Fg114	Pyruvate kinase, cytosolic isozyme [Apostasia shenzhenica]	2.47534	6.00606	15.6362	0.250038	0.407377	0		Ce000034Fg78	transport inhibitor response 1-like protein [Carex littledalei]	11.8985	10.4359	12.7479	34.4903	44.7338	16.4084		Ce000023Fg89	Cytidylyltransferase-like protein [Carex littledalei]	15.1264	12.0737	11.1382	18.7495	17.8998	32.7054
Ce000011Fg215	hypothetical protein FCM35_KLT12988 [Carex littledalei]	90.8932	52.4406	42.166	36.9409	35.6348	23.4502		Ce000018Fg197	cell wall / vacuolar inhibitor of fructosidase 2-like protein [Carex littledalei]	3.341	7.59511	2.37144	0	0	0		Ce000035Fg10	50S ribosomal protein L34 [Carex littledalei]	7.81633	16.7281	19.6634	21.3984	20.6453	10.1042		Ce000024Fg10	pentatricopeptide repeat-containing protein [Carex littledalei]	3.72992	2.71127	3.29263	7.80949	7.86238	10.7582
Ce000011Fg222	copper-transporting ATPase PAA1 [Carex littledalei]	28.7264	13.0017	5.57732	1.49003	2.41922	1.90369		Ce000018Fg73	hypothetical protein EE612_014452 [Oryza sativa]	6.49912	8.88104	15.958	12.2261	8.26348	3.29951		Ce000035Fg134	ATP synthase protein I [Carex littledalei]	3.28453	5.01092	5.09615	10.9805	9.49104	4.34004		Ce000024Fg17	hypothetical protein FCM35_KLT19310 [Carex littledalei]	0.509527	0.0968157	2.88013	18.7906	57.8438	338.562
Ce000011Fg23	unnamed protein product [Ananas comosus var. bracteatus]	99.5845	95.3861	83.2618	38.4922	46.0368	67.1045		Ce000018Fg76	bifunctional riboflavin kinase/FMN phosphatase [Carex littledalei]	13.1034	14.4388	12.9845	10.6152	9.81875	6.43599		Ce000035Fg135	hypothetical protein FCM35_KLT20109 [Carex littledalei]	0	17.9878	10.4588	16.9339	4.86576	11.9759		Ce000024Fg22	hypothetical protein FCM35_KLT19328 [Carex littledalei]	3.57829	5.39254	4.56436	7.48144	7.04392	8.58915
Ce000011Fg244	ras-related protein Rab11D-like isoform X1 [Carex littledalei]	470.5	252.949	152.801	23.6886	18.0569	8.2468		Ce000018Fg78	CLIP-associated protein isoform X2 [Oryza sativa Japonica Group]	3.28274	6.62571	7.30397	1.54952	0.838413	0.267321		Ce000035Fg35	Dihydropyrimidinase [Triticum urartu]	45.2552	16.7225	16.436	26.8116	51.3332	30.6166		Ce000024Fg28	F-box/LRR-repeat protein 12 [Carex littledalei]	7.44946	6.77373	7.19162	8.72652	10.1888	15.106
Ce000011Fg245	F-box protein [Carex littledalei]	22.9721	18.4353	17.5244	11.4991	8.94841	4.05936		Ce000018Fg79	hypothetical protein ACMD2_26420 [Ananas comosus]	26.5697	61.184	35.0003	12.0483	1.75223	0.241374		Ce000035Fg56	uncharacterized protein LOC110803185 [Spinacia oleracea]	1.76429	3.41149	3.38193	13.6531	10.8424	6.99705		Ce000024Fg34	DNA excision repair protein ERCC-6-like isoform X1 [Carex littledalei]	11.6684	5.49965	5.41032	8.22909	9.22658	8.85532
Ce000011Fg258	ADP-ribosylation factor-related protein 1 [Ananas comosus]	14.2467	14.0499	9.91513	7.62474	6.90877	3.86706		Ce000018Fg84	unnamed protein product [Triticum turgidum subsp. durum]	28.1657	74.9292	96.9048	44.7262	42.6739	8.98891		Ce000035Fg92	hypothetical protein FCM35_KLT03990 [Carex littledalei]	7.08903	4.90613	16.6215	18.8502	18.1509	8.7594		Ce000024Fg45	crossover junction endonuclease MUS81 isoform X1 [Carex littledalei]	1.94888	0.970654	1.378	3.26255	3.64181	6.46008
Ce000011Fg269	trafficking protein particle complex subunit 5 [Carex littledalei]	17.6855	15.2796	13.2207	9.31179	9.05238	6.00159		Ce000018Fg95	myosin-6-like protein [Carex littledalei]	18.5965	39.6982	22.1773	6.07993	3.00148	1.76967		Ce000036Fg87	vacuolar protein 8-like protein [Carex littledalei]	6.67183	5.76224	4.98255	12.6146	18.8751	5.49616		Ce000024Fg47	hypothetical protein FCM35_KLT19370 [Carex littledalei]	6.19464	8.32204	8.62113	12.0202	9.50819	14.1043
Ce000011Fg33	E3 ubiquitin ligase SUD1 [Carex littledalei]	72.5161	51.7014	62.7307	29.2307	24.7044	16.3488		Ce000018Fg98	monodehydroascorbate reductase [Carex littledalei]	230.687	223.566	192.915	48.8857	45.2396	36.3567		Ce000037Fg145	enhancer of rudimentary isoform X1 [Carex littledalei]	8.7357	6.0981	9.73325	21.4581	18.9299	11.1169		Ce000024Fg65_Ce000024Fg66	CSC1-like protein [Carex littledalei]	3.63352	1.42164	3.40041	7.88671	13.6241	16.5476
Ce000011Fg76	dynamin-2A-like protein [Carex littledalei]	34.8111	29.2076	18.2242	7.22405	6.49211	3.62803		Ce000020Fg105	Kinesin-like protein NACK2 [Carex littledalei]	16.0982	20.5694	15.2149	11.7224	6.78578	2.83045		Ce000037Fg57_Ce000037Fg58	unnamed protein product [Triticum turgidum subsp. durum]	3.72266	7.96528	10.0507	30.9415	28.1319	18.4296		Ce000024Fg70	unnamed protein product [Ananas comosus var. bracteatus]	24.5184	22.3606	28.8221	65.3118	76.6222	159.459
Ce000011Fg95	Serine/arginine-rich splicing factor [Nymphaea thermarum]	82.9224	69.1478	68.3257	63.4073	43.0312	33.3074		Ce000020Fg109	autophagy-related protein 13-like isoform X2 [Carex littledalei]	21.2088	18.3762	28.9962	14.3856	15.9135	9.82142		Ce000037Fg61	hypothetical protein FCM35_KLT06817 [Carex littledalei]	3.31176	5.7649	5.73708	9.42095	10.7048	2.21438		Ce000024Fg8	eukaryotic translation initiation factor 5B-like protein [Carex littledalei]	7.73648	6.51746	6.65382	12.5916	14.1451	15.4266
Ce000012Fg100	protein phosphatase 2C 70 [Setaria italica]	38.4208	28.6897	19.3328	12.1056	9.93948	7.77424		Ce000020Fg128	Aspartic proteinase nepenthesin-1 [Carex littledalei]	34.6385	98.2832	78.7836	17.7913	7.22825	0.79441		Ce000038Fg83	50S ribosomal protein L17 [Carex littledalei]	26.102	50.496	49.9898	74.8978	62.3229	31.1199		Ce000025Fg139	hypothetical protein EJB05_01387, partial [Eragrostis curvula]	58.4385	73.2073	66.2137	88.2953	109.276	159.799
Ce000012Fg101	basic helix-loop-helix protein A isoform X4 [Carex littledalei]	32.8088	24.4839	13.906	10.3892	8.85407	4.62583		Ce000020Fg143	Heavy-metal-associated domain-containing protein [Carex littledalei]	15.1105	20.4869	30.9746	18.2325	29.3478	8.57514		Ce000039Fg149	reticulon-like protein B1-like protein [Carex littledalei]	162.326	208.372	250.426	289.399	370.697	286.46		Ce000025Fg146	LETM1 and EF-hand domain-containing protein 1 [Carex littledalei]	10.6873	15.8214	15.7921	14.443	19.5663	24.7502
Ce000012Fg122	SEC12-like protein 2 isoform X1 [Carex littledalei]	68.7101	54.0825	46.4503	37.6599	36.5972	25.6518		Ce000020Fg149	transcription factor LAF1-like protein [Carex littledalei]	52.7217	136.001	61.9469	12.1036	2.93228	1.41728		Ce000039Fg58	hypothetical protein FCM35_KLT05611 [Carex littledalei]	8.36933	21.7204	20.6277	22.9534	21.7161	12.9613		Ce000025Fg150	Transcription initiation factor IIB [Carex littledalei]	17.8373	14.4308	19.0891	32.4284	39.1045	64.1988
Ce000012Fg123	peptidyl-prolyl cis-trans isomerase CYP22 [Carex littledalei]	26.6024	20.0702	20.2907	16.9497	19.5342	12.1174		Ce000020Fg163	galacturonosyltransferase-like 3 [Carex littledalei]	14.9949	15.4303	19.2869	5.56339	5.32502	6.51575		Ce000040Fg102	DNA-directed RNA polymerase III subunit RPC2 [Carex littledalei]	4.43318	1.80913	3.11367	10.8313	9.22809	8.96773		Ce000025Fg22	DnaJ protein like [Dendrobium catenatum]	589.916	435.297	442.763	1954.13	2305.66	2822.94
Ce000012Fg124	acyl carrier protein 1 [Carex littledalei]	72.3277	56.7869	47.5292	32.9445	34.2406	21.4427		Ce000020Fg166	RING finger protein 185 [Carex littledalei]	95.8833	109.168	141.715	88.2221	70.4277	23.1008		Ce000040Fg106	crocetin glucosyltransferase 2-like isoform X2 [Carex littledalei]	0.801781	0.5419	2.09411	4.24647	7.37021	2.17046		Ce000025Fg24	putative quinone oxidoreductase [Carex littledalei]	80.5769	158.807	126.366	108.007	117.314	207.969
Ce000012Fg131	putative DNA gyrase subunit A [Carex littledalei]	21.0477	8.66924	7.83974	17.9347	15.1146	9.19421		Ce000020Fg177	ultraviolet-B receptor UVR8-like protein [Carex littledalei]	24.9799	48.5763	42.3035	9.03579	8.55892	4.61869		Ce000040Fg147	hypothetical protein Saspl_000635 [Salvia splendens]	3.8915	3.72606	4.04399	8.90904	7.22877	6.57169		Ce000025Fg28	putative Myb-related protein [Carex littledalei]	129.188	106.795	104.372	186.666	184.144	543.71
Ce000012Fg132	60S ribosomal protein L24-2 [Zea mays]	467.916	347.136	376.559	333.237	240.587	163.831		Ce000020Fg178	CBS domain-containing protein CBSX5-like protein [Carex littledalei]	61.6689	184.884	154.492	15.8766	7.17575	1.45614		Ce000040Fg149	uncharacterized protein LOC103706976 [Phoenix dactylifera]	6.76804	8.16583	9.74964	22.0464	24.9236	19.426		Ce000025Fg37	exosome complex component MTR3 [Carex littledalei]	44.0332	18.8479	21.042	50.0273	44.3485	71.3262
Ce000012Fg135	hypothetical protein FCM35_KLT15793 [Carex littledalei]	18.9903	9.75976	9.52783	8.87838	4.56856	8.23851		Ce000020Fg53	protein IQ-DOMAIN 1-like protein [Carex littledalei]	16.3218	48.589	43.1988	38.3637	39.1485	8.4101		Ce000040Fg96	60S ribosomal protein L7-2-like protein [Carex littledalei]	25.0026	20.0607	24.1252	51.7447	30.0834	33.7446		Ce000025Fg44	ethylene-responsive transcription factor 5-like protein [Carex littledalei]	29.9518	7.11399	4.99151	8.86078	14.7031	26.4732
Ce000012Fg136	PREDICTED: UDP-D-apiose/UDP-D-xylose synthase 2-like [Nicotiana attenuata]	326.728	276.651	163.733	30.4139	15.9841	4.62587		Ce000020Fg59	Heat shock transcription factor B2A [Carex littledalei]	27.1731	52.1107	95.7078	4.67836	3.99216	18.5045		Ce000041Fg115	uncharacterized protein At4g15970-like [Ananas comosus]	47.177	78.7319	137.42	187.72	140.203	7.83161		Ce000025Fg64	mediator of RNA polymerase II transcription subunit 31-like protein [Carex littledalei]	42.0941	36.9214	43.6423	98.4956	111.043	208.077
Ce000012Fg152	nuclear ribonuclease Z-like isoform X1 [Carex littledalei]	11.1705	7.02537	5.36748	5.32933	4.40848	5.73932		Ce000020Fg77	hypothetical protein AXF42_Ash006344 [Apostasia shenzhenica]	35.194	39.6083	28.8503	12.0578	10.6945	3.35021		Ce000041Fg18	uncharacterized protein C2845_PM04G07660 [Panicum miliaceum]	18.0631	16.703	41.0826	24.6838	23.2171	27.7985		Ce000025Fg81	vacuolar protein sorting-associated protein 13A [Carex littledalei]	49.8289	21.7505	26.2195	64.0568	66.3619	123.334
Ce000012Fg158	F-box protein SKIP16 [Carex littledalei]	25.3855	12.4049	10.4055	9.30483	11.3497	18.6695		Ce000021Fg105	rop guanine nucleotide exchange factor 14 [Carex littledalei]	14.9903	41.4342	29.8312	5.42878	1.86926	0.036334		Ce000041Fg88	glucose-6-phosphate 1-dehydrogenase 2 [Carex littledalei]	54.6816	47.1109	51.577	96.4932	75.0519	24.2616		Ce000026Fg106	Retrovirus-related Pol polyprotein LINE-1 [Zea mays]	115.875	22.9456	38.9698	128.833	97.025	212.311
Ce000012Fg159	putative transcription factor PosF21 [Carex littledalei]	46.114	37.4691	24.3607	19.1373	18.1496	8.8748		Ce000021Fg109	protein notum [Carex littledalei]	34.6864	109.876	98.0557	18.6802	2.62679	0.0176387		Ce000042Fg19	phosphoglucan phosphatase LSF1 [Carex littledalei]	21.2331	29.8795	27.4965	37.01	44.807	33.3419		Ce000026Fg125	late embryogenesis abundant protein D-113 [Carex littledalei]	0.874945	4.43421	34.1436	102.837	136.841	382.308
Ce000012Fg160	ER membrane protein complex subunit 10-like protein [Carex littledalei]	42.1007	28.6571	27.9922	19.3672	17.0654	12.3493		Ce000021Fg111	maltose excess protein 1-like [Carex littledalei]	9.69184	40.2415	37.6962	30.6536	21.5727	7.5579		Ce000042Fg20	2-methylene-furan-3-one reductase-like protein [Carex littledalei]	1.23359	7.47059	5.17732	4.96654	6.97025	4.3661		Ce000026Fg143	DnaJ subfamily C member 16 [Carex littledalei]	3.24757	2.07346	2.60761	4.5095	6.91122	9.2095
Ce000012Fg162	B-box zinc finger protein 24 [Carex littledalei]	21.1966	2.71075	8.98028	11.125	10.1679	9.15308		Ce000021Fg139	Actin-depolymerizing factor 6 [Morella rubra]	89.3977	244.374	186.366	154.191	167.433	151.642		Ce000042Fg25	uncharacterized protein LOC105057684 [Elaeis guineensis]	9.26204	10.483	11.3621	21.251	19.2838	9.71225		Ce000026Fg150	pentatricopeptide repeat-containing protein [Carex littledalei]	1.79958	0.802884	1.67238	4.98412	4.23113	5.64329
Ce000012Fg176	cytochrome P450 71A1-like protein [Carex littledalei]	31.9697	20.0488	15.501	6.73869	1.26945	0.447267		Ce000021Fg140	inosine-5'-monophosphate dehydrogenase-like protein [Carex littledalei]	72.4414	112.852	53.6282	18.4523	11.4323	11.9723		Ce000042Fg31	hypothetical protein C2845_PM04G15220 [Panicum miliaceum]	2.47807	1.58813	2.2058	6.91127	5.77655	5.08728		Ce000026Fg151	SMG9-like protein [Zea mays]	12.7983	6.81968	6.06839	17.9338	16.2674	22.3425
Ce000012Fg177	E3 ubiquitin-protein ligase RGLG2-like protein [Carex littledalei]	83.7413	56.0228	67.8917	48.0274	20.1421	11.732		Ce000021Fg141	Tubulin beta-5 chain [Hordeum vulgare]	255.089	318.525	199.187	17.9906	13.1508	14.6996		Ce000043Fg142	hypothetical protein OsJ_02894 [Oryza sativa Japonica Group]	42.7817	46.8241	52.4642	87.3691	72.9212	38.2715		Ce000026Fg156	ruBisCO large subunit-binding protein subunit beta [Carex littledalei]	98.9648	156.381	171.729	243.895	226.236	284.527
Ce000012Fg181	alpha/beta hydrolase domain-containing protein 17B-like protein [Carex littledalei]	22.3975	17.0124	13.2897	7.77459	9.8541	3.26397		Ce000021Fg159	hypothetical protein TEA_014424 [Camellia sinensis var. sinensis]	88.4524	85.4153	78.2465	45.9721	41.7484	22.6911		Ce000043Fg25	tRNA-dihydrouridine(47) synthase [Carex littledalei]	2.25477	2.34969	3.12449	6.5495	5.88217	4.43169		Ce000026Fg163	hypothetical protein FCM35_KLT10999 [Carex littledalei]	6.25724	5.04235	5.06597	7.34125	7.48018	16.1305
Ce000012Fg187	hypothetical protein GIB67_006968 [Kingdonia uniflora]	18.7904	14.6386	14.1591	10.0457	9.20519	10.5795		Ce000021Fg33	E3 ubiquitin-protein ligase RNF14 [Carex littledalei]	15.8498	17.639	13.1465	5.76476	7.15896	11.681		Ce000043Fg79	mitochondrial import receptor subunit TOM7-1-like protein [Carex littledalei]	3.63361	1.90883	1.48697	10.3113	7.04065	7.10252		Ce000026Fg175	pre-mRNA-splicing factor syf2 [Carex littledalei]	14.4264	13.169	18.0898	38.8611	41.4784	49.1145
Ce000012Fg220	Cysteine proteinase 15A [Carex littledalei]	169.808	49.0669	42.9254	61.7577	19.7473	10.105		Ce000021Fg37	oligopeptide transporter 4-like protein [Carex littledalei]	21.9376	30.3143	17.486	6.51331	3.11734	0.376008		Ce000043Fg80	GTP-binding protein [Carex littledalei]	3.69694	4.72874	6.81462	7.72349	6.58316	3.30541		Ce000026Fg184	WAT1-related protein [Carex littledalei]	45.2201	21.5703	8.5939	22.2483	30.8198	38.6264
Ce000012Fg221	putative calcium-dependent protein kinase [Carex littledalei]	13.5748	9.05115	7.59244	5.61238	6.57759	5.23563		Ce000021Fg55	ADP-ribosylation factor 1-like 2 [Asparagus officinalis]	24.6085	24.0481	37.9104	20.6939	17.187	7.6777		Ce000044Fg100	protein DA1-related 1-like protein [Carex littledalei]	48.9776	40.6987	83.2811	137.531	111.89	31.0216		Ce000026Fg186	F-box protein SKIP31 isoform X3 [Carex littledalei]	52.3702	28.2501	31.2337	70.8316	69.9145	168.531
Ce000012Fg239	serine carboxypeptidase 1-like protein [Carex littledalei]	21.695	12.3105	8.52553	6.43396	6.4706	1.64606		Ce000021Fg72	myb family transcription factor APL [Carex littledalei]	4.64914	9.51183	6.8763	1.58901	1.03897	0.049175		Ce000044Fg119	hypothetical protein FCM35_KLT11444 [Carex littledalei]	3.35873	2.04117	1.73122	6.90558	10.2886	5.87661		Ce000026Fg197	Bromodomain and PHD finger-containing protein 3 [Carex littledalei]	21.613	10.171	9.67466	19.8576	13.2316	29.4785
Ce000012Fg27	glutamine-dependent NAD(+) synthetase [Carex littledalei]	23.8029	16.0977	22.1727	12.2602	11.6742	7.10906		Ce000021Fg92	hypothetical protein TEA_005487 [Camellia sinensis var. sinensis]	9.17806	44.9204	25.1055	20.2288	17.6174	14.3158		Ce000044Fg140	Two-component response regulator ARR2 [Carex littledalei]	8.7017	6.4195	17.0512	47.2889	48.5886	16.5892		Ce000026Fg65	hypothetical protein FCM35_KLT10915 [Carex littledalei]	1.73441	1.91884	2.91075	5.29607	4.86761	10.041
Ce000012Fg29	Sucrose nonfermenting 4-like protein [Carex littledalei]	45.033	34.2425	29.7509	28.3991	24.0283	13.7313		Ce000022Fg104	TPR repeat [Carex littledalei]	29.9418	146.212	162.828	22.4155	13.9192	2.47305		Ce000044Fg147	putative N-acetyltransferase HLS1 [Carex littledalei]	2.23539	2.21283	5.59703	38.2289	32.1415	21.8829		Ce000027Fg101	cell division control protein 48 C-like protein [Carex littledalei]	1.62368	0.563228	0.957115	3.3084	5.00363	5.23946
Ce000012Fg33	acyl-CoA-binding domain-containing protein 4-like isoform X1 [Gossypium australe]	31.2976	31.9103	24.1974	14.2432	11.3485	10.2464		Ce000022Fg110	hypothetical protein OsI_09947 [Oryza sativa Indica Group]	32.9708	55.8748	25.274	11.5413	10.0882	3.48686		Ce000044Fg150	Periodic tryptophan protein 1 [Carex littledalei]	3.87615	2.34212	3.67952	8.56007	6.94583	5.12152		Ce000027Fg132	11-beta-hydroxysteroid dehydrogenase 1B-like isoform X3 [Carex littledalei]	0.149269	1.0339	1.18063	5.96414	9.53798	16.8469
Ce000012Fg34	electron transfer flavoprotein subunit alpha [Carex littledalei]	21.1691	16.2852	15.8673	7.98087	6.01631	4.40306		Ce000022Fg155	Vesicle coat complex COPI, zeta subunit [Handroanthus impetiginosus]	75.7648	81.8898	67.6521	28.9395	23.8913	16.5576		Ce000044Fg48	cyclin-T1-3 [Carex littledalei]	26.5421	20.3394	27.3476	54.7604	49.1539	47.2552		Ce000027Fg148	RNA pseudouridine synthase 7 [Carex littledalei]	7.09486	6.43721	7.28517	23.0763	23.2835	57.4582
Ce000012Fg46	Sn1-specific diacylglycerol lipase alpha [Carex littledalei]	20.471	8.80916	5.13774	6.75175	5.76215	13.1629		Ce000022Fg168	putative methyltransferase PMT3 [Carex littledalei]	42.715	57.0898	41.5197	22.9453	17.4557	4.80374		Ce000044Fg84	hypothetical protein B296_00015891 [Ensete ventricosum]	70.2696	50.5837	111.745	154.866	152.343	147.101		Ce000027Fg25	ribosome biogenesis GTPase RsgA [Carex littledalei]	10.9162	16.8022	26.0017	38.5235	43.7774	46.0079
Ce000012Fg60	calreticulin-like protein [Carex littledalei]	192.122	170.435	127.598	67.533	56.32	32.5763		Ce000022Fg170	protein G1-like4 [Carex littledalei]	44.0586	107.395	131.07	86.7896	85.3281	20.7105		Ce000044Fg97	hypothetical protein FCM35_KLT11424 [Carex littledalei]	4.92977	12.3607	15.2752	19.4103	15.032	7.19114		Ce000027Fg6	hypothetical protein FCM35_KLT12391 [Carex littledalei]	0.415502	0.170111	1.25962	4.82368	10.3307	22.0043
Ce000012Fg84	hypothetical protein Ahy_A09g044307 isoform A [Arachis hypogaea]	172.313	197.847	111.543	17.8393	13.6843	9.46288		Ce000022Fg192	homeobox-leucine zipper protein HOX10 [Carex littledalei]	126.664	124.96	139.834	111.227	56.952	45.3728		Ce000044Fg98	hypothetical protein FCM35_KLT11425 [Carex littledalei]	5.94283	3.79875	5.69858	14.5347	15.9559	14.3659		Ce000027Fg69	Phospholipase A(1) LCAT3 [Carex littledalei]	4.6968	6.29382	3.63195	3.28367	4.30335	15.2609
Ce000012Fg94	putative Syntaxin [Carex littledalei]	12.9831	4.97262	5.51547	5.9126	6.09396	5.22199		Ce000022Fg2	monocopper oxidase-like protein SKU5 [Carex littledalei]	42.4349	107.257	106.229	14.1272	5.64778	1.04213		Ce000045Fg102	unnamed protein product [Ananas comosus var. bracteatus]	16.3412	19.42	17.7349	26.9005	33.3772	18.0113		Ce000027Fg70	phosphoenolpyruvate carboxylase family protein [Artemisia annua]	6.04657	7.02624	8.74633	13.2773	18.1921	26.8087
Ce000012Fg98	Transcriptional activator DEMETER [Carex littledalei]	66.3173	60.7937	39.6762	36.0565	18.2757	17.8638		Ce000022Fg5	E3 ubiquitin-protein ligase ATL6-like protein [Carex littledalei]	12.8616	9.80568	36.77	17.4398	14.806	10.7603		Ce000045Fg133	Heparanase-like protein 1 [Carex littledalei]	81.73	72.1649	69.9906	114.546	71.1156	32.6623		Ce000028Fg106	S-adenosylmethionine decarboxylase proenzyme [Elaeis guineensis]	305.183	129.938	136.981	171.206	202.976	250.338
Ce000013Fg117	CTP synthase isoform X1 [Carex littledalei]	17.1086	17.4755	13.0922	11.4502	7.87692	7.83719		Ce000022Fg53	Calmodulin-binding protein 60 B like [Actinidia chinensis var. chinensis]	33.7805	39.5874	41.4882	28.4686	21.5679	14.5137		Ce000045Fg155	hypothetical protein FCM35_KLT01599 [Carex littledalei]	90.2921	113.912	143.033	220.3	239.752	190.635		Ce000028Fg123	protein HEADING DATE REPRESSOR 1 [Arachis duranensis]	10.3827	19.9162	17.7462	13.6234	31.0912	34.2603
Ce000013Fg124	putative cytochrome c oxidase subunit 5C-1 [Carex littledalei]	55.4628	34.526	30.6624	16.5275	14.5118	7.5498		Ce000022Fg80	putative pectate lyase 5 [Carex littledalei]	4.59584	10.9818	5.67683	0.925168	0.062077	0		Ce000045Fg161	E3 ubiquitin-protein ligase RLIM [Carex littledalei]	5.98285	12.5952	19.9463	15.381	15.6326	9.81754		Ce000028Fg144	ubiquitin carboxyl-terminal hydrolase 23 [Elaeis guineensis]	41.3395	30.6183	27.1745	47.5718	39.6885	89.8306
Ce000013Fg145	protein NRT1/ PTR FAMILY 5.10-like protein [Carex littledalei]	26.4176	9.43795	4.63457	4.74034	4.83995	4.90255		Ce000022Fg86	chaperonin CPN60-2 [Carex littledalei]	59.5787	53.9907	118.249	41.4263	35.8175	21.742		Ce000045Fg36	putative protein phosphatase 2C 68 [Carex littledalei]	50.5266	63.0831	68.9708	117.555	135.079	81.7463		Ce000028Fg165	riboflavin biosynthesis protein PYRD [Carex littledalei]	7.82497	9.88074	10.833	13.5224	19.4664	24.3591
Ce000013Fg41	pantothenate kinase 2-like isoform X1 [Carex littledalei]	25.7108	18.4965	15.5206	13.8983	10.88	9.14654		Ce000023Fg106	phosphoethanolamine N-methyltransferase 1-like protein [Carex littledalei]	14.9358	30.3771	14.4936	7.20323	3.13228	2.42352		Ce000045Fg85	hypothetical protein BHM03_00016436 [Ensete ventricosum]	4.32107	18.0594	12.9805	14.8007	10.8558	15.3962		Ce000028Fg35	17.4 kDa class III heat shock protein [Elaeis guineensis]	15.1984	23.5143	48.9803	11.3796	44.5154	123.757
Ce000013Fg47	adenosine kinase [Carex littledalei]	30.7408	13.8268	6.13567	2.54809	3.13915	2.6828		Ce000023Fg108	Core-2/I-Branching enzyme [Carex littledalei]	12.8632	17.1978	22.3514	9.75732	9.75544	6.09532		Ce000046Fg102	hypothetical protein FCM35_KLT22313 [Carex littledalei]	5.65221	7.91287	22.9093	137.856	141.595	132.988		Ce000028Fg50	Protein kinase superfamily protein with octicosapeptide/Phox/Bem1p domain [Zea mays]	17.1214	12.9371	16.7619	31.7986	37.9021	71.367
Ce000013Fg53	omega-hydroxypalmitate O-feruloyl transferase-like protein [Carex littledalei]	14.1915	4.33681	10.4434	6.93504	4.05386	0.876097		Ce000023Fg157	phosphoserine aminotransferase 2 [Carex littledalei]	33.5847	143.293	242.106	76.3665	57.0508	13.598		Ce000046Fg89	hypothetical protein FCM35_KLT00963 [Carex littledalei]	6.22732	7.64885	10.7661	26.6564	34.7952	5.26023		Ce000028Fg70	acetyltransferase [Carex littledalei]	0.236433	0.345624	1.07909	4.57755	19.8022	44.3978
Ce000013Fg76	60S ribosomal protein L36-3-like protein [Carex littledalei]	237.698	147.585	139.146	148.613	106.382	106.076		Ce000023Fg161	DEAD-box ATP-dependent RNA helicase 38-like isoform X1 [Carex littledalei]	4.11988	26.0205	32.2685	0.348762	0.827443	0.0956387		Ce000048Fg76	monothiol glutaredoxin-S12 [Carex littledalei]	4.68156	5.73572	8.31036	11.6629	9.92004	6.94447		Ce000028Fg93	hypothetical protein FCM35_KLT10601 [Carex littledalei]	37.5355	10.5205	20.2681	14.8561	15.0902	50.3668
Ce000013Fg78	vesicle transport protein SFT2A isoform X2 [Gossypium australe]	13.2475	6.89883	5.36464	4.83765	5.33388	3.88614		Ce000023Fg30	phosphatidylinositol/phosphatidylcholine transfer protein SFH8-like isoform X1 [Carex littledalei]	170.504	208.39	162.822	96.1046	65.3567	49.2541		Ce000048Fg77	monothiol glutaredoxin-S12 [Carex littledalei]	9.46552	8.28011	10.9906	18.7265	19.4329	8.54762		Ce000028Fg97	50S ribosomal protein L13 [Carex littledalei]	13.4861	13.7911	12.9055	26.9261	24.9423	34.0055
Ce000013Fg82	E3 ubiquitin-protein ligase UBR7 [Carex littledalei]	21.3901	11.1047	10.2149	10.3084	11.0928	5.20396		Ce000023Fg48		206.933	275.642	201.504	145.633	155.522	68.2168		Ce000048Fg86	Chaperone protein ClpB1 [Carex littledalei]	8.71272	10.3859	13.2464	17.8217	20.5303	10.0161		Ce000029Fg1	F-box/LRR-repeat protein 14 [Phoenix dactylifera]	3.38128	2.59178	3.48645	5.9828	5.14145	7.05995
Ce000014Fg107	putative methionine--tRNA ligase [Carex littledalei]	33.0442	30.162	28.6937	15.1454	11.3377	6.7461		Ce000023Fg60	soluble starch synthase 1 [Carex littledalei]	7.4574	42.8404	59.7389	14.7775	9.82567	6.62545		Ce000049Fg50	hypothetical protein FCM35_KLT09752 [Carex littledalei]	4.90498	11.7944	12.5958	14.7188	10.3605	13.0086		Ce000029Fg111	predicted protein [Hordeum vulgare subsp. vulgare]	7.19824	6.30037	6.42232	9.68642	9.52255	15.3407
Ce000014Fg112		23.176	17.1071	13.3134	5.99329	6.49596	6.66913		Ce000023Fg98	AP2/ERF and B3 domain-containing transcription repressor RAV2-like protein [Carex littledalei]	18.8482	37.207	72.1676	17.281	3.2686	0.296288		Ce000050Fg11		28.307	10.452	44.8124	33.1395	33.057	24.6421		Ce000029Fg122	ferredoxin sulfite reductase [Allium cepa]	30.2681	29.9767	40.1658	51.5268	67.7923	68.3852
Ce000014Fg119	putative protein disulfide-isomerase A6 [Carex littledalei]	206.697	197.632	145.125	86.6066	79.7987	46.1891		Ce000024Fg110	hypothetical protein FCM35_KLT19451 [Carex littledalei]	8.08784	22.1628	23.4287	10.2157	6.7733	1.67762		Ce000050Fg117	fructose-bisphosphate aldolase-lysine N-methyltransferase [Carex littledalei]	0.711533	0.676843	1.20859	9.21928	5.61282	5.36328		Ce000029Fg135	hypothetical protein CCACVL1_29662 [Corchorus capsularis]	82.8554	70.5361	75.1121	293.037	376.079	578.502
Ce000014Fg122	E3 ubiquitin-protein ligase RBBP6 [Carex littledalei]	54.3801	47.6453	43.8737	32.4185	20.8525	34.9897		Ce000024Fg118	putative NAD kinase 1-like protein [Carex littledalei]	24.7747	137.881	141.424	13.9377	12.3068	7.61248		Ce000050Fg122	hypothetical protein FCM35_KLT11673 [Carex littledalei]	7.35224	16.9521	17.0203	18.0045	14.5037	11.7087		Ce000029Fg138	hypothetical protein GW17_00018738 [Ensete ventricosum]	13.5188	11.0505	11.119	17.1569	19.9805	50.942
Ce000014Fg131	hypothetical protein C4D60_Mb05t00080 [Musa balbisiana]	73.8554	57.1884	29.8944	20.5598	17.8093	9.52145		Ce000024Fg143	E3 ubiquitin-protein ligase KEG-like protein [Carex littledalei]	22.1698	26.8939	27.7777	11.2669	7.21758	5.74493		Ce000050Fg5	DNA polymerase I A [Carex littledalei]	23.2462	16.6153	32.5684	55.9916	49.4448	31.351		Ce000029Fg150	hypothetical protein FCM35_KLT15277 [Carex littledalei]	1.96164	0.425141	1.89789	7.33099	5.71978	10.6812
Ce000014Fg140	thaumatin-like protein 1 [Carex littledalei]	77.0822	47.7443	46.136	50.9166	38.0577	33.102		Ce000024Fg157	peroxisomal adenine nucleotide carrier 1-like protein [Carex littledalei]	85.1356	268.622	217.385	36.3518	31.406	21.3171		Ce000050Fg82	Alpha/beta hydrolase family [Carex littledalei]	4.50047	4.75783	6.5238	8.37832	9.15097	4.75408		Ce000029Fg163	photosystem II reaction center W protein [Carex littledalei]	0.431604	0.312563	1.18923	5.16582	4.67392	20.0075
Ce000014Fg15	NAC domain-containing protein 18-like protein [Carex littledalei]	48.2429	18.7157	10.6681	17.987	25.2762	18.0972		Ce000024Fg2	hypothetical protein FCM35_KLT18837 [Carex littledalei]	4.16584	8.53561	7.54213	7.27254	5.95383	7.08286		Ce000050Fg96	malate dehydrogenase [Carex littledalei]	43.4366	33.2218	59.1722	223.855	308.925	177.318		Ce000029Fg181	vicilin-like antimicrobial peptides 2-2 [Carex littledalei]	0.794543	1.06002	1.60883	146.97	92.3269	5603.96
Ce000014Fg153	exocyst complex component SEC15B-like protein [Carex littledalei]	42.2408	32.7563	24.3178	13.6807	11.1623	9.51633		Ce000024Fg33	hypothetical protein FCM35_KLT19336 [Carex littledalei]	31.6464	42.3314	61.7452	35.4135	25.2137	13.4087		Ce000051Fg112		4.50522	4.12133	4.41382	8.21795	9.72081	7.04031		Ce000029Fg199	hypothetical protein FCM35_KLT07663 [Carex littledalei]	4.78779	6.59832	10.9417	5.91628	7.52253	10.8026
Ce000014Fg170	kinesin-13A [Carex littledalei]	37.9145	26.2605	15.3083	7.0226	5.7571	2.46182		Ce000024Fg35	hypothetical protein FCM35_KLT19340 [Carex littledalei]	14.2359	15.2892	14.627	11.4005	10.4147	5.99348		Ce000051Fg130	hypothetical protein FCM35_KLT20398 [Carex littledalei]	1.28301	1.30532	7.51448	67.7947	78.591	58.1563		Ce000029Fg26	vacuolar protein sorting-associated protein 28 homolog 1-like [Ananas comosus]	5.95853	2.10694	2.59465	6.43198	9.14206	18.0377
Ce000014Fg173	ABC transporter C family member 14-like protein [Carex littledalei]	44.6804	22.8938	19.0783	13.3724	17.2127	26.8445		Ce000024Fg51	putative calcium-binding protein CML18 [Carex littledalei]	91.5403	113.149	116.102	33.8231	26.971	17.2787		Ce000051Fg131		2.53148	2.92258	5.01182	6.86039	5.77824	3.9972		Ce000029Fg39	hypothetical protein EJB05_42008 [Eragrostis curvula]	14.0666	6.80674	8.44866	7.83436	9.94337	15.9071
Ce000014Fg181	protein RALF-like 1 [Carex littledalei]	43.7839	16.6138	16.791	18.5819	25.7521	10.2061		Ce000024Fg53	LIM domain-containing protein WLIM2b-like protein [Carex littledalei]	22.9113	28.3192	22.312	12.0904	9.63033	6.3749		Ce000051Fg132	Superoxide dismutase [Fe] 2 [Carex littledalei]	6.74339	7.69633	11.7537	17.5177	17.3983	6.53935		Ce000029Fg40	uncharacterized protein LOC100278233 [Zea mays]	10.2491	11.3945	12.9465	20.3453	38.4415	117.358
Ce000014Fg184	bifunctional protein FolD 2 [Carex littledalei]	67.124	67.3961	45.8383	28.8479	22.3013	11.3438		Ce000024Fg55	conserved oligomeric Golgi complex subunit 5-like isoform X1 [Carex littledalei]	20.6733	22.0634	17.8167	9.00923	6.72957	4.85889		Ce000051Fg48	ABC transporter C family member 5 [Carex littledalei]	45.1664	38.0919	33.0462	106.879	103.6	39.8965		Ce000029Fg82	transcription factor bHLH123 [Elaeis guineensis]	1.26398	0.183408	0.232116	2.7605	6.88715	7.23867
Ce000014Fg32	SUMO-activating enzyme subunit 1B-1-like protein [Carex littledalei]	20.3446	10.9443	8.89953	10.7116	12.1306	8.26328		Ce000024Fg59	pyrroline-5-carboxylate reductase [Carex littledalei]	134.493	326.285	328.821	23.8085	18.9159	4.27657		Ce000051Fg59	7-hydroxymethyl chlorophyll a reductase [Carex littledalei]	2.05635	2.21051	2.91422	12.8627	10.7712	10.281		Ce000029Fg96	diacylglycerol kinase 5-like [Dendrobium catenatum]	10.8151	4.65169	10.5583	16.6129	17.4583	25.2144
Ce000014Fg37	aquaporin protein AQU20 [Carex littledalei]	23.3486	19.5075	12.6197	5.94792	5.75437	7.69118		Ce000024Fg99	putative DNA-binding protein ESCAROLA [Carex littledalei]	2.76372	3.87035	10.7494	2.51413	1.48709	0.41105		Ce000051Fg88	basic blue protein-like protein [Carex littledalei]	4.13805	0	0.374927	9.65009	2.4406	0.0507233		Ce000030Fg106	hypothetical protein FCM35_KLT16374 [Carex littledalei]	14.5938	7.15807	6.55619	15.265	15.609	24.223
Ce000014Fg57	cation/H(+) antiporter 19-like protein [Carex littledalei]	20.0828	9.16751	6.64532	2.07045	1.90752	1.09022		Ce000025Fg110	serine hydroxymethyltransferase [Carex littledalei]	67.1052	68.7031	62.3754	30.2776	22.9051	8.86442		Ce000051Fg96	uncharacterized protein LOC105044863 isoform X2 [Elaeis guineensis]	14.0843	11.8729	17.8621	27.487	31.4908	13.0931		Ce000030Fg41	beta-glucosidase 22-like protein [Carex littledalei]	8.41312	7.01449	9.95544	15.2073	14.757	41.4768
Ce000014Fg59	microtubule-associated protein 70-1 [Elaeis guineensis]	26.4785	22.9464	23.798	12.6908	10.2329	3.29463		Ce000025Fg144	serine acetyltransferase 1, chloroplastic-like [Phoenix dactylifera]	13.2124	78.8096	61.7846	5.89022	6.69089	1.15543		Ce000052Fg125	hypothetical protein TEA_022950 [Camellia sinensis var. sinensis]	2.52701	2.89571	4.67225	12.1879	12.6085	7.53948		Ce000030Fg85	thiamine thiazole synthase 1 [Carex littledalei]	18.0977	7.47716	24.0403	918.859	1219.42	1219.2
Ce000014Fg74	receptor-like protein kinase THESEUS 1 [Carex littledalei]	54.5929	57.4222	37.608	22.0737	19.4254	51.639		Ce000025Fg154	Casein Kinase 2 substrate [Carex littledalei]	5.92525	13.5517	7.41759	1.53629	0.893149	0.117401		Ce000052Fg136	ribulose bisphosphate carboxylase small chain, chloroplastic-like [Phoenix dactylifera]	0.768476	57.5167	124.005	218.224	371.655	57.067		Ce000031Fg13	Xyloglucan endotransglucosylase/hydrolase 1 [Hibiscus syriacus]	3.59344	2.1787	3.28002	4.82005	5.11144	7.64535
Ce000014Fg78	dihydrolipoyl dehydrogenase [Carex littledalei]	65.239	38.899	35.9826	28.4035	32.6703	19.806		Ce000025Fg166	Histone deacetylase complex subunit SAP30L [Carex littledalei]	5.13981	25.3922	10.9867	0.544815	0.0870477	0		Ce000052Fg46	ribonuclease Z [Carex littledalei]	4.08958	8.01221	8.81097	8.97743	7.52467	4.53764		Ce000031Fg149	Eukaryotic translation initiation factor 5A isoform B [Glycine soja]	148.058	97.3227	112.34	240.654	289.925	604.843
Ce000014Fg93	protein MODIFIER OF SNC1 1 [Carex littledalei]	23.3328	15.2536	17.5326	11.4031	9.91237	8.20918		Ce000025Fg43	putative AP2-related transcription factor [Carex littledalei]	57.0742	125.492	75.573	11.1304	7.15438	10.1533		Ce000052Fg51	unnamed protein product [Digitaria exilis]	4.18799	3.37699	7.1516	10.0725	5.81504	1.92919		Ce000031Fg150	putative mitochondrial saccharopine dehydrogenase-like oxidoreductase [Carex littledalei]	11.9015	7.78331	15.8614	61.3818	91.7203	111.834
Ce000014Fg94	ATP-citrate synthase alpha chain protein 2 [Carex littledalei]	60.2328	16.898	11.4524	0.582332	0.344769	0.0379333		Ce000025Fg51	protein REVEILLE 6-like protein [Carex littledalei]	48.4719	52.9694	62.3709	49.7154	26.4209	13.4119		Ce000053Fg43	beta carbonic anhydrase 5 [Carex littledalei]	37.4209	27.2908	42.352	85.8844	109.406	83.3768		Ce000031Fg157	nuclear transcription factor Y subunit A-7-like isoform X1 [Carex littledalei]	40.4101	56.0867	70.2621	70.3666	70.8917	92.9594
Ce000014Fg96	hypothetical protein Zm00014a_018816 [Zea mays]	12.6374	8.53322	6.95334	6.18088	4.9607	4.38245		Ce000025Fg57	peptide methionine sulfoxide reductase A4 [Carex littledalei]	30.7743	45.0646	63.128	41.0165	37.9781	20.2513		Ce000053Fg54	protein MIZU-KUSSEI 1 [Carex littledalei]	3.53261	0.405274	1.59032	6.11518	10.5468	6.95267		Ce000031Fg27	hypothetical protein FCM35_KLT17610 [Carex littledalei]	1.65922	4.5773	10.9399	4.87362	9.69422	11.0429
Ce000015Fg19	Alanine aminotransferase 2 [Zostera marina]	23.906	20.1037	10.8717	22.5488	16.2846	11.0629		Ce000025Fg74	hypothetical protein TEA_012351 [Camellia sinensis var. sinensis]	58.3428	78.0628	78.1047	37.7475	21.6436	12.8963		Ce000054Fg141	putative F-box/LRR-repeat protein 23 [Carex littledalei]	1.98203	2.674	4.86354	11.6055	12.6046	10.211		Ce000031Fg53	4-coumarate--CoA ligase-like 1 [Carex littledalei]	0.073024	3.70484	9.4557	13.6697	7.07802	16.2813
Ce000015Fg20		29.4065	17.0072	15.8509	26.5734	20.196	13.8289		Ce000025Fg76	metacaspase-1-like isoform X1 [Carex littledalei]	115.802	93.5683	132.02	38.8394	28.2861	7.33473		Ce000054Fg2	cell division protein FtsZ 2-1 [Carex littledalei]	14.0526	48.5687	69.3581	98.1487	92.6973	40.4577		Ce000031Fg62	splicing factor 3B subunit 3-like protein [Carex littledalei]	23.8547	11.0949	10.5357	19.0032	20.456	52.0787
Ce000015Fg42	premnaspirodiene oxygenase-like protein [Carex littledalei]	16.5784	11.2697	9.72438	8.33084	7.60763	4.32229		Ce000025Fg88	chaperonin [Carex littledalei]	10.9788	19.6161	26.0527	17.1154	15.8295	11.0263		Ce000054Fg3	Agmatine deiminase [Carex littledalei]	5.18868	45.6487	34.478	49.1347	48.2102	19.1961		Ce000031Fg96	PLATZ transcription factor [Carex littledalei]	2.58163	0.201419	1.74282	6.64391	14.2267	26.793
Ce000015Fg70	diacylglycerol O-acyltransferase 2-like protein [Carex littledalei]	18.1132	11.1355	9.54077	5.03727	6.47116	2.97846		Ce000026Fg105	Rhomboid-like protein 14 [Carex littledalei]	7.28077	22.0405	26.0055	2.45776	3.47952	3.60376		Ce000054Fg87	hypothetical protein FCM35_KLT05611 [Carex littledalei]	9.55998	21.0966	19.9742	28.4486	27.294	17.8		Ce000032Fg113	hypothetical protein B296_00045504, partial [Ensete ventricosum]	22.9807	13.7132	10.7316	38.7643	54.687	100.51
Ce000015Fg80	hypothetical protein C4D60_Mb11t10570 [Musa balbisiana]	15.9438	12.8934	11.7093	6.42651	3.18452	3.59164		Ce000026Fg109	transcription factor PIF3-like isoform X2 [Carex littledalei]	23.3891	61.1415	46.0381	27.8385	21.192	10.309		Ce000055Fg118	P-loop NTPase domain-containing protein LPA1 [Carex littledalei]	8.64848	9.07132	14.2072	25.9415	15.3091	6.62779		Ce000032Fg120	beta-expansin 1 [Carex littledalei]	2.42906	2.09619	2.4968	5.6942	7.81564	7.11564
Ce000015Fg83	mechanosensitive ion channel protein 3 [Carex littledalei]	52.6861	49.3949	43.6279	27.6561	27.2262	22.378		Ce000026Fg11	peroxisomal acyl-coenzyme A oxidase 1-like isoform X1 [Carex littledalei]	246.102	549.011	406.425	37.5223	17.4673	7.18227		Ce000055Fg119	P-loop NTPase domain-containing protein LPA1 [Carex littledalei]	0.485663	1.57324	4.14032	67.5841	172.7	106.375		Ce000032Fg145	COP9 signalosome complex subunit 7 isoform X2 [Carex littledalei]	54.8	65.2593	81.1076	143.578	129.423	230.379
Ce000015Fg84	UDP-D-xylose:L-fucose alpha-1,3-D-xylosyltransferase 1-like protein [Carex littledalei]	13.888	11.3792	5.72369	4.66516	3.75698	2.14849		Ce000026Fg111	L-lactate dehydrogenase A-like protein [Carex littledalei]	231.262	325.263	255.433	32.5863	12.5031	1.78015		Ce000055Fg120	pumilio 3-like protein [Carex littledalei]	24.4134	29.6438	50.5001	52.3569	49.395	38.2284		Ce000032Fg167	exosome complex exonuclease RRP46 [Carex littledalei]	11.2795	6.90803	8.78928	38.8449	33.4036	37.6312
Ce000016Fg101	protein ELC-like protein [Carex littledalei]	24.6854	19.5985	17.9767	8.74542	9.45804	5.53424		Ce000026Fg122	ent-kaurenoic acid oxidase 1-like protein [Carex littledalei]	1.95917	6.68146	10.0345	5.02851	2.83748	4.91678		Ce000055Fg127	protein N-lysine methyltransferase METTL21A [Carex littledalei]	4.22076	3.6023	3.86546	9.05488	7.5618	7.54324		Ce000032Fg186	hypothetical protein ACMD2_15491 [Ananas comosus]	15.1437	11.831	14.4471	66.3448	88.5891	220.33
Ce000016Fg103	SEC1 family transport protein SLY1-like protein [Carex littledalei]	16.5002	13.0482	8.24432	5.33459	5.52976	5.07529		Ce000026Fg123	PREDICTED: ent-kaurenoic acid oxidase 1-like [Musa acuminata subsp. malaccensis]	0.822604	6.02055	8.94717	4.91107	2.94038	6.68459		Ce000055Fg132	hypothetical protein FCM35_KLT22033 [Carex littledalei]	1.86683	2.12334	3.08308	6.09922	7.09643	5.71599		Ce000032Fg190	pentatricopeptide repeat-containing protein [Carex littledalei]	1.56684	0.875579	1.91186	11.9274	9.82809	12.473
Ce000016Fg124	alpha-1,3-mannosyl-glycoprotein 2-beta-N-acetylglucosaminyltransferase isoform X2 [Carex littledalei]	23.7437	22.7066	12.9238	9.98899	10.7262	7.66114		Ce000026Fg133	5'-methylthioadenosine/S-adenosylhomocysteine nucleosidase 2-like protein [Carex littledalei]	23.7017	35.9193	31.8587	12.6027	12.1962	6.4774		Ce000055Fg137	putative aux/IAA protein [Carex littledalei]	14.8545	10.3058	11.2018	25.1228	42.9086	13.8191		Ce000032Fg4	plasma membrane associated protein [Carex littledalei]	11.2984	3.02054	12.6705	277.111	320.995	665.514
Ce000016Fg131	hypothetical protein FCM35_KLT10144 [Carex littledalei]	13.4373	8.61019	9.37812	10.9193	11.3301	6.71168		Ce000026Fg167	threonine--tRNA ligase [Carex littledalei]	33.4429	31.0575	33.9435	24.8518	16.3339	11.1997		Ce000055Fg30	uncharacterized protein LOC109727222 [Ananas comosus]	1.32913	10.7725	29.6853	171.438	192.73	133.595		Ce000032Fg48	tetratricopeptide repeat protein 27 homolog isoform X1 [Phoenix dactylifera]	11.3439	6.9672	8.34475	17.3449	15.6775	22.6504
Ce000016Fg145	palmitoyltransferase ZDHHC17-like isoform X3 [Carex littledalei]	11.5006	8.16861	6.09939	6.86253	5.60067	4.20099		Ce000026Fg19	Elongation factor 1-delta [Glycine soja]	119.916	112.101	121.766	127.751	75.0494	57.6871		Ce000055Fg54	DEAD-box ATP-dependent RNA helicase 48-like [Ananas comosus]	1.89279	0.965489	1.76372	6.21761	4.72541	2.70824		Ce000032Fg49	hypothetical protein FCM35_KLT20143 [Carex littledalei]	0.858245	0	0.269673	4.27177	9.30825	31.8248
Ce000016Fg146	putative clathrin assembly protein [Carex littledalei]	54.9502	29.2643	40.5422	24.5762	20.324	8.89333		Ce000026Fg210	MATE efflux family protein 3 [Carex littledalei]	31.7263	88.2853	144.058	45.254	34.4376	17.1803		Ce000056Fg110	D-amino-acid transaminase, chloroplastic-like [Ananas comosus]	24.1674	24.3159	27.9779	62.4328	63.4904	18.984		Ce000032Fg5	plasma membrane associated protein [Carex littledalei]	40.9666	11.3571	41.2995	867.934	1082.43	2106.57
Ce000016Fg148	protein spotted leaf 11-like protein [Carex littledalei]	53.2632	47.919	37.2882	17.3954	13.4537	8.95283		Ce000026Fg215	WD repeat-containing protein DWA2 isoform X1 [Carex littledalei]	68.2075	72.0197	66.1605	52.1074	49.3697	31.1108		Ce000057Fg11	hypothetical protein FCM35_KLT10001 [Carex littledalei]	1.83126	2.98178	7.37766	13.2123	15.6437	11.8542		Ce000032Fg54	hypothetical protein FCM35_KLT20109 [Carex littledalei]	17.7341	19.2405	18.1834	50.5948	63.5028	111.202
Ce000016Fg150	Heat shock cognate 70 kDa protein [Ananas comosus]	569.906	407.036	431.345	195.772	196.831	68.2267		Ce000026Fg39	peptide methionine sulfoxide reductase A5 [Elaeis guineensis]	33.6623	35.3446	38.9444	19.2919	12.7107	7.00468		Ce000057Fg31	ABC1 family [Carex littledalei]	3.36983	3.18302	4.70096	8.94466	6.49266	5.40186		Ce000032Fg79	elongator complex protein 6 [Carex littledalei]	14.2469	9.72676	10.5165	18.2676	18.5055	30.7698
Ce000016Fg153		24.8769	17.2568	13.6758	11.2366	10.0214	7.70711		Ce000026Fg92	beta-fructofuranosidase 1-like protein [Carex littledalei]	89.7373	200.858	67.5606	1.34442	0.607842	0.0257943		Ce000057Fg79	small RNA 2'-O-methyltransferase-like isoform X1 [Carex littledalei]	9.18211	10.4223	19.3504	14.8444	14.6201	6.3004		Ce000032Fg8	photosystem I reaction center subunit IV A [Carex littledalei]	2.31777	1.69469	2.79035	10.6794	9.68283	18.4998
Ce000016Fg154	hypothetical protein FCM35_KLT03048 [Carex littledalei]	50.2733	35.0165	27.1025	17.9637	19.4056	21.1177		Ce000027Fg149	serine/threonine-protein kinase PBS1-like protein [Carex littledalei]	56.8898	91.5391	96.6697	39.9951	29.8021	14.5243		Ce000058Fg124	nitric oxide-associated protein [Carex littledalei]	5.21574	7.79299	8.69608	10.4145	6.07575	6.15904		Ce000032Fg86	protein SET DOMAIN GROUP 40 isoform X2 [Carex littledalei]	12.3219	8.56075	10.1284	32.7447	34.7501	51.3922
Ce000016Fg166	RNA and export factor-binding protein 2 [Carex littledalei]	216.282	144.755	133.482	72.8773	70.3031	62.9256		Ce000027Fg21	SNF1-related protein kinase regulatory subunit gamma-1 [Carex littledalei]	84.7098	223.462	271.631	91.0043	60.009	31.8591		Ce000058Fg127	protein REVEILLE 5-like isoform X2 [Carex littledalei]	10.588	9.43957	19.221	32.0066	29.7296	27.8034		Ce000032Fg98	cysteine proteinase 15A [Carex littledalei]	6.68656	1.75612	2.92979	3.26413	4.57504	59.9438
Ce000016Fg174	histone H2A [Carex littledalei]	134.246	61.0687	32.5084	14.9945	14.5949	12.0412		Ce000027Fg41	Trafficking protein particle complex II-specific subunit 130 [Carex littledalei]	21.5327	25.5415	16.6895	10.7351	8.01878	8.65721		Ce000058Fg138	WAT1-related protein [Carex littledalei]	2.19223	2.50721	4.42245	7.42488	10.9139	0.702329		Ce000033Fg12	putative E3 ubiquitin-protein ligase SINA-like 6 [Carex littledalei]	4.28496	1.85587	2.74199	3.44861	4.51555	10.7104
Ce000016Fg181	PREDICTED: histone H2B.7-like [Tarenaya hassleriana]	37.1995	15.6779	18.847	17.619	20.4385	20.0627		Ce000027Fg43	serine/threonine-protein kinase sepA-like protein [Carex littledalei]	47.3873	53.1762	44.7258	27.2868	20.8143	25.5203		Ce000058Fg143	homeobox protein BEL1 [Carex littledalei]	2.96402	0.291766	3.63573	16.8046	9.73689	4.0654		Ce000033Fg13	--	3.05849	1.14902	1.71789	1.70871	1.94716	6.9122
Ce000016Fg3	hypothetical protein FCM35_KLT01849 [Carex littledalei]	19.2019	11.4457	10.0333	5.6547	5.62813	3.68924		Ce000027Fg86	PREDICTED: lipoamide acyltransferase component of branched-chain alpha-keto acid dehydrogenase complex, mitochondrial isoform X3 [Nelumbo nucifera]	26.7726	31.9341	20.3003	7.97986	7.25816	12.3742		Ce000058Fg154	uncharacterized protein A4U43_C02F19030 [Asparagus officinalis]	11.5587	6.06908	8.33388	27.3588	19.2754	22.632		Ce000033Fg39	ethylene-responsive transcription factor ERF118 [Carex littledalei]	21.0652	15.9526	14.6591	48.5508	43.3631	65.6624
Ce000016Fg33	acyl-CoA-binding domain-containing protein 3-like protein [Carex littledalei]	24.2728	20.6538	10.4063	4.69503	8.53399	10.0652		Ce000028Fg10_Ce000028Fg9	PREDICTED: serine/threonine-protein kinase At5g01020-like [Musa acuminata subsp. malaccensis]	108.757	127.925	114.137	52.552	44.0575	13.116		Ce000058Fg47	hypothetical protein FCM35_KLT10985 [Carex littledalei]	4.57823	7.92398	21.0045	26.4135	45.8412	27.8514		Ce000033Fg47	metal tolerance protein 7 isoform X2 [Setaria viridis]	9.28412	2.31068	5.13123	13.3523	20.7417	44.9277
Ce000016Fg34	Signal peptidase complex catalytic subunit SEC11C [Zea mays]	46.1654	34.1578	31.1467	13.4106	16.2676	9.54286		Ce000028Fg134	E3 ubiquitin-protein ligase RNF185-like protein [Carex littledalei]	12.1273	14.1973	10.856	8.05471	6.06375	3.99237		Ce000058Fg66	hypothetical protein FCM35_KLT10971 [Carex littledalei]	50.1932	70.7046	89.7215	196.316	202.739	77.1935		Ce000033Fg63	hypothetical protein FCM35_KLT06005 [Carex littledalei]	2.60167	1.48755	4.8901	6.18162	5.57668	9.2021
Ce000016Fg37	hippocampus abundant transcript-like protein 1 isoform X1 [Carex littledalei]	14.8386	5.0155	4.32962	11.2772	9.33799	7.32941		Ce000028Fg164	protein DEHYDRATION-INDUCED 19 6-like protein [Carex littledalei]	15.7848	30.2654	34.4658	25.0963	21.191	7.11022		Ce000058Fg69	eyes absent 4 [Carex littledalei]	29.4814	67.9106	75.6357	72.3476	60.3455	40.8173		Ce000033Fg68		4.33658	3.37119	4.18378	6.83087	6.7975	15.0881
Ce000016Fg40	rac-like GTP-binding protein 7 [Artemisia annua]	97.6449	86.6823	62.7393	41.8369	35.2525	17.8471		Ce000028Fg26	unnamed protein product [Ananas comosus var. bracteatus]	25.5963	30.4812	34.1608	32.7858	26.1912	12.7126		Ce000058Fg74	rRNA-processing protein UTP23 [Carex littledalei]	9.77246	6.86284	10.6697	24.0459	17.254	18.7233		Ce000034Fg110	small heat shock protein [Carex littledalei]	0.202129	0.18464	0.375668	1.23322	15.0232	145.641
Ce000016Fg5	lipid transfer-like protein VAS isoform X1 [Carex littledalei]	50.9092	23.7575	12.7393	32.2286	27.9537	9.27038		Ce000028Fg34	hypothetical protein E2562_029926 [Oryza meyeriana var. granulata]	142.447	276.005	500.503	208.867	197.574	201.098		Ce000058Fg8	uncharacterized protein LOC103697786 isoform X1 [Phoenix dactylifera]	1.96157	2.07127	1.7521	24.7658	32.5934	10.9261		Ce000034Fg153	ribosome biogenesis protein TSR3 isoform X1 [Carex littledalei]	6.62295	3.47735	4.85725	12.3256	14.6248	19.3217
Ce000016Fg53	anther-specific proline-rich protein APG-like protein [Carex littledalei]	32.5591	29.5344	25.5017	13.5198	12.1946	8.44347		Ce000028Fg37	AP3-complex subunit beta-A [Carex littledalei]	30.6516	67.7026	62.4164	19.6338	10.6609	3.18303		Ce000059Fg2	hypothetical protein CRG98_022790 [Punica granatum]	10.7338	15.6022	18.1856	22.0841	24.1873	9.21525		Ce000034Fg69	protein CutA 1, chloroplastic [Ananas comosus]	13.6099	19.4239	25.6723	24.5164	24.204	37.3375
Ce000016Fg73	hypothetical protein FCM35_KLT01799 [Carex littledalei]	23.6004	20.8275	19.6325	22.0523	19.8508	10.2696		Ce000028Fg38	unnamed protein product [Ananas comosus var. bracteatus]	1286.31	2219.65	1798.21	188.263	32.8225	9.68933		Ce000060Fg126	lipoyl synthase 1 [Carex littledalei]	14.9075	12.7848	26.5176	49.7089	54.592	13.1014		Ce000034Fg90	methionine aminopeptidase 2B-like isoform X1 [Rhodamnia argentea]	54.3799	48.358	57.1433	61.7871	74.0288	117.896
Ce000016Fg75	aspartic proteinase-like protein 1 [Carex littledalei]	90.1738	77.7627	53.8292	20.6956	15.9189	2.93497		Ce000028Fg39	unnamed protein product [Ananas comosus var. bracteatus]	950.815	1455.83	792.618	87.4144	26.7999	12.0145		Ce000060Fg14	Protein PLASTID TRANSCRIPTIONALLY ACTIVE 12 [Carex littledalei]	3.24289	1.88627	1.71913	5.93644	8.07342	5.08761		Ce000035Fg101	Phosphatidylethanolamine-binding protein [Carex littledalei]	0.204036	0.580742	10.0142	17.0264	54.9001	143.47
Ce000016Fg93	chitinase 1-like protein [Carex littledalei]	46.1947	21.9088	9.81213	1.30965	0.0600773	0.0178767		Ce000028Fg40	hypothetical protein E3N88_05635 [Mikania micrantha]	142.955	166.174	153.62	154.725	130.664	55.7513		Ce000060Fg147	PREDICTED: uncharacterized protein LOC109160270 isoform X1 [Ipomoea nil]	5.19258	3.46198	5.41487	8.75646	10.9509	8.4899		Ce000035Fg132	transcription factor HBP-1b(c1)-like protein [Carex littledalei]	0.31989	2.01105	0.56339	104.385	22.1402	449.041
Ce000017Fg1	protein FAM63A isoform X2 [Carex littledalei]	28.2233	23.9159	23.0195	16.9528	15.3283	12.267		Ce000028Fg48	nuclease CAN2 [Carex littledalei]	39.2505	76.6817	56.2348	64.6642	37.8343	9.99729		Ce000060Fg2	PREDICTED: uncharacterized protein LOC109160270 isoform X1 [Ipomoea nil]	3.96191	3.37853	5.31912	8.56418	10.7876	8.13506		Ce000035Fg143	calcyclin-binding protein isoform X1 [Nicotiana tomentosiformis]	9.88198	9.52797	22.4724	17.8107	28.058	28.908
Ce000017Fg103	protein ELC-like protein [Carex littledalei]	25.6655	21.3325	18.5941	8.86288	9.83092	5.63702		Ce000028Fg92	hypothetical protein ACMD2_00950 [Ananas comosus]	36.1282	85.9934	58.0567	53.4	56.5168	39.8441		Ce000060Fg27	lipoyl synthase 1 [Carex littledalei]	13.8061	13.0246	24.5091	38.1861	39.4512	11.3434		Ce000035Fg166	hypothetical protein FCM35_KLT13726 [Carex littledalei]	0.053763	4.77461	15.0563	23.7598	24.1076	33.654
Ce000017Fg105	SEC1 family transport protein SLY1-like protein [Carex littledalei]	16.9804	13.3671	8.45854	5.57544	6.03584	5.40018		Ce000029Fg105	AP2/ERF super family protein, partial [Eleocharis dulcis]	25.5454	46.7096	54.3349	23.5463	44.187	9.24263		Ce000060Fg9	Mitochondrial acidic protein MAM33 [Carex littledalei]	2.62958	1.60582	1.81628	5.65582	4.12773	2.68415		Ce000035Fg168	coiled-coil domain-containing protein 137 [Carex littledalei]	29.7661	17.9156	24.0771	126.442	136.204	312.694
Ce000017Fg121	DNA-binding protein MNB1B-like protein [Carex littledalei]	38.2932	20.1133	27.8831	18.411	31.8188	15.0682		Ce000029Fg116	glyoxysomal processing protease, glyoxysomal isoform X1 [Ananas comosus]	4.22332	10.8299	7.4305	6.25911	5.06852	2.52655		Ce000061Fg106	ketoacyl-ACP reductase 1 [Artemisia annua]	62.6606	63.5926	84.2056	169.14	142.572	42.3199		Ce000035Fg186	nucleolar protein 10 [Carex littledalei]	17.6947	6.77585	11.1799	53.5101	44.7951	135.058
Ce000017Fg126	calcium-binding protein [Carex littledalei]	25.2205	24.2044	20.938	12.7763	9.89003	8.0127		Ce000029Fg126	Phosphoglycerate kinase, chloroplastic [Ananas comosus]	17.6779	31.71	24.9976	21.724	17.1856	7.82244		Ce000061Fg119	hypothetical protein FCM35_KLT15732 [Carex littledalei]	7.95767	7.39185	11.8457	19.0234	19.1815	19.4248		Ce000035Fg44	Ribonuclease 3 [Carex littledalei]	6.15479	6.86937	7.67838	24.7054	21.9227	27.0815
Ce000017Fg127	alpha-1,3-mannosyl-glycoprotein 2-beta-N-acetylglucosaminyltransferase isoform X2 [Carex littledalei]	20.4108	19.2051	15.1228	11.1863	8.39629	5.31388		Ce000029Fg171	Dymeclin [Carex littledalei]	17.349	40.753	53.2381	9.73668	8.6471	4.60404		Ce000061Fg14	double-strand break repair protein MRE11 [Carex littledalei]	3.93057	2.68711	2.58587	9.95088	8.76666	5.85274		Ce000035Fg93	zinc finger protein VAR3 [Carex littledalei]	4.31841	3.81419	5.74991	13.175	15.8775	23.8555
Ce000017Fg129	U-box domain-containing protein 44-like protein [Carex littledalei]	24.3234	14.134	19.5877	10.6983	4.7636	1.40186		Ce000029Fg201	hypothetical protein CK203_027241 [Vitis vinifera]	2.95406	18.1208	11.9246	10.7689	7.0571	7.72281		Ce000061Fg72	U-box domain-containing protein 9 [Carex littledalei]	14.9343	16.3021	37.3173	84.0999	80.6451	48.7906		Ce000035Fg96	em-like protein GEA6 [Sesamum indicum]	0	0	0.62963	11.0062	22.7543	38.015
Ce000017Fg138	callose synthase 3-like protein [Carex littledalei]	33.2716	31.6111	23.9396	18.6247	10.1291	8.79835		Ce000029Fg22	Protein ABHD17C [Dichanthelium oligosanthes]	5.81222	12.1275	13.0757	3.35024	1.55089	0.309783		Ce000062Fg103	hypothetical protein FCM35_KLT22272 [Carex littledalei]	1.5741	1.29222	1.28077	6.27085	9.406	4.56478		Ce000036Fg118	Cytochrome b6-f complex iron-sulfur subunit [Carex littledalei]	2.69053	3.3363	0.975581	3.47746	2.68048	7.06274
Ce000017Fg148	palmitoyltransferase ZDHHC17-like isoform X3 [Carex littledalei]	25.2205	21.6056	16.7075	15.7113	13.4158	9.25559		Ce000029Fg28	probable glucuronosyltransferase Os06g0687900 [Panicum hallii]	61.3191	72.5019	51.1482	18.7811	16.0253	7.75277		Ce000062Fg104	aminoacylase-1-like protein [Carex littledalei]	11.6708	15.4454	17.6665	50.7996	54.3557	40.7061		Ce000036Fg46	transcription initiation factor IIA subunit 2 [Carex littledalei]	7.82702	6.13958	5.92764	6.65504	8.99723	19.2698
Ce000017Fg151	protein spotted leaf 11-like protein [Carex littledalei]	58.0233	48.9381	37.5954	18.2466	13.5303	9.02528		Ce000029Fg83	NAD(P)H dehydrogenase (quinone) FQR1-like [Panicum miliaceum]	127.059	136.17	152.887	15.715	10.2583	1.36165		Ce000062Fg54_Ce000062Fg55	dicarboxylate transporter 2.1 [Carex littledalei]	5.71483	6.63105	7.70961	11.6461	10.3996	2.89634		Ce000036Fg66	CCAAT-binding protein subunit HAP3 [Carex littledalei]	5.6372	4.02464	4.90481	8.53064	10.4074	25.4318
Ce000017Fg153	heat shock protein 70 [Oryza sativa Indica Group]	611.674	392.345	432.002	202.542	230.028	109.548		Ce000030Fg110	putative protein TPRXL [Carex littledalei]	28.8116	29.224	38.4684	8.92454	6.93847	3.44378		Ce000063Fg138	zinc-finger of the FCS-type, C2-C2 [Carex littledalei]	4.68121	10.6608	12.4505	16.9303	18.2474	5.97104		Ce000036Fg76	double-stranded RNA-binding protein 8-like protein [Carex littledalei]	9.28874	8.62583	10.3026	13.7439	13.6625	19.9031
Ce000017Fg157		26.5799	17.7152	14.4792	12.214	8.49876	8.94362		Ce000030Fg119	LOW QUALITY PROTEIN: mitogen-activated protein kinase kinase kinase 18 [Elaeis guineensis]	5.87095	17.4183	15.8735	1.3474	1.05265	0.261371		Ce000063Fg93	Alpha/beta hydrolase family [Carex littledalei]	16.6049	36.1661	53.9685	96.8671	67.0174	58.4709		Ce000037Fg129	Reverse transcriptase-like protein [Carex littledalei]	8.9497	6.03641	7.00065	19.6129	17.2013	24.1065
Ce000017Fg158	hypothetical protein FCM35_KLT03048 [Carex littledalei]	58.6451	42.1977	31.7834	22.7906	21.911	24.9685		Ce000030Fg120	hypothetical protein E2562_011633 [Oryza meyeriana var. granulata]	26.7174	53.1504	60.5556	6.32193	2.85087	1.55709		Ce000063Fg94	Beta-galactosidase 8 [Carex littledalei]	41.8513	135.111	118.078	134.414	116.381	74.1336		Ce000037Fg146	ribosome biogenesis protein RLP24 [Carex littledalei]	55.2102	40.4809	40.245	103.05	113.562	194.139
Ce000017Fg170	RNA and export factor-binding protein 2 [Carex littledalei]	184.866	121.613	112.486	62.973	57.3078	53.7986		Ce000030Fg126	MALE GAMETOPHYTE DEFECTIVE [Trema orientale]	119.99	123.024	125.612	93.7218	86.0038	42.8255		Ce000064Fg24	UDP-arabinose 4-epimerase 1 [Carex littledalei]	48.7476	56.5233	44.9594	81.5912	63.214	17.7083		Ce000037Fg161		14.9513	11.6378	16.2239	24.5956	26.8416	36.2929
Ce000017Fg179	histone H2A-like protein [Carex littledalei]	137.272	65.4711	43.0613	14.867	14.5441	9.53631		Ce000030Fg26	transmembrane protein 97-like protein [Carex littledalei]	67.8974	79.0451	99.5876	66.2913	54.1077	24.2153		Ce000064Fg25	protein PAT1 1-like protein [Carex littledalei]	18.4052	8.65699	13.4081	17.2991	18.6457	10.3463		Ce000037Fg165	serine/threonine-protein kinase PBS1-like protein [Carex littledalei]	4.96885	3.49489	3.38553	9.92096	13.6088	16.2365
Ce000017Fg183	PREDICTED: histone H2B.7-like [Tarenaya hassleriana]	78.4268	37.4807	24.1031	8.18004	10.0084	8.23878		Ce000030Fg64	protein disulfide isomerase-like 5-4 isoform X1 [Carex littledalei]	23.954	30.4879	18.35	14.2848	13.6331	10.4094		Ce000064Fg52	hypothetical protein FCM35_KLT13817 [Carex littledalei]	7.51317	11.8285	22.3953	37.9684	36.9689	25.0589		Ce000037Fg167	Xylose isomerase [Ananas comosus]	41.0774	20.0761	21.2099	36.3856	37.022	82.7851
Ce000017Fg186	PREDICTED: histone H2B.7-like [Tarenaya hassleriana]	90.9162	31.2809	37.636	29.3502	30.9543	43.8193		Ce000030Fg95	protein ENHANCED DISEASE RESISTANCE 2-like isoform X2 [Carex littledalei]	11.3018	11.2748	10.3829	7.21879	5.26811	4.17256		Ce000064Fg56	Pentatricopeptide repeat-containing protein [Carex littledalei]	2.64316	5.89445	5.40465	5.10278	6.36934	2.04139		Ce000037Fg30	armadillo repeat-containing protein 7 [Carex littledalei]	4.53678	3.27463	3.58054	15.9746	23.1909	30.8018
Ce000017Fg187	2-oxoglutarate dehydrogenase [Carex littledalei]	25.4848	21.2075	14.5151	11.9859	12.8359	17.6573		Ce000030Fg97	hypothetical protein FCM35_KLT16390 [Carex littledalei]	169.048	218.788	198.633	97.4834	87.4773	81.1786		Ce000064Fg60	maltose excess protein 1-like [Carex littledalei]	8.22826	33.772	35.0829	34.5278	29.284	15.5736		Ce000037Fg35	rubisco accumulation factor 1 [Carex littledalei]	3.08164	4.24637	8.81	31.1758	25.726	30.0787
Ce000017Fg34	endoplasmin [Carex littledalei]	81.3519	72.2143	49.2718	22.3073	20.8179	7.95629		Ce000031Fg11	heat stress transcription factor B-2b-like protein [Carex littledalei]	44.8226	55.4821	98.5362	30.5764	35.8557	27.7879		Ce000064Fg78	DAG protein [Carex littledalei]	9.80856	4.49578	8.67082	30.9428	24.448	23.5752		Ce000037Fg59	translin-like protein [Carex littledalei]	7.30668	6.33093	10.4483	18.5449	22.2464	22.7577
Ce000017Fg35	acyl-CoA-binding domain-containing protein 3-like protein [Carex littledalei]	19.2293	17.2392	7.39444	4.22906	4.9566	6.54859		Ce000031Fg123	peamaclein-like protein [Carex littledalei]	27.0964	113.895	62.852	2.41316	3.2726	0.82681		Ce000065Fg6	ferredoxin, root R-B1 [Carex littledalei]	12.6507	20.4891	34.449	59.1902	68.5375	59.1557		Ce000037Fg62	UDP-glycosyltransferase 86A1 [Carex littledalei]	0.005843	0.092504	3.64387	28.0533	29.4105	34.1383
Ce000017Fg36	signal peptidase complex catalytic subunit SEC11A [Sorghum bicolor]	54.0045	48.9519	37.3634	23.1138	19.4336	14.1024		Ce000031Fg14	transcription factor bHLH35 isoform X2 [Carex littledalei]	243.703	442.496	323.54	36.1129	15.687	6.76644		Ce000065Fg75	GeBP transcription factor [Carex littledalei]	1.9047	1.60182	1.63666	5.76408	5.06217	3.36785		Ce000037Fg78	RNA pseudouridine synthase [Carex littledalei]	3.90367	2.7242	2.96253	7.57227	5.52824	9.98721
Ce000017Fg41	rac-like GTP-binding protein 7 [Artemisia annua]	99.9133	104.002	76.5219	48.2921	39.7165	18.4384		Ce000031Fg152	Late embryogenesis abundant protein [Carex littledalei]	18.2078	17.4599	16.315	11.313	8.11184	3.99301		Ce000066Fg105	Ribosome maturation factor RimM [Carex littledalei]	5.81667	6.52223	7.7019	12.5402	9.5001	6.56063		Ce000038Fg15		5.40327	5.16842	4.57533	8.27318	13.5712	14.179
Ce000017Fg5	lipid transfer-like protein VAS isoform X1 [Carex littledalei]	48.606	26.7599	12.3268	19.7015	14.9283	3.07789		Ce000031Fg156	Translocation protein sec62 [Carex littledalei]	36.5781	36.4901	33.9785	21.8629	19.7905	14.5695		Ce000066Fg110	cold-regulated 413 inner membrane protein 1 [Carex littledalei]	78.7848	4169.97	7223.03	13175.2	10367.5	2224.95		Ce000038Fg43	hypothetical protein FCM35_KLT21236 [Carex littledalei]	9.63845	2.05779	8.98649	54.9954	136.709	186.574
Ce000017Fg73	aspartic proteinase-like protein 1 [Carex littledalei]	83.8366	87.1831	53.7	18.3725	14.1428	2.59386		Ce000031Fg22	7-dehydrocholesterol reductase [Carex littledalei]	64.112	77.3348	52.8405	32.1478	26.106	6.95223		Ce000066Fg127	carboxyl-terminal-processing peptidase 1 [Carex littledalei]	5.96401	7.07245	9.1767	12.5952	11.9343	5.25583		Ce000038Fg44	hypothetical protein EJB05_51508, partial [Eragrostis curvula]	4.12472	4.71289	4.28723	8.40891	6.95734	10.5634
Ce000017Fg79	protein S-acyltransferase 10-like protein [Carex littledalei]	28.5835	20.2084	13.5163	7.24658	4.91803	4.26353		Ce000031Fg6	cytochrome P450 CYP73A100 [Sorghum bicolor]	85.2931	197.033	178.889	41.2214	17.4696	1.93962		Ce000066Fg132	GTPase Era [Carex littledalei]	6.4588	7.49032	9.0384	13.9676	13.8128	14.2194		Ce000038Fg69	aarF domain-containing protein kinase [Carex littledalei]	20.0979	12.9232	21.0225	36.0265	42.0189	48.7445
Ce000017Fg94	hypothetical protein FCM35_KLT01777 [Carex littledalei]	16.423	6.38935	5.65745	5.31162	4.20031	0.559886		Ce000031Fg78	Ricin-type beta-trefoil lectin domain-like protein [Carex littledalei]	125.221	313.876	137.244	31.2063	16.1591	1.25199		Ce000066Fg133	F-box protein [Carex littledalei]	2.83159	1.76056	1.90602	10.9084	8.33299	5.05019		Ce000038Fg75	KH domain, STAR protein, homodimerization region [Artemisia annua]	31.4491	31.823	43.0582	135.413	139.081	287.97
Ce000017Fg97	chitinase 1-like protein [Carex littledalei]	77.4621	37.5684	19.0868	1.15749	0.147733	0.183239		Ce000032Fg106	Protein QUIRKY [Carex littledalei]	166.904	205.16	117.818	66.5445	37.6667	24.6352		Ce000066Fg64	hypothetical protein FCM35_KLT21334 [Carex littledalei]	7.96356	19.8409	19.4603	29.9585	24.836	25.7771		Ce000038Fg85	hypothetical protein GOBAR_AA20418 [Gossypium barbadense]	39.8277	21.9684	41.2822	182.299	220.002	382.807
Ce000018Fg127	hypothetical protein FCM35_KLT09896 [Carex littledalei]	20.2309	21.431	14.2338	8.24755	5.31473	2.74796		Ce000032Fg141	Ubiquinol-cytochrome-c reductase complex assembly factor 1 [Carex littledalei]	34.5073	37.5818	29.7103	15.6255	13.6568	7.14976		Ce000066Fg95	hypothetical protein AQUCO_02000158v1 [Aquilegia coerulea]	2.95418	1.51621	2.84842	8.49647	7.12972	3.16617		Ce000038Fg90	unnamed protein product [Digitaria exilis]	5.02954	4.75218	5.33389	7.30989	7.33946	10.1792
Ce000018Fg157	vesicle-associated membrane protein 727 [Carex littledalei]	21.9135	12.0335	13.4535	17.4038	17.9196	9.90721		Ce000032Fg142_Ce000032Fg143	nucleobase-ascorbate transporter 11-like protein [Carex littledalei]	36.0626	47.4614	42.5622	10.6915	5.78556	0.841129		Ce000066Fg96	DUF561 domain-containing protein [Gossypium australe]	1.25093	12.9024	15.853	52.9147	42.7267	13.7157		Ce000039Fg104	eukaryotic translation initiation factor 3 subunit L-like protein [Carex littledalei]	79.6799	59.5234	69.661	135.779	136.27	338.709
Ce000018Fg159	hypothetical protein SEVIR_2G223200v2 [Setaria viridis]	48.5805	26.3322	17.0039	6.1179	7.35422	6.88894		Ce000032Fg147	hypothetical protein AQUCO_01300831v1 [Aquilegia coerulea]	245.805	237.762	246.379	172.166	140.025	104.443		Ce000067Fg25	ubiquitin-like-specific protease 1D isoform X1 [Carex littledalei]	10.0849	11.6598	12.9657	20.2668	18.0045	14.6495		Ce000039Fg147	lon protease [Carex littledalei]	38.1748	35.9859	49.7907	121.298	98.6921	169.972
Ce000018Fg175	hypothetical protein FCM35_KLT09860 [Carex littledalei]	70.366	54.169	34.584	13.5983	12.2697	6.85811		Ce000032Fg152	(S)-ureidoglycine aminohydrolase isoform X1 [Carex littledalei]	63.8194	75.9734	56.343	25.4779	13.9597	37.8845		Ce000067Fg73	unnamed protein product [Triticum turgidum subsp. durum]	14.3818	26.4255	24.9814	31.1995	29.0044	21.4837		Ce000039Fg148	lon protease [Carex littledalei]	63.6819	49.1407	72.5694	194.452	165.364	352.492
Ce000018Fg186	GDP-mannose transporter GONST1 [Carex littledalei]	12.3213	7.2413	5.30789	3.27685	2.50126	2.15446		Ce000032Fg163	putative inactive poly [Carex littledalei]	34.9011	37.1839	30.863	12.8693	10.1711	8.36922		Ce000067Fg87	Ring finger domain-containing protein [Carex littledalei]	32.7616	25.0487	34.6863	81.3051	79.2444	50.8317		Ce000039Fg152	late embryogenesis abundant protein Lea14-A [Phoenix dactylifera]	5.2955	0.50056	17.0257	83.4091	168.014	754.375
Ce000018Fg21	desumoylating isopeptidase 1 [Carex littledalei]	62.2119	34.446	21.6084	2.07967	2.99683	2.72341		Ce000032Fg27	synaptotagmin-3-like protein [Carex littledalei]	4.73219	16.3855	30.7559	5.20636	4.09308	0.584541		Ce000067Fg94	oleosin 5 [Elaeis guineensis]	0.980555	3.38017	151.128	3787.28	4193.89	3353.88		Ce000039Fg158	3-methyl-2-oxobutanoate hydroxymethyltransferase-like protein [Carex littledalei]	16.9697	4.98754	5.20361	28.3054	49.8976	77.8772
Ce000018Fg3	F-box protein [Carex littledalei]	20.1509	12.5397	9.30793	3.29625	5.20717	1.84067		Ce000032Fg65	TVP38/TMEM64 family membrane protein [Carex littledalei]	203.889	219.702	214.742	118.478	121.911	55.3289		Ce000068Fg106	hypothetical protein FCM35_KLT16102 [Carex littledalei]	12.975	23.7825	37.4235	26.375	27.0633	24.4633		Ce000039Fg57	adenine nucleotide transporter BT1 [Carex littledalei]	27.1359	30.121	27.3119	49.7966	49.1122	65.5836
Ce000018Fg33	cytochrome c1-2, heme protein [Carex littledalei]	76.5986	61.7435	52.9244	28.1028	24.9932	17.3518		Ce000032Fg74_Ce000032Fg75	serine/threonine-protein kinase HT1 isoform X1 [Carex littledalei]	14.4166	17.6357	30.5992	6.39621	3.55454	4.352		Ce000068Fg22	50S ribosomal protein L19 [Carex littledalei]	7.54569	13.9973	14.2785	20.7385	20.3093	15.2099		Ce000039Fg81	hypothetical protein FCM35_KLT05625 [Carex littledalei]	1.74796	0.961547	0.847361	2.718	4.41937	7.68865
Ce000018Fg41	hypothetical protein GW17_00004534, partial [Ensete ventricosum]	286.631	196.937	191.148	205.041	127.993	105.662		Ce000032Fg76	--	22.6885	34.76	51.5657	16.3621	7.54855	6.56276		Ce000068Fg34	oleosin [Carex littledalei]	54.7354	782.368	1592.56	17080.9	22116.5	18282.8		Ce000040Fg124	serine/threonine-protein kinase CTR1-like protein [Carex littledalei]	21.6465	11.9999	10.301	20.3347	19.8354	26.9724
Ce000018Fg61	exosome complex component CSL4 isoform X2 [Phoenix dactylifera]	15.5369	7.75772	7.10214	11.3653	13.506	8.69774		Ce000032Fg97	putative xyloglucan endotransglucosylase/hydrolase protein 31 [Carex littledalei]	57.3847	165.367	116.703	0.529682	0.321219	0		Ce000068Fg35	hypothetical protein FCM35_KLT16184 [Carex littledalei]	5.52848	2.8933	17.2995	12.2931	18.7333	6.43687		Ce000040Fg135_Ce000040Fg136	putative aldo-keto reductase 2 [Carex littledalei]	11.5919	28.675	26.2144	51.0335	37.8115	82.631
Ce000018Fg82	Tetraspanin-18 [Ananas comosus]	93.3177	93.1974	66.8932	29.7308	27.7802	36.0158		Ce000033Fg40	hypothetical protein FCM35_KLT06013 [Carex littledalei]	46.7379	48.3443	59.2829	40.5612	56.1848	15.7461		Ce000068Fg74	hypothetical protein FCM35_KLT16138 [Carex littledalei]	100.088	246.333	537.897	456.697	318.888	50.6427		Ce000040Fg38	Protein YLS9 [Carex littledalei]	0.798273	0.53411	0.956885	1.40206	2.88903	6.45695
Ce000018Fg9	glutathione reductase, cytosolic [Carex littledalei]	185.207	134.555	116.719	39.1368	46.2178	32.5707		Ce000033Fg43	hypothetical protein FCM35_KLT06010 [Carex littledalei]	3.25798	23.2683	27.6745	1.05394	0.839293	2.14308		Ce000068Fg89	RING-H2 finger protein ATL11-like protein [Carex littledalei]	31.8763	12.1931	10.8698	29.6671	69.9512	25.1361		Ce000040Fg49	ribosome maturation protein SBDS [Carex littledalei]	14.7286	10.1514	17.1433	22.0967	25.3329	33.0754
Ce000020Fg139	hypothetical protein DKX38_004133 [Salix brachista]	56.6433	34.3779	33.2627	27.3708	23.7392	14.2496		Ce000033Fg67	LOB domain-containing protein 40-like protein [Carex littledalei]	85.0767	243.631	268.345	157.934	213.927	64.6804		Ce000069Fg109	Calvin cycle protein CP12-1 [Carex littledalei]	14.6972	2.69967	6.24915	40.4639	5.24827	24.2822		Ce000040Fg5	protein KTI12 [Carex littledalei]	15.2877	10.0477	9.89228	20.3772	20.7537	34.8903
Ce000020Fg141	probable LRR receptor-like serine/threonine-protein kinase At1g63430 isoform X3 [Phoenix dactylifera]	16.6196	7.83772	9.72788	6.20281	3.68375	0.782167		Ce000034Fg139	putative Pollen specific protein C13 precursor [Carex littledalei]	121.858	189.376	115.402	17.5455	12.0696	1.20626		Ce000069Fg121	peptide chain release factor PrfB2, chloroplastic isoform X2 [Phoenix dactylifera]	4.03031	6.82417	7.51258	10.0811	7.1704	5.0206		Ce000040Fg65	Glutathione S-transferase domain-containing protein [Carex littledalei]	10.4784	19.1606	22.1831	37.9614	40.8414	54.4079
Ce000020Fg146	putative ascorbate-specific transmembrane electron transporter 1 [Carex littledalei]	70.8954	17.5576	11.758	10.9739	9.92881	22.0756		Ce000034Fg155	putative leucine-rich repeat-containing protein [Carex littledalei]	20.475	28.7158	20.7192	8.93291	4.25226	1.22802		Ce000069Fg124	outer envelope pore protein 16-2 [Carex littledalei]	6.56401	27.2827	243.656	1710.72	2155.05	1593.89		Ce000041Fg101	mitochondrial import receptor subunit TOM20-like protein [Carex littledalei]	71.5517	51.9811	65.3468	128.42	137.884	293.419
Ce000020Fg155	PREDICTED: uncharacterized protein LOC103984761 [Musa acuminata subsp. malaccensis]	24.2251	23.7616	18.5674	17.3572	19.1	10.001		Ce000034Fg159	hypothetical protein FCM35_KLT08030 [Carex littledalei]	121.101	153.728	276.156	82.7163	54.6694	18.741		Ce000069Fg25	hypothetical protein TEA_022950 [Camellia sinensis var. sinensis]	1.90291	3.61473	4.48319	11.0512	11.4612	5.80845		Ce000041Fg126	hypothetical protein FCM35_KLT00245 [Carex littledalei]	4.90221	5.25896	12.1226	18.2771	22.3979	22.0303
Ce000020Fg157	glutamyl-tRNA reductase 2 [Carex littledalei]	59.8392	57.037	24.8531	7.97349	9.59028	5.72546		Ce000034Fg34	alanine aminotransferase 2 isoform X1 [Sorghum bicolor]	76.0353	157.06	209.71	129.731	66.9938	19.5229		Ce000069Fg35	ribulose bisphosphate carboxylase small chain, chloroplastic-like [Phoenix dactylifera]	0.610369	47.4075	102.866	180.347	307.449	63.0319		Ce000041Fg127	cytochrome b-c1 complex subunit Rieske-4, mitochondrial [Elaeis guineensis]	2.96694	1.17649	9.36965	29.5162	55.7078	128.059
Ce000020Fg186	ALG-2 interacting protein X-like protein [Carex littledalei]	47.18	24.5813	25.8966	6.91947	7.14865	4.11215		Ce000034Fg44	red chlorophyll catabolite reductase-like protein [Carex littledalei]	5.08902	14.1636	25.8195	16.0098	12.8876	6.92877		Ce000069Fg61	glucose-6-phosphate 1-dehydrogenase 4 [Carex littledalei]	4.75176	5.26652	6.40983	8.3326	10.6378	4.58545		Ce000041Fg20	nucleolar GTP-binding protein 1 [Dendrobium catenatum]	25.6147	14.7946	20.9457	54.3784	42.1368	74.7978
Ce000020Fg42	ethylene-responsive transcription factor ERF026-like protein [Carex littledalei]	41.0039	7.52586	4.93614	5.89829	1.23269	2.40043		Ce000034Fg91	E3 ubiquitin-protein ligase ATL6 [Carex littledalei]	1.02029	10.6825	5.24523	0.447549	0.503879	0.118048		Ce000069Fg81	GPN-loop GTPase 1 isoform X1 [Carex littledalei]	11.2048	20.0986	24.3602	35.0436	23.1315	24.4823		Ce000041Fg78	hypothetical protein FCM35_KLT00438 [Carex littledalei]	3.33708	2.6179	2.7083	4.53101	4.54335	8.04819
Ce000020Fg47	Dehydrodolichyl [Carex littledalei]	26.0523	11.3378	7.02974	12.3877	13.776	8.95338		Ce000034Fg94	transcription factor bHLH94-like protein [Carex littledalei]	161.499	178.873	128.223	67.3416	42.7236	1.91058		Ce000070Fg36	sucrose synthase 2 [Carex littledalei]	169.202	1028.5	1077.17	1359.8	973.658	528.895		Ce000042Fg106	Ribulose bisphosphate carboxylase/oxygenase activase, chloroplastic [Morella rubra]	2.97575	4.82782	7.58919	5.16996	11.4176	12.0371
Ce000020Fg50	40S ribosomal protein S23 isoform X1 [Lactuca sativa]	103.022	79.3861	83.0222	68.2577	48.4277	25.5668		Ce000035Fg1	cysteine proteinase inhibitor isoform X2 [Carex littledalei]	117.436	163.346	200.238	131.543	116.789	55.5055		Ce000070Fg38	hypothetical protein FCM35_KLT12195 [Carex littledalei]	34.9571	45.0388	43.6887	92.9454	73.9299	55.5655		Ce000042Fg149	Mitochondrial glycoprotein [Carex littledalei]	3.50258	3.81236	5.42251	9.20225	7.27282	9.71965
Ce000020Fg55	inactive rhomboid protein 1-like protein [Carex littledalei]	23.1278	19.6817	10.2509	6.14661	7.65187	3.76056		Ce000035Fg116	protein G1-like7 [Carex littledalei]	7.20086	17.001	13.7919	2.72293	3.02297	2.67127		Ce000070Fg41	chaperonin [Carex littledalei]	22.6592	36.1044	60.8161	62.6731	65.0538	40.7792		Ce000042Fg159	Small RNA degrading nuclease 3 [Carex littledalei]	18.5132	5.11393	6.77059	15.5818	12.057	16.8877
Ce000020Fg7	hypothetical protein TanjilG_00916 [Lupinus angustifolius]	178.235	94.209	87.7851	113.201	80.257	101.141		Ce000035Fg125	Serine/threonine-protein kinase EDR1 [Morella rubra]	28.9572	41.8135	35.5883	29.6098	17.1625	10.0018		Ce000070Fg45	zinc-finger of the FCS-type, C2-C2 [Carex littledalei]	98.3687	154.768	262.063	186.719	248.025	85.9022		Ce000042Fg161	oryzain alpha chain [Carex littledalei]	223.908	128.172	160.509	269.538	171.027	509.418
Ce000020Fg72	calcium-binding protein KIC [Carex littledalei]	18.9504	21.5095	12.3765	9.13791	11.0149	15.2406		Ce000035Fg136	heavy metal-associated isoprenylated plant protein 26-like protein [Carex littledalei]	67.0997	154.429	97.1837	4.92866	1.30862	2.16059		Ce000071Fg101	Bifunctional epoxide hydrolase 2 [Carex littledalei]	43.2597	25.1804	30.8675	115.962	156.263	64.8772		Ce000042Fg17	glucose-6-phosphate 1-epimerase [Carex littledalei]	6.22669	10.6	9.69882	16.6459	24.2085	23.492
Ce000020Fg84	cytochrome b5 isoform A-like protein [Carex littledalei]	70.3862	42.9396	36.8964	30.7895	39.4417	32.0792		Ce000035Fg137	putative cyclin-dependent serine/threonine-protein kinase [Carex littledalei]	59.7135	282.803	229.532	45.7566	28.5082	18.1686		Ce000071Fg33	hypothetical protein TEA_014988 [Camellia sinensis var. sinensis]	12.6302	9.80433	14.3137	25.9394	18.176	21.8125		Ce000042Fg36	hypothetical protein FCM35_KLT19138 [Carex littledalei]	0.044572	1.18757	1.31086	9.89428	52.3036	173.909
Ce000021Fg106	Dual specificity protein kinase YAK1 [Carex littledalei]	30.2533	27.1419	24.6432	13.0936	10.2047	5.9892		Ce000035Fg139		0.643106	29.1727	31.9004	1.15477	0.174638	0		Ce000071Fg74	E3 ubiquitin-protein ligase RNF8-like protein [Carex littledalei]	7.6804	7.83909	12.8163	32.2909	19.3018	14.5693		Ce000042Fg52	protein SAWADEE HOMEODOMAIN 1-like isoform X2 [Carex littledalei]	9.18904	4.1737	6.86269	23.5328	17.2025	25.1784
Ce000021Fg117	3-dehydrosphinganine reductase TSC10A [Carex littledalei]	19.6951	18.3248	11.5116	6.47614	4.62753	2.72301		Ce000035Fg159	aspartate--tRNA ligase [Carex littledalei]	269.941	841.403	1123.96	274.35	150.717	53.1559		Ce000071Fg8	hypothetical protein F2Q70_00033618 [Brassica cretica]	4.93782	188.526	204.367	579.5	538.103	49.6253		Ce000042Fg66		1.78396	2.9998	5.73187	2.8008	9.79383	9.74401
Ce000021Fg136	protein FAR-RED IMPAIRED RESPONSE 1-like protein [Carex littledalei]	61.5146	41.6317	36.869	34.128	30.397	27.9667		Ce000035Fg161	AP-1 complex subunit mu [Vigna unguiculata]	96.9291	101.93	94.799	68.0789	57.9205	35.9001		Ce000072Fg27	E3 ubiquitin-protein ligase RNF19B-like protein [Carex littledalei]	1.46336	2.68838	7.2199	8.26743	11.3422	0.952942		Ce000042Fg70	isoamylase 1 [Carex littledalei]	15.1148	21.9268	17.7176	19.6659	33.3293	29.3358
Ce000021Fg152	unnamed protein product [Digitaria exilis]	53.9612	56.0736	31.8824	18.4852	11.5154	17.4384		Ce000035Fg173	SPX domain-containing membrane protein [Carex littledalei]	190.187	208.962	190.417	42.6483	29.8175	24.4366		Ce000072Fg34	hypothetical protein F2Q70_00013608, partial [Brassica cretica]	8.44126	9.37275	8.07005	17.6697	23.0932	17.8951		Ce000042Fg87	Pyridoxamine 5'-phosphate oxidase [Carex littledalei]	27.8905	25.2861	29.3455	47.822	57.189	92.5518
Ce000021Fg154	transcription factor PIF4-like isoform X2 [Carex littledalei]	22.3588	15.8332	21.1863	17.6514	8.77032	3.64728		Ce000035Fg180	BAG family molecular chaperone regulator 1-like protein [Carex littledalei]	114.191	180.766	151.073	31.0546	14.5329	3.41233		Ce000072Fg38	CBL-interacting serine/threonine-protein kinase 5 [Phoenix dactylifera]	68.982	51.5797	73.364	98.5421	92.1862	13.0907		Ce000042Fg89	hypothetical protein FCM35_KLT16330 [Carex littledalei]	7.89016	3.98211	4.43599	10.3961	11.6244	17.7779
Ce000021Fg157	Protein LOL2 [Carex littledalei]	27.9254	20.3568	12.7281	3.15711	3.144	2.33918		Ce000035Fg181	transcriptional regulator SLK2 [Carex littledalei]	140.441	159.378	137.011	55.3562	42.3048	30.3923		Ce000073Fg11	Mini-ribonuclease 3 [Carex littledalei]	2.44094	2.04474	1.95617	6.49973	6.11616	5.18508		Ce000043Fg109	paramyosin-like protein [Carex littledalei]	13.5629	20.314	29.0526	84.1054	95.2974	103.405
Ce000021Fg158	actin-related protein 7 [Carex littledalei]	19.6031	7.92129	5.69598	8.10421	9.67376	7.31369		Ce000035Fg19	UDP-glycosyltransferase 87A2 [Elaeis guineensis]	2.72049	10.6624	21.3595	2.19722	4.33685	0.344056		Ce000073Fg110	glutelin type-B 4-like protein [Carex littledalei]	1.18963	15.8149	36.766	214.736	54.3897	71.0027		Ce000043Fg11	40S ribosomal protein S24-1-like protein [Carex littledalei]	82.4149	64.0942	83.0918	129.06	124.552	185.795
Ce000021Fg169	ferredoxin--NADP reductase, root isozyme [Carex littledalei]	77.3307	69.5813	60.2935	37.444	38.4729	12.082		Ce000035Fg4	Calcineurin B-like protein 9 [Triticum urartu]	2.61723	8.92397	4.48531	2.40015	1.77662	0.204893		Ce000074Fg115	abscisic acid receptor PYL8 isoform X2 [Elaeis guineensis]	70.8163	64.5059	73.6188	351.007	387.707	165.62		Ce000043Fg132		1.67509	0.175838	0.289957	13.2825	29.181	35.9833
Ce000021Fg23	WEB family protein [Carex littledalei]	25.2996	25.0797	20.5758	10.1469	6.78715	2.90488		Ce000035Fg41	hypothetical protein FCM35_KLT04040 [Carex littledalei]	301.799	344.056	269.117	210.434	178.237	115.665		Ce000074Fg116	hypothetical protein FCM35_KLT05687 [Carex littledalei]	36.5414	95.5064	70.1434	94.9823	85.3175	41.3615		Ce000043Fg50	hypothetical protein FCM35_KLT07094 [Carex littledalei]	4.42417	2.21309	7.30812	81.4221	137.885	288.483
Ce000021Fg25	SNARE associated Golgi protein [Carex littledalei]	29.8511	23.5378	9.83967	10.1172	17.6577	19.9288		Ce000035Fg48	hypothetical protein FCM35_KLT04030 [Carex littledalei]	6.31048	14.2498	10.6038	9.46973	11.4927	10.3311		Ce000074Fg25	bZIP transcription factor TRAB1-like isoform X1 [Carex littledalei]	34.0408	55.7175	66.209	97.2034	93.9834	78.2128		Ce000043Fg89	NADPH-dependent diflavin oxidoreductase 1 isoform X1 [Carex littledalei]	11.052	8.37383	7.72983	14.4286	15.8013	23.6511
Ce000021Fg39	putative xyloglucan endotransglucosylase/hydrolase protein 30 [Carex littledalei]	55.8731	25.7156	11.8348	3.26799	1.22851	0.367681		Ce000035Fg49	calmodulin-7 isoform X1 [Carex littledalei]	16.4406	471.459	407.687	289.697	265.816	148.736		Ce000074Fg26		9.97568	21.9004	24.5931	28.7933	28.1985	12.1321		Ce000044Fg121	prolyl endopeptidase-like protein [Carex littledalei]	29.4257	4.52019	8.41181	48.3543	47.2225	101.85
Ce000021Fg42	lysine-specific demethylase JMJ706-like isoform X2 [Carex littledalei]	34.6447	27.4581	15.491	6.42357	4.57145	1.34492		Ce000035Fg5	cytochrome P450 98A1 [Setaria italica]	669.192	1230.33	1001.66	366.205	203.488	144.03		Ce000074Fg27	Protein DJ-1 [Carex littledalei]	3.4249	3.21986	5.08822	7.15951	7.28137	5.2397		Ce000044Fg128	Histone-lysine N-methyltransferase, H3 lysine-9 specific SUVH6 [Carex littledalei]	14.6283	7.63507	9.21226	32.2446	37.8976	53.2013
Ce000021Fg46	TOM1-like protein 2 [Carex littledalei]	96.4531	88.732	88.2658	65.0027	62.0185	39.8668		Ce000035Fg55	glutamine--fructose-6-phosphate aminotransferase [Carex littledalei]	25.7071	53.0061	29.5896	10.8856	7.7933	8.16136		Ce000074Fg82	hypothetical protein FCM35_KLT05707 [Carex littledalei]	7.28861	8.47616	10.2301	11.2335	15.4551	12.81		Ce000044Fg131	pentatricopeptide repeat-containing protein [Carex littledalei]	15.4141	8.01255	8.79873	21.1131	17.6185	42.4556
Ce000021Fg50	hypothetical protein FCM35_KLT13754 [Carex littledalei]	21.3812	8.84064	10.1547	5.82346	5.88715	1.71464		Ce000035Fg63	protein YLS9-like protein [Carex littledalei]	123.766	381.248	255.618	7.43718	6.46613	5.2424		Ce000075Fg11	hypothetical protein FCM35_KLT20722 [Carex littledalei]	9.30817	124.993	197.945	369.15	510.821	178.744		Ce000044Fg143	DNA mismatch repair protein MLH1 isoform X1 [Carex littledalei]	15.5031	10.4414	11.4896	29.1485	25.0497	34.7665
Ce000021Fg58	hypothetical protein FCM35_KLT13763 [Carex littledalei]	82.724	10.172	25.1337	55.4296	39.2648	16.8214		Ce000035Fg64	F-box protein [Carex littledalei]	101.51	169.846	167.628	59.6914	49.3134	49.951		Ce000076Fg22	hypothetical protein F2Q70_00033618 [Brassica cretica]	2.58947	92.1691	123.539	607.866	580.393	62.2067		Ce000044Fg20	hypothetical protein GW17_00014219 [Ensete ventricosum]	21.0227	15.0893	22.6748	61.5019	69.6258	108.547
Ce000021Fg59	hypothetical protein FCM35_KLT13764 [Carex littledalei]	98.2799	73.9865	68.6288	22.5295	11.3812	2.24405		Ce000035Fg65	endoplasmic reticulum-Golgi intermediate compartment protein 3-like protein [Carex littledalei]	190.788	196.892	225.332	67.6983	71.0221	99.7594		Ce000076Fg92	U-box domain-containing protein 4 [Carex littledalei]	39.6826	22.7037	44.2732	55.5848	72.6435	14.2913		Ce000044Fg55	malate dehydrogenase [Carex littledalei]	22.3348	5.2702	9.23326	23.7229	29.6682	53.3781
Ce000021Fg67	PWWP domain-containing protein [Carex littledalei]	67.8304	33.3579	27.0075	22.2647	22.8321	15.519		Ce000035Fg82	hypothetical protein FCM35_KLT03999 [Carex littledalei]	163.438	173.08	134.182	108.281	82.0964	54.6969		Ce000076Fg97	arogenate dehydratase 3 [Carex littledalei]	38.6166	37.7372	85.582	74.8289	59.8968	10.0066		Ce000044Fg69	arginine decarboxylase-like protein [Carex littledalei]	0.710549	0.05671	0	0.980786	3.88737	19.7741
Ce000021Fg74	hypothetical protein C4D60_Mb01t32420 [Musa balbisiana]	76.6683	63.2255	34.0295	3.19616	4.01721	10.9515		Ce000035Fg84	phosphatidylinositol 3,4,5-trisphosphate phosphatase PTEN-like protein [Carex littledalei]	43.1901	71.5227	57.4025	14.0169	10.3	1.33774		Ce000077Fg1	serpin-ZXA [Ananas comosus]	18.0154	17.2284	24.5777	55.0726	77.449	42.8977		Ce000044Fg93	Plastid division protein PDV2 [Carex littledalei]	20.3225	29.1532	30.5284	41.7542	39.547	58.0918
Ce000021Fg82	cyclin-dependent kinase F-4 [Carex littledalei]	31.527	21.5414	16.4927	17.879	14.0952	10.3854		Ce000035Fg85	phosphatidylinositol 3,4,5-trisphosphate phosphatase PTEN-like protein [Carex littledalei]	39.9114	66.7676	48.8311	12.1855	8.0069	1.12838		Ce000077Fg124	LOB domain-containing protein 4 [Carex littledalei]	9.66555	26.6347	27.7954	71.8095	61.9416	2.25016		Ce000045Fg12	ribonucleoprotein [Carex littledalei]	7.24123	6.27175	4.95131	10.7363	8.68942	22.0589
Ce000022Fg13	40S ribosomal protein S5-like protein [Carex littledalei]	24.8599	7.86894	10.562	16.5726	15.9093	16.9666		Ce000036Fg107	Lysine-specific demethylase JMJ25 [Carex littledalei]	30.5023	33.7931	33.6394	23.6158	18.399	12.4354		Ce000077Fg25	cold-regulated 413 plasma membrane protein 2-like protein [Carex littledalei]	38.547	75.5726	80.2514	134.035	157.192	124.977		Ce000045Fg122	hypothetical protein FCM35_KLT11169 [Carex littledalei]	69.7724	37.8231	28.639	85.4983	115.673	188.111
Ce000022Fg140	protein NPGR2-like isoform X1 [Ananas comosus]	15.3398	9.16057	6.65627	4.29659	5.08404	3.45968		Ce000036Fg110	equilibrative nucleotide transporter 3-like protein [Carex littledalei]	23.5261	50.6378	8.32351	3.10323	1.21751	0.292944		Ce000077Fg47	Core-2/I-Branching enzyme [Carex littledalei]	1.38373	0.783104	2.99373	5.61759	6.71705	3.41645		Ce000045Fg164	hypothetical protein FCM35_KLT01586 [Carex littledalei]	2.1317	1.06171	2.2697	15.2198	15.5198	23.2608
Ce000022Fg143	desumoylating isopeptidase 1 [Carex littledalei]	27.7457	23.887	24.2921	10.1295	10.2213	7.85467		Ce000036Fg52	hypothetical protein FCM35_KLT15116 [Carex littledalei]	24.8987	71.9075	34.2674	11.7987	11.761	0.625794		Ce000077Fg48	hypothetical protein FCM35_KLT01514 [Carex littledalei]	6.87412	9.37559	15.7241	8.75546	14.4061	7.09059		Ce000045Fg165		11.4009	12.6712	19.5782	23.143	19.677	30.242
Ce000022Fg15	sphingosine-1-phosphate lyase-like protein [Carex littledalei]	25.3863	12.1704	9.88895	10.6436	8.65998	6.1026		Ce000036Fg7	ethylene-responsive transcription factor ERF109-like protein [Carex littledalei]	38.3602	81.3597	60.9274	13.1139	3.25136	2.19187		Ce000077Fg63	homeotic protein knotted-1-like protein [Carex littledalei]	1.49518	5.60221	12.4412	7.14231	13.1512	2.56421		Ce000045Fg173	cytoplasmic tRNA 2-thiolation protein 2 [Carex littledalei]	5.97887	4.85588	7.72581	12.4056	12.063	21.6053
Ce000022Fg151	UDP-glucose:glycoprotein glucosyltransferase [Carex littledalei]	24.7339	15.3899	10.6476	13.3088	10.7545	11.5735		Ce000036Fg77	organic cation/carnitine transporter 2-like protein [Carex littledalei]	16.8979	222.666	281.237	106.982	82.6963	15.4282		Ce000077Fg74	basic leucine zipper 1-like protein [Carex littledalei]	2.50854	0.307018	3.56375	21.8122	17.2119	10.2891		Ce000045Fg64	tRNA(His) guanylyltransferase 1-like isoform X1 [Carex littledalei]	14.1607	6.64759	8.80624	24.7346	25.2215	34.7532
Ce000022Fg152	succinyl-CoA ligase [Carex littledalei]	109.306	94.1066	87.5534	57.0825	47.3937	40.2017		Ce000036Fg90	F-box protein SKIP27 [Carex littledalei]	110.13	370.103	210.342	2.37415	1.27233	0.105019		Ce000078Fg14	hypothetical protein FCM35_KLT20761 [Carex littledalei]	2.67018	1.19733	3.35653	6.68312	6.12261	1.49608		Ce000045Fg69	PREDICTED: uncharacterized protein LOC104726112 [Camelina sativa]	13.5154	9.44437	12.3103	25.3145	37.1482	55.5668
Ce000022Fg157	hypothetical protein FCM35_KLT06654 [Carex littledalei]	35.5444	35.2834	26.7172	12.0285	10.5007	7.25356		Ce000036Fg91	hypothetical protein FCM35_KLT15086 [Carex littledalei]	32.0525	34.9171	35.8526	4.11163	3.62141	15.6342		Ce000078Fg31	Chaperonin 60 subunit alpha 2 [Carex littledalei]	2.85552	1.4294	2.59193	7.79661	5.77224	3.91108		Ce000045Fg88	SOSS complex subunit B [Ananas comosus]	6.46651	4.87287	6.40625	10.5475	15.7064	20.7611
Ce000022Fg158	serine/threonine-protein kinase tricorner-like isoform X2 [Carex littledalei]	35.3913	27.2729	15.6888	3.0037	2.31305	0.889744		Ce000036Fg99	vesicle-associated protein 4-1-like protein [Carex littledalei]	36.6094	42.8316	29.5442	21.2125	17.3245	14.1887		Ce000078Fg35	B2 protein [Carex littledalei]	3.71666	2.18376	4.71795	10.4265	12.3214	9.50229		Ce000046Fg22	hypothetical protein GW17_00008273 [Ensete ventricosum]	13.1518	15.5655	15.4911	17.6538	16.9309	27.2586
Ce000022Fg159	serine/threonine-protein kinase tricorner-like isoform X2 [Carex littledalei]	59.439	43.6852	24.1904	3.14075	3.19702	1.40678		Ce000037Fg112	cell number regulator 13-like isoform X1 [Carex littledalei]	8.78269	31.3982	25.7042	7.66795	4.45147	0.177202		Ce000078Fg79	OTU domain-containing protein 3 isoform X2 [Carex littledalei]	2.74567	3.16004	2.93353	5.68767	6.29317	5.0331		Ce000046Fg3	hypothetical protein B456_013G192900 [Gossypium raimondii]	360.92	305.755	387.826	810.392	1317.03	2246.25
Ce000022Fg161	vacuolar protein sorting-associated protein 2 3 [Carex littledalei]	70.0466	39.217	33.0774	17.1895	17.1674	13.5444		Ce000037Fg118_Ce000037Fg119	DNA ligase 1-like [Ananas comosus]	50.6525	44.6453	51.3944	18.128	12.8083	9.78577		Ce000078Fg9	dihydrolipoyllysine-residue acetyltransferase component 5 of pyruvate dehydrogenase complex [Carex littledalei]	26.2223	23.5636	23.4595	62.7794	52.4523	27.5267		Ce000046Fg43	F-box/FBD/LRR-repeat protein At1g16930-like [Brassica napus]	1.24596	0.668999	0.608886	4.14048	5.25128	9.29823
Ce000022Fg162	Serine/threonine protein [Carex littledalei]	48.1031	32.0167	24.76	19.5677	16.745	11.2621		Ce000037Fg137	hypothetical protein GOBAR_AA26386 [Gossypium barbadense]	101.445	170.684	108.166	41.2279	25.0582	23.0593		Ce000078Fg97	hypothetical protein FCM35_KLT17494 [Carex littledalei]	3.75708	3.16537	4.36019	7.90137	7.4513	4.54905		Ce000047Fg18		33.991	33.473	33.679	67.5785	90.2453	102.222
Ce000022Fg180	putative glucuronosyltransferase PGSIP6-like protein [Carex littledalei]	44.5022	37.9502	35.0597	24.5841	22.1261	22.0253		Ce000037Fg179	hypothetical protein FCM35_KLT12819 [Carex littledalei]	3.88384	8.03026	10.4619	3.23794	2.56093	1.93801		Ce000079Fg43	cinnamyl alcohol dehydrogenase 1 [Carex littledalei]	23.5459	23.2524	47.1372	77.913	71.358	35.8069		Ce000047Fg19		13.5825	11.9544	10.2484	23.2737	28.9122	26.6034
Ce000022Fg185	hypothetical protein FCM35_KLT06627 [Carex littledalei]	24.9164	17.7629	16.6523	13.4365	12.8426	9.6051		Ce000037Fg180	hypothetical protein FCM35_KLT12819 [Carex littledalei]	4.13376	6.00508	8.37943	2.6956	3.18105	3.36721		Ce000079Fg49	pentatricopeptide repeat-containing protein [Carex littledalei]	3.61916	1.92333	3.29436	9.3126	6.48519	4.45447		Ce000047Fg2	hypothetical protein FCM35_KLT06005 [Carex littledalei]	2.13638	1.32146	4.48979	6.30947	4.5621	8.78063
Ce000022Fg189	Triose-phosphate Transporter family [Carex littledalei]	87.1483	5.14938	23.3222	35.9215	29.5358	11.2908		Ce000037Fg23	Sin3 binding region of histone deacetylase complex subunit SAP30 [Carex littledalei]	18.9488	25.6664	15.0726	7.66313	4.45033	2.18952		Ce000080Fg109	universal stress protein A-like protein [Carex littledalei]	91.2257	589.67	1319.83	2131.35	2224.42	1502.94		Ce000048Fg20		18.8543	6.40642	7.1053	57.8248	91.8864	93.052
Ce000022Fg190	Protein ENHANCED DISEASE RESISTANCE 2 [Carex littledalei]	335.616	114.618	70.6549	27.3159	19.0867	10.9844		Ce000037Fg68	heavy metal-associated protein [Carex littledalei]	157.248	464.783	537.09	144.74	113.444	36.4245		Ce000080Fg110	tetratricopeptide repeat protein 4 isoform X1 [Carex littledalei]	20.2426	29.0286	59.5791	36.9388	38.9238	46.7029		Ce000048Fg28	DNA topoisomerase 1-like protein [Carex littledalei]	24.0762	17.5485	16.5183	30.9709	30.9875	48.5713
Ce000022Fg191		41.6104	20.8958	34.2691	17.4506	16.2381	5.45872		Ce000037Fg87	zeaxanthin epoxidase [Carex littledalei]	8.47605	112.515	41.692	30.7792	38.2593	22.4072		Ce000080Fg111	tetratricopeptide repeat protein 4 isoform X1 [Carex littledalei]	20.9327	28.1945	61.8566	41.4932	38.6698	39.1033		Ce000048Fg37	acyl-coenzyme A thioesterase 13 [Carex littledalei]	5.44203	2.67561	2.84835	7.56569	8.19971	21.2647
Ce000022Fg193	double-stranded RNA-binding protein 6-like protein [Carex littledalei]	62.6022	45.5219	38.4012	28.9708	21.3856	8.83867		Ce000038Fg114	putative aminotransferase ACS12 [Carex littledalei]	7.24124	47.548	35.0215	23.2948	25.0615	7.42804		Ce000080Fg40	nascent polypeptide-associated complex subunit alpha-like protein 1 [Papaver somniferum]	0	0	0	133.069	147.922	0		Ce000048Fg62	mitochondrial substrate carrier family protein C-like protein [Carex littledalei]	9.73198	10.4904	9.56645	8.67922	9.3836	31.6462
Ce000022Fg60	hypothetical protein GH714_039169 [Hevea brasiliensis]	21.5213	13.7771	12.4513	8.45089	7.37866	5.15847		Ce000038Fg137	3'(2'),5'-bisphosphate nucleotidase [Carex littledalei]	25.6677	28.1795	26.8999	14.9492	11.4936	4.92565		Ce000080Fg60	Multiple organellar RNA editing factor 8 [Carex littledalei]	14.0856	6.86013	9.34391	17.9756	19.4217	11.7856		Ce000049Fg19		16.9381	15.622	7.5697	9.7683	12.1241	37.43
Ce000022Fg79	brefeldin A-inhibited guanine nucleotide-exchange protein 2-like protein [Carex littledalei]	22.7366	20.6091	10.3761	9.16037	7.15852	20.6625		Ce000038Fg144	mitogen-activated protein kinase kinase kinase YODA-like protein [Carex littledalei]	75.9778	93.3133	98.4378	24.5315	20.3557	16.4328		Ce000080Fg63	hypothetical protein E2562_025305 [Oryza meyeriana var. granulata]	41.1279	35.0685	41.1163	85.3234	74.7893	14.6873		Ce000049Fg2	PREDICTED: serine/threonine-protein kinase PBS1 [Solanum lycopersicum]	8.18831	6.43637	5.00419	7.04599	9.6666	18.6469
Ce000023Fg121	splicing factor, suppressor of white-apricot isoform X2 [Carex littledalei]	21.2767	14.2247	12.0315	14.3204	10.6184	9.24894		Ce000038Fg22	U-box domain-containing protein 16 [Carex littledalei]	74.3905	86.5792	58.1117	15.842	6.85474	7.10537		Ce000080Fg76	putative BOI-related E3 ubiquitin-protein ligase 3 isoform X2 [Carex littledalei]	25.4305	24.016	19.5785	29.574	51.6997	18.2837		Ce000049Fg52	hypothetical protein AQUCO_01400933v1 [Aquilegia coerulea]	157.324	114.952	137.582	234.573	188.294	360.14
Ce000023Fg142	GATA transcription factor 4-like protein [Carex littledalei]	24.7558	17.0251	8.82843	5.07079	3.8614	3.06608		Ce000038Fg28	expansin-A2 [Carex littledalei]	51.0814	169.393	153.132	1.4402	0.468746	0.0294077		Ce000080Fg80	hypothetical protein FCM35_KLT12272 [Carex littledalei]	70.815	33.2689	41.2482	59.0295	70.6457	34.3433		Ce000049Fg7	hypothetical protein FCM35_KLT09773 [Carex littledalei]	2.8625	0.438952	0.777215	1.34328	2.16032	8.66577
Ce000023Fg146	lysosomal beta glucosidase-like protein [Carex littledalei]	202.178	181.578	104.296	19.3806	5.23717	0.133929		Ce000038Fg70	Ethylene-responsive transcription factor CRF4 [Carex littledalei]	63.1107	63.7484	131.825	40.7646	62.8628	30.326		Ce000082Fg15	hypothetical protein FCM35_KLT17024 [Carex littledalei]	3.02966	20.4866	6.12524	11.8995	15.1422	12.0632		Ce000050Fg112	adenylosuccinate synthetase [Carex littledalei]	14.577	7.83676	11.0386	39.1472	38.1939	82.7734
Ce000023Fg147	putative phosphomevalonate kinase [Carex littledalei]	19.3438	13.5836	8.9416	9.55019	10.4936	8.29525		Ce000038Fg74	hypothetical protein CUMW_133810 [Citrus unshiu]	223.385	236.047	208.467	75.6973	50.3003	26.3877		Ce000082Fg29	Iron-sulfur assembly protein IscA [Carex littledalei]	4.84606	6.99823	9.8381	16.6658	24.8301	15.2953		Ce000050Fg123	ATP-dependent Clp protease adapter protein ClpS [Carex littledalei]	5.75993	5.72884	5.56185	10.2824	10.7033	12.5576
Ce000023Fg26	RER1B protein [Nymphaea thermarum]	101.28	87.0167	73.9967	36.5716	25.8176	30.2063		Ce000038Fg77	proline-rich receptor-like protein kinase PERK3 [Carex littledalei]	10.4384	22.7384	17.2066	7.04615	4.62663	1.11209		Ce000082Fg31	putative WRKY transcription factor 72 [Carex littledalei]	12.1645	8.43318	15.0054	35.9461	32.58	20.7415		Ce000050Fg13	stress enhanced protein 2 [Carex littledalei]	2.83791	1.75144	5.03246	13.4009	37.054	64.8576
Ce000023Fg41	hypothetical protein FCM35_KLT18162 [Carex littledalei]	12.8565	7.95291	8.19428	6.12559	4.59681	3.10434		Ce000038Fg8	alanine--glyoxylate aminotransferase 2 3 [Carex littledalei]	54.9414	444.359	410.197	484.17	244.323	55.6908		Ce000082Fg55	superoxide dismutase [Carex littledalei]	2.09236	3.36219	3.25731	7.72675	7.81864	3.67594		Ce000051Fg119	AP-5 complex subunit mu isoform X1 [Carex littledalei]	11.8757	10.5319	10.5777	18.2236	17.4326	26.9552
Ce000023Fg58	Nephrocystin-3 [Carex littledalei]	35.4984	31.4691	23.5027	12.1532	11.4343	7.29177		Ce000038Fg86	NAC domain-containing protein 68-like isoform X2 [Carex littledalei]	26.4886	108.327	31.813	6.67607	6.94394	3.90974		Ce000083Fg102	Phosphomannomutase/phosphoglucomutase [Carex littledalei]	30.2053	30.8835	37.0839	69.4047	73.5979	56.0431		Ce000051Fg129	Pentatricopeptide repeat-containing protein, mitochondrial [Ananas comosus]	2.09551	1.1729	1.81027	3.64675	4.49429	6.47677
Ce000023Fg73	arginyl-tRNA synthetase [Carex littledalei]	23.3227	20.7794	17.782	20.1108	11.9305	9.8163		Ce000039Fg139	multiple C2 and transmembrane domain-containing protein 1-like protein [Carex littledalei]	68.5754	122.188	112.28	16.4453	11.0437	2.23844		Ce000083Fg12	ruBisCO large subunit-binding protein subunit alpha [Carex littledalei]	238.065	395.397	536.072	652.058	617.755	499.932		Ce000051Fg135	folate-biopterin transporter 7 [Carex littledalei]	3.25273	2.30156	1.22048	3.17718	6.54992	8.29904
Ce000023Fg90	unnamed protein product [Triticum turgidum subsp. durum]	34.4252	29.0315	29.1593	19.4877	12.8257	6.84633		Ce000039Fg15	hypothetical protein FCM35_KLT05590 [Carex littledalei]	755.001	1106.39	929.351	243.342	196.232	121.45		Ce000083Fg2	1-aminocyclopropane-1-carboxylate oxidase homolog 3-like [Populus alba]	4.75812	4.58096	5.54265	9.91132	11.2134	7.74018		Ce000051Fg18	hypothetical protein GOBAR_AA26823 [Gossypium barbadense]	90.8481	70.0435	77.7887	250.826	321.397	933.623
Ce000023Fg95	E3 ubiquitin-protein ligase HIP1 [Carex littledalei]	24.1931	23.1592	19.6601	8.61247	9.25671	7.40955		Ce000039Fg157	4-coumarate--CoA ligase-like 5 [Carex littledalei]	22.3986	28.2887	23.8024	12.217	8.33339	3.24176		Ce000083Fg64		4.53988	2.59962	1.69853	9.10306	12.2312	5.973		Ce000051Fg45	Glycerol-3-phosphate acyltransferase 9 [Vitis vinifera]	58.0655	45.9767	52.7881	125.31	139.102	149.052
Ce000023Fg97	unnamed protein product [Ananas comosus var. bracteatus]	17.4354	8.68211	8.20233	10.6669	9.96484	6.37598		Ce000039Fg168	mitochondrial arginine transporter BAC2 [Carex littledalei]	19.2666	24.4864	23.0972	7.70955	8.50635	13.1033		Ce000083Fg78	putative folate-biopterin transporter 9 [Carex littledalei]	1.64734	12.7145	20.2353	13.1703	21.4423	14.3665		Ce000051Fg6	Sn1-specific diacylglycerol lipase beta [Carex littledalei]	2.61855	1.7195	3.96998	7.69469	12.3684	54.0627
Ce000024Fg12	hypothetical protein FCM35_KLT19302 [Carex littledalei]	15.7837	15.3548	11.0573	6.10507	7.11334	6.07072		Ce000039Fg18	GTP-binding nuclear protein Ran1B [Vitis vinifera]	101.965	352.043	408.86	29.3874	46.9732	4.52689		Ce000084Fg110	protein YLS9-like protein [Carex littledalei]	40.4364	8.67735	85.9709	133.758	121.166	34.0236		Ce000051Fg61	Hydroxyethylthiazole kinase family protein [Carex littledalei]	2.38412	0.175412	1.17854	2.24692	4.98203	6.70085
Ce000024Fg139	pollen-specific leucine-rich repeat extensin-like protein 2 [Carex littledalei]	23.2172	17.5604	19.7985	10.4439	10.5941	7.58234		Ce000039Fg19	Arylesterase [Carex littledalei]	5.31215	16.4912	8.58302	0.627448	0.35844	0.140665		Ce000084Fg62	protein phosphatase 2C isoform gamma isoform X1 [Carex littledalei]	36.5289	54.8307	61.1632	84.2698	84.0365	34.5899		Ce000051Fg63	Reverse transcriptase-like protein [Carex littledalei]	7.79567	8.63357	5.39775	11.0601	12.1673	18.4469
Ce000024Fg14	Increased DNA methylation 1 [Carex littledalei]	26.5158	14.3129	13.3602	12.967	13.9772	7.81645		Ce000039Fg90	hypothetical protein C4D60_Mb01t01030 [Musa balbisiana]	12.8799	58.3089	65.0371	9.45043	3.85428	0.50223		Ce000085Fg109	putative galactinol--sucrose galactosyltransferase 2 [Carex littledalei]	1.64624	34.7376	31.8182	46.4459	65.6871	42.1999		Ce000052Fg118	(+)-neomenthol dehydrogenase-like isoform X2 [Carex littledalei]	10.382	10.4486	12.5702	19.5116	21.1675	35.7794
Ce000024Fg141	hypothetical protein FCM35_KLT19475 [Carex littledalei]	18.1113	8.89564	8.51297	5.61666	4.49217	2.36351		Ce000039Fg94	alpha-humulene synthase-like protein [Carex littledalei]	35.008	282.014	126.666	2.973	0.164043	0.0504193		Ce000085Fg43	PREDICTED: plasma membrane ATPase 1 isoform X1 [Musa acuminata subsp. malaccensis]	78.8182	74.7063	123.821	325.329	329.613	221.408		Ce000052Fg122	ECP63 protein [Carex littledalei]	1.31701	4.07553	27.3639	1026.16	1379.05	1478.47
Ce000024Fg142	mannosylglycoprotein endo-beta-mannosidase isoform X2 [Carex littledalei]	29.2406	14.2373	14.3894	13.1829	14.5231	23.0898		Ce000039Fg96	Late embryogenesis abundant protein [Carex littledalei]	31.7855	66.8752	33.5426	8.61303	4.57264	1.33037		Ce000085Fg6	bromo adjacent homology domain-containing 1 protein-like isoform X1 [Carex littledalei]	14.7452	12.4844	19.0015	26.4001	32.7269	28.5396		Ce000052Fg128	Protein virilizer [Carex littledalei]	18.3715	9.4617	7.94048	13.9888	10.1136	15.7862
Ce000024Fg165	cyclin-P3-1-like isoform X2 [Carex littledalei]	19.9313	18.4435	12.9342	6.1468	5.87807	3.0846		Ce000039Fg99	hydroxyphenylpyruvate reductase-like protein [Carex littledalei]	31.4385	36.1748	32.5371	17.5797	16.5197	9.82191		Ce000086Fg18		6.91069	9.08462	10.7645	14.9705	6.37921	8.70445		Ce000052Fg14	U3 small nucleolar RNA-associated protein 25 isoform X1 [Carex littledalei]	8.65646	4.88193	6.33782	13.0553	12.868	38.6118
Ce000024Fg18	putative 1-phosphatidylinositol-3-phosphate 5-kinase FAB1D isoform X1 [Carex littledalei]	18.6288	15.2775	9.13552	5.83631	4.31532	5.05889		Ce000040Fg132	low molecular weight [Carex littledalei]	14.1595	18.8254	17.7577	8.98266	5.94099	2.79656		Ce000086Fg75	F-box/LRR-repeat protein 14-like protein [Carex littledalei]	13.5846	16.5973	23.3986	34.1592	23.8827	16.4988		Ce000052Fg20	PREDICTED: uncharacterized protein LOC104590090 isoform X1 [Nelumbo nucifera]	1.86618	0.764788	1.31012	4.47105	7.37007	8.31785
Ce000024Fg26	putative methyltransferase PMT26 [Carex littledalei]	37.5276	36.3796	29.9569	16.7262	13.2461	11.2892		Ce000040Fg15	alcohol dehydrogenase 1B [Carex littledalei]	40.4724	102.321	93.7708	28.0597	16.1113	15.3434		Ce000087Fg76	Heavy-metal-associated domain-containing protein [Carex littledalei]	27.1159	48.3068	85.6529	62.9762	85.3631	23.723		Ce000052Fg31	Upstream activation factor subunit spp27 [Carex littledalei]	18.8749	8.92275	7.5589	18.6414	13.7575	16.7314
Ce000024Fg48	Plant calmodulin-binding domain-containing protein [Carex littledalei]	48.0004	44.0585	30.6164	19.0193	20.1365	14.0995		Ce000040Fg150	hypothetical protein DY000_02041638 [Brassica cretica]	18.7024	59.5693	64.7409	36.3686	37.3449	5.96014		Ce000087Fg79	remorin [Amborella trichopoda]	188.449	116.306	182.321	469.05	366.973	95.0021		Ce000052Fg48	hypothetical protein C4D60_Mb06t01340 [Musa balbisiana]	4.70969	3.11525	3.54635	8.75447	8.27612	18.0789
Ce000024Fg84	mitochondrial fission 1 protein A-like protein [Carex littledalei]	67.6586	50.0914	50.8084	22.9137	24.2798	14.7357		Ce000040Fg40	cell wall / vacuolar inhibitor of fructosidase 2-like protein [Carex littledalei]	1.57662	7.05325	2.46054	0.336802	0	0		Ce000088Fg107	Ribosome maturation factor RimP [Carex littledalei]	2.22078	3.99443	3.81115	5.52181	4.84265	2.71478		Ce000052Fg57	hypothetical protein B456_009G455400 [Gossypium raimondii]	45.4269	32.3624	31.6441	49.3539	64.6206	109.139
Ce000024Fg86	annexin D4 [Carex littledalei]	96.0585	24.5413	29.8696	13.2905	5.55157	1.77184		Ce000040Fg7	adenylate kinase [Carex littledalei]	21.6909	49.0217	53.5523	32.9485	23.8817	18.4487		Ce000088Fg68	Tetratricopeptide repeat protein 33 [Carex littledalei]	1.91292	1.10515	2.96888	6.77001	7.57154	6.35614		Ce000053Fg118		5.79435	2.99552	4.4051	15.2429	13.5985	18.4067
Ce000024Fg87	amidohydrolase YtcJ [Carex littledalei]	17.587	10.5445	8.61577	5.73217	5.74795	3.08416		Ce000041Fg123	aspartokinase 2 [Carex littledalei]	65.7352	171.049	236.28	47.999	24.5233	7.17234		Ce000088Fg80	ACT domain-containing protein ACR3 [Carex littledalei]	6.59509	11.0008	79.6748	171.806	176.259	72.5529		Ce000053Fg23	hypothetical protein FCM35_KLT06279 [Carex littledalei]	12.3894	14.2488	10.2585	32.7619	33.8684	56.0745
Ce000024Fg92	Protein LATERAL ROOT PRIMORDIUM 1 [Carex littledalei]	17.4813	7.62202	4.85343	9.55548	7.93648	1.54179		Ce000041Fg28	PREDICTED: protein SIEVE ELEMENT OCCLUSION B-like [Nelumbo nucifera]	1.33077	13.8406	6.23964	0.402101	0.4439	0.181454		Ce000089Fg32	Protein TRANSPARENT TESTA 12 [Carex littledalei]	16.186	6.24476	19.3496	41.8027	32.9334	27.0777		Ce000053Fg66	polyadenylate-binding protein RBP47-like isoform X1 [Carex littledalei]	37.9991	30.471	33.5333	75.3114	83.4335	156.961
Ce000025Fg109	N-acetyltransferase 9-like protein [Carex littledalei]	24.7898	24.4491	14.3472	13.0225	11.2954	9.53957		Ce000041Fg91	carbonyl reductase [Carex littledalei]	166.862	1319.3	1840.67	500.961	327.586	95.9438		Ce000090Fg103	hypothetical protein FCM35_KLT17652 [Carex littledalei]	14.2081	27.9588	30.8618	40.4221	33.8714	32.2768		Ce000053Fg80		0.17673	0.213469	2.56682	5.92318	13.9487	16.1158
Ce000025Fg116	cytochrome b561 and DOMON domain-containing protein [Carex littledalei]	40.6838	6.01349	6.83572	23.8122	17.7327	10.2504		Ce000042Fg141	LOW QUALITY PROTEIN: filament-like plant protein 7 [Phoenix dactylifera]	43.0614	74.2462	57.5107	31.4647	11.7246	2.4257		Ce000090Fg80	aarF domain-containing protein kinase 1 [Carex littledalei]	1.60788	3.69491	4.4224	13.9427	14.9726	6.36894		Ce000054Fg108	hypothetical protein FCM35_KLT05625 [Carex littledalei]	2.39055	1.14858	1.01314	2.60355	3.7185	6.34405
Ce000025Fg148	Dehydrodolichyl [Carex littledalei]	20.6023	11.5319	9.33387	8.20199	9.31347	4.42095		Ce000042Fg156	protein SPIRAL1-like 1 [Carex littledalei]	61.9603	78.3029	52.0023	53.7507	32.1898	16.8378		Ce000090Fg90	Wound-induced protein [Carex littledalei]	35.0167	67.0988	86.5135	78.7211	113.672	45.7241		Ce000054Fg129	eukaryotic translation initiation factor 3 subunit L-like protein [Carex littledalei]	86.9641	62.31	75.7865	147.786	125.266	227.289
Ce000025Fg15	hypothetical protein FCM35_KLT14503 [Carex littledalei]	26.9665	16.6193	13.0023	14.7545	14.7402	9.16564		Ce000042Fg162	putative arabinose 5-phosphate isomerase [Carex littledalei]	12.615	49.6359	36.9941	1.3979	0.685904	0.310317		Ce000091Fg4	glucose-6-phosphate 1-dehydrogenase 4 [Carex littledalei]	3.74876	4.50345	5.83766	9.3337	11.8644	5.34108		Ce000054Fg20	tRNA (guanine-N(7)-)-methyltransferase-like isoform X1 [Carex littledalei]	5.38001	4.60679	6.05818	16.1754	18.9132	37.1309
Ce000025Fg16	coatomer subunit alpha-1 [Carex littledalei]	127.434	118.178	82.2365	54.6047	52.564	89.7728		Ce000042Fg178	Protein SAR DEFICIENT 1 [Carex littledalei]	3.35382	10.0694	16.7692	5.48675	3.08294	0.499147		Ce000091Fg47	histone-lysine N-methyltransferase EZ2 isoform X5 [Carex littledalei]	9.18492	6.96412	11.5066	23.9514	24.1912	20.3972		Ce000054Fg85	Uncharacterized protein CK203_013270 [Vitis vinifera]	18.9007	4.79576	6.31702	16.8476	14.864	14.5398
Ce000025Fg164	NAC transcription factor 29-like protein [Carex littledalei]	70.688	62.4554	55.6801	40.98	34.5308	21.8247		Ce000042Fg39	putative WRKY transcription factor 53 [Carex littledalei]	13.7089	21.7612	12.8639	9.11284	5.95136	5.02121		Ce000091Fg66	outer envelope pore protein 16-2 [Carex littledalei]	13.953	111.246	421.863	2248.96	2863.04	2020.12		Ce000054Fg86	adenine nucleotide transporter BT1 [Carex littledalei]	37.7469	44.8194	46.8389	70.784	71.2813	110.778
Ce000025Fg19	Autophagy-related protein 3 [Carex littledalei]	116.098	80.962	78.0624	65.5231	55.6314	34.0572		Ce000042Fg44	fatty acid desaturase 2a [Carex littledalei]	35.992	176.61	99.4117	37.2691	11.3321	0.915		Ce000092Fg21	E3 ubiquitin-protein ligase [Carex littledalei]	8.42096	6.11337	8.75008	16.5717	17.0663	11.6643		Ce000054Fg91	BTB/POZ and MATH domain-containing protein 2-like protein [Carex littledalei]	3.39978	2.8106	2.95075	5.83745	5.849	7.57952
Ce000025Fg20	4-coumarate--CoA ligase-like 1 isoform X1 [Carex littledalei]	17.1989	7.7345	4.65298	0.531375	0.229386	0.061294		Ce000042Fg45	golgin candidate 4-like protein [Carex littledalei]	16.3242	18.1883	13.8557	8.19432	7.63259	4.92411		Ce000092Fg30	DNA mismatch repair protein MSH6 [Carex littledalei]	2.84578	2.59477	2.71394	4.81275	5.90132	1.94524		Ce000055Fg106	nephrocystin-3-like protein [Carex littledalei]	3.51807	1.83043	5.38083	19.6879	20.4549	21.632
Ce000025Fg21	Sphingomyelin [Carex littledalei]	14.6324	6.39744	6.71627	7.03628	7.73536	7.68712		Ce000042Fg50	hypothetical protein FCM35_KLT00606 [Carex littledalei]	34.4266	33.6014	32.8834	12.0543	7.41796	5.19985		Ce000093Fg46	1-aminocyclopropane-1-carboxylate oxidase 1-like protein [Carex littledalei]	2.19362	3.37528	9.07308	15.7101	13.9871	10.8843		Ce000055Fg108	unnamed protein product [Digitaria exilis]	9.62483	8.26309	10.0964	15.2657	21.1633	33.825
Ce000025Fg31	homeobox-leucine zipper protein HAT4-like protein [Carex littledalei]	27.8311	8.98163	3.36581	1.78289	0.795751	0.451587		Ce000042Fg62	hypersensitive-induced response protein 1 [Carex littledalei]	56.0722	55.6346	51.1012	26.3523	29.6662	25.8988		Ce000093Fg50	ethylene response factor [Carex littledalei]	293.291	229.353	310.629	375.337	330.233	66.3788		Ce000055Fg121	putative protein S-acyltransferase 15 isoform X2 [Carex littledalei]	16.0299	9.66607	7.83448	10.4988	10.1259	16.3109
Ce000025Fg38	protein ARABIDILLO 1-like protein [Carex littledalei]	24.5119	16.1173	15.3363	14.1226	10.6896	12.5262		Ce000042Fg83	TBC1 domain family member 5 [Carex littledalei]	30.6819	33.3121	26.0461	10.2778	8.55812	4.42016		Ce000093Fg60	hypothetical protein FCM35_KLT16792 [Carex littledalei]	2.76519	6.10406	10.6729	17.5233	16.6405	4.12843		Ce000055Fg133	hypothetical protein FCM35_KLT22034 [Carex littledalei]	19.0344	13.222	18.9918	28.9463	28.1805	38.1975
Ce000025Fg39	palmitoyl-protein thioesterase 1 isoform X2 [Carex littledalei]	38.6064	22.3199	19.3268	11.8246	8.08704	6.47633		Ce000043Fg103	hypothetical protein FCM35_KLT15879 [Carex littledalei]	62.3063	83.208	69.3969	26.1653	26.3583	9.21624		Ce000093Fg86	isoamylase 3 [Carex littledalei]	8.98023	18.5903	37.5584	147.54	114.127	91.1554		Ce000055Fg136	crocetin glucoside glucosyltransferase-like protein [Carex littledalei]	0.0145513	0.203486	1.67231	9.12646	15.3274	29.3198
Ce000025Fg40	DeSI-like protein [Carex littledalei]	23.9384	18.253	10.6379	10.4527	6.83625	4.66106		Ce000043Fg130	common plant regulatory factor 1-like protein [Carex littledalei]	48.9219	119.687	130.849	70.0076	58.4141	32.8855		Ce000094Fg21	hypothetical protein FCM35_KLT12059 [Carex littledalei]	0.154669	0.280585	2.3447	11.6168	16.7859	9.08207		Ce000055Fg140	actin-related protein 2/3 complex subunit 1A-like protein [Carex littledalei]	29.1813	38.8473	39.0733	43.795	51.4769	64.5103
Ce000025Fg45	ethylene-responsive transcription factor 5-like protein [Carex littledalei]	40.8589	12.8145	7.85561	9.56226	18.7413	19.6192		Ce000043Fg131	V-type proton ATPase subunit E [Carex littledalei]	125.44	142.626	117.546	59.1436	58.5539	96.6735		Ce000094Fg25	putative amino-acid acetyltransferase NAGS1 [Carex littledalei]	5.45734	15.1139	72.5281	248.671	160.886	62.597		Ce000055Fg145	pentatricopeptide repeat-containing protein [Carex littledalei]	1.64308	0.996676	2.62481	9.54253	8.6698	11.6202
Ce000025Fg63	poly(rC)-binding protein 3-like protein [Carex littledalei]	24.8258	20.9275	18.9735	16.92	15.0183	10.3999		Ce000043Fg138	jacalin-related lectin 19-like protein [Carex littledalei]	125.035	308.526	377.219	20.0117	29.5026	1.0345		Ce000094Fg37	galactomannan galactosyltransferase 1-like protein [Carex littledalei]	1.28047	1.26345	1.81986	2.69647	6.70708	2.9452		Ce000055Fg149	hypothetical protein ACMD2_15491 [Ananas comosus]	8.78716	4.26781	6.82873	22.2345	30.435	74.2768
Ce000025Fg73	calcineurin B-like protein 1 isoform X2 [Carex littledalei]	27.8037	19.258	12.0157	7.00609	8.11996	6.46994		Ce000043Fg141	hypothetical protein FCM35_KLT15853 [Carex littledalei]	76.3328	123.149	121.574	25.7002	23.1433	12.694		Ce000094Fg39	ruvB-like 2 [Carex littledalei]	32.9555	20.0984	30.6451	68.8046	67.355	62.7973		Ce000055Fg31	PREDICTED: uncharacterized protein LOC100841286 [Brachypodium distachyon]	4.16549	1.81143	4.6113	13.8855	11.0164	20.0207
Ce000025Fg78	eukaryotic translation initiation factor 4G-like isoform X2 [Carex littledalei]	51.1101	28.6478	24.5093	21.6932	18.4365	28.079		Ce000043Fg23	hypothetical protein ACMD2_26294 [Ananas comosus]	187.544	510.239	649.65	181.34	222.412	187.081		Ce000094Fg41	nucleolar GTP-binding protein 1 isoform X2 [Carex littledalei]	5.69223	5.81736	7.57304	20.5351	16.1109	11.317		Ce000055Fg48	uncharacterized protein LOC101777524 [Setaria italica]	5.45811	2.23084	6.32402	18.9236	26.889	36.3541
Ce000025Fg80	beta-amylase 3 [Carex littledalei]	151.081	88.961	64.6264	45.664	55.5096	51.8391		Ce000043Fg4	clathrin interactor EPSIN 1-like protein [Carex littledalei]	43.8775	52.8771	47.3116	30.2772	24.2779	16.5952		Ce000094Fg69	biotin carboxyl carrier protein of acetyl-CoA carboxylase 1 [Carex littledalei]	81.1876	93.1598	174.685	621.973	506.686	257.414		Ce000055Fg49	nuclear/nucleolar GTPase 2 isoform X2 [Ananas comosus]	35.7283	23.4897	26.8857	120.39	92.753	170.856
Ce000025Fg9	Agenet domain-containing protein [Carex littledalei]	96.2771	74.5603	59.6785	55.1142	50.3746	44.226		Ce000043Fg52	Integral membrane protein DUF92 [Carex littledalei]	13.184	30.0044	23.175	15.3546	13.4792	4.28699		Ce000094Fg8	hypothetical protein FCM35_KLT12045 [Carex littledalei]	12.1586	26.9404	59.947	79.2386	40.2758	60.9701		Ce000055Fg51	uncharacterized protein LOC109727209 [Ananas comosus]	7.44338	8.02357	7.92091	16.63	20.8808	19.3992
Ce000025Fg98	unnamed protein product [Digitaria exilis]	28.8985	21.7245	15.3625	14.6592	14.4048	10.4627		Ce000043Fg53	protein TOO MANY MOUTHS [Carex littledalei]	12.9054	27.1943	8.60172	1.90163	1.50708	0.170748		Ce000094Fg91	ninja-family protein 6-like protein [Carex littledalei]	27.5767	37.7137	57.2719	200.296	221.365	170.146		Ce000055Fg52	ABC transporter-like protein [Gossypium australe]	23.6193	18.8816	20.7824	35.0646	36.5856	50.988
Ce000026Fg104	GBP21 GeBP type transcription factor [Carex littledalei]	14.5988	9.20973	7.19162	5.27827	4.83218	4.39852		Ce000043Fg56	SNF1-related protein kinase catalytic subunit alpha KIN10 [Dichanthelium oligosanthes]	34.9964	40.0826	37.2357	27.5375	27.768	10.545		Ce000095Fg111		18.6012	8.03314	10.6836	22.5846	22.0505	18.4283		Ce000055Fg56	hypothetical protein EJB05_38563 [Eragrostis curvula]	0.111787	0.0213293	7.43771	85.8107	94.1685	208.216
Ce000026Fg128	callose synthase 10 [Carex littledalei]	34.7119	37.8277	25.7724	20.9175	13.0018	14.6882		Ce000043Fg72	protochlorophyllide reductase-like protein [Carex littledalei]	3.33118	20.7081	6.76226	0.144204	0.005438	0.00505333		Ce000095Fg113	pyruvate kinase isozyme G [Carex littledalei]	61.4929	42.3991	41.6978	148.162	125.938	64.1246		Ce000055Fg72	Superoxide dismutase [Cu-Zn], chloroplastic [Dendrobium catenatum]	12.9904	11.609	12.747	24.9435	22.6183	26.6106
Ce000026Fg136	unnamed protein product [Brassica oleracea]	34.036	27.8851	23.6947	17.2592	13.6923	12.7334		Ce000043Fg93	respiratory burst oxidase protein B [Carex littledalei]	27.7013	29.4623	24.3761	21.7351	10.3394	6.88163		Ce000095Fg117	tetraspanin family protein [Carex littledalei]	33.3046	41.2648	50.0488	90.7964	92.267	80.6012		Ce000055Fg78	PREDICTED: uncharacterized protein LOC103319459 [Prunus mume]	0.818879	0.619794	2.02461	14.9185	42.1639	60.2363
Ce000026Fg142	transcription factor HBP-1a-like isoform X1 [Carex littledalei]	13.9141	11.8479	7.27427	7.61614	5.7302	5.11322		Ce000043Fg95	Anthocyanidin [Carex littledalei]	9.67655	55.5468	30.8989	4.20025	3.9652	6.77116		Ce000095Fg120	hypothetical protein FCM35_KLT20546 [Carex littledalei]	10.5524	14.2484	16.3668	27.3621	20.914	25.2187		Ce000055Fg79	signal recognition particle protein [Carex littledalei]	8.53242	10.2935	12.0661	24.3798	20.0668	24.2708
Ce000026Fg147	NADPH producing dehydrogenase of the oxidative pentose phosphate pathway [Carex littledalei]	125.576	99.3164	74.0543	28.337	20.3179	9.70418		Ce000043Fg96	Anthocyanidin [Carex littledalei]	6.45483	43.3655	33.5146	0.14934	0.143838	0.203718		Ce000095Fg60	hypothetical protein FCM35_KLT20492 [Carex littledalei]	49.6444	176.318	364.401	678.438	608.531	156.165		Ce000055Fg91	hypothetical protein HYC85_013279 [Camellia sinensis]	46.4128	18.2145	20.7977	36.7129	31.0267	69.5885
Ce000026Fg148	extra-large guanine nucleotide-binding protein 3-like protein [Carex littledalei]	17.0591	15.5567	11.3583	6.72612	6.37976	5.21666		Ce000043Fg98	anthocyanidin 5,3-O-glucosyltransferase-like protein [Carex littledalei]	24.3625	51.913	64.4008	3.26161	4.15161	5.41062		Ce000095Fg61	hypothetical protein FCM35_KLT20493 [Carex littledalei]	171.787	464.194	841.065	894.237	889.804	369.065		Ce000056Fg35	hypothetical protein C3L33_03617, partial [Rhododendron williamsianum]	16.0557	48.1515	111.864	252.338	226.775	305.286
Ce000026Fg155	hypothetical protein FCM35_KLT13645 [Carex littledalei]	21.3475	12.8674	14.2007	16.59	18.1632	9.48412		Ce000044Fg110	allene oxide synthase 1 [Carex littledalei]	340.102	577.248	348.81	91.7921	60.8099	23.9489		Ce000095Fg77	Nuclease-related domain-containing protein [Carex littledalei]	28.2599	28.2971	31.4728	69.309	59.8802	39.0623		Ce000056Fg46		5.48266	2.57759	2.43808	9.62161	11.7783	16.402
Ce000026Fg159	hypothetical protein FCM35_KLT10874 [Carex littledalei]	69.4248	55.9714	52.6323	26.6323	26.1159	18.4079		Ce000044Fg114		47.9343	176.366	394.808	117.782	161.342	50.4543		Ce000096Fg6	1-aminocyclopropane-1-carboxylate oxidase 1-like protein [Carex littledalei]	2.09689	3.30669	8.28354	12.4833	12.5002	8.39626		Ce000056Fg47		4.15861	3.22842	5.15351	9.96232	12.4972	16.7811
Ce000026Fg171	UDP-glycosyltransferase 73B1 [Carex littledalei]	39.0066	16.0691	7.29946	3.58138	4.03084	2.03694		Ce000044Fg115	hypothetical protein FCM35_KLT11441 [Carex littledalei]	119.554	117.095	301.786	182.712	139.258	36.4402		Ce000097Fg27	Pentatricopeptide repeat-containing protein [Apostasia shenzhenica]	0.746203	1.75605	2.19449	9.91925	11.8841	4.23477		Ce000057Fg3	hypothetical protein BHE74_00033780 [Ensete ventricosum]	9.74312	10.9392	56.1466	20.7048	22.1886	88.47
Ce000026Fg207	2,3-bisphosphoglycerate-dependent [Carex littledalei]	13.6581	12.126	12.3597	10.5774	10.2033	6.06001		Ce000044Fg123	hypothetical protein MIMGU_mgv1a014308mg [Erythranthe guttata]	594.575	873.947	1701.63	536.177	269.081	303.285		Ce000097Fg36	E3 ubiquitin-protein ligase [Carex littledalei]	16.951	14.2537	22.351	34.5028	38.9073	24.3897		Ce000057Fg48	Protein FAF-like [Carex littledalei]	2.77012	1.09157	0.493103	2.25604	3.738	27.0978
Ce000026Fg46	Coatomer (COPI) alpha subunit C-terminus [Carex littledalei]	35.837	38.3481	23.2371	13.1705	8.99383	10.2943		Ce000044Fg129	hypothetical protein FCM35_KLT11453 [Carex littledalei]	20.1666	21.5727	20.9229	9.56497	10.8314	8.44088		Ce000098Fg25	10-deacetylbaccatin III 10-O-acetyltransferase [Carex littledalei]	36.1034	15.9672	49.9285	171.027	267.901	130.338		Ce000057Fg56	hypothetical protein FCM35_KLT14007 [Carex littledalei]	2.92166	0.503666	1.70738	10.5064	15.6754	13.7809
Ce000026Fg51	hypothetical protein C5167_046837 [Papaver somniferum]	17.6902	10.7166	7.46611	16.9948	9.95377	11.7558		Ce000044Fg146	zinc finger protein ZAT10-like protein [Carex littledalei]	325.112	424.732	322.927	67.5526	44.7182	37.4301		Ce000098Fg30	Switch 2 [Carex littledalei]	3.18585	2.6119	3.23354	6.94696	6.5491	4.19574		Ce000057Fg74	hypothetical protein GIB67_001619 [Kingdonia uniflora]	16.1873	12.9452	14.1429	24.1343	22.8968	38.5177
Ce000026Fg58	hypothetical protein FCM35_KLT10909 [Carex littledalei]	24.3256	11.4164	13.1092	11.8092	13.2308	12.625		Ce000044Fg149	Casein kinase II subunit alpha [Carex littledalei]	32.1946	35.2749	31.4389	20.3668	19.4124	15.4688		Ce000099Fg1	dicarboxylate transport 2.1 [Carex littledalei]	0.276338	0.135979	0.421901	4.68837	7.6628	1.03912		Ce000057Fg90	nucleolar protein 10 [Carex littledalei]	12.1993	6.57138	10.5125	51.0688	58.2999	177.755
Ce000026Fg67	hypothetical protein C2845_PM01G34310 [Panicum miliaceum]	66.7164	48.988	51.5239	32.2016	30.5908	21.8066		Ce000044Fg28	E3 ubiquitin ligase SUD1 [Carex littledalei]	7.68134	27.0056	32.2946	17.622	15.9791	13.705		Ce000100Fg83	tetraspanin family protein [Carex littledalei]	33.3478	39.4761	51.6758	87.915	86.4437	58.1306		Ce000058Fg15	pre-mRNA-splicing factor syf2 [Carex littledalei]	20.9499	19.3451	25.6164	46.7033	59.3083	102.037
Ce000026Fg85	conserved oligomeric Golgi complex subunit 7 [Carex littledalei]	31.3497	25.7971	18.5016	14.0351	16.4053	15.9455		Ce000044Fg43	unnamed protein product [Digitaria exilis]	5.6982	12.198	14.0847	9.2699	8.24437	3.27378		Ce000100Fg87	pyruvate kinase isozyme G [Carex littledalei]	59.6728	35.7534	34.1892	164.532	167.739	116.555		Ce000058Fg155	hypothetical protein FCM35_KLT10893 [Carex littledalei]	6.67638	4.38744	3.35683	10.8382	11.666	16.2395
Ce000026Fg86	hypothetical protein E2562_025679 [Oryza meyeriana var. granulata]	40.1818	30.2538	31.9849	20.0402	19.4861	12.8351		Ce000044Fg49	soluble inorganic pyrophosphatase 1 [Carex littledalei]	21.6718	50.2675	49.5225	40.3846	28.5169	16.5996		Ce000101Fg48	hypothetical protein FCM35_KLT10801 [Carex littledalei]	168.676	79.3319	127.041	178.247	238.94	144.37		Ce000058Fg37	ruBisCO large subunit-binding protein subunit beta [Carex littledalei]	112.372	158.845	176.666	240.863	252.819	259.505
Ce000026Fg9	hypothetical protein FCM35_KLT10863 [Carex littledalei]	18.4198	14.9196	18.5629	21.0738	15.5963	7.23067		Ce000044Fg68	homeobox protein rough sheath 1-like protein [Carex littledalei]	22.232	21.122	27.2815	22.9185	27.0898	9.56884		Ce000101Fg91	transcription factor RAX1-like protein [Carex littledalei]	3.13109	3.0247	1.66815	5.88643	6.45157	2.22371		Ce000058Fg40	SMG9-like protein [Zea mays]	8.04764	6.78695	7.04643	13.2383	12.7378	21.5286
Ce000026Fg94	BAG family molecular chaperone regulator 7-like protein [Carex littledalei]	245.588	249.709	178.219	57.9534	45.3464	28.2367		Ce000044Fg74	putative xyloglucan glycosyltransferase 9 [Carex littledalei]	32.0683	95.1709	76.7177	26.8	23.5837	6.51086		Ce000102Fg19	hypothetical protein C4D60_Mb01t08880 [Musa balbisiana]	3.04893	11.9579	14.2957	21.6268	14.0951	0.0277793		Ce000058Fg48	DnaJ subfamily C member 16 [Carex littledalei]	3.53113	2.07795	2.12681	3.89271	6.13186	7.85484
Ce000026Fg96	putative CjMDR1 [Carex littledalei]	97.1928	41.4049	28.5808	20.0548	14.8659	2.0217		Ce000044Fg80	hypothetical protein FCM35_KLT11406 [Carex littledalei]	49.7118	59.1849	71.5784	22.9117	20.5063	7.36958		Ce000102Fg28	GDSL esterase/lipase [Carex littledalei]	5.7565	2.22824	68.5769	102.16	122.102	12.7425		Ce000058Fg5	F-box protein SKIP31-like isoform X3 [Phoenix dactylifera]	56.5319	31.8957	33.7683	91.115	103.503	261.506
Ce000026Fg97	putative L-cysteine desulfhydrase 1 [Carex littledalei]	19.8653	14.3266	17.014	19.8953	18.2296	9.48984		Ce000045Fg13	protein UPSTREAM OF FLC-like protein [Carex littledalei]	15.304	39.8354	27.4166	14.0834	9.35296	1.98502		Ce000102Fg9	PHD finger protein ALFIN-LIKE 8 [Ananas comosus]	2.59752	1.05771	1.16057	5.77999	5.53115	3.13357		Ce000058Fg68	late embryogenesis abundant protein D-113 [Carex littledalei]	0.823487	2.39149	21.9629	69.65	92.3162	281.881
Ce000027Fg10	hypothetical protein FCM35_KLT12381 [Carex littledalei]	69.0277	19.5576	14.8666	10.8739	20.3287	15.8752		Ce000045Fg154	isoflavone 2'-hydroxylase-like protein [Carex littledalei]	21.7953	24.8151	25.207	11.631	8.09588	2.79665		Ce000103Fg28	flavin-containing monooxygenase FMO GS-OX5-like [Dendrobium catenatum]	4.65193	0.391654	2.28341	10.6005	2.45439	0.565694		Ce000058Fg88	Retrovirus-related Pol polyprotein LINE-1 [Zea mays]	117.45	21.9751	39.0509	127.899	113.553	210.332
Ce000027Fg112	putative ATP/GTP binding protein [Carex littledalei]	40.0271	24.8217	28.0665	14.9562	18.3312	21.8172		Ce000045Fg160		78.3011	209.835	121.021	2.04548	0.338124	0.176986		Ce000103Fg43	14 kDa proline-rich protein DC2.15-like [Nicotiana tomentosiformis]	127.063	105.911	381.959	427.596	227.843	8.74678		Ce000059Fg1	PREDICTED: chaperone protein dnaJ A6, chloroplastic-like [Musa acuminata subsp. malaccensis]	31.1911	38.3326	55.9054	117.62	125.863	162.071
Ce000027Fg115	protein YLS9-like protein [Carex littledalei]	39.9394	10.8405	3.27527	0.0388383	0.3466	0.180705		Ce000045Fg25	E3 ubiquitin-protein ligase RING1-like protein [Carex littledalei]	74.1488	147.939	102.404	25.1784	21.0105	11.7791		Ce000103Fg44	pEARLI1-like lipid transfer protein 2 [Carex littledalei]	161.916	194.911	280.634	1350.34	884.517	396.215		Ce000059Fg30	peptidyl-prolyl cis-trans isomerase CYP59 isoform X1 [Carex littledalei]	11.8944	8.60617	9.61748	14.7553	13.3874	23.8686
Ce000027Fg130	putative metal-nicotianamine transporter YSL6 isoform X1 [Carex littledalei]	26.6156	16.9804	13.0465	4.38945	2.81717	1.11752		Ce000045Fg37	putative methyltransferase PMT11 isoform X1 [Carex littledalei]	17.3943	36.3845	28.4919	6.66313	4.31762	2.47668		Ce000104Fg126	PREDICTED: N-(5'-phosphoribosyl)anthranilate isomerase 1, chloroplastic [Musa acuminata subsp. malaccensis]	28.0715	28.5439	35.2251	68.8492	56.9003	62.6178		Ce000059Fg36	Eukaryotic translation initiation factor 1A [Capsicum annuum]	30.3553	22.4559	26.3667	64.5797	84.8463	171.724
Ce000027Fg14	NAD(P)-binding Rossmann-fold superfamily protein [Artemisia annua]	25.5214	15.8514	14.26	9.88636	8.47781	5.6408		Ce000045Fg39	PRA1 family protein A1 [Carex littledalei]	45.5166	50.7766	51.5208	33.8153	28.0254	21.4198		Ce000104Fg84	putative lactoylglutathione lyase, chloroplast [Carex littledalei]	12.3496	38.11	40.9498	35.0897	33.7563	23.1565		Ce000060Fg135	Protein PLASTID TRANSCRIPTIONALLY ACTIVE 12 [Carex littledalei]	2.84401	2.93101	3.20489	10.5629	11.9112	11.4164
Ce000027Fg2	gamma carbonic anhydrase-like 2 [Carex littledalei]	18.0448	11.2151	8.28497	6.36857	6.30928	3.51563		Ce000045Fg40	FAD-linked sulfhydryl oxidase ERV1 isoform X2 [Ananas comosus]	7.45665	11.929	27.0348	15.62	13.513	5.28663		Ce000104Fg94	putative plastidic glucose transporter 2 [Carex littledalei]	26.9117	43.2193	52.3277	57.9238	61.5622	38.0788		Ce000060Fg65	hypothetical protein FCM35_KLT07617 [Carex littledalei]	2.28116	0.681814	1.51145	3.57655	5.18104	20.4518
Ce000027Fg22	SWI/SNF complex component SNF12 [Carex littledalei]	33.9133	25.367	25.2659	16.8201	14.7886	8.16637		Ce000045Fg42	ras-related protein Rab2BV [Carex littledalei]	87.5885	97.8476	62.7236	12.009	8.91463	9.30462		Ce000106Fg36	queuine tRNA-ribosyltransferase subunit QTRTD1-like isoform X1 [Carex littledalei]	3.65902	3.74968	4.83031	9.03056	6.81487	6.26742		Ce000060Fg93	hypothetical protein Zm00014a_013764 [Zea mays]	2.91586	1.00547	1.88502	3.86593	7.10095	21.9876
Ce000027Fg31	polygalacturonase [Carex littledalei]	44.4515	31.0707	19.8463	18.8532	8.89445	7.69622		Ce000045Fg62	scarecrow-like protein 21 [Carex littledalei]	405.31	578.992	451.159	131.899	123.048	92.1724		Ce000106Fg52_Ce000106Fg53	hypothetical protein FCM35_KLT17899 [Carex littledalei]	5.76212	5.08615	7.06042	27.6617	28.0225	9.2288		Ce000061Fg104	Tim17/Tim22/Tim23/Pmp24 family [Carex littledalei]	7.99636	4.67518	6.22004	8.88216	12.1366	16.8003
Ce000027Fg33	WD repeat-containing protein WRAP73 [Carex littledalei]	20.6468	7.63102	3.84581	4.09552	6.4313	3.81468		Ce000045Fg77	isoaspartyl peptidase/L-asparaginase isoform X2 [Carex littledalei]	9.6493	186.137	141.779	31.0515	17.2873	5.44644		Ce000106Fg79	Protein NDH-DEPENDENT CYCLIC ELECTRON FLOW 5 [Carex littledalei]	5.96793	2.32124	7.77411	51.9116	36.4068	42.5313		Ce000061Fg116	hypothetical protein GOBAR_AA11501 [Gossypium barbadense]	43.1074	32.3775	32.7618	49.7706	60.0843	98.9986
Ce000027Fg36	putative lipase class 3 family protein [Carex littledalei]	27.9513	14.8353	8.52734	4.86112	2.84631	0.704284		Ce000045Fg83	DSBA-like thioredoxin domain-containing protein [Carex littledalei]	46.6819	68.1884	30.9754	13.3142	9.83296	7.01997		Ce000107Fg16	F-box protein AFR [Carex littledalei]	17.216	23.4817	52.9511	107.05	140.948	34.4083		Ce000061Fg123	methyltransferase-like protein 13 isoform X1 [Carex littledalei]	32.7922	23.6053	30.5336	93.3595	89.3381	160.804
Ce000027Fg47	putative UDP-arabinopyranose mutase 2 [Carex littledalei]	120.658	77.7636	45.3618	16.161	18.6319	5.90258		Ce000045Fg87	hypothetical protein BHE74_00012826 [Ensete ventricosum]	723.031	1364.53	450.661	31.6051	21.3192	10.192		Ce000107Fg2	homogentisate phytyltransferase [Carex littledalei]	3.18132	12.7865	39.1928	54.258	46.8343	2.09755		Ce000061Fg30	DDT domain-containing protein [Carex littledalei]	4.77413	2.10641	3.88682	11.845	9.3438	12.5268
Ce000027Fg54	PTI1-like tyrosine-protein kinase 1 [Cinnamomum micranthum f. kanehirae]	29.674	26.2982	21.3314	9.10161	6.61255	3.12561		Ce000045Fg93	NADH-ubiquinone reductase complex 1 MLRQ subunit [Carex littledalei]	44.0891	196.012	258.334	18.0373	6.69928	1.0987		Ce000107Fg39	Transcription termination factor 3 [Carex littledalei]	5.56696	5.98309	7.84323	14.0435	15.1226	9.50254		Ce000061Fg32	CDK-activating kinase assembly factor MAT1 [Carex littledalei]	7.39196	5.45808	5.25562	12.1199	14.6522	21.1349
Ce000027Fg76		73.226	16.4377	25.8416	8.96706	5.14522	1.0754		Ce000045Fg94	cytochrome P450 85A1-like protein [Carex littledalei]	20.43	45.9796	17.117	5.91247	1.90999	0.144359		Ce000107Fg43	sterol 3-beta-glucosyltransferase UGT80B1 [Carex littledalei]	19.0474	28.8997	26.6595	78.2231	59.9333	45.6128		Ce000061Fg61	hypothetical protein FCM35_KLT12457 [Carex littledalei]	10.206	5.82984	7.35712	16.7133	19.4978	31.0693
Ce000027Fg83	hypothetical protein FCM35_KLT09485 [Carex littledalei]	21.6335	14.1247	7.15907	3.1684	3.88844	9.06127		Ce000046Fg5	Uridine kinase-like protein 3 [Carex littledalei]	46.7795	69.5513	54.0111	46.4131	30.6486	22.3896		Ce000107Fg57	hypothetical protein B296_00046443 [Ensete ventricosum]	101.306	179.49	196.725	427.927	391.643	165.037		Ce000062Fg111	--	0.714084	2.63974	15.2559	62.7192	151.452	148.007
Ce000028Fg105	hypothetical protein B296_00013859 [Ensete ventricosum]	303.059	131.819	142.082	175.832	206.731	180.107		Ce000046Fg50	hypothetical protein F2Q69_00005297 [Brassica cretica]	42.5459	66.8794	32.1113	13.2467	9.02414	5.4488		Ce000107Fg65	Filament-like plant protein 3 [Carex littledalei]	12.9037	29.4327	39.5325	65.3708	63.2914	17.124		Ce000062Fg114	3-oxoacyl-[acyl-carrier-protein] reductase [Carex littledalei]	6.95762	5.49289	5.67975	10.1298	9.0422	17.1523
Ce000028Fg110	protein TIC 55, chloroplastic [Elaeis guineensis]	45.0301	43.6505	34.2268	21.3371	18.847	8.65207		Ce000046Fg51	Transaldolase [Carex littledalei]	157.039	229.9	261.874	234.567	146.353	66.8701		Ce000107Fg66	serine/threonine-protein kinase SRK2A-like isoform X1 [Quercus suber]	36.6741	49.6771	91.313	78.3838	102.087	72.2914		Ce000062Fg128	lysine-specific demethylase 8 isoform X1 [Carex littledalei]	17.2996	18.8836	34.1842	40.6343	32.012	44.0975
Ce000028Fg125_Ce000028Fg126	PREDICTED: serine carboxypeptidase II-2 [Musa acuminata subsp. malaccensis]	55.9798	45.9113	21.3005	4.06824	2.34424	1.19019		Ce000046Fg79	mitochondrial import inner membrane translocase subunit TIM22 [Carex littledalei]	14.3645	39.7345	26.3336	8.68943	8.7059	6.24314		Ce000108Fg102	primary amine oxidase-like protein [Carex littledalei]	39.8245	34.6199	54.1201	73.6825	81.6771	16.9708		Ce000062Fg19	uncharacterized protein LOC109727328 [Ananas comosus]	42.1215	39.9579	41.0613	65.669	65.5462	90.7332
Ce000028Fg147	putative CCR4-associated factor 1 -like protein 7 [Capsicum annuum]	17.2523	15.4319	15.6243	14.3445	13.4346	8.15624		Ce000047Fg5	LOB domain-containing protein 40-like protein [Carex littledalei]	86.405	319.327	337.659	195.611	235.068	62.0438		Ce000108Fg51		0.335146	2.51674	7.79228	10.9414	11.7278	12.5672		Ce000062Fg20	Rho termination factor [Carex littledalei]	3.63193	2.98118	2.6632	7.60178	6.22349	7.69713
Ce000028Fg148	CHD3-type chromatin-remodeling factor PICKLE-like [Ananas comosus]	25.1186	18.2737	16.0522	14.7804	11.407	12.102		Ce000047Fg65	hypothetical protein FCM35_KLT05957 [Carex littledalei]	15.7591	21.4802	17.6108	8.15899	7.43593	9.92715		Ce000109Fg68	hypothetical protein FCM35_KLT06349 [Carex littledalei]	3.42054	1.28904	3.61418	14.0525	10.2003	2.32984		Ce000062Fg42	Phospho-2-dehydro-3-deoxyheptonate aldolase 1, chloroplastic [Ananas comosus]	74.1848	110.367	89.1583	129.67	142.639	240.018
Ce000028Fg153	Polyadenylate-binding protein 2 [Spatholobus suberectus]	58.3104	30.9098	28.518	35.8996	35.5439	48.3569		Ce000047Fg68	L-Ala-D/L-amino acid epimerase isoform X1 [Carex littledalei]	45.3696	62.5247	53.5018	11.707	5.95984	2.40102		Ce000109Fg76	50S ribosomal protein L29 [Carex littledalei]	6.50579	12.6515	13.3188	27.4897	30.0976	28.8634		Ce000062Fg48	lanC-like protein GCL1 [Papaver somniferum]	2.83529	23.8797	37.0858	15.3915	31.2343	33.841
Ce000028Fg20	hypothetical protein HYC85_027911 [Camellia sinensis]	36.661	6.39626	9.44571	3.89197	2.85913	2.2074		Ce000048Fg32	fasciclin-like arabinogalactan protein 1 [Carex littledalei]	57.2026	67.4263	51.7176	12.3338	6.88808	0.585204		Ce000110Fg38	Retrovirus-related Pol polyprotein from transposon TNT 1-94 [Glycine soja]	6.91331	11.0108	10.9812	14.7595	12.991	10.9647		Ce000062Fg60	zinc finger MYM-type protein 1-like [Quercus lobata]	1.26786	0.542145	1.15803	6.05507	8.58717	20.5602
Ce000028Fg21	PREDICTED: polyadenylate-binding protein-interacting protein 7-like isoform X1 [Musa acuminata subsp. malaccensis]	108.503	80.9632	71.2217	52.7842	43.2261	35.9505		Ce000048Fg73	acyl-[acyl-carrier-protein] desaturase 1 [Carex littledalei]	172.361	419.618	637.979	240.067	130.707	17.2641		Ce000110Fg45	ultraviolet-B receptor UVR8 [Carex littledalei]	3.63231	3.70542	5.87094	7.64999	6.88788	4.10796		Ce000062Fg68	protein Iojap [Carex littledalei]	6.83957	5.00979	3.82606	15.8954	14.3908	29.5333
Ce000028Fg24	putative inactive leucine-rich repeat receptor-like protein kinase [Hordeum vulgare]	12.9126	7.53099	6.01063	8.44285	8.62284	5.45513		Ce000049Fg49	Retrovirus-related Pol polyprotein LINE-1 [Zea mays]	13.5865	26.4079	15.3534	6.55187	6.80095	5.73691		Ce000110Fg61	ACT-like protein tyrosine kinase family protein [Carex littledalei]	18.0584	16.6825	33.936	39.1065	27.1632	17.4102		Ce000062Fg89	hypothetical protein FCM35_KLT04604 [Carex littledalei]	16.5467	7.56398	9.27841	20.5201	31.9577	53.0277
Ce000028Fg29	auxin response factor 16 isoform X1 [Oryza sativa Japonica Group]	30.4559	10.265	7.87562	7.8878	3.70739	3.67954		Ce000049Fg9	PREDICTED: V-type proton ATPase subunit B 1 isoform X1 [Gossypium raimondii]	88.3204	100.568	87.0507	36.3268	36.1009	24.8812		Ce000110Fg80	serine/threonine-protein phosphatase 7 long form [Carex littledalei]	8.58411	7.23272	7.30428	17.5258	14.9069	13.1113		Ce000062Fg94	splicing factor U2af small subunit B-like isoform X2 [Carex littledalei]	26.9443	17.267	45.5301	19.877	31.5801	68.35
Ce000028Fg36	hypothetical protein F2Q69_00038436 [Brassica cretica]	52.2913	34.013	24.0885	14.2006	12.3972	8.90188		Ce000049Fg96	PREDICTED: beta-adaptin-like protein B isoform X1 [Capsicum annuum]	92.1156	102.929	75.1958	36.7143	31.2232	39.3236		Ce000111Fg34	monothiol glutaredoxin-S12 [Carex littledalei]	3.4092	5.9594	9.19082	13.2393	10.8986	9.11583		Ce000063Fg105	KRR1 small subunit processome component [Carex littledalei]	35.9735	24.5312	31.5191	80.4483	93.1753	130.103
Ce000028Fg63	hypothetical protein DKX38_003004 [Salix brachista]	24.8667	19.944	16.2745	15.9405	13.0542	8.55602		Ce000050Fg128	cysteine-rich receptor-like protein kinase 10 isoform X1 [Carex littledalei]	43.5032	65.1534	61.6704	21.7971	13.5067	3.28069		Ce000111Fg35	monothiol glutaredoxin-S12 [Carex littledalei]	14.7968	15.8934	20.4105	38.5048	38.4612	13.583		Ce000063Fg110	delta-1-pyrroline-5-carboxylate dehydrogenase 12A1 [Carex littledalei]	28.3429	21.1302	23.7611	65.541	95.0019	107.132
Ce000028Fg71	uncharacterized protein LOC110811051 isoform X2 [Carica papaya]	14.7107	7.71548	11.9449	9.52715	5.83478	7.02451		Ce000050Fg43	protein vip1-like protein [Carex littledalei]	77.9023	104.192	133.9	44.5406	31.5502	14.3542		Ce000111Fg42	Chaperone protein ClpB1 [Carex littledalei]	7.84067	10.9452	12.7248	14.5068	17.9943	8.4499		Ce000063Fg14	hypothetical protein FCM35_KLT06906 [Carex littledalei]	6.89072	6.58494	11.8667	17.5816	20.5109	41.1349
Ce000028Fg73	mitogen-activated protein kinase kinase 5 [Sorghum bicolor]	19.9483	7.58832	12.3182	7.57206	8.45084	6.71556		Ce000050Fg60	glutamyl-tRNA(Gln) amidotransferase subunit A [Carex littledalei]	4.10293	10.0229	9.47077	7.50452	5.46422	5.65325		Ce000112Fg16	putative peptidoglycan binding domain-containing protein [Carex littledalei]	2.33234	4.877	6.41374	8.40355	6.35561	5.27995		Ce000063Fg26	--	3.26942	6.90899	163.786	1690.59	2060.63	1907.37
Ce000028Fg76	hypothetical protein C5167_032820 [Papaver somniferum]	42.7408	39.5692	37.2468	34.2128	25.3956	17.9563		Ce000050Fg62	coatomer subunit delta-2-like protein [Carex littledalei]	65.9394	69.6571	59.8442	27.2852	23.9382	13.2334		Ce000112Fg43	peroxygenase-like protein [Carex littledalei]	8.13494	3.66619	59.4877	30.3029	54.5182	16.1042		Ce000063Fg27	Protein PLASTID TRANSCRIPTIONALLY ACTIVE 7 [Carex littledalei]	3.80651	2.88363	4.04256	6.9349	9.50975	19.1914
Ce000028Fg91	protein transport protein Sec61 subunit gamma isoform X1 [Abrus precatorius]	53.1925	49.3886	39.718	28.2921	24.2033	16.7629		Ce000050Fg9	nuclear transcription factor Y subunit B-11 [Zea mays]	6.84625	30.8957	15.6019	2.21452	1.22662	0.25122		Ce000112Fg90	nuclear cap-binding protein subunit 1-like protein [Carex littledalei]	2.08133	0.910797	1.93629	5.97925	6.59717	5.3401		Ce000063Fg37	hypothetical protein OsJ_03184 [Oryza sativa Japonica Group]	2.39696	1.62367	1.68021	4.09044	5.50592	6.38441
Ce000029Fg131	uncharacterized protein LOC103712069 [Phoenix dactylifera]	43.4146	35.2533	26.261	13.0202	9.40272	6.53142		Ce000050Fg91	E3 ubiquitin-protein ligase MARCH11 [Carex littledalei]	65.4	81.4793	71.7018	37.0162	26.133	12.6313		Ce000113Fg11	gibberellin 20 oxidase 2 [Carex littledalei]	3.05605	11.763	30.0334	42.5368	26.1203	3.04865		Ce000064Fg11	DEAD-box ATP-dependent RNA helicase 53-like isoform X2 [Carex littledalei]	29.5251	10.0912	13.7461	36.2701	39.9466	39.8312
Ce000029Fg149	conserved oligomeric Golgi complex subunit 1-like protein [Carex littledalei]	18.737	14.8454	10.8005	7.70749	7.25794	5.80818		Ce000051Fg116	protein FANTASTIC FOUR 2-like [Elaeis guineensis]	35.109	130.082	88.1833	21.6466	28.3122	13.259		Ce000113Fg16	protein FAR1-RELATED SEQUENCE 1-like [Aegilops tauschii subsp. tauschii]	11.4649	14.9387	23.7784	19.729	15.1207	13.6672		Ce000064Fg135	Aspartic proteinase oryzasin-1 [Carex littledalei]	10.6562	7.23689	9.70443	23.8078	23.2377	28.2857
Ce000029Fg153	WD repeat-containing protein 13 isoform X1 [Carex littledalei]	14.7766	12.6773	11.7651	9.70314	7.38669	5.37107		Ce000051Fg118	Glutathione synthetase [Carex littledalei]	22.8076	36.7394	32.2515	14.9482	9.64714	5.7098		Ce000113Fg29	Stem-specific protein TSJT1 [Carex littledalei]	294.209	460.746	671.402	1113.08	675.74	368.123		Ce000064Fg28	alpha N-terminal protein methyltransferase 1 [Carex littledalei]	40.9739	18.2652	21.2451	53.2861	41.5733	70.3252
Ce000029Fg178	Signal recognition particle protein 1 [Carex littledalei]	51.3481	46.5464	45.1046	39.8083	33.9955	15.4919		Ce000051Fg137	protein NUCLEAR FUSION DEFECTIVE 4-like protein [Carex littledalei]	0.960837	19.4779	38.6424	2.61117	2.40896	0.29948		Ce000115Fg71	hypothetical protein C4D60_Mb06t12440 [Musa balbisiana]	18.0984	8.63607	8.23091	14.2386	16.4829	12.2978		Ce000064Fg54	S-adenosyl-L-methionine-dependent tRNA 4-demethylwyosine synthase-like isoform X2 [Carex littledalei]	12.4037	5.39067	7.97818	23.7482	21.679	29.8039
Ce000029Fg189	coenzyme Q-binding protein COQ10 [Carex littledalei]	14.0169	9.69633	7.15797	5.63453	6.63228	4.87855		Ce000051Fg141	hypothetical protein FCM35_KLT20415 [Carex littledalei]	10.5763	21.31	18.5188	16.1229	13.7649	7.86152		Ce000116Fg8	chalcone synthase [Lactuca sativa]	0.136984	0.245354	39.0375	114.023	47.0657	15.1427		Ce000064Fg80	gamma-tocopherol methyltransferase [Carex littledalei]	10.1613	49.2538	45.5014	68.4502	51.6005	103.741
Ce000029Fg19	deSI-like protein At4g17486 isoform X1 [Ananas comosus]	20.6668	17.8415	10.6973	8.64566	8.02511	6.31382		Ce000051Fg143	Putative leucine-rich repeat receptor-like protein kinase family protein [Zea mays]	21.309	33.5541	23.7819	8.1081	6.61676	3.47629		Ce000117Fg13	transcription factor bHLH113-like isoform X1 [Carex littledalei]	3.69359	6.69932	5.7614	6.88756	8.26621	0.519667		Ce000064Fg81	PREDICTED: DNA polymerase delta catalytic subunit [Musa acuminata subsp. malaccensis]	10.5534	7.43953	10.1669	16.7638	22.3236	57.636
Ce000029Fg191	25.3 kDa vesicle transport protein isoform X1 [Phalaenopsis equestris]	25.461	18.4355	14.8662	9.74551	10.2498	7.72236		Ce000051Fg22	OTU domain-containing protein [Carex littledalei]	18.1055	25.772	12.4465	8.90364	7.68591	4.37715		Ce000117Fg22	hypothetical protein FCM35_KLT11501 [Carex littledalei]	7.13068	10.9287	19.0849	17.2849	15.4162	3.4496		Ce000065Fg106	universal stress protein PHOS32 [Phoenix dactylifera]	0.647618	1.90216	11.5452	5.30512	3.55562	12.9046
Ce000029Fg20	putative glycerol-3-phosphate transporter 5 isoform X2 [Carex littledalei]	26.5938	16.1636	16.3743	11.9286	12.5927	6.85339		Ce000051Fg24	ABC transporter B family member 1-like protein [Carex littledalei]	14.6953	25.2056	18.4042	5.8727	4.65231	0.709007		Ce000117Fg31	alpha-1,4 glucan phosphorylase L isozyme [Carex littledalei]	57.83	210.256	278.784	880.904	1053.83	869.987		Ce000065Fg54	Bzip transcription factor ABI5, partial [Eleocharis dulcis]	7.69374	12.0729	18.1171	28.8315	27.9173	34.3532
Ce000029Fg23	Protein DA1 [Vitis vinifera]	26.7569	20.2028	12.608	6.28083	6.43364	3.48745		Ce000051Fg40	putative indole-3-pyruvate monooxygenase YUCCA5 [Carex littledalei]	4.65709	8.16186	20.8438	2.15107	0.26635	0.0772213		Ce000117Fg50	rhomboid-like protease 3 isoform X1 [Carex littledalei]	3.35456	1.8749	3.93655	8.84268	9.04178	5.07325		Ce000065Fg57	THO complex subunit 5A [Carex littledalei]	16.0607	11.3527	12.2305	23.1702	22.1399	32.659
Ce000029Fg24	hypothetical protein B296_00017516, partial [Ensete ventricosum]	49.9719	23.3676	16.2256	16.2014	11.7763	15.7623		Ce000051Fg43	Mediator of RNA polymerase II transcription subunit 15a [Carex littledalei]	133.622	228.506	185.912	93.9398	56.8152	19.787		Ce000117Fg63	formin-A-like protein [Carex littledalei]	21.7293	83.1689	143.98	125.148	117.987	40.6227		Ce000065Fg7	ferredoxin, root R-B1 [Carex littledalei]	6.38349	9.43363	19.6948	104.62	207.738	184.691
Ce000029Fg29	putative cadmium/zinc-transporting ATPase HMA1, chloroplastic [Ananas comosus]	16.5409	17.557	10.1504	8.15616	7.85287	6.28286		Ce000051Fg50	aminopyrimidine aminohydrolase [Carex littledalei]	38.3444	71.9488	60.1064	18.5513	16.9353	12.8023		Ce000117Fg74	bZIP transcription factor TRAB1-like isoform X1 [Carex littledalei]	45.167	68.6492	77.868	126.022	124.938	101.49		Ce000065Fg89	RNase H [Carex littledalei]	0.98391	1.36258	1.21433	3.74037	2.68637	7.74496
Ce000029Fg33	probable 2-oxoglutarate-dependent dioxygenase At3g50210 [Panicum hallii]	12.8707	10.1335	8.90423	8.38943	6.93483	5.73786		Ce000051Fg81	rho GDP-dissociation inhibitor 1-like protein [Carex littledalei]	19.1141	38.3815	24.253	7.34738	3.97072	1.61253		Ce000117Fg75		18.8064	35.9246	43.2343	52.9755	46.9688	20.3382		Ce000065Fg95	hypothetical protein FCM35_KLT00438 [Carex littledalei]	34.8621	16.1749	19.5677	50.1198	51.8564	73.9673
Ce000029Fg44	hypothetical protein SHCRBa_028_K12_R_170 [Saccharum hybrid cultivar R570]	28.328	12.5031	20.8548	6.92315	1.82922	0.373196		Ce000051Fg91	hypothetical protein FCM35_KLT20367 [Carex littledalei]	112.794	108.323	102.577	48.9492	44.4324	40.5857		Ce000117Fg76	Protein DJ-1 [Carex littledalei]	5.01584	4.44394	6.43583	13.8461	12.439	12.0767		Ce000066Fg109		81.7517	86.576	104.353	106.788	189.931	227.264
Ce000029Fg45	B2 protein [Elaeis guineensis]	72.0641	63.5468	58.9933	40.0702	32.2626	29.4773		Ce000052Fg107	hypothetical protein FCM35_KLT12572 [Carex littledalei]	15.5922	17.1441	17.0084	11.9292	10.7588	6.33818		Ce000118Fg11	uncharacterized protein LOC109716071 isoform X1 [Ananas comosus]	6.18637	2.64613	4.66289	25.604	38.8135	12.0249		Ce000066Fg123	D-cysteine desulfhydrase 2 [Carex littledalei]	37.0295	23.0625	25.3233	52.944	52.2043	136.071
Ce000029Fg62	putative dolichyl-diphosphooligosaccharide--protein glycosyltransferase subunit 3 [Ananas comosus]	27.2299	18.3792	9.10719	7.58208	6.07821	4.47871		Ce000052Fg137	Calmodulin-binding protein 25 [Carex littledalei]	6.51226	10.7075	18.5705	4.94841	5.00794	2.57574		Ce000118Fg3	Dof zinc finger protein DOF1.7 [Carex littledalei]	2.94786	2.98971	2.13709	8.7854	14.029	10.0171		Ce000066Fg124	pterin-4-alpha-carbinolamine dehydratase [Carex littledalei]	8.9292	5.86543	6.95182	14.8867	18.9256	34.98
Ce000029Fg65	peroxidase 1-like protein [Carex littledalei]	92.7319	31.1395	12.2735	0.129908	0.148516	0.00794167		Ce000052Fg145	magnesium-protoporphyrin IX monomethyl ester [Carex littledalei]	11.865	32.5267	70.3111	18.2839	7.61509	1.35441		Ce000118Fg39	E3 ubiquitin-protein ligase CIP8-like protein [Carex littledalei]	2.54106	0.963154	1.53243	5.05983	7.42545	5.13239		Ce000066Fg125	hypothetical protein FCM35_KLT21419 [Carex littledalei]	173.112	81.0969	90.6337	152.079	125.749	380.925
Ce000029Fg7	hypothetical protein C4D60_Mb07t23420 [Musa balbisiana]	13.5894	8.97227	5.98079	5.34458	3.04826	1.05732		Ce000052Fg15	zinc finger A20 and AN1 domain-containing stress-associated protein 5-like protein [Carex littledalei]	193.918	196.739	206.696	116.59	117.133	84.246		Ce000118Fg65	hypothetical protein GQ55_8G038600 [Panicum hallii var. hallii]	2.18118	1.34706	1.46447	7.20761	6.80941	3.27877		Ce000066Fg20	peroxiredoxin-2C-like protein [Carex littledalei]	88.9014	107.18	102.161	213.562	259.882	286.723
Ce000029Fg79	hypothetical protein FCM35_KLT15281 [Carex littledalei]	34.3925	3.06369	3.78881	5.01973	6.57597	1.49812		Ce000052Fg16	exostosin-1 [Carex littledalei]	6.66605	11.9405	17.8642	6.65611	6.39714	2.66223		Ce000119Fg25	protein PHYLLO [Carex littledalei]	3.31399	3.19173	3.83861	6.61901	5.08588	3.92832		Ce000066Fg25	putative E3 ubiquitin-protein ligase RF298 [Carex littledalei]	29.5784	22.4925	27.4922	88.7804	106.907	255.418
Ce000030Fg100	cyclic nucleotide-gated ion channel 9 [Carex littledalei]	22.1285	15.5832	12.2739	10.2203	8.45402	7.19844		Ce000052Fg17		7.27556	12.9062	18.9019	7.3236	7.29138	5.82953		Ce000119Fg27	hypothetical protein FCM35_KLT00493 [Carex littledalei]	2.76795	4.89262	11.6745	16.3154	18.6837	12.7674		Ce000066Fg28	Protein-lysine N-methyltransferase EEF2KMT [Carex littledalei]	1.98978	0.716339	1.01087	2.92751	3.8476	5.83245
Ce000030Fg16	microtubule-associated protein TORTIFOLIA1 [Carex littledalei]	12.8339	10.2143	9.40197	6.35711	5.14835	3.47529		Ce000052Fg41	hypothetical protein FCM35_KLT04424 [Carex littledalei]	33.3553	31.1927	32.913	19.0889	16.2562	11.004		Ce000119Fg59	bifunctional nuclease 2-like isoform X1 [Carex littledalei]	31.9024	45.7989	86.5846	100.261	67.471	84.7238		Ce000066Fg40	hypothetical protein BHM03_00000941 [Ensete ventricosum]	21.3897	10.2	8.1316	19.2935	26.8569	26.5295
Ce000030Fg22	phospholipase A I isoform X2 [Carex littledalei]	41.4008	40.9867	29.4314	11.6218	11.8025	11.3799		Ce000052Fg49	hypothetical protein FCM35_KLT04415 [Carex littledalei]	106.097	207.435	413.972	133.424	106.307	41.154		Ce000119Fg69	Phosphoenolpyruvate/phosphate translocator 2 [Carex littledalei]	87.4953	119.588	125.297	221.863	175.461	64.0727		Ce000066Fg79	hypothetical protein GH714_031530 [Hevea brasiliensis]	57.5056	36.2396	114.821	4413.89	11474.9	18798.8
Ce000030Fg9		22.5105	10.3887	3.80916	0.665135	0.416994	0		Ce000052Fg7	OTU domain-containing protein [Carex littledalei]	6.65667	17.9263	27.5648	4.57647	6.29033	8.10331		Ce000119Fg70	ocs element-binding factor 1-like protein [Carex littledalei]	15.6768	29.8143	59.6321	79.1871	101.425	18.0406		Ce000066Fg82	Dehydrin Rab15 [Ananas comosus]	11.0507	26.454	140.979	23431.5	33429	43374.6
Ce000031Fg101	hypothetical protein FCM35_KLT17533 [Carex littledalei]	22.36	6.74815	4.29505	4.46963	5.1576	2.0036		Ce000052Fg91	E3 ubiquitin-protein ligase RGLG2-like isoform X1 [Carex littledalei]	18.7881	70.697	79.6091	19.789	6.76576	0.906926		Ce000120Fg82	phospholipase D family protein [Carex littledalei]	18.9638	36.8422	42.9621	51.3686	44.9013	17.4345		Ce000066Fg83	hypothetical protein GH714_031530 [Hevea brasiliensis]	15.0413	22.1944	149.78	4749.25	5428.13	6025.23
Ce000031Fg117	esterase D14L [Carex littledalei]	39.07	37.1991	27.6504	25.2377	22.7563	13.4447		Ce000053Fg11	GLABRA2 expression modulator [Carex littledalei]	26.7412	29.6951	25.487	15.156	13.2489	5.76405		Ce000120Fg83	high mobility group B protein 9-like protein [Carex littledalei]	0.805881	1.35649	3.41262	9.45921	7.52719	1.27726		Ce000067Fg102	motile sperm domain-containing protein 2-like protein [Carex littledalei]	3.48715	8.32756	5.36678	7.68364	4.81789	8.38132
Ce000031Fg124	aspartic proteinase nepenthesin-1-like protein [Carex littledalei]	14.1758	10.5151	7.40548	5.89273	4.85353	3.87986		Ce000053Fg122	putative cell wall protein [Carex littledalei]	13.6284	34.8999	4.64805	0.873835	0.191828	0.0595487		Ce000120Fg87	Enoyl-CoA hydratase 2 [Carex littledalei]	47.1491	62.8448	69.8676	102.403	103.962	87.2763		Ce000067Fg103	uncharacterized protein LOC109745074 [Aegilops tauschii subsp. tauschii]	0.035574	0	0.0731447	4.98845	4.01729	8.99079
Ce000031Fg135	LON peptidase N-terminal domain and RING finger protein 1 [Carex littledalei]	14.1177	6.08169	8.23372	7.48344	9.53519	4.91677		Ce000054Fg116	hypothetical protein C4D60_Mb01t01030 [Musa balbisiana]	7.66587	31.8026	34.2978	5.44878	1.76014	0.33265		Ce000121Fg3	ocs element-binding factor 1-like protein [Carex littledalei]	9.46769	22.6202	46.8935	54.2776	73.1099	10.0643		Ce000067Fg104	Alpha-glucan water dikinase, chloroplastic [Ananas comosus]	22.4842	15.2297	28.063	87.3168	69.8977	258.599
Ce000031Fg145	putative WRKY transcription factor 4 [Carex littledalei]	16.27	13.0995	8.29059	6.25359	5.57158	5.29598		Ce000054Fg120	alpha-humulene synthase-like protein [Carex littledalei]	29.023	234.709	100.078	1.46365	0.134998	0.026207		Ce000121Fg39	hypothetical protein FCM35_KLT00493 [Carex littledalei]	1.38892	4.63379	5.50441	7.03614	9.53912	8.8929		Ce000067Fg19	G patch domain-containing protein 1 [Carex littledalei]	5.74449	4.40864	5.80416	9.02028	10.8469	16.2971
Ce000031Fg34	Microtubule-associated protein [Trema orientale]	41.965	31.5482	30.5439	18.5121	14.8144	9.62043		Ce000054Fg15	mitochondrial ubiquitin ligase activator of NFKB 1 isoform X2 [Carex littledalei]	12.3095	11.814	13.5819	14.2195	11.5472	5.6275		Ce000121Fg4	Phosphoenolpyruvate/phosphate translocator 2 [Carex littledalei]	74.2374	95.6056	99.4153	181.503	150.099	75.8745		Ce000067Fg41	universal stress protein A-like protein [Carex littledalei]	29.2579	21.1758	20.1887	44.7712	49.8742	114.24
Ce000031Fg35		28.3347	19.7782	18.3486	12.7203	10.1086	7.15641		Ce000054Fg47	hypothetical protein FCM35_KLT05590 [Carex littledalei]	836.033	1782.83	1786.54	514.464	367.749	191.465		Ce000121Fg69	Mitochondrial glycoprotein [Carex littledalei]	4.14899	3.74798	4.63609	8.55185	7.1145	7.62525		Ce000067Fg57	Heat shock cognate protein [Carex littledalei]	117.423	117.406	218.462	180.162	443.324	575.794
Ce000031Fg63	hypothetical protein C4D60_Mb03t06270 [Musa balbisiana]	76.7593	64.667	46.6264	9.34291	7.40962	5.0338		Ce000054Fg49	GTP-binding nuclear protein Ran1B [Vitis vinifera]	83.2009	353.784	419.6	30.8843	52.9921	4.36378		Ce000121Fg9	bifunctional nuclease 2-like isoform X1 [Carex littledalei]	28.5145	31.653	55.4773	99.5169	65.9129	87.5506		Ce000068Fg1	nucleolin [Carex littledalei]	6.31126	8.43478	6.57269	5.55332	7.11077	13.0445
Ce000031Fg65	NAC domain-containing protein 17 [Carex littledalei]	53.3231	46.2858	37.0786	28.7181	24.2617	28.168		Ce000054Fg50	Arylesterase [Carex littledalei]	2.77934	9.38212	5.49252	0.99843	0.676003	0.02367		Ce000122Fg10	3-isopropylmalate dehydratase small subunit 3-like protein [Carex littledalei]	59.7627	71.4752	79.6761	106.268	128.804	112.165		Ce000068Fg114	metal ion binding protein [Carex littledalei]	2.44637	0.719762	3.43392	9.9904	6.87388	18.6396
Ce000031Fg66	unnamed protein product [Triticum turgidum subsp. durum]	160.122	101.049	87.6737	43.9426	33.3592	16.4303		Ce000054Fg51	hypothetical protein BHM03_00029580 [Ensete ventricosum]	12.0831	18.3149	13.6757	5.14538	3.59713	2.00552		Ce000122Fg104	malonyl-CoA-acyl carrier protein transacylase [Carex littledalei]	88.6598	102.753	141.188	324.548	269.615	82.3136		Ce000068Fg115	Heavy-metal-associated domain-containing protein [Carex littledalei]	0.689965	3.23832	8.15116	64.0747	60.5571	128.284
Ce000031Fg69	hypothetical protein FCM35_KLT17557 [Carex littledalei]	22.0917	22.9044	14.0234	10.0656	6.36108	0.57227		Ce000055Fg117	receptor-like protein kinase [Carex littledalei]	20.7209	25.2835	19.7735	11.3296	9.15055	4.85378		Ce000122Fg4	50S ribosomal protein L10 [Carex littledalei]	9.06576	23.0487	27.0227	30.1258	22.6242	21.1905		Ce000068Fg20	hypothetical protein FCM35_KLT16199 [Carex littledalei]	5.62136	8.83052	10.2967	20.7883	20.7803	27.4447
Ce000031Fg86	tetratricopeptide repeat protein 37 [Carex littledalei]	34.3726	22.7435	19.5508	23.1688	15.6166	18.1344		Ce000055Fg15	UDP-glucose pyrophosphorylase2 [Zea mays]	84.7971	433.15	424.978	298.591	283.776	62.9014		Ce000122Fg44	SNF1-related protein kinase catalytic subunit alpha KIN10 [Carex littledalei]	25.5915	31.3291	41.0924	79.1786	65.3944	37.3682		Ce000068Fg46	BP28CT (NUC211) domain-containing protein [Carex littledalei]	28.7528	10.306	15.1062	28.8462	22.7631	32.8111
Ce000032Fg105	Lipase (class 3) [Carex littledalei]	20.0724	23.1323	13.8384	8.76108	6.37867	8.38816		Ce000055Fg25	PREDICTED: pyruvate kinase, cytosolic isozyme [Musa acuminata subsp. malaccensis]	186.511	259.602	292.333	29.103	13.6906	3.49785		Ce000122Fg7	two-component response regulator-like PRR37 isoform X2 [Carex littledalei]	48.3335	70.2065	73.5855	113.367	69.3664	64.4966		Ce000068Fg70	rho GTPase-activating protein 5-like isoform X1 [Carex littledalei]	37.8261	25.9544	30.6291	80.1848	60.7037	109.87
Ce000032Fg112	Actin depolymerizing factor 7 [Carex littledalei]	147.003	73.5693	104.773	111.868	98.0367	59.8934		Ce000055Fg42	hypothetical protein EJB05_19115 [Eragrostis curvula]	102.366	140.929	186.393	86.7715	49.7129	11.1443		Ce000122Fg93	hypothetical protein FCM35_KLT03209 [Carex littledalei]	0.409726	0.230288	1.56922	8.03446	6.14463	2.35939		Ce000068Fg72	putative deoxyribonuclease TATDN3 [Carex littledalei]	13.9105	9.62988	12.6409	36.3993	41.3734	121.637
Ce000032Fg115	Adenine phosphoribosyltransferase 1, chloroplastic [Apostasia shenzhenica]	53.7619	30.2544	28.6721	15.2731	12.9989	6.96069		Ce000055Fg44	protein ABCI7, chloroplastic [Ananas comosus]	10.8324	18.1417	24.8444	20.8262	16.8524	13.1829		Ce000123Fg61	putative metal-nicotianamine transporter YSL14 isoform X2 [Carex littledalei]	58.3633	17.854	16.4062	45.4	45.7903	37.488		Ce000068Fg78	1-aminocyclopropane-1-carboxylate synthase-like protein [Carex littledalei]	26.2688	9.04264	3.18188	9.31413	2.49508	44.2518
Ce000032Fg133	Rho GTPase-activating protein [Carex littledalei]	23.1692	10.1923	9.74934	8.32999	9.2232	13.1837		Ce000055Fg47	hypothetical protein C5167_019358 [Papaver somniferum]	20.6622	25.1274	18.8586	10.7764	9.3509	2.93034		Ce000123Fg78	mTERF [Carex littledalei]	9.47337	12.7194	18.3551	24.9912	25.1227	17.253		Ce000068Fg83	protein SPIRAL1-like 5 [Carex littledalei]	2.08172	0	0.343448	3.51693	12.9785	26.6219
Ce000032Fg135	protein RTF2 [Carex littledalei]	28.5637	24.8932	24.3715	13.4338	13.3283	8.94182		Ce000055Fg59	cytochrome P450 714C2 [Dendrobium catenatum]	4.32679	64.0075	31.9662	0.341101	0.153477	0.125022		Ce000123Fg81	MATE efflux family protein 5 [Carex littledalei]	4.71234	5.88212	5.24336	11.3275	7.92938	2.26787		Ce000069Fg101	histone-lysine N-methyltransferase EZ2 isoform X5 [Carex littledalei]	6.00493	6.63172	8.54977	22.0737	18.0204	21.2486
Ce000032Fg146	GRAM domain-containing protein 1A isoform X1 [Carex littledalei]	52.652	25.1996	24.7163	42.2	37.4986	27.5644		Ce000055Fg76	acyl-CoA-binding domain-containing protein 4 isoform X1 [Phoenix dactylifera]	37.4785	35.374	42.0438	12.8758	10.4275	11.3794		Ce000124Fg17	Dynamin-related protein 4C [Carex littledalei]	4.14859	2.28539	3.49614	7.40593	8.79958	1.65013		Ce000069Fg108	Calvin cycle protein CP12-1 [Carex littledalei]	10.9693	11.62	14.8695	33.1305	22.0162	42.9675
Ce000032Fg154	nucleolin [Carex littledalei]	41.8544	38.7191	29.203	26.8561	21.8694	17.9277		Ce000056Fg100	hypothetical protein FCM35_KLT05884 [Carex littledalei]	33.9546	70.2947	34.6852	5.52208	8.18425	0.468685		Ce000124Fg67	ethylene-responsive transcription factor TINY-like protein [Carex littledalei]	5.43381	2.12964	3.83723	27.0403	16.5455	3.60777		Ce000069Fg129	Acetate/butyrate--CoA ligase AAE7 [Carex littledalei]	31.2884	217.552	178.911	171.9	146.709	446.083
Ce000032Fg158	unknown [Lotus japonicus]	66.8506	50.9553	46.2154	39.5191	39.5389	25.1769		Ce000056Fg114	60S ribosomal protein L18a-like protein [Carex littledalei]	133.897	161.249	90.4322	27.396	20.8995	12.2036		Ce000124Fg96	NEDD8-activating enzyme E1 catalytic subunit [Asparagus officinalis]	21.3438	17.8678	20.7962	36.1619	45.0908	34.2363		Ce000069Fg132		55.4291	52.9258	82.062	174.574	185.138	698.44
Ce000032Fg159	regulator of nonsense transcripts 1 [Carex littledalei]	28.5442	20.341	19.9151	15.827	12.7696	15.2149		Ce000056Fg12	hypothetical protein FCM35_KLT05631 [Carex littledalei]	249.411	399.016	560.069	231.342	190.757	45.612		Ce000125Fg19	Protein RETICULATA-RELATED 6 [Carex littledalei]	31.3794	41.566	48.2388	83.6331	68.2421	66.4359		Ce000069Fg138	F-box protein SKIP23 [Carex littledalei]	4.16004	2.19833	2.58308	8.05892	11.495	31.0124
Ce000032Fg162	putative phosphomevalonate kinase [Carex littledalei]	45.7502	34.478	19.4653	5.63055	5.00407	0.932952		Ce000056Fg21	peroxisomal fatty acid beta-oxidation multifunctional protein [Carex littledalei]	94.3774	163.499	89.6261	37.9353	38.4325	36.144		Ce000125Fg20	protein IN CHLOROPLAST ATPASE BIOGENESIS, chloroplastic isoform X4 [Populus alba]	9.89555	12.7599	19.3296	24.2507	20.6016	15.0923		Ce000069Fg18	(+)-neomenthol dehydrogenase-like isoform X2 [Carex littledalei]	7.52498	8.23592	8.93861	12.719	12.9252	17.4629
Ce000032Fg164	putative inactive poly [Carex littledalei]	132.327	131.072	106.553	47.1	40.1013	39.3197		Ce000056Fg30	auxin-responsive protein IAA21-like protein [Carex littledalei]	367.752	794.623	737.636	447.737	311.184	111.092		Ce000125Fg55	hypothetical protein FCM35_KLT20831 [Carex littledalei]	20.2107	33.3284	48.7807	110.78	140.23	107.833		Ce000069Fg21		0	0	0.0984313	3.7708	18.1687	16.0116
Ce000032Fg187	uric acid degradation bifunctional protein TTL-like isoform X1 [Carex littledalei]	36.3702	22.9806	17.404	19.3169	24.0405	23.892		Ce000056Fg40	putative aquaporin TIP4-3 [Carex littledalei]	111.484	409.333	353.584	6.87349	1.54508	0.0629977		Ce000126Fg11_Ce000126Fg12_Ce000126Fg13_Ce000126Fg14	ABC transporter C family member 10-like protein [Carex littledalei]	3.86857	4.52371	4.45571	8.92407	8.49741	2.27693		Ce000069Fg22	ECP63 protein [Carex littledalei]	1.15731	2.59666	14.3896	854.142	1284.96	1804.17
Ce000032Fg19	hypothetical protein FCM35_KLT20160 [Carex littledalei]	90.4476	51.3565	37.3788	11.6262	5.56214	2.77703		Ce000056Fg45	putative ubiquitin-conjugating enzyme E2 38 [Carex littledalei]	18.172	20.0819	19.1193	22.5034	17.7315	6.94668		Ce000127Fg4	glucose-6-phosphate/phosphate translocator 2 [Carex littledalei]	57.7894	67.3719	74.2199	121.601	101.005	41.5046		Ce000069Fg65	galactinol synthase 2 [Panicum miliaceum]	8.17151	19.1403	9.58259	2.82731	2.06118	86.2788
Ce000032Fg20	non-lysosomal glucosylceramidase-like protein [Carex littledalei]	45.3707	29.4011	33.9685	6.93791	4.88014	2.89717		Ce000056Fg59	putative pectinesterase/pectinesterase inhibitor 34 [Carex littledalei]	37.0165	128.219	164.82	14.0084	14.9133	1.34599		Ce000128Fg118	Methyl-CpG-binding domain-containing protein 4 [Carex littledalei]	12.0903	10.1602	13.0623	28.9177	32.268	16.0287		Ce000069Fg67	30S ribosomal protein S1, chloroplast precursor [Carex littledalei]	3.38891	3.10851	2.57198	7.48083	5.2312	13.8579
Ce000032Fg34	aquaporin PIP2-4-like protein [Carex littledalei]	561.486	139.223	121.381	34.4036	18.9412	3.76694		Ce000056Fg7	GDSL esterase/lipase [Carex littledalei]	41.8768	66.7535	42.9069	9.86739	4.87939	2.46073		Ce000128Fg26	50S ribosomal protein L1 [Carex littledalei]	5.73365	8.90524	10.4992	11.7719	10.3686	7.64904		Ce000069Fg72	nifU-like protein 1 [Carex littledalei]	3.62179	7.39406	8.33869	15.0287	8.70798	14.3701
Ce000032Fg44	Alpha-galactosidase [Zea mays]	41.9723	7.40673	10.0563	1.21225	0.368567	0.127944		Ce000056Fg82	Transcription factor ABA-INDUCIBLE bHLH-TYPE [Carex littledalei]	34.8564	68.4664	67.2709	35.8708	27.3361	14.7087		Ce000128Fg35	Protein PALE CRESS [Carex littledalei]	3.4922	5.63785	7.16526	13.4866	14.518	9.72949		Ce000069Fg75	probable pre-mRNA-splicing factor ATP-dependent RNA helicase DEAH2 isoform X2 [Prosopis alba]	35.724	44.3868	44.0983	62.5719	36.4339	104.322
Ce000032Fg57	hypothetical protein TRIUR3_32571 [Triticum urartu]	30.0089	18.642	17.7494	11.5161	10.8234	7.23912		Ce000057Fg17	Zinc finger CCCH domain-containing protein 2 [Carex littledalei]	150.199	449.346	604.272	231.739	191.016	41.8552		Ce000128Fg58	biotin carboxylase 2 [Carex littledalei]	50.7017	77.6427	108.502	307.525	262.351	135.82		Ce000069Fg77	hypothetical protein FCM35_KLT12643 [Carex littledalei]	2.35076	8.62069	5.38685	6.22702	6.71848	8.10619
Ce000032Fg58	clathrin light chain 2-like protein [Carex littledalei]	99.9753	78.8214	62.0894	50.5926	53.1887	47.2171		Ce000057Fg18	Zinc finger CCCH domain-containing protein 2 [Carex littledalei]	50.9474	70.6696	116.528	24.6056	15.5063	1.8224		Ce000128Fg99	pyruvate dehydrogenase E1 component subunit beta isoform X1 [Carex littledalei]	43.6364	37.881	54.9821	198.815	205.993	120.959		Ce000069Fg83	NHL repeat-containing protein 2 isoform X1 [Carex littledalei]	12.9971	12.2704	17.7929	19.5615	12.3757	38.6635
Ce000032Fg7	hypothetical protein C4D60_Mb07t18390 [Musa balbisiana]	61.3358	32.3753	28.0221	37.3305	31.0762	30.9306		Ce000057Fg34	hypothetical protein FCM35_KLT11123 [Carex littledalei]	41.9485	39.7227	52.3662	19.8398	12.0573	3.30624		Ce000129Fg105	Transcription-repair-coupling factor [Carex littledalei]	2.62994	2.71937	3.03777	7.3231	7.61808	5.61661		Ce000069Fg84	NHL repeat-containing protein 2 isoform X1 [Carex littledalei]	9.37204	12.5247	14.6184	21.0267	9.33283	25.3381
Ce000032Fg70		21.5864	8.0224	6.91281	1.95005	0.737178	0.234212		Ce000057Fg63	Alpha/beta hydrolase family [Carex littledalei]	18.5981	19.0758	17.9652	5.65333	4.16122	0.587403		Ce000129Fg114	Succinate dehydrogenase assembly factor 2 [Carex littledalei]	6.31131	5.37212	16.2182	13.8323	21.7723	3.93746		Ce000069Fg97	DEAD-box ATP-dependent RNA helicase 24-like protein [Carex littledalei]	12.1394	13.2397	13.3591	20.6432	17.0878	29.1575
Ce000032Fg82	protein GRIP isoform X1 [Carex littledalei]	38.0758	34.894	31.0987	27.6298	26.545	16.8103		Ce000057Fg8	fibrous sheath CABYR-binding protein-like protein [Carex littledalei]	22.9712	43.898	47.5195	35.3234	28.2181	26.2135		Ce000129Fg115	Succinate dehydrogenase assembly factor 2 [Carex littledalei]	10.5839	12.5909	31.2382	31.0268	47.1995	14.9697		Ce000070Fg107	TPR repeat [Carex littledalei]	9.41967	10.5557	9.43422	21.3642	28.18	50.1467
Ce000032Fg83	serine/threonine-protein kinase SRPK-like protein [Carex littledalei]	15.5587	6.7351	3.8161	3.63772	3.42977	2.28144		Ce000058Fg100	BAG family molecular chaperone regulator 7-like protein [Carex littledalei]	144.194	155.197	112.518	49.1172	38.3272	26.2805		Ce000129Fg78	hypothetical protein Ccrd_012394 [Cynara cardunculus var. scolymus]	1.30469	8.59761	53.1802	34.6885	18.5314	0.04681		Ce000070Fg17	vacuolar protein sorting-associated protein 27 isoform X2 [Carex littledalei]	41.1011	39.9734	37.36	83.306	77.6525	149.05
Ce000032Fg84	SPX and EXS domain-containing protein 1-like isoform X1 [Carex littledalei]	39.1037	18.6694	9.54651	8.36313	6.29364	6.21736		Ce000058Fg101	beta-fructofuranosidase 1-like protein [Carex littledalei]	124.306	279.893	77.9407	1.55475	0.566579	0.006555		Ce000129Fg88	transportin-3 isoform X1 [Carex littledalei]	10.1682	14.4074	18.6056	33.9965	32.8247	20.4953		Ce000070Fg99	Beta-amylase 1 [Carex littledalei]	39.9772	58.1074	52.0767	128.816	349.603	695.022
Ce000032Fg90	hypothetical protein FCM35_KLT20077 [Carex littledalei]	11.4615	8.61666	8.04612	5.66831	6.15166	3.00955		Ce000058Fg12	hypothetical protein FCM35_KLT11014 [Carex littledalei]	24.2302	51.0577	40.3205	15.1836	17.3187	12.8866		Ce000129Fg9		2.7863	2.08015	2.21354	4.98138	5.60901	4.82893		Ce000071Fg100	Bifunctional epoxide hydrolase 2 [Carex littledalei]	8.39404	4.47611	4.11143	10.993	12.7671	17.239
Ce000032Fg96		33.9164	29.0221	22.567	14.2971	10.0172	7.82555		Ce000058Fg158	peptide methionine sulfoxide reductase A5 [Elaeis guineensis]	41.1168	42.1126	44.4706	22.1434	15.6787	9.01876		Ce000130Fg34	Ethylene receptor [Carex littledalei]	0.105572	6.81137	52.6393	237.551	217.417	10.8084		Ce000071Fg102	lanC-like protein GCL2 isoform X1 [Carex littledalei]	9.43036	14.0365	14.6965	31.635	33.5791	81.7469
Ce000033Fg24	stress protein-like protein [Carex littledalei]	24.8131	16.9397	15.9361	14.7359	14.3188	11.5788		Ce000058Fg162	ClpP [Corchorus capsularis]	4.53109	9.97379	12.8619	7.0808	7.98186	8.48183		Ce000130Fg62	unnamed protein product [Prunus armeniaca]	10.7659	14.2116	19.9758	28.2666	28.4259	18.4529		Ce000071Fg126	unnamed protein product [Ananas comosus var. bracteatus]	9.81491	2.70132	3.33351	412.405	446.51	750.232
Ce000033Fg36	putative signal peptidase complex subunit 3 [Carex littledalei]	15.6086	9.85336	9.19992	6.6592	6.91956	6.80883		Ce000058Fg24	activator of heat shock protein ATPase [Carex littledalei]	13.1346	28.0425	18.0938	7.92243	5.43029	3.89988		Ce000130Fg82	putative aquaporin NIP5-1 [Carex littledalei]	5.24228	3.19474	67.6928	153.59	134.937	41.3947		Ce000071Fg129	Protein TIC110, chloroplastic [Ananas comosus]	61.1219	51.6261	63.1443	136.675	129.755	282.667
Ce000033Fg86	putative receptor-like protein kinase At4g00960 [Elaeis guineensis]	21.6731	16.636	8.01186	6.91939	10.3691	7.46358		Ce000058Fg26	threonine--tRNA ligase [Carex littledalei]	30.5207	26.0036	30.5306	20.9397	14.9294	9.16114		Ce000130Fg83	synaptonemal complex protein ZEP1-like protein [Carex littledalei]	0.068329	4.20046	11.105	43.4881	42.5358	32.2808		Ce000071Fg52		3.57186	2.41143	22.9367	59.5958	107.292	459.684
Ce000034Fg10	NagB/RpiA/CoA transferase-like superfamily protein [Zea mays]	19.4885	9.28815	11.8057	11.3506	15.3631	10.3713		Ce000058Fg59	5'-methylthioadenosine/S-adenosylhomocysteine nucleosidase 2-like protein [Carex littledalei]	26.8655	58.3867	50.6396	24.0771	22.1018	9.84522		Ce000131Fg1	F-box/kelch-repeat protein [Carex littledalei]	2.7453	3.60218	4.26462	8.86573	6.30851	6.93738		Ce000071Fg53	--	10.947	5.35456	70.2834	188.541	321.289	903.154
Ce000034Fg100		48.0248	27.0033	17.5517	1.70775	1.68452	0.764759		Ce000058Fg64	unnamed protein product [Digitaria exilis]	41.1629	49.8252	30.667	17.1904	11.0415	12.1794		Ce000131Fg11	Protein OVEREXPRESSOR OF CATIONIC PEROXIDASE 3 [Carex littledalei]	5.95704	15.0769	18.1308	24.1916	17.4584	23.9207		Ce000071Fg63	membrane steroid-binding protein 1 [Elaeis guineensis]	103.052	52.9525	44.2473	63.1549	65.9393	177.12
Ce000034Fg103	hypothetical protein FCM35_KLT08081 [Carex littledalei]	107.96	59.162	49.8243	25.6788	25.7346	18.7364		Ce000058Fg70	ent-kaurenoic acid oxidase 1-like protein [Carex littledalei]	6.38211	9.8281	14.0342	7.86412	5.96859	7.74318		Ce000131Fg25	ENT domain-containing protein [Carex littledalei]	5.87916	11.9938	10.6887	37.2841	39.5727	16.2139		Ce000071Fg75	ribosomal-protein-alanine acetyltransferase [Carex littledalei]	1.99052	1.85511	1.56641	3.34792	4.19711	5.76951
Ce000034Fg106	alcohol dehydrogenase-like 7 isoform X2 [Phoenix dactylifera]	88.4003	18.8051	6.07113	34.3616	19.1065	63.212		Ce000058Fg82	L-lactate dehydrogenase A-like protein [Carex littledalei]	157.855	248.3	187.226	24.7659	9.47267	1.08099		Ce000131Fg53	palmitoyl-acyl carrier protein thioesterase [Carex littledalei]	96.2787	100.82	133.565	420.57	347.962	205.962		Ce000071Fg77	monothiol glutaredoxin-S11 [Carex littledalei]	55.9966	45.6668	55.9925	83.447	87.8766	154.736
Ce000034Fg12	protein TIFY 10A-like protein [Carex littledalei]	483.08	286.633	252.691	48.9701	34.504	10.8652		Ce000058Fg84	transcription factor PIF3-like isoform X2 [Carex littledalei]	17.5333	40.1282	28.6659	17.6183	13.4923	7.99796		Ce000132Fg30	Hyoscyamine 6-dioxygenase [Carex littledalei]	9.25512	8.03783	16.9826	38.0762	56.4401	35.7985		Ce000071Fg82	TPR repeat-containing protein [Carex littledalei]	6.16659	4.99677	12.3681	42.1672	45.429	81.0266
Ce000034Fg120	Lipase 3 [Carex littledalei]	24.8723	24.2922	19.2962	15.3497	13.3367	9.29615		Ce000058Fg89	Rhomboid-like protein 14 [Carex littledalei]	13.1244	36.7569	43.4694	3.99334	6.3961	7.22592		Ce000132Fg53	acetyl-coenzyme A carboxylase carboxyl transferase subunit alpha [Carex littledalei]	124.69	151.266	219.181	707.945	651.764	369.979		Ce000071Fg98	Bifunctional epoxide hydrolase 2 [Carex littledalei]	0	0	0.147473	0.829561	1.52752	9.59768
Ce000034Fg121	putative protein phosphatase 2C 41 isoform X1 [Carex littledalei]	32.5069	27.4313	11.8301	6.12375	5.59085	2.93614		Ce000059Fg10	porphobilinogen deaminase [Carex littledalei]	23.0843	51.0529	43.0742	35.746	23.2232	17.8286		Ce000132Fg71	protein LOW PSII ACCUMULATION 3 [Carex littledalei]	4.48962	7.19761	9.40866	10.0507	8.66938	6.49356		Ce000071Fg99	Bifunctional epoxide hydrolase 2 [Carex littledalei]	0	0.0773477	0.207624	1.56667	3.83206	15.4533
Ce000034Fg129	calmodulin-binding transcription activator 3-like isoform X2 [Carex littledalei]	54.1914	36.7577	28.4635	20.236	16.816	10.0313		Ce000059Fg27	molybdenum cofactor sulfurase isoform X3 [Carex littledalei]	6.15785	11.5732	12.3513	8.39024	9.04858	7.70179		Ce000133Fg3	hypothetical protein FCM35_KLT12045 [Carex littledalei]	7.82657	20.2951	43.1023	49.1327	26.5712	43.1011		Ce000072Fg28	E3 ubiquitin-protein ligase RNF19B-like protein [Carex littledalei]	3.94058	3.73809	5.97558	5.97176	8.08709	13.1202
Ce000034Fg13	protein TIFY 10A-like protein [Carex littledalei]	514.071	480.173	416.17	161.481	94.7563	37.8608		Ce000059Fg37	hypothetical protein Lal_00043894 [Lupinus albus]	103.624	126.908	140.963	36.1384	21.4538	11.2789		Ce000133Fg9	zinc finger protein ZAT10 [Carex littledalei]	2.55665	2.90104	9.61964	4.67655	6.72689	1.5488		Ce000072Fg75	phenylalanine ammonia lyase 62 [Carex littledalei]	2.40873	1.28538	1.49312	8.21612	9.11142	22.7286
Ce000034Fg14	protein TIFY 10B-like protein [Carex littledalei]	337.387	198.09	106.685	21.1622	20.153	2.3189		Ce000059Fg61	protein FAR1-RELATED SEQUENCE 6 [Elaeis guineensis]	71.1292	68.2055	70.2259	54.2706	49.0418	28.0207		Ce000134Fg25	hypothetical protein F2Q69_00050930 [Brassica cretica]	15.6726	45.0293	50.9866	46.1935	43.9247	30.0601		Ce000072Fg76	50S ribosomal protein L19 [Carex littledalei]	8.16332	7.39299	9.41297	14.4832	14.6104	22.4264
Ce000034Fg145	acetyl-CoA carboxylase 1-like protein [Carex littledalei]	61.9792	24.3045	11.7863	15.67	19.2609	13.8817		Ce000059Fg63	UDP-arabinose 4-epimerase 1 [Glycine max]	89.242	139.905	42.2212	21.4991	19.6853	10.3553		Ce000134Fg42	hypothetical protein B456_013G234000 [Gossypium raimondii]	6.86388	4.46412	4.56275	17.032	15.7539	11.6245		Ce000073Fg139	Developmentally regulated G-protein 1 isoform 1 [Carex littledalei]	20.8207	21.7013	26.8043	27.3246	22.3	43.8131
Ce000034Fg15	3-ketoacyl-CoA synthase 10-like protein [Carex littledalei]	58.2637	20.0331	5.28595	5.72794	1.37983	0.0226843		Ce000060Fg108	2-phosphoglycerate kinase [Carex littledalei]	18.4273	19.0567	19.0676	12.5835	12.9301	8.89884		Ce000134Fg6	hypothetical protein FCM35_KLT02147 [Carex littledalei]	5.2883	5.49857	8.26451	14.3299	10.9258	6.24581		Ce000073Fg38	uncharacterized protein LOC101785264 [Setaria italica]	38.3615	23.5117	30.2698	60.3218	66.0784	157.409
Ce000034Fg154	F-box/kelch-repeat protein [Carex littledalei]	36.0744	15.0312	13.2334	11.77	13.2582	19.5857		Ce000060Fg113	regulatory protein NPR3-like protein [Carex littledalei]	58.9038	97.617	75.1506	20.1408	15.383	9.67513		Ce000134Fg63	reticulon-like protein B2 [Carex littledalei]	35.848	27.3469	31.1289	70.8341	71.9232	67.9283		Ce000073Fg81	unnamed protein product [Triticum turgidum subsp. durum]	0.0229767	22.3949	40.8959	79.0967	30.1256	144.216
Ce000034Fg162	alanine--glyoxylate aminotransferase 2 1 [Carex littledalei]	40.7304	36.1235	33.5945	21.2729	23.7043	13.001		Ce000060Fg115	ninja-family protein mc410 [Carex littledalei]	81.1224	110.195	59.4069	23.588	18.0255	10.1862		Ce000134Fg92	Argininosuccinate synthase [Carex littledalei]	19.2826	38.3112	58.8412	67.1173	48.3672	23.2281		Ce000073Fg82	putative receptor-like protein kinase [Carex littledalei]	34.7228	41.1693	44.7006	44.8804	43.5116	106.48
Ce000034Fg168	hypothetical protein FCM35_KLT08023 [Carex littledalei]	106.311	50.1367	34.1685	24.0517	15.2141	9.1234		Ce000060Fg116		28.8957	38.7126	19.3954	8.10121	7.24622	2.66643		Ce000134Fg99	50S ribosomal protein L21 [Carex littledalei]	8.61146	17.0384	18.8263	21.2208	19.1244	14.2831		Ce000074Fg100	KAT8 regulatory NSL complex subunit 3 isoform X1 [Carex littledalei]	2.31442	1.91963	4.86907	8.23933	14.3877	30.5976
Ce000034Fg178	Protein kinase 2B [Carex littledalei]	20.7214	16.8358	14.9864	7.94238	4.37522	5.60489		Ce000060Fg120	PREDICTED: persulfide dioxygenase ETHE1 homolog, mitochondrial-like [Capsicum annuum]	161.361	427.39	621.65	255.393	183.66	78.8976		Ce000135Fg58	thioredoxin-like protein Clot [Carex littledalei]	12.4597	40.0096	61.9168	69.8648	64.4441	23.8905		Ce000074Fg109		13.7963	47.9405	165.282	2862.51	4902.3	6966.47
Ce000034Fg27	hypothetical protein C4D60_Mb10t12810 [Musa balbisiana]	44.6592	32.2975	16.2091	4.87721	3.39734	2.79388		Ce000060Fg142	hypothetical protein CK203_027241 [Vitis vinifera]	15.792	51.0258	27.6429	34.0052	18.4782	37.223		Ce000135Fg63	LOW QUALITY PROTEIN: beta-galactosidase 3 [Brachypodium distachyon]	31.3336	22.4266	25.5049	81.0877	79.7019	64.8005		Ce000074Fg110	hypothetical protein FCM35_KLT05691 [Carex littledalei]	49.0502	7.43959	12.4977	39.5032	57.9425	138.004
Ce000034Fg28	hypothetical protein E2562_022942 [Oryza meyeriana var. granulata]	189.74	127.265	128.765	143.593	93.3491	74.9276		Ce000060Fg144	hypothetical protein FCM35_KLT07663 [Carex littledalei]	6.7538	14.7227	21.3963	6.96183	9.80786	8.34097		Ce000135Fg78	putative pyridoxal biosynthesis protein PDX1.1 [Carex littledalei]	5.16012	40.1697	58.072	75.3319	85.5836	34.465		Ce000074Fg114	Abscisic acid receptor PYL8 [Carex littledalei]	26.8207	17.1213	14.1491	30.6543	22.828	67.2917
Ce000034Fg37	hypothetical protein E2562_009462 [Oryza meyeriana var. granulata]	133.81	114.57	53.8113	14.3103	5.9813	2.22441		Ce000060Fg29	serine/threonine-protein kinase 38-like protein [Carex littledalei]	27.8288	28.0689	26.7032	16.3962	15.6574	8.46017		Ce000136Fg57	hypothetical protein FCM35_KLT03260 [Carex littledalei]	6.50946	11.6251	10.9984	12.4274	13.8322	11.1473		Ce000074Fg66	hypothetical protein FCM35_KLT05715 [Carex littledalei]	116.247	30.2572	35.8042	61.1983	75.4842	150.603
Ce000034Fg48	UDP-glucuronate:xylan alpha-glucuronosyltransferase 2-like isoform X2 [Ananas comosus]	173.157	137.981	89.2802	42.9883	41.8236	13.9254		Ce000060Fg36	PREDICTED: persulfide dioxygenase ETHE1 homolog, mitochondrial-like [Capsicum annuum]	136.189	342.759	446.339	204.899	144	80.4655		Ce000137Fg16	uncharacterized protein LOC105060094 isoform X2 [Elaeis guineensis]	2.41825	1.97039	2.83179	4.7637	6.47	0.939322		Ce000074Fg74	Protein FAR1-RELATED SEQUENCE 5 [Carex littledalei]	7.14533	6.04254	5.68097	9.51706	17.0803	26.0131
Ce000034Fg7	hypothetical protein BHE74_00054168 [Ensete ventricosum]	54.8531	36.5779	48.9206	28.4511	32.5182	11.7611		Ce000060Fg39		19.9982	26.8429	13.6447	5.51117	5.08961	2.57017		Ce000137Fg28	EKC/KEOPS complex subunit TPRKB-like isoform X2 [Aegilops tauschii subsp. tauschii]	25.1232	11.5057	9.54976	23.8489	19.6675	11.9277		Ce000074Fg89	hypothetical protein FCM35_KLT05703 [Carex littledalei]	1.87959	0.312288	5.30462	21.6016	38.6542	41.2765
Ce000034Fg79	GEM-like protein 1 [Carex littledalei]	58.973	39.3908	37.2453	23.2751	23.3969	14.1734		Ce000060Fg40	ninja-family protein mc410 [Carex littledalei]	61.3497	77.7505	42.5523	17.0107	14.5165	7.19891		Ce000139Fg105	H/ACA ribonucleoprotein complex non-core subunit NAF1 [Carex littledalei]	5.55243	2.19727	4.81118	16.0563	13.9223	12.6083		Ce000074Fg90	hydroquinone glucosyltransferase [Carex littledalei]	92.1094	19.9083	52.0657	35.5119	70.7844	86.3295
Ce000034Fg99		194.136	122.444	65.962	11.1032	3.94124	6.34088		Ce000060Fg41	regulatory protein NPR3-like protein [Carex littledalei]	45.488	75.8038	58.2254	15.0917	10.1355	6.76344		Ce000139Fg108	hypothetical protein FCM35_KLT02553 [Carex littledalei]	1.75188	1.55197	2.49622	13.9899	11.4285	9.93933		Ce000075Fg7	eukaryotic translation initiation factor 3 subunit F isoform X2 [Carex littledalei]	51.986	44.7842	46.3104	111.342	85.5556	147.065
Ce000035Fg103	BAG family molecular chaperone regulator 4 [Carex littledalei]	17.6437	8.00097	4.62138	0.660578	0.47633	0.118091		Ce000060Fg42	Transmembrane protein 56 [Carex littledalei]	29.3059	37.2242	27.26	12.6922	10.7049	3.92647		Ce000139Fg95	NHL repeat-containing protein 2 [Carex littledalei]	3.21519	2.3885	2.82306	6.70474	4.13008	3.63071		Ce000076Fg101	splicing factor 3B subunit 4 [Carex littledalei]	41.9241	23.0233	28.3289	70.5891	102.671	214.955
Ce000035Fg129	Tubby like protein 7 isoform 2 [Theobroma cacao]	32.5862	30.6088	22.1092	14.2747	15.6109	17.3203		Ce000060Fg6	hypothetical protein FCM35_KLT07663 [Carex littledalei]	10.0544	22.9693	33.4945	10.5707	12.6859	9.46075		Ce000140Fg13	U-box domain-containing protein 4-like protein [Carex littledalei]	11.5083	14.6392	22.9594	31.6331	20.5851	8.68448		Ce000076Fg105	post-GPI attachment to proteins factor 3-like protein [Carex littledalei]	8.12148	3.24492	2.27629	11.1852	22.4928	28.7139
Ce000035Fg144	ubiquitin-conjugating enzyme 35 [Prunus dulcis]	162.155	146.01	139.243	54.6194	40.894	20.0238		Ce000060Fg8	hypothetical protein CK203_027241 [Vitis vinifera]	5.0304	31.6722	26.1726	13.0758	7.97299	11.7776		Ce000140Fg25	hypothetical protein FCM35_KLT15400 [Carex littledalei]	1.8943	9.54021	7.61293	6.28612	13.2106	2.05469		Ce000076Fg109	ataxin-10 [Carex littledalei]	10.2706	9.35854	14.2054	14.4505	16.1194	28.508
Ce000035Fg150	26S proteasome regulatory subunit S10B homolog B isoform X1 [Momordica charantia]	140.797	108.846	88.5734	88.9	82.1015	57.8815		Ce000061Fg10		241.656	363.762	505.686	233.303	230.634	130.315		Ce000140Fg29	DELLA protein GAI-like protein [Carex littledalei]	5.18856	5.02019	18.6214	23.5993	18.9628	8.14383		Ce000076Fg110	2OG-Fe(II) oxygenase superfamily [Carex littledalei]	26.5846	16.1336	20.7884	25.7375	30.1036	58.936
Ce000035Fg153	myb-related protein Hv33-like protein [Carex littledalei]	44.6954	34.418	11.3735	8.39626	9.81585	0.510339		Ce000061Fg11	hypothetical protein FCM35_KLT12493 [Carex littledalei]	129.867	223.519	346.756	102.568	69.2894	37.4181		Ce000140Fg4	oleosin 16 kDa-like [Panicum hallii]	4.42678	7.93107	15.2926	117.849	152.85	103.622		Ce000076Fg44	heat shock 70 kDa protein, mitochondrial-like [Phoenix dactylifera]	39.3222	38.0251	65.382	65.0004	78.7344	120.442
Ce000035Fg157	farnesyl pyrophosphate synthase-like isoform X1 [Carex littledalei]	366.304	130.501	85.7433	24.4753	15.7779	2.94745		Ce000061Fg129	F-box/kelch-repeat protein At1g67480 [Elaeis guineensis]	47.5986	52.1337	62.4081	29.766	22.78	13.4866		Ce000141Fg31	hypothetical protein FCM35_KLT12142 [Carex littledalei]	2.57084	4.84556	3.8406	13.8605	16.7953	6.71612		Ce000076Fg60	zinc finger HIT domain-containing protein 2 isoform X1 [Carex littledalei]	3.1067	2.16858	4.99248	6.36082	7.41353	12.8107
Ce000035Fg167	spastin isoform X3 [Carex littledalei]	33.5945	28.5056	25.5865	12.0547	10.8718	5.44343		Ce000061Fg130	dynamin-related protein 3A-like protein [Carex littledalei]	21.3353	31.0663	26.5583	20.5171	17.1229	10.4199		Ce000141Fg44	uncharacterized protein LOC107415047 [Ziziphus jujuba]	9.29341	9.27087	13.2359	18.2524	20.4205	12.7173		Ce000076Fg66	methyltransferase-like protein 17 [Carex littledalei]	8.62433	6.82964	8.04241	14.679	15.0096	17.6516
Ce000035Fg179	peroxisomal membrane protein 11-5-like protein [Carex littledalei]	86.4024	58.9928	76.0962	68.964	45.7422	30.4499		Ce000061Fg28	WD repeat-containing protein C2A9.03 [Carex littledalei]	34.7983	61.458	114.79	38.703	28.4833	25.0245		Ce000141Fg45	nuclear transcription factor Y subunit A-3-like protein [Carex littledalei]	46.4654	100.72	121.998	170.305	173.422	83.9424		Ce000076Fg73	mitochondrial inner membrane protein OXA1-like protein [Carex littledalei]	4.73473	3.7536	5.12479	11.4575	9.87494	11.781
Ce000035Fg184	E3 ubiquitin ligase BIG BROTHER-like protein [Carex littledalei]	29.3559	24.1295	13.0889	2.31046	0.445796	0.0371343		Ce000061Fg49	nuclear pore complex protein NUP98A isoform X2 [Carex littledalei]	28.0457	44.4652	45.5881	15.2914	13.7283	12.3087		Ce000141Fg48	zinc finger, RING/FYVE/PHD-type, Alfin [Artemisia annua]	12.6851	14.9967	16.7834	23.1038	29.7959	21.3511		Ce000076Fg9	PREDICTED: probable plastid-lipid-associated protein 10, chloroplastic [Musa acuminata subsp. malaccensis]	10.2438	10.3589	11.0098	14.799	15.265	24.0997
Ce000035Fg23	DNA-directed RNA polymerases II and IV subunit 5A-like protein [Carex littledalei]	86.8454	57.4273	49.4222	22.5022	23.8544	11.7266		Ce000061Fg62	prolyl 4-hydroxylase 1 isoform X1 [Carex littledalei]	55.4179	77.736	87.5657	46.2889	33.9663	13.8622		Ce000141Fg8	ninja-family protein 6-like protein [Carex littledalei]	17.8331	28.5784	38.1948	110.527	119.733	85.6341		Ce000076Fg99	Protein-ribulosamine 3-kinase [Carex littledalei]	16.5613	14.1887	19.8373	28.6448	34.3843	38.0008
Ce000035Fg24	chaperonin-like protein [Carex littledalei]	78.6034	44.0849	60.9883	43.6655	53.1851	34.4212		Ce000061Fg83	peptidyl-prolyl isomerase-like isoform X1 [Carex littledalei]	11.587	19.406	28.3712	6.42911	12.2651	21.2107		Ce000141Fg82	pullulanase 1 [Carex littledalei]	3.96497	10.2312	25.6987	79.3106	70.9557	40.3352		Ce000077Fg118	protein SCO1 1 [Carex littledalei]	2.73441	3.17584	5.52636	16.4704	15.1263	16.3197
Ce000035Fg27	ubiquitin-associated domain-containing protein 2-like isoform X1 [Carex littledalei]	24.0694	22.6922	16.9831	9.63316	11.2575	10.352		Ce000061Fg95	chaperone protein dnaJ 20 [Carex littledalei]	41.8954	55.7751	93.1024	30.4292	24.163	13.6857		Ce000142Fg1	importin subunit alpha-1b-like protein [Carex littledalei]	6.51892	7.01289	6.98327	14.5199	10.3142	11.6909		Ce000077Fg20	Vacuolar protein sorting-associated protein 13a [Carex littledalei]	5.14968	2.35917	5.08152	24.0154	32.8695	49.7541
Ce000035Fg28	F-box protein [Carex littledalei]	42.5908	19.5598	26.2459	12.0544	12.9598	10.0358		Ce000062Fg105	unnamed protein product [Triticum turgidum subsp. durum]	15.9575	29.0021	49.5419	24.1621	15.8489	4.56331		Ce000142Fg104	HVA22-like protein e [Carex littledalei]	6.5014	7.17898	32.9225	15.9611	19.7881	15.7551		Ce000077Fg4	flavonol synthase/flavanone 3-hydroxylase-like protein [Carex littledalei]	24.4478	48.3732	48.958	108.816	171.259	233.022
Ce000035Fg45	SNF1-related protein kinase regulatory subunit beta-1-like protein [Carex littledalei]	57.7607	58.1454	44.246	22.8255	16.9369	30.6112		Ce000062Fg109	hypothetical protein FCM35_KLT04489 [Carex littledalei]	103.568	96.1395	90.2381	16.4224	6.34783	0.144291		Ce000142Fg25	uncharacterized protein LOC103721027 [Phoenix dactylifera]	0.9758	0.581156	1.14735	6.24743	5.62201	4.7992		Ce000077Fg81	thymocyte nuclear protein 1 [Carex littledalei]	4.95624	2.82956	3.38625	7.80956	11.2288	14.9752
Ce000035Fg69	hypothetical protein Ahy_A07g034535 isoform A [Arachis hypogaea]	97.7069	65.8615	57.4939	40.4782	41.7452	19.4323		Ce000062Fg137	OTU domain-containing protein [Carex littledalei]	4.43196	15.3594	21.7186	2.70565	3.33598	4.61201		Ce000142Fg60	hypothetical protein Ahy_B06g080585 isoform B [Arachis hypogaea]	4.5918	4.10351	5.59367	11.1977	10.2266	8.33402		Ce000077Fg85	malate dehydrogenase, glyoxysomal [Oryza sativa Japonica Group]	144.692	95.515	114.426	192.054	257.598	358.724
Ce000035Fg70	ABSCISIC ACID-INSENSITIVE 5-like protein 2 [Carex littledalei]	16.8995	9.29624	9.62705	10.519	11.9519	7.5708		Ce000062Fg23	copper-transporting ATPase PAA1 [Carex littledalei]	50.2506	73.5467	28.1226	7.15848	5.70534	5.17889		Ce000142Fg62	protein CHUP1, chloroplastic [Elaeis guineensis]	9.21411	15.271	17.3054	20.243	18.8676	3.27253		Ce000077Fg87	glycine-rich protein [Oryza sativa Japonica Group]	1183.88	983.43	1380.13	4148.25	3357.91	4937.98
Ce000035Fg77	ADP-ribosylation factor GTPase-activating protein AGD14 [Carex littledalei]	39.5952	31.5807	31.5374	24.2807	19.518	13.7968		Ce000062Fg24	copper-transporting ATPase PAA1 [Carex littledalei]	84.5272	111.106	47.8462	12.7536	11.3659	12.3709		Ce000142Fg64	hypothetical protein DKX38_021149 [Salix brachista]	3.80924	4.90332	5.35405	9.981	6.90264	7.47613		Ce000078Fg24	NADP-dependent malic enzyme [Carex littledalei]	0.129543	0.146542	5.04177	335.601	464.787	406.571
Ce000035Fg80	Non-specific lipid transfer protein GPI-anchored 2 [Carex littledalei]	60.3629	17.7776	2.62408	4.99845	1.51741	0.065057		Ce000062Fg37	nitronate monooxygenase [Carex littledalei]	10.7015	114.089	94.1357	7.23363	3.02821	8.72172		Ce000143Fg39	--	5.95022	8.34827	9.00673	14.1203	6.32354	1.52922		Ce000078Fg3	RNA polymerases N/8 kDa subunit [Gossypium australe]	46.6789	35.7149	50.4264	88.585	101.318	128.95
Ce000035Fg88	NADH--cytochrome b5 reductase 1 [Carex littledalei]	173.446	104.902	180.237	71.8029	59.5059	12.3152		Ce000062Fg41	Trihelix transcription factor ASIL2 [Carex littledalei]	45.2626	96.599	92.6446	22.6427	16.7493	13.6254		Ce000144Fg23	abscisic acid 8'-hydroxylase 4 [Carex littledalei]	2.00551	0.359302	0.321289	6.95792	8.13811	3.127		Ce000078Fg34	Succinate dehydrogenase subunit 8A [Carex littledalei]	1.54643	0.809469	3.27589	6.08915	16.2637	26.795
Ce000035Fg95	Protein ESKIMO 1 [Carex littledalei]	19.5969	8.56983	9.27203	10.4907	12.0747	5.35551		Ce000062Fg47	putative 2-aminoethanethiol dioxygenase [Carex littledalei]	20.5544	86.4612	159.358	12.4306	6.66929	0.503883		Ce000145Fg53	zinc finger protein CONSTANS-LIKE 1-like protein [Carex littledalei]	5.29026	5.01163	5.49569	13.0936	17.5241	9.82956		Ce000078Fg58	BTB/POZ domain-containing protein [Carex littledalei]	1.34198	0.543499	1.24304	3.41407	3.72279	7.9675
Ce000035Fg97	clathrin heavy chain 1-like protein [Carex littledalei]	48.4686	48.6905	29.6535	13.828	14.0662	11.1326		Ce000062Fg49	14-3-3-like protein 16R [Carex littledalei]	234.116	252.213	207.775	105.201	48.871	38.7809		Ce000145Fg96	glucose-6-phosphate/phosphate translocator 2 [Carex littledalei]	12.944	15.3444	17.2145	26.3741	27.2743	10.4386		Ce000079Fg120	CAX-interacting protein 4 [Carex littledalei]	17.628	14.4544	16.247	21.8505	21.5631	54.5081
Ce000036Fg106	GPI-anchored protein [Carex littledalei]	25.7293	22.5084	11.9779	11.8108	7.89718	0.241463		Ce000062Fg64	chitinase-like protein 1 [Carex littledalei]	850.285	1111.44	1894.09	682.143	351.435	30.3751		Ce000146Fg14	hypothetical protein FCM35_KLT13023 [Carex littledalei]	8.73764	8.56512	8.70917	30.87	32.3196	18.026		Ce000079Fg31	apyrase 3 [Carex littledalei]	2.60608	9.56794	17.2956	74.9101	212.512	152.75
Ce000036Fg108	uncharacterized protein LOC114163475 [Vigna unguiculata]	22.0836	7.02758	2.91234	4.87774	4.7991	1.70621		Ce000062Fg82	squamosa promoter-binding-like protein 15 [Carex littledalei]	168.448	277.063	250.988	66.0364	44.9439	30.7454		Ce000146Fg81	pyruvate dehydrogenase E1 component subunit beta isoform X1 [Carex littledalei]	16.906	32.305	41.11	137.089	155.042	138.816		Ce000079Fg35	apyrase 3 [Carex littledalei]	0	0	0.006984	0.125675	6.57525	6.0892
Ce000036Fg111	Transmembrane protein 256 [Carex littledalei]	13.8043	4.73672	4.94369	7.90276	5.64462	9.70002		Ce000062Fg83	Proton pump-interactor 1 [Carex littledalei]	101.471	114.757	80.2121	38.1132	23.8692	25.3173		Ce000147Fg49	alcohol dehydrogenase 1-like protein [Carex littledalei]	4.50465	0.934462	0.195503	4.85066	9.34072	3.79025		Ce000079Fg84	Late embryogenesis abundant protein 18 [Carex littledalei]	0.579409	0.833099	1.15033	1.85627	25.1617	67.1252
Ce000036Fg114	Lipopolysaccharide core [Carex littledalei]	19.151	13.7764	10.9699	10.8687	11.1652	6.01274		Ce000062Fg90	3-hydroxy-3-methylglutaryl-coenzyme A reductase [Carex littledalei]	540.917	1285.82	983.868	271.491	186.063	87.4404		Ce000147Fg50	hypothetical protein FCM35_KLT07173 [Carex littledalei]	3.63316	4.10734	6.15984	16.9264	11.4329	12.6033		Ce000080Fg107	protein-lysine N-methyltransferase N6AMT2 [Carex littledalei]	9.05525	5.41502	5.9902	12.0015	17.6039	20.4927
Ce000036Fg23	putative protein phosphatase 2C 64-like protein [Carex littledalei]	20.7571	22.4084	15.4428	9.86223	5.79251	1.83894		Ce000062Fg98	Vacuolar protein sorting-associated protein 26A [Zea mays]	61.1461	70.657	61.8672	43.899	37.7123	17.4662		Ce000147Fg51	hypothetical protein FCM35_KLT07173 [Carex littledalei]	5.86155	9.86472	9.11052	14.5242	10.8136	8.13577		Ce000080Fg88	YTH domain-containing family protein 2-like protein [Carex littledalei]	386.515	238.547	283.26	1625.68	1696.54	3583.24
Ce000036Fg40	protein STRUBBELIG-RECEPTOR FAMILY 3 isoform X10 [Carex littledalei]	41.4753	31.239	32.4485	12.9647	8.1413	3.22273		Ce000063Fg100	hypothetical protein FCM35_KLT06979 [Carex littledalei]	25.0171	89.9257	73.9207	67.5653	65.4239	42.2097		Ce000147Fg69	hypothetical protein FCM35_KLT07158 [Carex littledalei]	2.44283	0.258297	1.3973	6.3238	7.56844	2.67389		Ce000080Fg97	cytosolic Fe-S cluster assembly factor narfl-like isoform X2 [Carex littledalei]	12.9621	7.73397	10.8907	13.0175	14.8947	37.7966
Ce000036Fg45	brefeldin A-inhibited guanine nucleotide-exchange protein 5 isoform X2 [Carex littledalei]	64.1205	63.3228	32.2034	16.7098	12.0168	14.1265		Ce000063Fg122	putative methyltransferase [Carex littledalei]	9.03395	25.5628	19.8792	1.26872	0.665145	1.34253		Ce000147Fg70	hypothetical protein FCM35_KLT07158 [Carex littledalei]	2.85932	0.52671	2.04596	8.7514	12.5893	7.3354		Ce000081Fg7	auxin-repressed protein-like protein [Carex littledalei]	131.268	82.1453	206.221	604.106	618.896	937.823
Ce000036Fg48	secretory carrier-associated membrane protein 2-like protein [Carex littledalei]	152.155	151.933	133.487	78.6767	72.329	89.602		Ce000063Fg124	putative choline kinase 1 [Hibiscus syriacus]	298.936	445.47	195.206	20.5363	12.7738	5.7822		Ce000148Fg108	Alpha/beta hydrolase domain-containing protein 11 [Carex littledalei]	6.67357	14.9141	21.1566	47.8047	43.1027	19.6794		Ce000082Fg86	adenylate kinase isoenzyme 6 [Carex littledalei]	14.0301	6.45028	7.33743	11.82	12.211	12.1073
Ce000036Fg64	ADP-ribosylation factor GTPase-activating protein AGD5 [Carex littledalei]	76.6701	52.5841	41.3466	19.2327	16.4245	9.0314		Ce000063Fg40_Ce000063Fg41	sericin 1-like protein [Carex littledalei]	15.6272	27.1349	26.9851	9.05078	7.15531	3.65952		Ce000148Fg72	hypothetical protein FCM35_KLT04723 [Carex littledalei]	5.77298	3.40158	15.2759	18.1295	21.6285	20.7507		Ce000083Fg10	protein KRI1 [Carex littledalei]	17.2921	7.92287	10.8354	31.9171	25.9827	38.8721
Ce000036Fg71	sphingosine kinase 1-like isoform X1 [Carex littledalei]	27.3529	14.1348	11.1618	11.0983	8.10923	4.9159		Ce000063Fg54	Casein Kinase-1 Like Protein [Carex littledalei]	185.271	204.15	162.994	121.929	103.364	66.9362		Ce000148Fg9	PREDICTED: DNA repair protein recA homolog 1, chloroplastic isoform X4 [Musa acuminata subsp. malaccensis]	2.61392	3.95871	4.65338	5.82582	5.32011	1.93853		Ce000083Fg115	UDP-glycosyltransferase 92A1-like protein [Carex littledalei]	2.40241	1.99442	3.17951	6.0912	5.23142	6.9051
Ce000036Fg81	Sugar carrier protein C [Ananas comosus]	890.71	804.644	216.542	29.5306	11.8134	5.90497		Ce000063Fg6	arginyl-tRNA--protein transferase 2-like protein [Carex littledalei]	35.5581	37.5332	42.9482	18.2418	16.3215	12.7959		Ce000148Fg91	hypothetical protein FCM35_KLT04711 [Carex littledalei]	24.4886	54.0028	93.0056	129.298	112.598	54.3426		Ce000083Fg116	tetratricopeptide repeat protein 27 homolog [Elaeis guineensis]	16.8364	9.9731	12.0012	33.2845	31.8396	33.6224
Ce000036Fg95	Wound-induced protein [Carex littledalei]	280.898	109.45	103.739	85.8859	93.475	61.4723		Ce000063Fg60	hypothetical protein EJB05_36636 [Eragrostis curvula]	5.54786	14.4007	13.4763	6.12937	5.1873	1.43657		Ce000149Fg36	hypothetical protein DKX38_011498 [Salix brachista]	3.4636	19.5	27.4036	28.1974	24.8421	10.0956		Ce000083Fg123	hypothetical protein FCM35_KLT20109 [Carex littledalei]	9.57942	9.75949	9.21216	21.4484	23.4372	31.5727
Ce000037Fg108	Urease accessory protein UreH [Carex littledalei]	19.5753	12.9299	8.54837	7.83183	6.88411	7.55131		Ce000063Fg72	receptor-like serine/threonine-protein kinase ALE2 [Carex littledalei]	22.3389	27.4712	16.4319	6.46346	3.6786	3.50461		Ce000150Fg44	calcyclin-binding protein [Rosa chinensis]	7.96854	16.2662	42.2359	34.8046	56.3183	43.2649		Ce000083Fg33	sterol 3-beta-glucosyltransferase UGT80A2 isoform X2 [Carex littledalei]	58.8981	61.3847	63.3655	95.3056	98.5312	241.101
Ce000037Fg148	bifunctional epoxide hydrolase 2-like protein [Carex littledalei]	109.556	34.7021	6.54246	0.503252	0.920223	0.288946		Ce000063Fg74	Cotton fiber expressed protein [Carex littledalei]	36.4325	82.6048	36.9228	8.81772	4.7136	4.15552		Ce000150Fg66	hypothetical protein FCM35_KLT13726 [Carex littledalei]	0	1.78616	6.25045	8.44073	10.1742	9.17703		Ce000083Fg43	Retrovirus-related Pol polyprotein LINE-1 [Zea mays]	3.79635	1.82315	1.98542	4.9686	5.1595	8.85175
Ce000037Fg160	hypothetical protein CUMW_019900 [Citrus unshiu]	47.2659	47.9621	40.2849	30.2804	22.6479	19.9321		Ce000063Fg79	Phospholipase A1-II 5 [Carex littledalei]	3.7998	7.62984	5.81393	1.91503	1.58505	1.67667		Ce000151Fg39	ATP-dependent Clp protease proteolytic subunit 6 [Carex littledalei]	7.89113	10.0893	10.9807	20.6055	18.8585	14.2214		Ce000083Fg6	uncharacterized protein LOC109728471 isoform X3 [Ananas comosus]	12.6429	12.8131	12.9076	24.1045	27.2734	29.2652
Ce000037Fg177	CW-type Zinc Finger [Carex littledalei]	30.7995	23.387	18.5161	12.3289	12.975	9.33786		Ce000064Fg119	ADP-ribosylation factor [Carex littledalei]	38.9554	27.6643	43.9492	15.1016	12.8544	4.78754		Ce000151Fg43	nuclear transcription factor Y subunit A-3-like protein [Carex littledalei]	51.1616	103.103	121.952	143.93	146.825	82.672		Ce000083Fg73	plasma membrane associated protein [Carex littledalei]	8.55456	2.30613	8.92527	163.354	168.472	289.982
Ce000037Fg25	ubiquitin-conjugating enzyme E2 4 [Elaeis guineensis]	19.2956	11.2464	13.2884	9.25319	8.30749	5.41766		Ce000064Fg30	tubulin beta chain-like [Coffea arabica]	299.697	381.267	234.792	18.5641	12.5964	12.4928		Ce000151Fg46	zinc finger, RING/FYVE/PHD-type, Alfin [Artemisia annua]	12.9399	15.4137	17.4923	23.809	30.5098	21.8727		Ce000083Fg74	plasma membrane associated protein [Carex littledalei]	61.2184	15.1011	62.0135	1021.88	1163.37	2121.61
Ce000037Fg34	hypothetical protein E2562_024638 [Oryza meyeriana var. granulata]	126.877	129.738	104.09	64.917	56.0901	41.7907		Ce000064Fg62	protein notum [Carex littledalei]	62.6712	281.979	269.936	31.4246	6.51668	0.0286677		Ce000151Fg79	pullulanase 1 [Carex littledalei]	6.3822	23.4836	66.4561	161.931	130.69	72.8276		Ce000083Fg77	photosystem I reaction center subunit IV A [Zea mays]	4.01204	1.30516	3.28925	20.4629	17.1232	24.6834
Ce000037Fg52	protein GDAP2 [Carex littledalei]	45.0978	48.3058	36.413	31.8959	23.8457	19.7557		Ce000064Fg66	rop guanine nucleotide exchange factor 14 [Carex littledalei]	17.1188	46.4085	37.0243	6.19238	2.30672	0.282075		Ce000152Fg25	Ethylene receptor [Carex littledalei]	0.0932207	1.06393	37.4282	305.612	296.165	99.9194		Ce000084Fg41	chaperone protein ClpB3 [Carex littledalei]	16.4905	18.901	37.2516	22.3459	30.4498	50.5869
Ce000037Fg67	ras-related protein RABF1 [Carex littledalei]	42.9892	37.6305	30.448	21.2002	19.0931	13.6905		Ce000065Fg23	cyclin-dependent kinase inhibitor 1-like protein [Carex littledalei]	3.37289	11.1207	15.1571	13.1082	9.74147	2.91416		Ce000152Fg90	hypothetical protein DAI22_04g220500 [Oryza sativa Japonica Group]	144.666	182.251	244.7	378.596	262.075	125.371		Ce000084Fg57	hypothetical protein FCM35_KLT04939 [Carex littledalei]	2.29812	1.72196	8.36333	232.152	448.047	612.467
Ce000037Fg74	WAT1-related protein [Carex littledalei]	34.3835	18.1575	13.6596	14.8276	31.318	7.59154		Ce000065Fg56	Remorin, C-terminal region [Carex littledalei]	15.3962	34.0766	21.2509	11.8407	4.64126	0.152291		Ce000153Fg70	N utilization substance protein B [Carex littledalei]	2.32442	3.7845	4.81431	6.99286	8.18246	4.08063		Ce000084Fg64	Serine carboxypeptidase-like 2 [Carex littledalei]	5.29677	3.61168	3.78031	7.38251	6.09731	13.0869
Ce000038Fg120	glycerol-3-phosphate 2-O-acyltransferase 6-like protein [Carex littledalei]	12.781	7.11822	7.23114	5.70006	4.02275	3.3436		Ce000065Fg96	tyrosine-protein phosphatase DSP1-like isoform X1 [Juglans regia]	25.5485	52.9134	54.4641	13.3325	3.85827	0.253848		Ce000154Fg35	GTP-binding protein [Carex littledalei]	6.55557	5.46305	8.1896	17.8181	19.3931	10.4129		Ce000084Fg69	hydrophobic protein [Carex littledalei]	9.02364	9.90227	9.80963	22.2237	27.3924	41.6526
Ce000038Fg125	N-acetyl-D-glucosamine kinase-like protein [Carex littledalei]	17.6594	11.7949	8.79835	6.24747	4.32693	2.75496		Ce000065Fg98	glucan endo-1,3-beta-glucosidase 13 [Carex littledalei]	63.5082	112.641	48.9625	39.1908	18.2227	2.77644		Ce000154Fg51	glyceraldehyde-3-phosphate dehydrogenase 2, cytosolic isoform X1 [Populus alba]	1308.15	2073.84	3389.33	3741.88	3600.17	1850.32		Ce000084Fg71	DNA-directed RNA polymerase 3B [Carex littledalei]	13.9591	15.3176	16.7672	23.3452	21.8331	29.3866
Ce000038Fg127	60S acidic ribosomal protein P0-like protein [Carex littledalei]	122.252	44.2186	36.9613	82.723	63.3394	61.0041		Ce000066Fg106	mitogen-activated protein kinase 8-like isoform X1 [Carex littledalei]	307.987	657.616	591.727	157.481	111.978	57.5103		Ce000154Fg66		5.16841	3.81863	5.21984	11.6105	8.46136	8.61908		Ce000084Fg78	F-box protein [Carex littledalei]	1.26206	0.222558	0	0.865884	2.27661	6.92104
Ce000038Fg134	peroxisome biogenesis protein 1 isoform X1 [Carex littledalei]	20.5363	16.4536	11.7401	11.0059	9.12661	9.026		Ce000066Fg12	DEAD-box ATP-dependent RNA helicase 35-like protein [Carex littledalei]	25.7257	29.4714	30.7257	20.7286	21.5286	11.7591		Ce000154Fg99	peptide methionine sulfoxide reductase-like protein [Carex littledalei]	35.3784	35.3123	34.5592	139.806	120.095	55.4922		Ce000085Fg100	hypothetical protein FCM35_KLT05527 [Carex littledalei]	7.00307	4.16291	4.20783	8.0861	7.38618	19.2307
Ce000038Fg136	2-oxoisovalerate dehydrogenase subunit alpha 2 [Carex littledalei]	28.0254	19.4121	18.4214	18.3959	13.7607	8.64372		Ce000066Fg131	mannan endo-1,4-beta-mannosidase 1-like protein [Carex littledalei]	35.0368	118.774	68.3559	9.77926	2.4589	0.0134023		Ce000155Fg28	acyl-[acyl-carrier-protein] desaturase [Carex littledalei]	252.744	329.6	429.31	617.019	813.67	245.075		Ce000085Fg50	--	22.4458	19.7853	70.2215	29.7343	63.0982	92.8009
Ce000038Fg150	GDP-L-galactose phosphorylase 1-like protein [Carex littledalei]	150.288	29.9104	29.1292	10.0013	11.6707	8.20502		Ce000066Fg42	hypothetical protein FCM35_KLT00254 [Carex littledalei]	84.4661	111.887	122	69.1114	56.0216	17.4542		Ce000157Fg45	BTB/POZ domain-containing protein [Carex littledalei]	1.85359	4.06596	5.22409	6.33694	6.64907	3.97674		Ce000085Fg57	hypothetical protein C3L33_14308, partial [Rhododendron williamsianum]	19.8904	9.7328	11.8295	13.0491	14.0424	17.4303
Ce000038Fg31	putative receptor-like protein kinase [Carex littledalei]	27.0198	29.912	20.1802	11.6585	13.8149	6.34454		Ce000066Fg45	methionyl-tRNA formyltransferase [Carex littledalei]	5.32212	10.6804	11.6256	7.44711	6.91382	7.96917		Ce000157Fg81	hypothetical protein FCM35_KLT20940 [Carex littledalei]	3.00085	1.63869	2.72963	8.38827	7.85038	7.02542		Ce000085Fg62	DEAD-box ATP-dependent RNA helicase 27-like protein [Carex littledalei]	26.5328	12.5875	16.6876	31.2974	25.2048	49.4146
Ce000038Fg46	Protein involved in positive regulation of both 1,3-beta-glucan synthesis and the Pkc1p-MAPK pathway [Carex littledalei]	211.958	79.6753	50.3348	8.88183	6.36234	3.38663		Ce000066Fg55	hypothetical protein FCM35_KLT21341 [Carex littledalei]	413.478	430.36	455.997	78.5469	67.1818	18.7999		Ce000159Fg3	PREDICTED: uncharacterized protein LOC105951353 [Erythranthe guttata]	1.64526	0.782641	1.95449	7.00966	9.72958	6.8189		Ce000085Fg84	hypothetical protein DY000_02028549 [Brassica cretica]	49.3463	48.3904	42.7538	128.2	117.384	159.33
Ce000038Fg47	carboxy-terminal domain RNA polymerase II polypeptide A small phosphatase 1-like isoform X1 [Carex littledalei]	16.8202	7.84659	5.97536	3.10734	2.917	2.01668		Ce000066Fg66		3.52344	7.48747	6.10632	1.49927	0.636224	0		Ce000159Fg30	Core-2/I-Branching enzyme [Carex littledalei]	5.13548	2.80409	3.32461	13.8747	15.676	10.4378		Ce000086Fg1	GDP-fucose protein O-fucosyltransferase [Carex littledalei]	0.456349	0.933306	1.21007	25.0855	19.8108	53.6973
Ce000038Fg48	Cytochrome b5 domain-containing protein RLF [Carex littledalei]	15.279	8.61309	6.20383	3.72191	5.503	2.49845		Ce000067Fg64	UDP-galactose transporter 2 isoform X1 [Carex littledalei]	77.4117	98.7257	65.4759	25.1313	17.9541	13.5435		Ce000159Fg59	probable carboxylesterase 15 [Phoenix dactylifera]	16.5602	39.7843	93.9675	139.552	199.535	69.2703		Ce000087Fg123	hypothetical protein FCM35_KLT13488 [Carex littledalei]	2.04929	3.83068	4.22878	5.88828	5.63866	6.58179
Ce000038Fg7	hypothetical protein FCM35_KLT03938 [Carex littledalei]	14.3218	11.6579	10.8425	6.66821	7.65293	6.7149		Ce000067Fg74	hypothetical protein FCM35_KLT02382 [Carex littledalei]	12.7789	26.3999	18.7792	6.82758	9.11091	8.72446		Ce000160Fg49	ATPase family associated with various cellular activities (AAA) [Carex littledalei]	4.11568	6.80919	5.97945	10.9148	11.4305	7.56789		Ce000087Fg125		0	0.0360867	0	10.5668	21.6516	83.5192
Ce000039Fg108	proline-rich receptor-like protein kinase PERK1 [Carex littledalei]	25.1075	24.2431	11.6963	6.10584	5.16918	2.50675		Ce000067Fg8	paired amphipathic helix protein Sin3-like 3 [Carex littledalei]	17.0086	36.9779	34.2157	34.9247	33.0288	11.5591		Ce000160Fg83	protein NRT1/PTR FAMILY 4.3 isoform X1 [Carex littledalei]	8.43624	19.5583	27.5051	74.0314	76.8353	20.9907		Ce000087Fg20	Homeobox-leucine zipper protein ATHB-7 [Glycine soja]	12.686	8.3918	6.79315	65.7046	121.918	295.841
Ce000039Fg136	Post-GPI attachment to proteins factor 3 [Carex littledalei]	20.4184	19.2626	12.3483	5.92203	5.40512	2.88485		Ce000068Fg102	hypothetical protein FCM35_KLT16106 [Carex littledalei]	0.353396	13.8616	6.2912	0.0706753	0.0866403	0.263012		Ce000160Fg84		0.882177	3.65241	3.61053	7.30918	11.1633	4.41869		Ce000087Fg50	elongation factor G-2 [Carex littledalei]	3.97964	5.1233	7.95823	16.4062	18.3901	19.2791
Ce000039Fg141	cellulose synthase-like protein G3 [Panicum miliaceum]	24.1997	12.8643	8.76742	8.27643	5.92679	3.95081		Ce000068Fg103	hypothetical protein FCM35_KLT16106 [Carex littledalei]	1.15337	16.6303	7.57709	0.299009	0.220109	0.213851		Ce000162Fg15	polyadenylate-binding protein-interacting protein 8-like protein [Carex littledalei]	46.1553	101.582	61.9767	94.691	89.8326	86.9886		Ce000087Fg53	vacuolar-processing enzyme beta-isozyme-like protein [Carex littledalei]	5.30248	4.1533	3.51904	11.3007	26.4416	56.0347
Ce000039Fg156	plant intracellular Ras-group-related LRR protein 7 [Brachypodium distachyon]	17.7785	9.60957	7.17506	5.90649	5.24982	5.52942		Ce000068Fg104	hypothetical protein FCM35_KLT16106 [Carex littledalei]	5.58622	36.6612	13.7298	1.57971	0.324721	0.360797		Ce000162Fg83	putative inactive dual specificity protein phosphatase-like protein [Carex littledalei]	8.08223	6.9974	9.16928	15.4747	16.7092	14.981		Ce000087Fg6	mitochondrial import inner membrane translocase subunit TIM23-1-like protein [Carex littledalei]	19.2231	16.4562	23.6335	40.6231	37.6547	72.8922
Ce000039Fg25	acyl-protein thioesterase 2-like protein [Carex littledalei]	46.822	46.1008	27.835	15.1862	12.2923	7.76711		Ce000068Fg21	vesicle-associated protein 2-1 isoform X2 [Carex littledalei]	14.0507	28.2172	22.1181	17.5672	20.6578	5.77793		Ce000162Fg88	hypothetical protein FCM35_KLT00963 [Carex littledalei]	3.38366	3.9912	4.98571	19.1424	31.9404	8.90801		Ce000087Fg91	uncharacterized protein LOC109707918 [Ananas comosus]	13.3456	8.74773	5.64715	6.86028	10.8654	14.9442
Ce000039Fg29	NADH-cytochrome b5 reductase-like protein isoform X2 [Dendrobium catenatum]	24.5295	18.2055	14.6043	10.7234	11.8997	8.05334		Ce000068Fg29	phospholipase A1-Ibeta2 [Carex littledalei]	59.9684	122.602	115.633	34.8993	15.6331	11.6727		Ce000163Fg1	unnamed protein product [Triticum turgidum subsp. durum]	6.35217	3.6456	9.25827	19.9702	17.0367	17.6227		Ce000087Fg98	monothiol glutaredoxin-S11-like protein [Carex littledalei]	0.12906	0.105028	0.132989	0.437224	2.98242	21.769
Ce000039Fg30	conserved oligomeric Golgi complex subunit 2-like protein [Carex littledalei]	16.9334	14.2228	12.4126	9.18846	9.1732	7.0544		Ce000068Fg36	ethylene-responsive transcription factor 2-like protein [Carex littledalei]	457.405	425.873	492.408	121.337	104.875	80.0137		Ce000163Fg2	translin-like protein [Carex littledalei]	3.33347	2.18293	4.62381	9.88925	6.53059	4.51653		Ce000088Fg77	unnamed protein product [Digitaria exilis]	7.49491	4.38528	6.09361	9.2441	14.3192	16.5179
Ce000039Fg53	unnamed protein product [Digitaria exilis]	145.546	129.087	64.0205	30.4297	18.8309	6.9561		Ce000068Fg40	nudix hydrolase 8-like protein [Carex littledalei]	62.9304	74.36	50.4101	42.0775	25.3071	16.1598		Ce000163Fg4	hypothetical protein FCM35_KLT06817 [Carex littledalei]	2.77561	3.97333	3.22749	6.57663	10.284	2.48502		Ce000089Fg40	SURP and G-patch domain-containing protein 1-like protein [Carex littledalei]	2.57516	5.73049	4.07401	15.5193	4.35094	13.5362
Ce000039Fg54	Glyoxalase/Bleomycin resistance protein/Dioxygenase superfamily [Carex littledalei]	122.472	84.1302	13.5049	2.332	0.725839	0.182837		Ce000068Fg48	Cotton fiber expressed protein [Carex littledalei]	6.70856	18.2047	20.4653	6.03652	4.16747	2.34255		Ce000163Fg5	UDP-glycosyltransferase 86A1 [Carex littledalei]	0.0333877	0.603967	6.25089	39.1217	42.3108	31.8719		Ce000089Fg70	U3 small nucleolar RNA-associated protein 6 [Carex littledalei]	10.9958	5.30288	6.64079	14.4284	11.8588	25.3912
Ce000040Fg103	histone H2B.11 [Oryza sativa Japonica Group]	48.7577	16.8598	9.43092	6.22743	6.85594	3.64431		Ce000068Fg49	Homeobox-leucine zipper protein HAT2 [Carex littledalei]	65.5339	231.244	144.158	47.0607	46.5702	22.1694		Ce000163Fg80	enhancer of rudimentary isoform X1 [Carex littledalei]	6.88334	4.3829	7.08427	14.5423	12.7681	8.23334		Ce000089Fg86		1.61948	2.96991	3.18758	4.1445	3.46791	7.81365
Ce000040Fg109	hypothetical protein FCM35_KLT09896 [Carex littledalei]	21.7569	22.9605	15.5738	7.81149	6.44378	3.11839		Ce000068Fg52	anaphase-promoting complex subunit 8 [Carex littledalei]	14.9222	29.184	36.5091	10.0734	6.60163	3.12482		Ce000164Fg16	serpin-ZXA-like protein [Carex littledalei]	1.29859	1.73454	6.13704	24.2543	31.0434	6.83158		Ce000089Fg88		3.94239	18.7432	11.2014	19.9222	6.56219	29.5128
Ce000040Fg134	monodehydroascorbate reductase [Carex littledalei]	207.14	162.788	140.98	41.0378	35.386	33.741		Ce000068Fg65	polyprenol reductase 1 isoform X1 [Carex littledalei]	42.2766	39.4817	64.4046	24.4491	24.7944	17.1304		Ce000164Fg40	metal tolerance protein 4-like protein [Carex littledalei]	2.95242	6.71603	13.7521	38.7745	54.5992	29.7548		Ce000089Fg89		2.89791	18.1901	13.725	20.7509	8.20815	34.3669
Ce000040Fg2	putative VAMP-like protein [Carex littledalei]	17.9488	13.1709	10.8025	8.07094	6.53971	6.4974		Ce000068Fg77	lipid transfer-like protein VAS [Ananas comosus]	19.8746	35.3145	19.8218	11.0603	9.59225	3.85888		Ce000164Fg5	magnesium-chelatase subunit ChlI [Carex littledalei]	4.26054	8.41793	7.23464	12.5236	8.90404	8.24676		Ce000090Fg3	delta(3,5)-Delta(2,4)-dienoyl-CoA isomerase [Carex littledalei]	6.76479	7.49116	7.6114	11.7514	11.3398	22.0196
Ce000040Fg58	hypothetical protein FCM35_KLT09860 [Carex littledalei]	47.4458	31.0887	18.9804	10.8813	12.7354	7.24911		Ce000068Fg91	hypothetical protein C4D60_Mb05t05140 [Musa balbisiana]	104.573	112.126	81.0839	20.4128	13.743	6.38502		Ce000165Fg39	hypothetical protein FCM35_KLT07173 [Carex littledalei]	2.34785	2.60996	4.79311	12.8741	9.09281	7.50007		Ce000090Fg4	hypothetical protein FCM35_KLT02886 [Carex littledalei]	5.63842	2.67483	3.18882	11.4758	12.9307	16.7566
Ce000040Fg69	hypothetical protein FCM35_KLT09867 [Carex littledalei]	241.021	1.54575	3.32944	4.88125	10.4474	8.45539		Ce000068Fg97	E3 ubiquitin-protein ligase RHA1B-like protein [Carex littledalei]	17.4615	48.3397	12.6714	0.576241	0.31398	0.0600477		Ce000165Fg40	hypothetical protein FCM35_KLT07173 [Carex littledalei]	4.19409	7.56377	8.63627	11.6762	8.81639	9.10512		Ce000091Fg10	30S ribosomal protein S1, chloroplast precursor [Carex littledalei]	5.61899	5.08402	6.12232	9.56191	10.7598	14.3579
Ce000040Fg70	Mitochondrial ATPase inhibitor, IATP [Carex littledalei]	116.846	69.7518	68.7647	77.4731	81.9497	44.7192		Ce000069Fg106	putative glutamyl endopeptidase [Carex littledalei]	26.5144	51.2627	37.0342	18.1437	8.91874	3.04512		Ce000165Fg58_Ce000165Fg59	hypothetical protein FCM35_KLT07158 [Carex littledalei]	2.21974	0.582318	1.92307	6.38548	9.33051	5.67187		Ce000091Fg113	dnaJ subfamily B member 7-like isoform X1 [Carex littledalei]	29.8658	48.5818	44.7291	104.066	104.63	139.884
Ce000040Fg73	putative histone H4, histone-fold, CENP-T/Histone H4, histone [Helianthus annuus]	31.4995	15.1121	9.42759	5.43636	7.63905	3.45429		Ce000069Fg110	ocs element-binding factor 1-like protein [Carex littledalei]	224.75	698.452	597.647	178.674	97.9855	98.0451		Ce000166Fg27	formimidoyltransferase-cyclodeaminase [Carex littledalei]	7.06456	31.388	24.8351	49.8737	56.5826	21.8725		Ce000091Fg54	seed maturation protein PM36 [Carex littledalei]	7.54414	4.45359	7.30231	15.2259	17.8376	26.0803
Ce000040Fg76	vesicle-associated membrane protein 727 [Carex littledalei]	21.4869	10.9615	12.7072	16.0308	14.055	10.1782		Ce000069Fg126	Universal stress protein A-like protein [Actinidia chinensis var. chinensis]	192.345	514.653	693.782	402.156	155.028	135.804		Ce000166Fg84	hypothetical protein EZV62_008148 [Acer yangbiense]	12.1065	8.98595	9.8789	17.8201	28.0294	17.7199		Ce000091Fg55	Calvin cycle protein CP12-1 [Carex littledalei]	19.3908	4.08225	5.93614	42.906	13.1684	35.9279
Ce000041Fg104		69.2245	39.319	32.953	43.1855	38.5617	29.5842		Ce000069Fg36	Calmodulin-binding protein 25 [Carex littledalei]	4.39472	7.94956	9.11191	4.45107	5.35935	2.04614		Ce000167Fg32	protein HEADING DATE REPRESSOR 1 [Arachis duranensis]	9.72208	18.2999	16.6679	12.1329	27.5894	19.0938		Ce000091Fg65	DNA-directed RNA polymerases II, IV and V subunit 9A [Carex littledalei]	0.260117	0.0110363	0.443432	7.38718	16.3827	67.55
Ce000041Fg110	endoplasmic reticulum metallopeptidase 1 [Carex littledalei]	29.5339	19.5648	15.835	13.2728	12.2619	6.71922		Ce000069Fg45	magnesium-protoporphyrin IX monomethyl ester [Carex littledalei]	10.8731	29.8036	64.4448	16.8299	7.00997	1.24819		Ce000167Fg37	Glutathione peroxidase [Corchorus capsularis]	2.34926	4.91149	9.51101	13.0545	11.1765	10.6187		Ce000091Fg73		19.3648	21.1949	27.2767	92.4242	76.5221	394.635
Ce000041Fg25	scopoletin glucosyltransferase-like [Elaeis guineensis]	26.2122	6.47889	0.570295	0.0667043	0.023022	0		Ce000069Fg47	CBL-interacting protein kinase 32 isoform X3 [Carex littledalei]	25.8779	21.1927	30.7979	29.976	18.8638	10.9002		Ce000168Fg106	copper transport protein ATX1 isoform X3 [Dendrobium catenatum]	1.67135	1.41501	7.5532	23.8398	26.608	13.6589		Ce000092Fg42	polcalcin Syr v 3-like protein [Carex littledalei]	7.70786	3.78906	16.9964	13.7824	15.3672	38.1388
Ce000041Fg27	Sieve element occlusion N-terminus [Carex littledalei]	57.6931	8.78761	1.04946	0.056807	0.045496	0		Ce000069Fg52	SNF1-related protein kinase regulatory subunit beta-1-like protein [Carex littledalei]	2.70573	9.87835	9.1522	1.01144	0.436003	0.108059		Ce000168Fg21	50S ribosomal protein L17 [Carex littledalei]	18.1399	28.9481	27.456	37.6988	34.8802	16.1738		Ce000092Fg78	mitochondrial outer membrane protein porin 1-like protein [Carex littledalei]	0.452849	0.301433	0.865152	2.81851	5.26718	16.8489
Ce000041Fg55	putative acyl-activating enzyme 16 [Carex littledalei]	26.0907	26.9815	16.1124	9.7555	8.99521	13.9378		Ce000069Fg53	SNF1-related protein kinase regulatory subunit beta-1-like protein [Carex littledalei]	4.53947	17.7074	20.2597	2.28403	1.82152	0.109216		Ce000169Fg30	hypothetical protein FCM35_KLT14838 [Carex littledalei]	25.7075	28.3575	50.6148	59.7947	38.4396	40.3088		Ce000093Fg41	phosphoribosylaminoimidazole-succinocarboxamide synthase, chloroplastic isoform X1 [Elaeis guineensis]	10.2056	6.62473	8.00515	22.934	23.9194	30.1208
Ce000041Fg67	pirin-like protein isoform X4 [Carex littledalei]	60.5211	48.1215	27.8478	8.79521	9.1678	6.35846		Ce000069Fg54	PHD and RING finger domain-containing protein 1 [Carex littledalei]	83.5543	139.113	171.908	36.0197	24.6182	15.0514		Ce000169Fg41	protein CURVATURE THYLAKOID 1D [Carex littledalei]	19.6056	32.5911	38.7745	44.249	46.3439	24.0749		Ce000093Fg42	alanine aminotransferase 2 [Carex littledalei]	0.10321	0.224271	4.44631	48.1795	153.821	229.129
Ce000041Fg74	putative cinnamyl alcohol dehydrogenase [Carex littledalei]	138.999	21.1197	51.9384	36.1423	31.0467	21.3753		Ce000069Fg55	SNF1-related protein kinase regulatory subunit beta-1-like protein [Carex littledalei]	27.8531	46.5271	42.7201	14.0676	10.7811	5.0781		Ce000169Fg72	1,4-alpha-glucan-branching enzyme, partial [Eleocharis dulcis]	31.6579	170.436	160.744	196.345	186.715	92.6739		Ce000093Fg51	Embryogenesis-associated protein EMB8 [Carex littledalei]	3.28587	2.99761	4.72215	6.92138	6.68665	8.70178
Ce000042Fg113	plasma membrane H+-transporting ATPase-like protein [Carex littledalei]	99.2555	34.6097	24.1694	45.8101	35.9833	13.3505		Ce000069Fg58	sigma factor binding protein 1 [Carex littledalei]	14.1355	34.6307	27.5369	2.20212	1.88476	1.08792		Ce000169Fg82	hypothetical protein FCM35_KLT14892 [Carex littledalei]	0.630135	80.662	69.5621	118.617	104.931	62.8279		Ce000093Fg71	GDSL esterase/lipase CPRD49-like isoform X2 [Carex littledalei]	7.16415	8.44937	9.62894	14.2706	19.2522	20.4517
Ce000042Fg128	NADPH--cytochrome P450 reductase-like protein [Carex littledalei]	41.6856	30.2142	23.2651	25.8818	19.2369	13.2254		Ce000069Fg74	CAS1 domain-containing protein 1-like protein [Carex littledalei]	26.3057	50.2285	24.7782	14.4518	8.30146	4.0452		Ce000169Fg83	hypothetical protein FCM35_KLT14891 [Carex littledalei]	4.7157	6.10962	11.2356	13.8942	11.7845	9.71305		Ce000093Fg79	auxin-repressed protein-like protein [Carex littledalei]	37.9121	18.4678	20.8891	29.4438	26.2063	58.7557
Ce000042Fg134	protein TIFY 3B-like protein [Carex littledalei]	207.405	160.413	97.4722	44.3815	36.6344	18.3594		Ce000069Fg76	F-box/LRR-repeat protein [Carex littledalei]	17.6659	78.0532	144.627	16.2814	5.59656	1.58667		Ce000169Fg90	poly [Carex littledalei]	10.3421	2.10545	18.2141	44.9913	32.3576	39.0031		Ce000094Fg14	pentatricopeptide repeat-containing protein [Carex littledalei]	11.7963	10.1077	9.46558	15.7887	13.9676	25.3648
Ce000042Fg14	hypothetical protein HYC85_007111 [Camellia sinensis]	13.6855	8.8425	9.25386	4.95423	5.64651	4.25202		Ce000069Fg85	calmodulin-like protein [Carex littledalei]	51.6776	156.132	101.677	9.34537	3.45608	1.20966		Ce000169Fg91	hypothetical protein FCM35_KLT14884 [Carex littledalei]	3.03611	1.21271	1.86619	3.61061	6.3442	3.3028		Ce000094Fg42	UDP-galactose transporter 2-like protein [Carex littledalei]	65.0711	40.868	38.4805	109.326	106.182	132.628
Ce000042Fg142	Protein TolB [Carex littledalei]	152.542	26.549	9.49319	4.6244	0.828279	0.890354		Ce000069Fg92	phytochrome B, partial [Eleocharis dulcis]	23.6713	51.9483	50.5308	25.6881	15.3702	19.52		Ce000170Fg36	transcription repressor OFP2-like protein [Carex littledalei]	3.64639	16.8797	30.8267	40.0827	28.4198	7.64778		Ce000094Fg59	RING-type zinc-finger [Carex littledalei]	22.0764	7.75614	6.7094	25.2366	22.192	29.4178
Ce000042Fg145	DCN1-like protein 4 [Carex littledalei]	36.13	28.1014	22.8858	17.021	14.4809	13.4468		Ce000069Fg99	Protein EFR3 [Carex littledalei]	31.8012	43.0333	18.015	20.2387	7.48069	7.39552		Ce000170Fg37	putative serine/threonine-protein kinase WNK5 [Carex littledalei]	5.40853	4.04215	29.3697	72.0523	85.9054	20.1274		Ce000094Fg83	unnamed protein product [Ananas comosus var. bracteatus]	2.1641	2.43519	3.27324	4.10726	8.87738	8.82248
Ce000042Fg154	hypothetical protein FCM35_KLT16445 [Carex littledalei]	28.5452	9.16926	17.6857	3.72856	2.8285	0.802732		Ce000070Fg1	hypothetical protein FCM35_KLT12231 [Carex littledalei]	4.07109	12.7365	7.85744	1.83656	0.430711	0.206729		Ce000170Fg53		15.4879	12.6285	15.8451	18.123	14.9081	7.19698		Ce000094Fg89	glycine-rich RNA-binding protein 3 [Carex littledalei]	19.1817	3.58892	7.20337	34.5754	33.7647	34.7496
Ce000042Fg157	LOW QUALITY PROTEIN: probable isoaspartyl peptidase/L-asparaginase 2 [Phoenix dactylifera]	37.436	12.1032	5.20768	3.56652	15.7184	13.687		Ce000070Fg11	caltractin [Populus trichocarpa]	50.7458	60.0038	51.698	35.6191	35.3101	16.5326		Ce000170Fg66	Elongation factor P [Carex littledalei]	4.91814	10.7795	11.043	12.8328	11.1418	8.06621		Ce000095Fg10	hypothetical protein FCM35_KLT20445 [Carex littledalei]	61.9149	39.6217	49.1184	191.333	148.545	397.922
Ce000042Fg160	glycosyltransferase [Carex littledalei]	63.7661	74.399	38.2519	7.92806	5.84422	0.316268		Ce000070Fg4	putative protein phosphatase 2C 12 [Carex littledalei]	8.16997	17.8695	9.35218	4.09759	3.26125	1.16815		Ce000170Fg67	Protein FATTY ACID EXPORT 3 [Carex littledalei]	53.4109	235.521	280.901	416.023	325.296	80.3079		Ce000095Fg105	plant intracellular Ras-group-related LRR protein 5-like protein [Carex littledalei]	12.3755	9.93615	19.7948	19.4216	26.6873	35.5289
Ce000042Fg41	beta-1,3-galactosyltransferase 11 [Carex littledalei]	14.4582	14.6366	10.9992	7.47572	7.02794	4.12645		Ce000070Fg52	probable nucleoredoxin 1-1 [Elaeis guineensis]	251.715	535.806	522.052	313.631	359.569	104.473		Ce000170Fg8	uncharacterized protein LOC101502256 [Cicer arietinum]	5.95197	5.1066	6.48805	12.8006	12.6312	7.95063		Ce000095Fg129	late embryogenesis abundant protein D-34-like protein [Carex littledalei]	1.17092	0.882382	5.26592	78.2736	225.078	1899.84
Ce000042Fg47	Sulfite exporter TauE/SafE [Carex littledalei]	117.202	105.605	49.803	34.013	33.4486	14.3203		Ce000070Fg6	protein WEAK CHLOROPLAST MOVEMENT UNDER BLUE LIGHT 1-like isoform X2 [Carex littledalei]	33.7229	56.5242	42.2696	24.9276	21.6532	13.0783		Ce000171Fg3	hypothetical protein EZV62_026374 [Acer yangbiense]	17.9387	24.6307	25.0952	41.034	32.3791	15.3238		Ce000095Fg15	hypothetical protein FCM35_KLT20453 [Carex littledalei]	2.25451	1.00328	1.49861	5.77307	5.46589	8.6496
Ce000042Fg55	probable protein arginine N-methyltransferase 1 isoform X1 [Camellia sinensis]	15.7894	8.08135	7.1678	7.31731	6.98927	6.42491		Ce000070Fg60	inter alpha-trypsin inhibitor, heavy chain 4-like protein [Carex littledalei]	69.1125	71.5369	56.1233	9.92551	7.1228	3.69514		Ce000172Fg67	CBL-interacting protein kinase 18-like [Ananas comosus]	9.14216	17.6034	36.3062	60.6557	59.8018	46.9261		Ce000095Fg58	alpha,alpha-trehalose-phosphate synthase [Carex littledalei]	8.43249	13.0739	31.6035	46.0039	51.0052	52.8556
Ce000042Fg61	aminopeptidase M1-B isoform X1 [Carex littledalei]	34.1889	27.6384	21.1911	12.4245	10.8967	13.349		Ce000070Fg64	PREDICTED: rhodanese-like domain-containing protein 19, mitochondrial-like [Cucumis sativus]	3.7443	9.43386	57.0639	27.5636	9.53478	0.106251		Ce000172Fg72	CBL-interacting protein kinase 18-like [Ananas comosus]	15.8056	25.8356	48.5627	77.4135	72.6488	48.3853		Ce000095Fg6	Cyclin-dependent kinase E-1 [Carex littledalei]	30.0892	25.4006	28.5965	48.4221	55.9964	90.2737
Ce000042Fg90	calcium-transporting ATPase 8, plasma membrane-type isoform X1 [Carex littledalei]	27.0337	14.5051	9.01677	7.55378	7.40509	13.5463		Ce000070Fg86	CLIP-associated protein-like protein [Carex littledalei]	22.1978	26.1669	21.4328	9.00505	6.55768	4.39069		Ce000173Fg11	ACT domain-containing protein ACR3 [Carex littledalei]	3.07203	6.82423	41.5418	91.4952	103.321	40.4574		Ce000095Fg75	Endoplasmic reticulum-based factor for assembly of V-ATPase [Carex littledalei]	20.4024	10.2632	7.9724	19.3906	22.3766	22.8885
Ce000042Fg92	glucosidase 2 subunit beta [Carex littledalei]	20.502	14.2776	15.4212	13.7942	9.05384	5.58833		Ce000070Fg88	putative photosystem II protein reaction center W [Carex littledalei]	2.25651	22.1328	18.2183	7.43094	5.9679	0.914529		Ce000174Fg3	hypothetical protein TEA_013005 [Camellia sinensis var. sinensis]	1.28155	2.01371	3.55832	4.69339	5.54132	2.29584		Ce000096Fg10	alanine aminotransferase 2 [Carex littledalei]	0.234455	0.0936157	8.50885	38.3138	123.366	170.368
Ce000043Fg12	NADP-dependent malic enzyme-like protein [Carex littledalei]	180.996	65.764	28.7832	7.34521	5.65065	2.70079		Ce000070Fg9	caltractin [Carex littledalei]	3.90209	37.4753	42.1371	30.9501	20.0204	8.91822		Ce000174Fg7	transmembrane protein [Carex littledalei]	0.0519303	0.337807	1.39196	8.27521	10.8195	0.876095		Ce000096Fg11	phosphoribosylaminoimidazole-succinocarboxamide synthase [Carex littledalei]	13.1161	7.73308	8.45002	31.5419	32.1712	42.8826
Ce000043Fg59	BES1/BZR1 protein 4-like protein [Carex littledalei]	48.555	38.5237	37.5621	14.6085	19.5949	5.06029		Ce000071Fg121	LOW QUALITY PROTEIN: ALG-2 interacting protein X-like [Ananas comosus]	23.5879	23.8774	24.8623	9.60926	9.36843	4.57301		Ce000174Fg73	DEAD-box ATP-dependent RNA helicase 7-like protein [Carex littledalei]	122.845	89.0942	161.116	550.239	395.879	360.563		Ce000096Fg64	protein SGT1 [Carex littledalei]	3.65281	2.95299	8.1567	6.66777	6.64409	12.4007
Ce000043Fg64	hypothetical protein F2Q70_00024514 [Brassica cretica]	13.9942	7.61357	12.8263	9.09768	8.10544	5.3147		Ce000071Fg124	Alpha-galactosidase 1 [Ananas comosus]	33.9914	138.626	71.9595	4.19691	0.83015	0		Ce000175Fg18	polyadenylate-binding protein-interacting protein 8-like protein [Carex littledalei]	28.0882	66.3924	52.706	49.7887	54.6609	54.8591		Ce000097Fg13	polcalcin Syr v 3-like protein [Carex littledalei]	2.58671	2.54388	10.4269	7.57586	6.90938	16.9186
Ce000043Fg76	Enoyl-CoA delta isomerase 3 [Carex littledalei]	13.3752	6.1562	6.49828	8.49817	8.05533	7.00033		Ce000071Fg25	hypothetical protein CEY00_Acc15903 [Actinidia chinensis var. chinensis]	55.7236	73.7461	56.0914	20.3379	20.7076	7.07005		Ce000175Fg74	hypothetical protein FCM35_KLT00963 [Carex littledalei]	4.69509	7.72096	8.61018	32.1438	47.8091	18.3107		Ce000098Fg10	Importin subunit alpha-2 [Vitis vinifera]	165.883	163.305	161.614	278.183	271.975	456.735
Ce000043Fg88	methylenetetrahydrofolate reductase 2-like protein [Carex littledalei]	118.06	103.29	106.623	51.557	42.4826	29.5845		Ce000071Fg28	methionine aminopeptidase 1A isoform X3 [Ananas comosus]	46.6081	44.5541	46.9011	31.4544	24.9544	15.1895		Ce000176Fg12	hypothetical protein C2845_PM06G22750 [Panicum miliaceum]	2.61697	1.6751	1.9356	5.90095	4.87809	2.07135		Ce000098Fg18	shaggy-related protein kinase iota-like isoform X3 [Panicum miliaceum]	3.39541	3.51312	4.03118	5.90331	7.45458	7.85194
Ce000044Fg103	cytochrome c biogenesis protein CCS1 [Carex littledalei]	33.6701	6.84275	3.03471	1.76731	1.18993	0.929368		Ce000071Fg55		4.18579	5.81541	10.1971	1.23398	0.631469	0.046932		Ce000176Fg22	shaggy-related protein kinase, partial [Eleocharis dulcis]	15.9026	15.3261	15.7778	21.9614	14.5967	6.91855		Ce000098Fg46	Protein cereblon [Carex littledalei]	6.48769	6.12334	6.72591	13.7958	12.388	15.067
Ce000044Fg111	proteasome assembly chaperone 2 [Carex littledalei]	36.5516	18.513	15.1892	16.4091	16.0829	17.7895		Ce000071Fg71	Stress responsive A/B Barrel domain-containing protein [Carex littledalei]	54.9416	54.9673	53.0847	35.926	33.0592	19.3181		Ce000177Fg46	6-phosphofructo-2-kinase/fructose-2,6-bisphosphatase isoform X2 [Carex littledalei]	1.16815	2.79338	2.15683	6.33719	2.93007	3.42146		Ce000098Fg47	putative malate dehydrogenase (oxaloacetate-decarboxylating) (NADP(+)) [Lupinus albus]	3.65586	5.90434	10.8594	26.2807	56.3955	128.176
Ce000044Fg122	Molybdenum cofactor sulfurase [Carex littledalei]	28.7995	20.3112	20.587	18.4397	15.5228	10.0437		Ce000071Fg9	PREDICTED: zinc finger CCCH domain-containing protein 19-like, partial [Oryza brachyantha]	31.8838	41.1397	37.5551	10.9266	9.07177	12.0133		Ce000177Fg47	protein FAR1-RELATED SEQUENCE 5 [Sorghum bicolor]	1.57207	2.70415	1.79978	5.86453	3.68169	2.63691		Ce000098Fg6	lysophospholipid acyltransferase LPEAT1 isoform X1 [Carex littledalei]	0.051112	0.0499567	0.14779	2.85472	10.6365	24.1221
Ce000044Fg124	nuclear pore complex protein NUP58 isoform X2 [Ananas comosus]	14.3498	12.1874	14.116	10.3529	7.17972	6.14796		Ce000072Fg22	protein NIM1-INTERACTING 2 [Carex littledalei]	7.71226	20.7069	11.246	0.684517	0.547551	0.290568		Ce000178Fg41	protein YLS9-like protein [Carex littledalei]	32.8937	10.0105	60.6088	86.2886	87.7291	13.9708		Ce000098Fg63	hexokinase-2-like protein [Carex littledalei]	20.6101	17.006	13.444	30.6498	37.3634	44.5951
Ce000044Fg125	thylakoidal processing peptidase 1 [Carex littledalei]	286.612	312.405	178.162	77.5469	71.7693	56.064		Ce000072Fg33	hypothetical protein FH972_013071 [Carpinus fangiana]	73.6377	87.6084	62.5179	28.5731	32.7471	40.3765		Ce000178Fg84	Basic-leucine zipper domain-containing protein [Cynara cardunculus var. scolymus]	4.98684	1.74453	8.9494	23.1166	17.2304	12.4283		Ce000099Fg11	cryptochrome-1-like [Phoenix dactylifera]	9.14391	4.54966	6.49441	15.0439	13.1509	23.5858
Ce000044Fg130	Autophagy-related protein 101 [Carex littledalei]	16.0138	5.21999	10.486	4.02067	6.14461	5.65233		Ce000072Fg71	hypothetical protein C3L33_03595, partial [Rhododendron williamsianum]	137.477	161.075	174.323	66.472	72.6892	33.5544		Ce000178Fg89	Alpha/beta hydrolase family [Carex littledalei]	10.6208	18.084	35.2406	85.275	87.5834	38.3784		Ce000100Fg110	RING-H2 finger protein ATL29-like [Ananas comosus]	0.385801	2.7914	6.05299	39.3435	39.3988	47.4271
Ce000044Fg141	Mitogen-activated protein kinase kinase kinase YODA [Carex littledalei]	58.6215	53.1083	48.4612	31.962	33.6726	22.9272		Ce000072Fg73	ATP-dependent 6-phosphofructokinase 3-like isoform X1 [Carex littledalei]	36.0439	72.0787	65.2583	32.1361	27.0474	14.9344		Ce000178Fg90	Alpha/beta hydrolase family [Carex littledalei]	5.71732	3.01601	5.43922	19.135	26.3327	14.8128		Ce000100Fg14	hypothetical protein FCM35_KLT08220 [Carex littledalei]	64.7042	75.3466	91.1555	210.641	276.34	555.689
Ce000044Fg25	transmembrane protein 115-like protein [Carex littledalei]	105.713	79.0371	70.6897	38.6513	32.1051	35.1073		Ce000072Fg78	Coatomer subunit gamma-2 [Carex littledalei]	85.9989	94.1484	72.0704	33.985	31.1806	20.3661		Ce000179Fg17	protein MITOFERRINLIKE 1 [Carex littledalei]	5.00242	6.11505	6.11071	9.27168	10.1517	9.20558		Ce000100Fg28	--	2.52078	4.7144	4.63698	6.00529	5.79929	7.4725
Ce000044Fg27	hypothetical protein Zm00014a_018312 [Zea mays]	13.16	7.51392	8.51995	9.14788	7.73502	5.82781		Ce000073Fg127	carbamoyl-phosphate synthase large chain [Carex littledalei]	41.014	68.2987	70.9697	29.7045	17.5957	21.6815		Ce000179Fg88	polyol transporter 5-like protein [Carex littledalei]	2.92256	16.7495	19.8684	49.1055	31.4521	20.8262		Ce000100Fg71	late embryogenesis abundant protein D-34-like protein [Carex littledalei]	0.349288	0.402759	3.42664	27.3479	108.285	978.046
Ce000044Fg30	unknown [Zea mays]	33.2055	23.0988	17.0216	8.81226	5.59396	4.20329		Ce000073Fg142	casein kinase I isoform delta-like isoform X1 [Carex littledalei]	130.188	146.432	133.412	60.8378	41.4167	19.7356		Ce000182Fg27	ethylene-responsive transcription factor 1-like [Ananas comosus]	75.2169	56.5523	86.7753	254.579	136.975	67.6728		Ce000100Fg80	hypothetical protein FCM35_KLT20546 [Carex littledalei]	13.6553	16.1941	21.4124	30.1459	27.9704	32.8733
Ce000044Fg35	vacuolar protein sorting-associated protein 53 A [Carex littledalei]	15.5012	14.2937	10.7191	7.7752	7.55437	6.08421		Ce000073Fg35	3-oxoacyl-[acyl-carrier-protein] synthase III [Carex littledalei]	60.3052	223.854	344.002	149.582	138.676	106.346		Ce000182Fg36	phytoene dehydrogenase [Carex littledalei]	10.1655	33.8945	38.5858	52.2438	39.9945	24.6966		Ce000100Fg93	plant intracellular Ras-group-related LRR protein 5-like protein [Carex littledalei]	12.8326	16.1841	34.3308	21.5986	24.6346	39.0534
Ce000044Fg38	putative methyltransferase PMT28 isoform X1 [Carex littledalei]	17.7898	12.5956	11.9213	8.83767	6.00282	2.00205		Ce000073Fg48	phospholipase D zeta 1-like [Nymphaea colorata]	26.3713	35.302	34.3856	9.34853	4.0792	2.47038		Ce000182Fg43	putative calcium-binding protein CML8 [Carex littledalei]	30.368	58.7846	210.561	313.887	314.297	288.348		Ce000101Fg118	hypothetical protein GW17_00001306 [Ensete ventricosum]	2.84187	4.00802	5.74533	3.24004	4.25648	10.2121
Ce000044Fg56	tubulin alpha-1 chain-like [Juglans regia]	285.812	251.166	205.207	71.5788	18.2282	2.86706		Ce000073Fg58	myosin-17-like [Gossypium australe]	30.6706	35.6516	32.5974	14.3224	10.424	9.39466		Ce000182Fg62	uroporphyrinogen-III synthase [Carex littledalei]	2.99107	7.1871	12.6495	11.1923	8.9732	7.15941		Ce000101Fg121	PREDICTED: SNF1-related protein kinase regulatory subunit gamma-like PV42a [Musa acuminata subsp. malaccensis]	7.98974	11.345	17.449	22.1538	19.9632	27.3343
Ce000044Fg57	amino acid permease 6 [Carex littledalei]	45.4584	16.3291	8.52516	27.8784	22.4506	15.8957		Ce000073Fg68	histone deacetylase 19-like protein [Carex littledalei]	94.3818	490.054	598.445	95.1813	45.138	10.0517		Ce000182Fg69	protein DCL [Carex littledalei]	10.3428	12.0655	17.0921	21.6712	16.3628	10.8388		Ce000101Fg49	hypothetical protein FCM35_KLT10801 [Carex littledalei]	148.841	64.7815	82.9534	103.058	125.438	133.253
Ce000044Fg58	40S ribosomal protein S29-like isoform X1 [Populus alba]	21.6447	10.1747	10.2982	18.4091	15.4129	11.409		Ce000073Fg87	Cotton fiber expressed protein [Carex littledalei]	20.1924	91.0497	70.3429	3.91719	1.49957	1.62341		Ce000182Fg76	transport inhibitor response 1-like protein [Carex littledalei]	11.0439	8.39054	11.4027	34.2484	44.2537	19.522		Ce000103Fg2	Matrixin family protein [Carex littledalei]	1.61901	0.429959	1.90142	2.65718	2.87266	6.88077
Ce000044Fg61	hypothetical protein FCM35_KLT19822 [Carex littledalei]	66.0901	21.2241	22.3222	29.1935	13.3091	28.0772		Ce000073Fg91	nuclease HARBI1 [Carex littledalei]	107.544	271.453	171.138	27.9168	12.0863	4.07421		Ce000182Fg77	transport inhibitor response 1-like protein [Carex littledalei]	11.3791	9.51121	12.5383	30.6642	34.5289	15.5083		Ce000103Fg7	Holliday junction resolvase [Carex littledalei]	11.4944	12.8826	13.9988	17.6729	14.023	22.9324
Ce000044Fg63	hypothetical protein B296_00022263 [Ensete ventricosum]	138.554	112.586	93.5904	59.6717	56.6271	26.2312		Ce000073Fg95	protein CHUP1 [Carex littledalei]	49.5028	59.0264	53.3373	17.092	16.2128	23.0183		Ce000183Fg56	RPM1-interacting protein 4 [Carex littledalei]	0	0.968149	1.56087	8.42665	64.808	25.1866		Ce000104Fg11	Nephrocystin-3 [Carex littledalei]	1.79945	1.44426	2.17632	4.87547	4.0616	5.66904
Ce000044Fg71	heterogeneous nuclear ribonucleoprotein 1-like protein [Carex littledalei]	15.7009	6.48718	5.5104	6.66134	5.44506	6.73403		Ce000074Fg13	hypothetical protein FCM35_KLT11541 [Carex littledalei]	16.1286	38.3749	41.3339	30.7215	24.3423	6.59535		Ce000183Fg67	inter alpha-trypsin inhibitor, heavy chain 4-like protein [Carex littledalei]	27.0514	30.4343	60.0268	113.831	71.1326	72.0531		Ce000104Fg110	dynein light chain LC6, flagellar outer arm-like protein [Carex littledalei]	4.85633	1.2989	0.987421	3.09979	6.68497	51.0486
Ce000044Fg85	exocyst complex component SEC3A-like isoform X2 [Carex littledalei]	41.063	32.5258	24.8661	17.8529	19.0735	25.3047		Ce000074Fg15	formin-A-like protein [Carex littledalei]	34.486	131.315	221.581	128.128	102.029	33.5337		Ce000183Fg77	2-isopropylmalate synthase A-like protein [Carex littledalei]	66.9271	92.123	105.342	153.912	152.734	134.059		Ce000104Fg32	dnaJ subfamily B member 13-like protein [Carex littledalei]	27.7089	21.2341	25.1346	37.7685	42.93	80.0204
Ce000044Fg86	hypothetical protein FCM35_KLT11412 [Carex littledalei]	45.8413	16.4017	7.8072	3.68977	3.79318	0.727552		Ce000074Fg43	CHCH domain-containing protein [Carex littledalei]	15.3116	22.6996	44.9123	8.05646	5.56761	1.95362		Ce000184Fg12	magnesium-chelatase subunit ChlI [Carex littledalei]	5.85017	10.8775	8.71569	16.075	11.985	11.3816		Ce000104Fg41	guanylate-binding protein 4-like protein [Carex littledalei]	33.7783	31.1989	28.7349	32.9254	38.2913	88.5457
Ce000044Fg99	BTB/POZ domain-containing protein [Carex littledalei]	18.9355	11.3301	18.5253	7.727	3.18635	0.212616		Ce000076Fg104	cell division control protein2-like protein [Zea mays]	55.8626	102.832	54.2954	41.138	29.0447	14.3177		Ce000184Fg23	serpin-ZXA-like protein [Carex littledalei]	6.73201	5.81284	9.39818	15.119	16.9304	7.03752		Ce000104Fg73	hypothetical protein FCM35_KLT00844 [Carex littledalei]	10.4347	2.11165	2.92434	12.4882	19.0126	71.866
Ce000045Fg113	nucleotide pyrophosphatase/phosphodiesterase isoform X1 [Carex littledalei]	22.1506	11.5877	3.40848	7.09408	10.697	5.81139		Ce000076Fg2	methionine aminopeptidase 1A isoform X3 [Ananas comosus]	41.0808	39.4538	37.272	24.549	18.2928	9.69934		Ce000184Fg41	protein NRT1/ PTR FAMILY 8.3-like protein [Carex littledalei]	3.99229	3.56903	7.35327	10.8477	6.86565	0.124232		Ce000104Fg79	putative aquaporin TIP2-2 [Carex littledalei]	36.3859	9.42543	9.85021	25.6055	25.4247	46.1629
Ce000045Fg114	nucleotide pyrophosphatase/phosphodiesterase isoform X1 [Carex littledalei]	25.8764	14.6404	4.69881	8.18275	9.69645	4.71523		Ce000076Fg21	PREDICTED: zinc finger CCCH domain-containing protein 19-like, partial [Oryza brachyantha]	33.1348	42.6195	41.1409	10.6351	9.34895	11.2546		Ce000184Fg46	metal tolerance protein 4-like protein [Carex littledalei]	11.0624	22.2664	31.7461	74.7767	86.2228	63.8946		Ce000104Fg80	putative aquaporin TIP2-2 [Carex littledalei]	674.636	64.1444	167.304	616.682	640.894	905.906
Ce000045Fg125	zinc finger matrin-type protein 1-like isoform X1 [Carex littledalei]	34.9444	35.1603	28.9498	25.4328	24.2392	15.4741		Ce000076Fg35	Beta-1,3-glucosyltransferase [Carex littledalei]	7.98568	22.8574	31.549	12.8894	17.0288	2.82063		Ce000184Fg64		2.55875	2.54047	2.26745	5.89779	5.21721	5.07051		Ce000104Fg91	cyclin-dependent kinase F-1-like protein [Carex littledalei]	9.87124	5.34507	5.72508	13.1034	11.4434	24.932
Ce000045Fg130	importin subunit beta-1-like protein [Carex littledalei]	60.5302	51.6362	43.3142	25.002	20.4807	20.8599		Ce000076Fg4	hypothetical protein CEY00_Acc15903 [Actinidia chinensis var. chinensis]	54.5281	67.736	49.8544	20.1749	24.0561	6.68951		Ce000185Fg90	unnamed protein product [Ananas comosus var. bracteatus]	9.91024	13.176	15.7562	22.8418	21.968	11.5529		Ce000104Fg98	Alpha-galactosidase mel1 [Carex littledalei]	15.4195	23.11	18.5448	44.9868	53.241	144.528
Ce000045Fg132	putative galacturonosyltransferase 13 [Carex littledalei]	31.4511	21.5719	11.6636	5.66398	4.66416	2.29674		Ce000076Fg54	Mitochondrial import inner membrane translocase subunit TIM23-2 [Carex littledalei]	28.1914	39.0705	22.4308	7.51949	8.98836	8.07144		Ce000186Fg42	Na+/H+ antiporter [Carex littledalei]	30.387	19.4044	11.2122	26.4243	28.0715	19.7681		Ce000105Fg65		19.2608	13.9229	6.61668	12.1555	10.8005	46.3288
Ce000045Fg137	chorismate mutase 3 [Carex littledalei]	60.2299	73.7778	30.6518	13.0372	11.5255	5.82255		Ce000076Fg84	inactive rhomboid protein 1-like protein [Carex littledalei]	43.2538	81.8108	43.1028	12.7669	7.07404	2.23264		Ce000186Fg67	hypothetical protein FCM35_KLT15229 [Carex littledalei]	3.09378	3.96101	2.85889	8.32348	6.2322	3.63558		Ce000106Fg68	zinc finger protein [Carex littledalei]	13.1703	14.7171	19.3072	25.4383	29.3441	32.8889
Ce000045Fg140	Protein ENHANCED DISEASE RESISTANCE 2 [Carex littledalei]	42.7255	20.0367	15.7803	4.64492	3.9757	2.42073		Ce000076Fg85	protein IQ-DOMAIN 1-like protein [Carex littledalei]	38.5495	71.478	65.609	47.2277	38.9309	10.1438		Ce000188Fg31	putative aldo-keto reductase 1 [Carex littledalei]	9.98988	39.4754	44.4732	37.9959	31.9154	28.8296		Ce000107Fg41	G-box-binding factor 4-like protein [Carex littledalei]	22.3445	21.6527	25.8149	37.7119	49.1912	64.4526
Ce000045Fg146	CSC1-like protein HYP1 [Carex littledalei]	24.3407	12.0319	15.0514	11.2645	12.8024	16.6969		Ce000077Fg116	E3 ubiquitin-protein ligase [Carex littledalei]	29.7325	32.7301	31.5681	16.1033	14.5745	5.08109		Ce000188Fg34		0.987	2.18817	14.1773	66.8945	81.3218	72.7294		Ce000107Fg61	uncharacterized protein LOC8077159 [Sorghum bicolor]	2.93244	6.08981	10.5592	3.57562	7.93152	9.89082
Ce000045Fg162	Transcription factor PCL1 [Carex littledalei]	20.8865	4.73477	8.14583	2.59722	1.60157	0.84759		Ce000077Fg119	hypothetical protein F8388_019766 [Cannabis sativa]	98.4036	107.297	118.211	96.1436	86.774	46.7329		Ce000188Fg39	pyruvate kinase isozyme A [Carex littledalei]	43.4508	76.3789	78.5243	89.4394	84.2895	40.7976		Ce000107Fg88	hypothetical protein SEVIR_9G484000v2 [Setaria viridis]	18.5755	16.9065	16.4253	22.5535	23.8774	38.9969
Ce000045Fg170	calcium-transporting ATPase 1, plasma membrane-type-like protein [Carex littledalei]	45.2171	51.1701	16.6107	9.21821	7.08289	2.97678		Ce000077Fg120	switch-associated protein 70-like protein [Carex littledalei]	38.5081	60.5277	51.4685	24.6762	22.6597	16.0689		Ce000188Fg41	hypothetical protein FCM35_KLT11851 [Carex littledalei]	9.75724	17.8886	25.827	105.102	119.872	48.3741		Ce000107Fg95	Zinc finger MYND domain-containing protein 15 [Carex littledalei]	2.69641	0.770808	1.182	4.02039	2.936	5.69123
Ce000045Fg21	soluble inorganic pyrophosphatase-like protein [Carex littledalei]	24.2489	10.5153	11.7409	6.1653	5.16946	3.92296		Ce000077Fg22	extra-large guanine nucleotide-binding protein 1-like isoform X1 [Phoenix dactylifera]	29.98	35.6317	32.3297	13.5947	12.4619	10.8201		Ce000190Fg27	cytochrome c-type biogenesis ccda-like chloroplastic protein 2 isoform X1 [Carex littledalei]	8.5694	14.5814	11.9882	17.1592	17.1751	10.5741		Ce000107Fg97	carboxymethylenebutenolidase [Carex littledalei]	1.19789	0.986712	1.8244	7.47997	5.87082	11.5374
Ce000045Fg32	putative DNA-binding protein ESCAROLA [Carex littledalei]	47.6568	48.434	25.9837	16.5724	11.2776	4.97772		Ce000077Fg23	hypothetical protein FCM35_KLT01500 [Carex littledalei]	74.418	176.498	226.787	55.9737	49.7227	7.50524		Ce000190Fg59	hypothetical protein FCM35_KLT07265 [Carex littledalei]	11.5584	19.2872	11.8728	26.758	34.4249	8.30045		Ce000108Fg103	eukaryotic peptide chain release factor GTP-binding subunit ERF3A-like protein [Carex littledalei]	52.2175	49.3286	66.6184	81.0087	68.5034	138.661
Ce000045Fg38	uracil phosphoribosyltransferase-like isoform X2 [Carex littledalei]	23.7367	18.0947	10.3378	30.5495	12.2917	7.93503		Ce000077Fg43	protein DA1-related 1-like isoform X3 [Carex littledalei]	51.4617	47.3234	55.1938	42.6849	28.7227	14.8887		Ce000190Fg71	protein TIC 20-I [Carex littledalei]	7.50486	8.34571	10.0719	17.8999	16.5999	12.9597		Ce000108Fg23	hypothetical protein FCM35_KLT13256 [Carex littledalei]	9.98259	6.29179	5.87446	9.58267	11.7178	20.0567
Ce000045Fg48	phosphatidylinositol:ceramide inositolphosphotransferase-like isoform X1 [Carex littledalei]	85.6025	76.134	71.7939	15.7735	15.1328	9.31535		Ce000077Fg45	E3 ubiquitin-protein ligase RNF5-like protein [Carex littledalei]	29.4593	27.4548	30.8822	11.8872	13.479	8.98327		Ce000190Fg88	phosphomethylpyrimidine synthase [Carex littledalei]	16.3556	6.40397	8.40891	100.368	54.0664	31.3165		Ce000108Fg25	Lactoylglutathione lyase [Triticum urartu]	24.9882	33.5934	41.7242	63.6069	65.4683	118.073
Ce000045Fg50	uncharacterized protein LOC109850943 [Asparagus officinalis]	142.778	36.7891	28.6221	6.04046	6.0581	1.19273		Ce000077Fg54	hypothetical protein FCM35_KLT22423 [Carex littledalei]	41.1134	117.296	158.233	107.122	54.6842	62.1373		Ce000190Fg92	Cationic peroxidase SPC4 [Ananas comosus]	1.94163	4.15752	4.04323	10.004	8.20653	4.54883		Ce000108Fg30	Thylakoid lumenal protein 2 [Carex littledalei]	0.515413	0.251391	0.0617103	1.16192	1.97471	14.7623
Ce000045Fg52	L-type lectin-domain containing receptor kinase VIII.1-like [Ananas comosus]	17.8095	16.5048	13.6273	7.13234	8.67872	4.5863		Ce000077Fg55	protein PHLOEM PROTEIN 2-LIKE A10-like protein [Carex littledalei]	25.5887	39.8546	40.1865	19.41	17.4075	12.125		Ce000192Fg35	enhancer of rudimentary isoform X1 [Carex littledalei]	6.04076	5.21724	7.97222	17.0446	16.0072	8.62763		Ce000108Fg40	SNF1-related protein kinase regulatory subunit beta-3-like protein [Carex littledalei]	12.9629	13.288	15.4764	34.6874	38.7224	53.3806
Ce000045Fg53	hypothetical protein CUMW_032880 [Citrus unshiu]	125.124	60.2861	39.2452	22.4882	7.53796	7.91917		Ce000077Fg6	hypothetical protein FCM35_KLT01550 [Carex littledalei]	21.1181	59.905	63.8512	32.0307	50.3161	32.7795		Ce000193Fg30	putative zinc transporter [Carex littledalei]	9.49289	24.9765	24.8084	36.9468	46.5219	9.09125		Ce000108Fg62	probable 4-hydroxy-tetrahydrodipicolinate reductase 1, chloroplastic [Phoenix dactylifera]	9.7024	6.82575	7.91605	33.5787	33.4003	92.1019
Ce000045Fg55	protein SSUH2 homolog isoform X2 [Brachypodium distachyon]	217.868	242.18	156.018	56.3982	47.0831	52.6727		Ce000077Fg70	putative xyloglucan glycosyltransferase 9 [Carex littledalei]	31.1104	74.1794	56.6749	9.7257	4.32432	0.0691767		Ce000193Fg41	ribulose-1,5 bisphosphate carboxylase/oxygenase large subunit N-methyltransferase [Carex littledalei]	4.06987	5.72652	6.41549	8.897	6.64971	6.63069		Ce000108Fg67	unnamed protein product [Ananas comosus var. bracteatus]	12.2579	15.4706	16.9623	26.1587	36.7762	56.9783
Ce000045Fg56	mitochondrial uncoupling protein 1 [Carex littledalei]	22.1203	20.1416	14.2256	6.85629	4.94532	2.89862		Ce000077Fg91	hypothetical protein C4D60_Mb02t14090 [Musa balbisiana]	123.972	118.941	112.756	68.7812	61.098	45.7733		Ce000194Fg15	10-deacetylbaccatin III 10-O-acetyltransferase [Carex littledalei]	3.21595	15.4319	59.1088	357.412	129.881	119.442		Ce000108Fg7	Glycerate dehydrogenase HPR, peroxisomal [Dichanthelium oligosanthes]	0.761533	0.144642	0.275659	2.36036	20.5473	95.5259
Ce000045Fg58	glycosyltransferase family 64 protein C4 isoform X2 [Carex littledalei]	46.5401	27.4857	20.1752	15.1083	11.4011	11.3384		Ce000078Fg12	leucine-rich repeat receptor-like tyrosine-protein kinase PXC3 [Carex littledalei]	8.98671	23.2625	7.83143	3.45353	3.39006	2.29206		Ce000194Fg8	shaggy-related protein kinase iota-like isoform X3 [Panicum miliaceum]	2.82792	2.74996	3.43456	4.48088	5.87381	3.97865		Ce000108Fg94	hypothetical protein FCM35_KLT11299 [Carex littledalei]	3.72818	1.5324	0.92117	3.26125	8.67373	11.0204
Ce000045Fg59	inositol monophosphatase 3 isoform X4 [Carex littledalei]	41.9472	29.3594	27.9285	20.9856	18.5763	11.4273		Ce000078Fg6	lipase-like PAD4 [Carex littledalei]	28.4053	76.1073	62.7705	15.9139	10.3963	11.224		Ce000195Fg21	Phosphoglucan phosphatase DSP4, amyloplastic [Vitis vinifera]	26.0278	50.0171	50.03	93.2387	88.7539	56.4956		Ce000109Fg11	class I heat shock protein 1-like protein [Carex littledalei]	0.758936	0.950524	1.46335	7.06713	13.8826	278.17
Ce000045Fg71	protein transport protein Sec61 subunit alpha-like protein [Carex littledalei]	270.831	197.624	154.117	146.421	121.487	142.824		Ce000078Fg76	putative phytol kinase 1 [Carex littledalei]	1.36242	11.0623	11.0163	2.81051	1.73725	1.02319		Ce000195Fg30	hypothetical protein ARALYDRAFT_329352 [Arabidopsis lyrata subsp. lyrata]	24.9079	41.5229	51.405	68.339	31.7692	7.75993		Ce000109Fg19	hypothetical protein FCM35_KLT06312 [Carex littledalei]	3.41508	1.95559	3.73452	5.59708	7.30161	7.65815
Ce000045Fg82	E3 ubiquitin-protein ligase [Carex littledalei]	25.2053	15.7732	22.4882	18.7747	14.8667	7.21773		Ce000078Fg8	amino acid permease 3-like protein [Carex littledalei]	27.6775	44.7406	14.0494	7.38893	5.86824	5.4179		Ce000195Fg40	Protein CHAPERONE-LIKE PROTEIN OF POR1 [Carex littledalei]	2.33401	3.31811	2.99811	6.13212	5.03633	3.62927		Ce000109Fg21	5-oxoprolinase [Carex littledalei]	6.50541	7.33824	4.91022	6.357	5.99063	19.4915
Ce000045Fg84	RCC1 and BTB domain-containing protein 1-like protein [Carex littledalei]	15.914	11.6959	7.92702	3.20784	3.54902	5.77051		Ce000078Fg88	ubiquinol oxidase 4 [Carex littledalei]	23.8579	40.1212	66.2803	27.0869	26.2452	12.7537		Ce000195Fg44	NEP1-interacting protein 2-like protein [Carex littledalei]	51.6155	99.4815	131.732	166.895	70.3399	21.073		Ce000109Fg28	pentatricopeptide repeat-containing protein [Carex littledalei]	3.57725	3.67711	3.11882	8.19381	10.3163	9.7787
Ce000045Fg99	transcription initiation factor TFIID subunit 8 [Carex littledalei]	16.5053	9.04588	6.9448	5.79877	6.73232	5.02032		Ce000078Fg89	zinc finger CCCH domain-containing protein 66-like isoform X1 [Carex littledalei]	70.9071	72.5184	69.7669	33.1622	19.3948	4.79678		Ce000195Fg62	24-methylenesterol C-methyltransferase 2 [Carex littledalei]	44.3242	61.3022	37.8725	88.7049	77.6029	54.8598		Ce000109Fg42	zinc-finger of the FCS-type, C2-C2 [Carex littledalei]	35.4549	105.847	162.736	453.087	559.468	608.809
Ce000046Fg26	hypothetical protein BHM03_00045888 [Ensete ventricosum]	44.7842	28.3464	16.6882	12.6993	11.4245	4.83512		Ce000079Fg121	glucan endo-1,3-beta-glucosidase [Carex littledalei]	69.1127	117.261	56.5376	12.4596	10.7022	7.43654		Ce000195Fg64		1.91457	1.62321	2.84167	6.26948	6.65517	2.06473		Ce000110Fg15	Phospholipase A(1) LCAT3 [Carex littledalei]	7.51688	13.7416	6.7253	6.06664	6.28763	27.4385
Ce000046Fg38	Auxin response factor 4 [Carex littledalei]	81.0929	65.0705	67.0686	64.017	47.5235	28.8439		Ce000079Fg21	carboxylesterase 17 [Carex littledalei]	20.6758	57.4596	37.3892	10.8869	18.6715	38.431		Ce000195Fg88	thiol-disulfide oxidoreductase LTO1 [Carex littledalei]	6.20466	10.0122	11.0701	13.9132	10.704	6.33626		Ce000110Fg51	exocyst complex component EXO70A1-like [Ananas comosus]	67.0308	72.852	84.2732	122.157	149.734	347.694
Ce000046Fg6	Protein DEK [Carex littledalei]	45.926	27.4663	23.105	20.0682	17.4614	17.0345		Ce000079Fg30	Embryogenesis-associated protein EMB8 [Carex littledalei]	3.15757	22.7084	16.4198	7.10699	7.14156	3.10229		Ce000196Fg11	hypothetical protein FCM35_KLT06312 [Carex littledalei]	6.84502	7.02698	7.17185	12.0592	13.6714	11.4391		Ce000110Fg92	BTB/POZ domain-containing protein [Carex littledalei]	16.4071	18.5576	17.2974	19.7315	22.9955	42.1864
Ce000046Fg62	hypothetical protein FCM35_KLT17702 [Carex littledalei]	112.173	81.554	73.5842	43.322	55.3377	34.4318		Ce000079Fg39	putative pyruvate, phosphate dikinase regulatory protein [Carex littledalei]	24.3992	88.3427	109.508	25.9353	13.3358	5.83045		Ce000196Fg36	zinc-finger of the FCS-type, C2-C2 [Carex littledalei]	56.9415	187.441	281.802	937.351	1223.16	1033.46		Ce000111Fg21	mitochondrial substrate carrier family protein C-like protein [Carex littledalei]	8.49305	9.46838	8.28044	9.28856	9.69998	35.8488
Ce000046Fg65	E3 ubiquitin-protein ligase [Carex littledalei]	13.7275	10.158	12.7049	12.5097	10.7616	6.8129		Ce000079Fg56	ethanolamine-phosphate cytidylyltransferase-like protein [Carex littledalei]	32.6201	31.8927	31.1122	33.3216	25.2248	10.0696		Ce000196Fg67	hypothetical protein FCM35_KLT06349 [Carex littledalei]	3.02157	3.08772	4.00689	12.7057	9.34193	1.48432		Ce000111Fg55	mRNA turnover protein 4 [Carex littledalei]	20.1305	13.4285	16.3486	36.7556	27.8785	51.6107
Ce000046Fg88	hypothetical protein FCM35_KLT00928 [Carex littledalei]	12.955	9.02053	9.00584	8.01967	9.97129	6.35451		Ce000079Fg75	Late embryogenesis abundant protein [Carex littledalei]	30.2898	50.3962	44.8582	27.2755	17.3167	7.58599		Ce000197Fg54	F-box/LRR-repeat protein 14-like protein [Carex littledalei]	11.7634	17.7031	24.9017	34.9066	24.3611	15.3551		Ce000111Fg68	cytochrome P450 714C2-like isoform X1 [Carex littledalei]	4.50274	3.69882	5.57312	18.6131	21.7579	34.6202
Ce000046Fg98	abscisic acid receptor PYL8-like isoform X1 [Carex littledalei]	19.6807	9.40633	8.11423	6.7948	5.23061	6.59789		Ce000079Fg79	putative LRR receptor-like serine/threonine-protein kinase [Carex littledalei]	13.0075	34.8716	14.864	7.18929	5.25339	3.86902		Ce000197Fg63	hypothetical protein TEA_025566 [Camellia sinensis var. sinensis]	15.9695	13.9711	19.2747	42.895	24.5898	23.0777		Ce000112Fg42	caleosin [Carex littledalei]	0.351329	0.179839	0.490475	2.99421	14.9971	34.5945
Ce000047Fg52	delta(7)-sterol-C5(6)-desaturase-like protein [Carex littledalei]	34.9315	32.9494	24.7609	14.8753	9.53101	1.29531		Ce000079Fg80	hypothetical protein FCM35_KLT05374 [Carex littledalei]	42.8552	91.2643	73.6154	41.7139	25.3347	18.1572		Ce000198Fg12	protein sym-1-like protein [Carex littledalei]	10.5514	7.49528	12.2694	41.4573	36.708	38.7359		Ce000112Fg50	TPR repeat [Carex littledalei]	9.23653	8.16381	10.3627	20.4393	25.2562	40.2563
Ce000047Fg72	PB1 domain-containing protein [Carex littledalei]	95.399	57.9584	50.1518	39.0066	28.8997	26.2796		Ce000080Fg1	Vesicle-associated protein 2-2 [Carex littledalei]	10.2006	14.1921	29.8179	21.6696	11.5609	8.23083		Ce000198Fg25	AP2/EREBP transcriptional factor WRI1 [Cyperus esculentus var. sativus]	0.67417	0.795682	3.59289	39.0542	45.8158	12.1097		Ce000112Fg56	Beta-amylase 1 [Carex littledalei]	66.217	84.1776	62.773	107.637	285.216	549.371
Ce000048Fg53	CCR4-NOT transcription complex subunit 4 [Carex littledalei]	15.9208	14.2689	13.6922	8.65827	7.72771	7.38281		Ce000080Fg37	protein BONZAI 3-like isoform X1 [Carex littledalei]	20.4553	27.1685	19.3255	9.36691	8.03824	5.76703		Ce000198Fg63	ethylene response factor [Carex littledalei]	0.21559	0.482013	3.55366	27.8215	38.4737	15.9938		Ce000112Fg64	AWPM-19-like family [Carex littledalei]	0.946424	1.67318	14.4703	5.53448	6.89548	14.6941
Ce000048Fg85	phosphoinositide phospholipase C 4-like isoform X2 [Carex littledalei]	14.5856	7.18105	3.47291	1.55505	1.60276	0.606461		Ce000080Fg38	hypothetical protein FCM35_KLT09752 [Carex littledalei]	5.357	12.9322	15.0378	11.5276	7.69177	9.9566		Ce000199Fg43	D-amino-acid transaminase, chloroplastic-like [Ananas comosus]	13.1281	12.7268	14.7791	40.1969	36.3266	10.7851		Ce000112Fg84	sterol 3-beta-glucosyltransferase UGT80A2 isoform X2 [Carex littledalei]	0.48798	0.15328	0.294205	1.1813	2.06764	6.13911
Ce000048Fg87	Clathrin heavy chain 2 [Carex littledalei]	84.4841	78.0278	49.6805	32.6728	19.2684	30.7118		Ce000080Fg48	glycyl-tRNA synthetase-like protein [Carex littledalei]	38.9785	46.759	44.701	29.5868	21.4152	8.45601		Ce000199Fg51	hypothetical protein LSAT_1X120800 [Lactuca sativa]	5.9706	5.74793	6.74843	15.8381	15.0247	5.73264		Ce000113Fg1	Suppressor of mec-8 and unc-52 protein [Carex littledalei]	19.7205	15.1974	17.281	35.0287	43.3747	78.862
Ce000049Fg4	lipase-like isoform X1 [Carex littledalei]	29.0236	18.4665	19.8369	19.2472	15.1937	11.4076		Ce000080Fg50	putative beta-1,4-xylosyltransferase IRX10L [Carex littledalei]	30.0053	75.0571	60.5716	11.901	10.0815	4.56181		Ce000200Fg13	hypothetical protein C4D60_Mb11t05090 [Musa balbisiana]	20.1049	16.9219	22.0313	40.8439	35.4464	27.9592		Ce000114Fg16	INO80 complex subunit D-like isoform X2 [Carex littledalei]	9.22592	5.51543	9.79952	14.8843	23.0813	57.273
Ce000050Fg131	cell number regulator 2-like [Panicum hallii]	32.5371	28.6024	9.25375	5.32397	3.55781	2.29939		Ce000080Fg84	acetate--CoA ligase ACS [Carex littledalei]	197.09	223.035	288.237	87.6533	58.6604	48.8243		Ce000200Fg49	cleavage and polyadenylation specificity factor subunit 3-II [Carex littledalei]	6.57657	4.34324	5.47369	13.9301	12.9868	13.047		Ce000114Fg17	Gem-associated protein 2 [Carex littledalei]	5.12077	4.59524	6.65651	19.042	30.4033	77.146
Ce000050Fg16	hypothetical protein BHM03_00007358 [Ensete ventricosum]	488.413	281.087	281.434	169.062	152.779	80.6145		Ce000080Fg90	A20 and AN1 domain-containing stress-associated protein [Carex littledalei]	121.858	115.671	140.463	60.7201	54.5769	34.6103		Ce000201Fg1	uncharacterized protein LOC109704196 isoform X1 [Ananas comosus]	0.79668	1.29949	7.78049	6.20348	3.14844	1.80019		Ce000114Fg8	PREDICTED: thioredoxin-like protein 4B [Fragaria vesca subsp. vesca]	3.69895	1.65293	1.88901	8.01571	10.8576	21.1776
Ce000050Fg27	WRKY transcription factor 19 [Carex littledalei]	155.762	115.071	111.054	82.6466	70.0256	26.3513		Ce000080Fg91	PHD finger protein ING2 [Carex littledalei]	20.8731	45.5993	105.682	21.2358	25.5395	11.5227		Ce000201Fg25	pollen-specific leucine-rich repeat extensin-like protein 2 [Carex littledalei]	29.4016	15.2587	29.5851	77.8645	64.8551	12.7251		Ce000115Fg22	60S ribosomal protein L13a-4 [Morus notabilis]	210.399	115.695	118.119	268.656	217.787	426.22
Ce000050Fg4	IST1-like protein isoform X1 [Carex littledalei]	151.41	117.776	101.667	38.784	34.1734	14.8793		Ce000081Fg33	30S ribosomal protein S5 [Morus notabilis]	17.567	39.0744	43.0558	39.0883	25.0485	25.9141		Ce000202Fg1	E3 ubiquitin ligase SUD1 [Carex littledalei]	9.9433	8.20256	12.5757	26.4958	22.1085	9.91915		Ce000115Fg25	cysteine protease inhibitor [Carex littledalei]	24.5444	9.30524	12.8209	23.3638	30.9685	46.8984
Ce000050Fg45	ABC transporter B family member 19 [Carex littledalei]	44.2943	19.5365	6.77542	10.9462	4.54295	0.259262		Ce000081Fg49	phospholipase A I isoform X2 [Carex littledalei]	0.711553	7.15111	5.8168	7.99236	1.25504	4.1022		Ce000202Fg42	hypothetical protein GQ55_5G050600 [Panicum hallii var. hallii]	708.842	1881.51	2698.66	4080.19	3245.31	1536.26		Ce000115Fg91	hypothetical protein Saspl_002843 [Salvia splendens]	6.75113	5.43672	5.33411	9.32455	10.6074	14.7977
Ce000050Fg47	F-box/kelch-repeat protein SKIP11-like protein [Carex littledalei]	20.1106	16.5803	12.4642	11.8993	6.7187	3.67325		Ce000082Fg20	--	2.34798	8.44846	5.60669	2.75805	2.617	3.32618		Ce000202Fg44	hypothetical protein FCM35_KLT04806 [Carex littledalei]	2.71281	4.02508	7.77386	11.6132	8.02427	1.49244		Ce000116Fg103	ankyrin-1 isoform X1 [Carex littledalei]	18.2314	14.6068	13.2663	24.9253	28.4184	40.8676
Ce000050Fg74	putative methyltransferase PMT2 [Carex littledalei]	23.6588	18.0476	18.4348	18.0347	16.6233	9.96206		Ce000082Fg48	E3 ubiquitin-protein ligase [Carex littledalei]	37.0311	38.3333	39.4932	29.7498	28.2382	17.4661		Ce000203Fg28	bifunctional nuclease 2-like isoform X1 [Carex littledalei]	39.6188	57.0315	115.648	121.704	82.2826	93.0807		Ce000116Fg118	uncharacterized protein LOC110022639 [Phalaenopsis equestris]	10.1409	9.08542	10.3841	30.641	30.385	36.2564
Ce000050Fg8	hypothetical protein EJB05_09437, partial [Eragrostis curvula]	94.1561	67.1724	36.7931	27.2732	21.0379	14.7066		Ce000083Fg104	nucleolar protein 58-like protein [Carex littledalei]	230.082	421.961	498.314	528.145	339.901	103.158		Ce000203Fg34	Phosphoenolpyruvate/phosphate translocator 2 [Carex littledalei]	71.6084	97.0799	108.772	192.651	156.931	66.3744		Ce000116Fg122	rRNA methyltransferase YlbH [Carex littledalei]	10.2348	8.81108	10.5953	21.4913	22.2435	36.5077
Ce000050Fg83	hypothetical protein FCM35_KLT11710 [Carex littledalei]	20.4445	5.47864	11.3854	11.6689	10.1786	4.4285		Ce000083Fg13	OTU domain-containing protein 5-like isoform X2 [Carex littledalei]	43.3728	43.7755	37.005	5.99673	6.28708	6.26248		Ce000203Fg35	ocs element-binding factor 1-like protein [Carex littledalei]	7.01701	14.2297	28.3241	53.9023	69.4305	10.4744		Ce000116Fg13	NAD(P)H-dependent 6'-deoxychalcone synthase-like protein [Carex littledalei]	0.149729	0.0303837	0.0608067	14.6241	12.297	20.4027
Ce000051Fg11	serine/threonine-protein phosphatase PP1-like protein [Carex littledalei]	57.3204	50.3753	48.1488	33.8402	26.9404	14.4248		Ce000083Fg29	pyrophosphate-energized membrane proton pump 3 [Carex littledalei]	140.208	137.823	149.272	61.4535	47.4962	33.9117		Ce000203Fg82_Ce000203Fg84	IAA-amino acid hydrolase ILR1-like 3 [Carex littledalei]	7.66415	11.6373	18.6974	32.1762	33.9155	25.504		Ce000116Fg15	Non-functional NADPH-dependent codeinone reductase 2 [Carex littledalei]	27.8162	32.2716	63.3551	51.5613	57.2003	84.9874
Ce000051Fg156	hypothetical protein FCM35_KLT20430 [Carex littledalei]	56.5942	58.3571	43.6427	24.4432	24.4713	20.0118		Ce000083Fg96	synaptotagmin-3-like protein [Carex littledalei]	31.3248	83.8013	136.312	10.9527	8.57001	0.846653		Ce000204Fg2	protein LONGIFOLIA 1-like protein [Carex littledalei]	4.23324	9.65589	7.21779	11.1214	24.1396	5.71165		Ce000116Fg35	hypothetical protein FCM35_KLT17329 [Carex littledalei]	7.08914	4.00796	6.341	15.761	22.6159	22.9858
Ce000051Fg17	Heavy-metal-associated domain-containing protein [Carex littledalei]	28.885	0.14315	0.294753	5.01795	9.12638	7.59441		Ce000084Fg1_Ce000084Fg2	pyrophosphate-energized vacuolar membrane proton pump [Carex littledalei]	30.9412	278.113	657.061	256.174	136.415	32.0096		Ce000205Fg50	NHL repeat [Carex littledalei]	14.6998	18.2108	19.111	32.3666	33.191	21.7206		Ce000116Fg4	hypothetical protein FCM35_KLT17256 [Carex littledalei]	11.109	13.2102	15.0822	25.6881	29.9341	35.3659
Ce000051Fg171	uncharacterized protein LOC109707519 isoform X3 [Ananas comosus]	28.7346	24.2653	16.0398	12.9605	12.1601	12.7052		Ce000084Fg106	uricase-like protein [Carex littledalei]	81.8411	188.326	252.066	146.882	105.219	58.0788		Ce000205Fg60	homeobox-leucine zipper protein HOX16-like protein [Carex littledalei]	95.3898	49.8801	62.4434	192.867	112.347	56.439		Ce000116Fg64	late embryogenesis abundant protein D-34-like protein [Carex littledalei]	0.194725	0.160185	0.769625	9.95162	34.8054	166.931
Ce000051Fg19	cell division cycle protein 48 [Carex littledalei]	121.273	87.1802	68.1309	29.4594	25.4803	10.8166		Ce000084Fg19	hypothetical protein B296_00054086 [Ensete ventricosum]	4.6078	26.6229	18.4012	12.5413	11.493	4.71421		Ce000205Fg71	enolase 1 [Carex littledalei]	67.2043	95.0033	106.637	172.146	172.291	57.7153		Ce000117Fg27	LYR motif-containing protein 4 [Carex littledalei]	15.9094	9.86739	11.7365	22.8377	28.4757	50.8537
Ce000051Fg30	putative kinase-like protein TMKL1 [Carex littledalei]	16.2199	5.18983	5.79434	8.39207	11.4437	5.81004		Ce000084Fg25	hypothetical protein FCM35_KLT04915 [Carex littledalei]	36.6949	49.5441	53.5434	29.192	23.2834	11.9905		Ce000205Fg8	endoglucanase 11 [Carex littledalei]	10.0402	12.3621	37.22	41.2199	38.9505	2.42773		Ce000117Fg40	RNA polymerase-associated protein LEO1 [Carex littledalei]	18.4684	20.4032	18.9824	33.9246	23.664	43.2384
Ce000051Fg37	NADH dehydrogenase [ubiquinone] 1 alpha subcomplex subunit 9, mitochondrial [Vitis vinifera]	75.7377	64.602	54.7607	35.3635	27.8567	15.1026		Ce000084Fg59	chaperone protein dnaJ 8 [Carex littledalei]	172.434	169.755	190.016	27.6628	10.6176	4.17185		Ce000205Fg95	heat shock protein 83-like protein [Carex littledalei]	10.0407	16.9295	25.5738	35.7744	42.0477	17.5609		Ce000117Fg47	cell division control protein 48 B isoform X1 [Carex littledalei]	2.64066	1.3864	2.58633	6.2362	4.07133	8.57146
Ce000051Fg41_Ce000051Fg42	Mediator of RNA polymerase II transcription subunit 15a [Carex littledalei]	68.8951	60.808	55.8567	42.2334	33.1006	37.2968		Ce000084Fg91	RING-H2 finger protein ATL56-like protein [Carex littledalei]	63.6553	133.492	160.381	60.9447	50.3906	17.6171		Ce000206Fg48	TPR repeat-containing thioredoxin TDX isoform X1 [Carex littledalei]	35.5692	39.3999	48.111	63.3934	83.4068	69.5512		Ce000117Fg97	UDP-glycosyltransferase 85A5-like protein [Carex littledalei]	0.183889	0	0	15.547	32.0773	22.4348
Ce000051Fg46	translational activator GCN1 [Carex littledalei]	44.3752	29.411	24.8769	27.2393	16.7955	22.0187		Ce000084Fg97	Actin like [Actinidia chinensis var. chinensis]	8.34285	69.1786	83.9929	16.6246	19.5182	6.72417		Ce000206Fg56	hypothetical protein BRADI_2g43846v3 [Brachypodium distachyon]	2.3089	0.577017	0.624449	6.12283	3.89124	4.07836		Ce000118Fg56	unnamed protein product [Ananas comosus var. bracteatus]	40.2041	13.1719	17.668	60.5535	47.2815	71.4517
Ce000051Fg7	HR-like lesion-inducing [Carex littledalei]	41.4631	16.8804	10.1064	7.6789	5.73548	4.595		Ce000085Fg101	Tubulin alpha-3 chain [Carex littledalei]	325.753	425.503	319.742	70.34	42.8381	12.5286		Ce000206Fg72	Dihydrolipoyllysine-residue acetyltransferase component 4 of pyruvate dehydrogenase [Carex littledalei]	124.806	124.619	154.678	481.568	492.272	312.166		Ce000118Fg72	mitochondrial aldehyde dehydrogenase 2 [Carex littledalei]	193.785	148.062	233.344	509.685	447.934	768.867
Ce000051Fg73	hypothetical protein GOBAR_DD26023 [Gossypium barbadense]	183.779	85.9202	80.0854	131.036	114.89	125.871		Ce000085Fg14	uncharacterized protein ycf45 [Ananas comosus]	34.8601	45.1312	21.4881	10.4895	8.76045	5.52969		Ce000207Fg25	LOW QUALITY PROTEIN: uncharacterized protein LOC109843814 [Asparagus officinalis]	8.04614	6.68504	12.6714	20.5683	18.5329	18.8848		Ce000118Fg82		3.29168	4.38852	7.67332	4.59337	6.3357	7.99488
Ce000051Fg74		23.4738	10.9071	6.2716	1.0193	0.474927	0.958028		Ce000085Fg27	Methylmalonate-semialdehyde dehydrogenase [acylating] mitochondrial [Zea mays]	89.2093	122.833	137.035	70.0891	57.2469	37.5891		Ce000207Fg44	mitochondrial fission 1 protein A-like protein [Carex littledalei]	15.7022	15.4452	23.5376	66.6589	69.7287	23.0491		Ce000118Fg83		2.52453	2.31203	1.84877	3.74771	4.13082	6.27126
Ce000051Fg84	Peroxisomal membrane protein [Carex littledalei]	32.1394	25.5915	14.14	10.9908	8.62917	4.18408		Ce000085Fg42	unnamed protein product, partial [Vitis vinifera]	56.0651	58.9383	50.8434	28.6935	25.995	15.724		Ce000208Fg62	protein sym-1-like protein [Carex littledalei]	5.63307	5.11245	7.47019	22.516	22.5644	17.6968		Ce000118Fg88	Autophagy-related protein 2 [Carex littledalei]	49.1895	25.2495	25.2574	31.1726	22.3055	57.2208
Ce000051Fg86	putative F-box protein PP2-B12 [Carex littledalei]	13.0798	2.26802	3.2572	2.58421	4.1137	6.43706		Ce000085Fg64	transcription factor bHLH79 isoform X1 [Carex littledalei]	24.4849	29.8843	18.6863	8.89403	6.163	7.9662		Ce000208Fg78	AP2/EREBP transcriptional factor WRI1 [Cyperus esculentus var. sativus]	0.917447	1.57582	6.02687	51.866	56.7541	14.1835		Ce000118Fg89	Autophagy-related protein 2 [Carex littledalei]	43.7469	21.1615	22.1739	25.4396	15.7696	47.9674
Ce000051Fg94	serine/threonine protein phosphatase 2A regulatory subunit B''beta-like protein [Carex littledalei]	22.9622	14.3376	10.5849	7.98154	8.50464	3.4612		Ce000085Fg74	prolyl 4-hydroxylase subunit alpha-1-like protein [Carex littledalei]	8.56148	52.8542	107.561	13.3854	8.30944	0.608259		Ce000208Fg9	hypothetical protein EJB05_54849 [Eragrostis curvula]	11.138	19.4531	23.1489	37.1033	39.5538	28.206		Ce000119Fg47	mediator of RNA polymerase II transcription subunit 25 isoform X2 [Carex littledalei]	27.922	18.3291	20.8343	28.7536	37.4435	101.147
Ce000052Fg101	phospholipid-transporting ATPase 1-like isoform X1 [Carex littledalei]	20.301	8.7589	5.72142	1.35215	1.71193	1.68116		Ce000085Fg82	squalene synthase-like isoform X1 [Carex littledalei]	22.9448	32.587	25.5147	9.81869	7.59921	4.16878		Ce000209Fg24	malate dehydrogenase [Carex littledalei]	45.0391	39.3668	58.0466	202.199	283.299	231.681		Ce000119Fg68	unnamed protein product [Brassica rapa]	21.6201	21.3108	22.4888	30.9637	40.4364	65.235
Ce000052Fg142	hypothetical protein FCM35_KLT12613 [Carex littledalei]	34.6339	16.2032	12.5448	7.93351	6.75901	5.26326		Ce000085Fg85	hypothetical protein C4D60_Mb02t13420 [Musa balbisiana]	35.6894	67.1364	129.892	29.3864	19.3719	7.25964		Ce000209Fg4	fructose-bisphosphate aldolase-lysine N-methyltransferase [Carex littledalei]	0.849259	1.70076	2.40148	6.51595	4.79685	4.08464		Ce000119Fg76	putative cytosolic iron-sulfur protein assembly protein CIAO1 [Carex littledalei]	29.701	19.5558	13.7134	30.9449	26.4739	27.8975
Ce000052Fg147	CBL-interacting protein kinase 32 isoform X3 [Carex littledalei]	23.0599	15.1827	22.5355	24.9707	15.0112	9.42007		Ce000086Fg51	26S protease regulatory subunit 6a [Trifolium pratense]	92.9174	90.4801	91.1317	57.0245	44.8041	27.5584		Ce000210Fg1	hypothetical protein CMV_020628 [Castanea mollissima]	0.250473	0	1.52533	3.81558	6.76633	1.53202		Ce000120Fg12	Rhizopine catabolism protein MocA [Carex littledalei]	9.35575	17.5233	17.9878	17.3244	13.3688	24.2451
Ce000052Fg150	mediator of RNA polymerase II transcription subunit 13 [Carex littledalei]	18.7106	11.8709	10.715	10.1557	7.84753	7.73566		Ce000086Fg76	calcium uptake protein 1 [Carex littledalei]	208.556	206.375	245.336	57.3103	24.2166	5.62222		Ce000210Fg29	Protein RETICULATA-RELATED 6 [Carex littledalei]	31.1998	39.9929	45.0408	77.6053	66.1055	53.6118		Ce000120Fg18	4-hydroxy-tetrahydrodipicolinate synthase [Carex littledalei]	11.841	15.3289	11.7528	20.3844	23.9991	26.6377
Ce000052Fg18	hypothetical protein B296_00016073 [Ensete ventricosum]	45.9283	15.4339	8.02443	0.183396	0.153386	0		Ce000086Fg77	Protein NUCLEAR FUSION DEFECTIVE 4 [Carex littledalei]	28.151	53.286	32.8294	7.55601	6.40573	12.7734		Ce000210Fg30	protein IN CHLOROPLAST ATPASE BIOGENESIS, chloroplastic isoform X4 [Populus alba]	10.3929	12.6775	18.1303	19.7688	21.3315	14.8989		Ce000120Fg66	Protein FAM210B [Carex littledalei]	7.4409	2.68003	4.56165	9.23125	15.2773	12.0237
Ce000052Fg38	Fasciclin-like arabinogalactan protein 7 [Carex littledalei]	129.511	70.411	81.3176	18.2375	8.79387	1.72896		Ce000087Fg104	hypothetical protein M569_02967, partial [Genlisea aurea]	13.8764	31.1502	12.0947	1.18957	0.147231	0		Ce000210Fg58	hypothetical protein FCM35_KLT20831 [Carex littledalei]	27.6721	42.7012	70.5347	199.261	245.402	132.273		Ce000120Fg90	RAN GTPase-activating protein 2-like protein [Carex littledalei]	35.4713	16.9489	20.0673	49.3632	51.9435	76.9173
Ce000052Fg71	GPI-anchored protein LORELEI [Carex littledalei]	52.2029	27.4773	16.2848	6.89548	8.29319	7.4706		Ce000087Fg109	CBS domain-containing protein CBSX5-like protein [Carex littledalei]	31.6739	54.6927	47.2142	18.7714	9.68561	1.68995		Ce000211Fg50	zinc finger protein CONSTANS-LIKE 1-like protein [Carex littledalei]	5.4865	4.89698	4.71874	8.02767	14.1978	8.69365		Ce000120Fg91	Late embryogenesis abundant protein D-34 [Carex littledalei]	0.0895213	0.250978	5.5561	80.1638	172.711	606.485
Ce000053Fg113	putative protein phosphatase 2C 64-like protein [Carex littledalei]	17.646	16.7855	14.041	11.6022	7.07799	3.68056		Ce000087Fg13	putative metal-nicotianamine transporter YSL9 isoform X1 [Carex littledalei]	15.8066	33.0306	27.0089	11.344	12.5146	9.15066		Ce000213Fg4	tyrosyl-DNA phosphodiesterase 1 isoform X2 [Carex littledalei]	22.2108	31.5308	42.9902	47.5615	31.6732	29.0569		Ce000120Fg94	Late embryogenesis abundant protein D-34 [Carex littledalei]	0.04003	0.0825493	1.47155	27.4137	62.5749	236.067
Ce000053Fg12	hypothetical protein FCM35_KLT16861 [Carex littledalei]	15.9282	1.15938	1.66608	7.82655	5.92969	3.64333		Ce000087Fg36	Kinesin-like protein NACK2 [Carex littledalei]	18.5341	23.6468	16.8736	10.9115	5.671	2.36162		Ce000213Fg46	pentatricopeptide repeat-containing protein [Carex littledalei]	3.54145	3.04651	4.89025	9.26957	9.15032	4.96782		Ce000121Fg5	unnamed protein product [Brassica rapa]	23.7982	22.4501	23.3953	31.233	40.9639	66.0515
Ce000053Fg14	protein CURVATURE THYLAKOID 1D [Carex littledalei]	30.2295	29.3564	20.5787	7.72767	7.1378	2.06885		Ce000087Fg41	autophagy-related protein 13-like isoform X2 [Carex littledalei]	20.4028	24.2321	32.629	16.2216	16.4539	8.82879		Ce000213Fg77	uncharacterized protein LOC109714840 [Ananas comosus]	4.73856	6.20897	5.22846	9.94144	11.6214	7.61179		Ce000121Fg60	Small RNA degrading nuclease 3 [Carex littledalei]	17.4347	4.79883	5.99568	14.5866	10.6568	13.1175
Ce000053Fg73	tuliposide A-converting enzyme 1 [Carex littledalei]	22.8772	12.0467	13.889	6.33812	4.74504	2.77458		Ce000087Fg81	transcription factor LAF1-like protein [Carex littledalei]	61.9899	151.794	70.8128	11.3365	2.22565	1.33091		Ce000214Fg57	uncharacterized protein LOC103704917 [Phoenix dactylifera]	3.92198	6.64498	7.60095	10.29	9.57953	5.91871		Ce000122Fg116	U2 small nuclear ribonucleoprotein B'' 2 isoform X1 [Carex littledalei]	64.3706	45.1115	49.1838	111.643	95.5816	135.671
Ce000053Fg81		14.2577	4.92681	9.86421	4.31509	6.18294	1.17887		Ce000087Fg96	RING finger protein 185 [Carex littledalei]	146.626	181.461	243.566	152.496	122.811	34.715		Ce000215Fg49	RHOMBOID-like protein 9 [Carex littledalei]	6.15316	3.76182	5.22342	13.4277	13.0524	12.8241		Ce000122Fg73	ran-binding protein 1 b [Carex littledalei]	188.369	266.068	245.012	270.957	337.353	783.786
Ce000053Fg86	putative protein phosphatase 2C 12 isoform X3 [Carex littledalei]	42.8661	27.8806	22.6604	11.1519	12.1905	9.99775		Ce000088Fg35	N-glycosylase/DNA lyase OGG1 isoform X1 [Carex littledalei]	6.07535	12.2661	16.2735	5.81928	2.39709	1.33367		Ce000215Fg62	stromal heat shock-related protein [Carex littledalei]	16.9228	47.3532	121.416	54.2854	101.472	80.1619		Ce000122Fg9	thioredoxin-like protein AAED1 [Carex littledalei]	1.1311	2.59053	3.445	6.70908	12.1373	23.8361
Ce000053Fg89	calcium-binding protein CML24-like protein [Carex littledalei]	40.6743	7.35427	18.3861	10.62	7.35268	5.45813		Ce000088Fg87	mitogen-activated protein kinase kinase kinase YODA-like protein [Carex littledalei]	51.8728	68.4177	80.4054	32.1685	31.0647	22.781		Ce000215Fg7	E3 ubiquitin-protein ligase RNF19B-like protein [Carex littledalei]	1.28058	1.91848	5.39139	7.02784	8.38703	0.734783		Ce000122Fg94	photosystem II CP47 protein, partial [Cyperus papyrus]	57.1251	15.7127	61.1068	181.658	175.18	182.852
Ce000054Fg12	BSD domain-containing protein 1-like protein [Carex littledalei]	18.5872	15.3125	16.3323	6.73246	7.51793	4.37421		Ce000089Fg33	Protein TRANSPARENT TESTA 12 [Carex littledalei]	19.4245	58.6753	33.0299	2.745	0.88948	0.580432		Ce000218Fg70	phospholipase D family protein [Carex littledalei]	22.2495	44.1739	55.6785	59.4	49.7058	20.3709		Ce000123Fg45	hypothetical protein E2562_005727 [Oryza meyeriana var. granulata]	62.671	48.322	54.5933	72.5444	76.1357	174.665
Ce000054Fg125	hydroxyphenylpyruvate reductase-like protein [Carex littledalei]	31.9919	21.0737	19.2451	11.2495	11.3597	8.88468		Ce000089Fg47	purple acid phosphatase 18-like protein [Carex littledalei]	26.4217	40.3658	55.3793	39.2967	36.8607	35.0368		Ce000218Fg71	high mobility group B protein 9-like protein [Carex littledalei]	0.848363	4.0412	7.81461	19.5514	19.5267	3.89943		Ce000123Fg46	Bifunctional nitrilase/nitrile hydratase NIT4B [Vitis vinifera]	31.7061	23.4828	28.3135	37.7215	44.7496	123.414
Ce000054Fg13	Protein TolB [Carex littledalei]	42.2905	13.6677	13.3505	8.20346	7.03374	4.70214		Ce000089Fg76	30S ribosomal protein S5 [Morus notabilis]	15.8092	32.1827	34.2179	31.7075	21.8457	21.2458		Ce000219Fg15	CDGSH iron-sulfur domain-containing protein NEET [Carex littledalei]	4.7763	9.43374	11.3331	17.7989	25.5807	21.6023		Ce000123Fg99	hypothetical protein C4D60_Mb10t23190 [Musa balbisiana]	1.92217	2.43661	3.0745	6.77461	7.30189	8.50233
Ce000054Fg157	Post-GPI attachment to proteins factor 3 [Carex littledalei]	19.8644	19.5681	11.8275	7.29771	5.95411	3.40722		Ce000090Fg36	hypothetical protein F2Q69_00005297 [Brassica cretica]	47.1955	71.6404	39.111	13.154	10.7805	5.64785		Ce000219Fg60	hypothetical protein FCM35_KLT13606 [Carex littledalei]	0.793647	0.433967	4.86493	39.8235	14.6232	13.7434		Ce000124Fg100	peroxiredoxin-2F, mitochondrial isoform X1 [Solanum lycopersicum]	30.0668	19.5359	19.7347	28.8522	42.3894	78.9412
Ce000054Fg19	ABC transporter D family member 1 [Ananas comosus]	13.6574	9.49781	7.2721	6.51621	5.63955	6.11556		Ce000090Fg37	Transaldolase [Carex littledalei]	226.611	250.569	271.952	231.153	167.763	89.7233		Ce000220Fg21	long chain acyl-CoA synthetase 4-like protein [Carex littledalei]	158.177	124.201	238.763	409.948	344.94	104.439		Ce000124Fg68	periodic tryptophan protein 2 [Carex littledalei]	7.79002	3.5824	6.85389	15.7976	12.4996	17.3028
Ce000054Fg54	acyl-protein thioesterase 2-like protein [Carex littledalei]	44.192	40.8082	33.0867	11.7311	9.00556	6.84645		Ce000090Fg71	Ring finger domain-containing protein [Carex littledalei]	30.2118	38.1191	39.9599	15.7275	14.4555	13.7749		Ce000220Fg22	long chain acyl-CoA synthetase 4-like protein [Carex littledalei]	157.897	127.809	243.364	379.198	310.205	75.5176		Ce000124Fg75	chaperone protein ClpB1 [Carex littledalei]	33.6088	38.9496	93.3918	63.9602	120.363	152.67
Ce000054Fg59	hypothetical protein F2Q69_00000845 [Brassica cretica]	19.8434	14.671	13.5915	11.3092	12.0393	9.21901		Ce000090Fg81	vesicle-associated protein 4-1-like protein [Carex littledalei]	41.0941	43.141	67.722	34.4532	23.1681	14.3518		Ce000220Fg28	hypothetical protein FCM35_KLT21592 [Carex littledalei]	39.808	33.3032	37.3124	107.707	67.7096	65.079		Ce000124Fg80	nuclear pore complex protein NUP35 [Carex littledalei]	5.30876	3.99261	7.62205	7.28061	8.41743	11.0623
Ce000054Fg82	cellulose synthase A1 [Bambusa emeiensis]	150.365	100.404	56.5666	29.3654	19.8251	8.57353		Ce000090Fg91	Wound-induced protein [Carex littledalei]	493.873	755.784	755.76	268.877	238.683	136.993		Ce000220Fg31	lipase class 3 family protein-like protein [Carex littledalei]	9.18523	10.6938	27.1156	111.638	142.817	15.9777		Ce000125Fg102	eukaryotic translation initiation factor 2 subunit gamma-like protein [Carex littledalei]	51.1848	40.6854	48.8794	104.636	104.527	267.197
Ce000054Fg99	heme oxygenase 1 [Carex littledalei]	21.8555	24.0465	15.7304	6.50084	4.39587	2.8596		Ce000091Fg19	F-box/LRR-repeat protein [Carex littledalei]	20.4416	40.6924	92.5227	9.06753	6.74117	1.20751		Ce000220Fg8	hypothetical protein GW17_00029727 [Ensete ventricosum]	195.912	88.7166	93.2899	189.661	144.94	152.877		Ce000125Fg116	Eukaryotic translation initiation factor 5A [Vitis vinifera]	127.748	98.6566	105.667	183.757	170.992	339.63
Ce000055Fg116	vacuolar protein sorting-associated protein 28 homolog 1-like [Ananas comosus]	58.0612	46.0967	35.9094	18.1186	14.273	7.57125		Ce000091Fg27	calmodulin-like protein [Carex littledalei]	39.4654	82.8336	62.4053	3.44786	1.91365	0.659614		Ce000221Fg5		2.75528	2.25002	2.61728	7.97225	6.89663	5.57979		Ce000125Fg53	trihelix transcription factor GT-1-like isoform X1 [Carex littledalei]	9.66972	4.84048	5.02185	13.2238	20.032	29.7536
Ce000055Fg135	hypothetical protein CDL15_Pgr005278 [Punica granatum]	101.677	78.1827	78.2082	38.5352	32.2714	29.7082		Ce000091Fg36	phytochrome B [Carex littledalei]	21.5682	47.8211	47.8176	24.5221	15.2497	19.1643		Ce000222Fg20_Ce000222Fg21	U11/U12 small nuclear ribonucleoprotein [Carex littledalei]	11.1271	5.29121	5.31914	14.9127	11.5572	9.56235		Ce000125Fg58	protein Iojap-related [Carex littledalei]	4.43986	1.48014	1.68667	5.58429	5.33638	10.1049
Ce000055Fg138	putative voltage-gated potassium channel subunit beta [Carex littledalei]	42.467	34.2098	22.361	7.41089	7.10777	5.8284		Ce000091Fg37	phytochrome B, partial [Eleocharis dulcis]	21.9896	51.6678	48.1242	22.7894	13.1633	14.1347		Ce000222Fg24	U-box domain-containing protein 9 [Carex littledalei]	12.214	12.44	32.0812	72.7314	72.4573	37.8773		Ce000125Fg59		4.41101	3.23497	3.19458	4.9049	6.78291	9.19657
Ce000055Fg14	hypothetical protein EJB05_43889, partial [Eragrostis curvula]	35.1352	31.8398	29.9866	23.812	21.079	13.0833		Ce000091Fg52	putative glutamyl endopeptidase [Carex littledalei]	22.4056	35.6375	24.124	11.495	5.65646	1.60229		Ce000223Fg50	zinc-finger of the FCS-type, C2-C2 [Carex littledalei]	19.8799	40.8709	62.7529	48.9058	54.0436	12.5534		Ce000126Fg41	serine/threonine-protein phosphatase PP1 isoform X1 [Carex littledalei]	27.0852	19.2263	20.069	72.8823	63.4872	113.538
Ce000055Fg21	sucrose transport protein SUT4 [Setaria viridis]	22.8731	20.7029	13.8496	6.019	7.69826	4.30232		Ce000091Fg56	ocs element-binding factor 1-like protein [Carex littledalei]	258.105	576.975	537.891	162.064	114.491	80.1075		Ce000224Fg109	7-hydroxymethyl chlorophyll a reductase [Carex littledalei]	5.13848	4.33365	5.96011	17.3388	13.398	13.3412		Ce000126Fg48	Protein RKD3 [Dendrobium catenatum]	3.88815	1.42271	1.9522	7.1831	8.05133	11.7485
Ce000055Fg32	transmembrane protein 53 [Elaeis guineensis]	18.236	18.1059	6.70505	1.66913	1.798	3.52611		Ce000091Fg68	universal stress protein A-like protein [Elaeis guineensis]	384.473	577.084	852.456	407.615	249.34	155.583		Ce000224Fg34	Superoxide dismutase [Fe] 2 [Carex littledalei]	8.68506	7.69067	10.5481	21.1766	13.2836	8.69082		Ce000127Fg12	hypothetical protein POPTR_017G037101 [Populus trichocarpa]	281.964	260.91	313.983	957.837	1003.21	1771.81
[truncated: 3,857 more rows]

## Sheet: Table S3
Table S3. GO analysis of DEGs related to tuber expansion.
GO_ID	GO_term	ontology	Items	Background_Items
GO:1902418	(+)-abscisic acid D-glucopyranosyl ester transmembrane transport	Biological Process	2	2
GO:0006075	(1->3)-beta-D-glucan biosynthetic process	Biological Process	32	40
GO:0006074	(1->3)-beta-D-glucan metabolic process	Biological Process	2	2
[truncated: 9,217 more rows]

## Sheet: Table S4
Table S4. DEGs during tuber expansion.
[truncated: 1,133 more rows]
[truncated: 4 more columns]

[truncated: 1 more sheets: Table S5]
